# Supplementary material for: Effects of Anticancer Agent P-bi-TAT on Gene Expression Link the Integrin Thyroid Hormone Receptor to Expression of Stemness and Energy Metabolism Genes in Cancer Cells
Source: Preprints.org preprint supplement (doi:10.20944/preprints202203.0125.v1), 2022-03-09

P-bi-TAT destroys the  
transcriptional architecture of the  
life-support infrastructure  
networks of cancer cells

**STUDY SUMMARY**

**Effect of the P-bi-TAT treatment on gene expression**

| Cell line  | Number of significantly affected genes | Up-regulated | Down-regulated | Number of significantly affected pathways | Number of affected genes in pathways |
|------------|----------------------------------------|--------------|----------------|-------------------------------------------|--------------------------------------|
| SUIT2-luc  | 1348                                   | 825          | 523            | 39                                        | 4 - 29                               |
| GBM 021913 | 5689                                   | 3277         | 2412           | 250                                       | 4 - 180                              |

**Filter criteria:**

**Fold change**                    **>1.5 or < -1.5**  
**P - Value**                        **< 0.05**

**P-bi-TAT destroys the transcriptional  
architecture of the life-support  
infrastructure of cancer cells**

**DECREASED EXPRESSION OF GENES  
REGULATING DNA SYNTHESIS,  
REPLICATION, AND CELL CYCLE  
PROGRESSION**

## GENES SIGNIFICANTLY DOWN-REGULATED FOLLOWING THE P-bi-TAT TREATMENT

### Pyrimidine metabolism:

DTYMK,DCTPP1,NT5C,UCK2,TK1,NME1-NME2,NME1,NME2,NME6,UPP1,UCKL1,ZNRD1,POLR2G,POLR3D,POLR3H,POLR1C,POLR1D,POLR1E,POLR2C,POLR2D,POLR2E,POLR2J2,POLR2J3,POLR2L,POLR3K,POLR2I,POLD2,POLE4

### Folate Metabolism:

SLC19A1,AHCY,GART,SAA4,SAA2,IL2,FLAD1

### Metabolism of nucleotides:

GART,PFAS,AK2,GUK1

### Nucleotide salvage:

ADK,UCKL1

### Nucleobase biosynthesis:

GART,PFAS

### Interconversion of nucleotide di- and triphosphates:

AK2,GUK1

### Regulation of DNA replication

CDT1,MCM5,MCM2

### Synthesis of DNA:

MCM5,MCM2,GIN52,FEN1

### S Phase:

CKS1B,MCM5,MCM2,GIN52,FEN1,CDKN1A,CDC25A,CDCA5

### Mitotic G2-G2/M phases:

PKMYT1,NUMA1,CDC25A,MYBL2,CDKN1A,FKBPL

## DNA SYNTHESIS AND CELL CYCLE PROGRESSION DESTRUCTION PYRAMID

# **P-bi-TAT destroys the transcriptional architecture of the life-support infrastructure of cancer cells**

**Interference with energy-producing, protein synthesis, and essential metabolic pathways**

## GENES SIGNIFICANTLY DOWN-REGULATED FOLLOWING THE P-bi-TAT TREATMENT

### Electron Transport Chain:

ATP5A1,ATP5I,COX6B1,ATP5G2,NDUFA8,NDUFA3,NDUFV2,NDUFA6,NDUFA2,COX5A,NDUFS7,COX6A1,COX4I1,SLC25A6,NDUFB3,ATP5G1,COX7A2,ND6,NDUFAB1,COX7B,NDUFB7,UQCRC1,COX5B,COX8A,NDUFV1,ATP5G3,SURF1,NDUFB2,NDUFS2,ATP5D,NDUFV3,NDUFA10,UCP2,NDUFS8,NDUFB8

### Cytoplasmic Ribosomal Proteins:

RPL10A,RPL8,RPL9,RPLP2,RPLP1,RPL35,RPL7A,RPL13,RPL14,RPL18A,RPL18,RPL19,RPL21,RPL27,RPL28,RPL29,RPL32,RPL39,UBA52,RPL41,RPL36A,RPS3,RPS9,RPS5,RPS15A,RPS16,RPS20,RPS14,RPS29,RPS11,RPS15,RPS7,RPS8,RPS10,RPS19,RPS26,RPS27,RPS27A,RPS28,FAU,RPLP0,RPS6KA1,RPL11,RPL10,RPL30,RPS2,RPS6KB2

### Oxidative phosphorylation:

ATP5A1,ATP5D,ATP5G2,ATP5G1,ATP5G3,ATP5I,NDUFA11,NDUFS7,NDUFA2,ND6,NDUFA8,NDUFS2,NDUFS8,NDUFB2,NDUFV2,NDUFV3

### Metabolism of carbohydrates:

SLC25A1,PCK1,SLC25A10,GALK1,GALT,PGLS,SLC37A4,AKR1B1,AKR1A1

### Glucose metabolism:

SLC25A1,PCK1,SLC25A10,SLC37A4

### Fatty acyl-CoA and cholesterol biosynthesis:

SLC25A1,PPT2,SLC27A3;  
FDPS,MVD,DHCR7,PMVK,FDFT1,MVK

### Globo Sphingolipid Metabolism:

ST3GAL1,ST6GALNAC4,  
ST6GALNAC6,ST6GAL1

### Biogenic Amine Synthesis:

DDC,ACHE,COMT

Effects of P-bi-TAT treatment on expression of genes encoding ATP synthases, H<sup>+</sup> transporting, mitochondrial F0 and F1 complexes

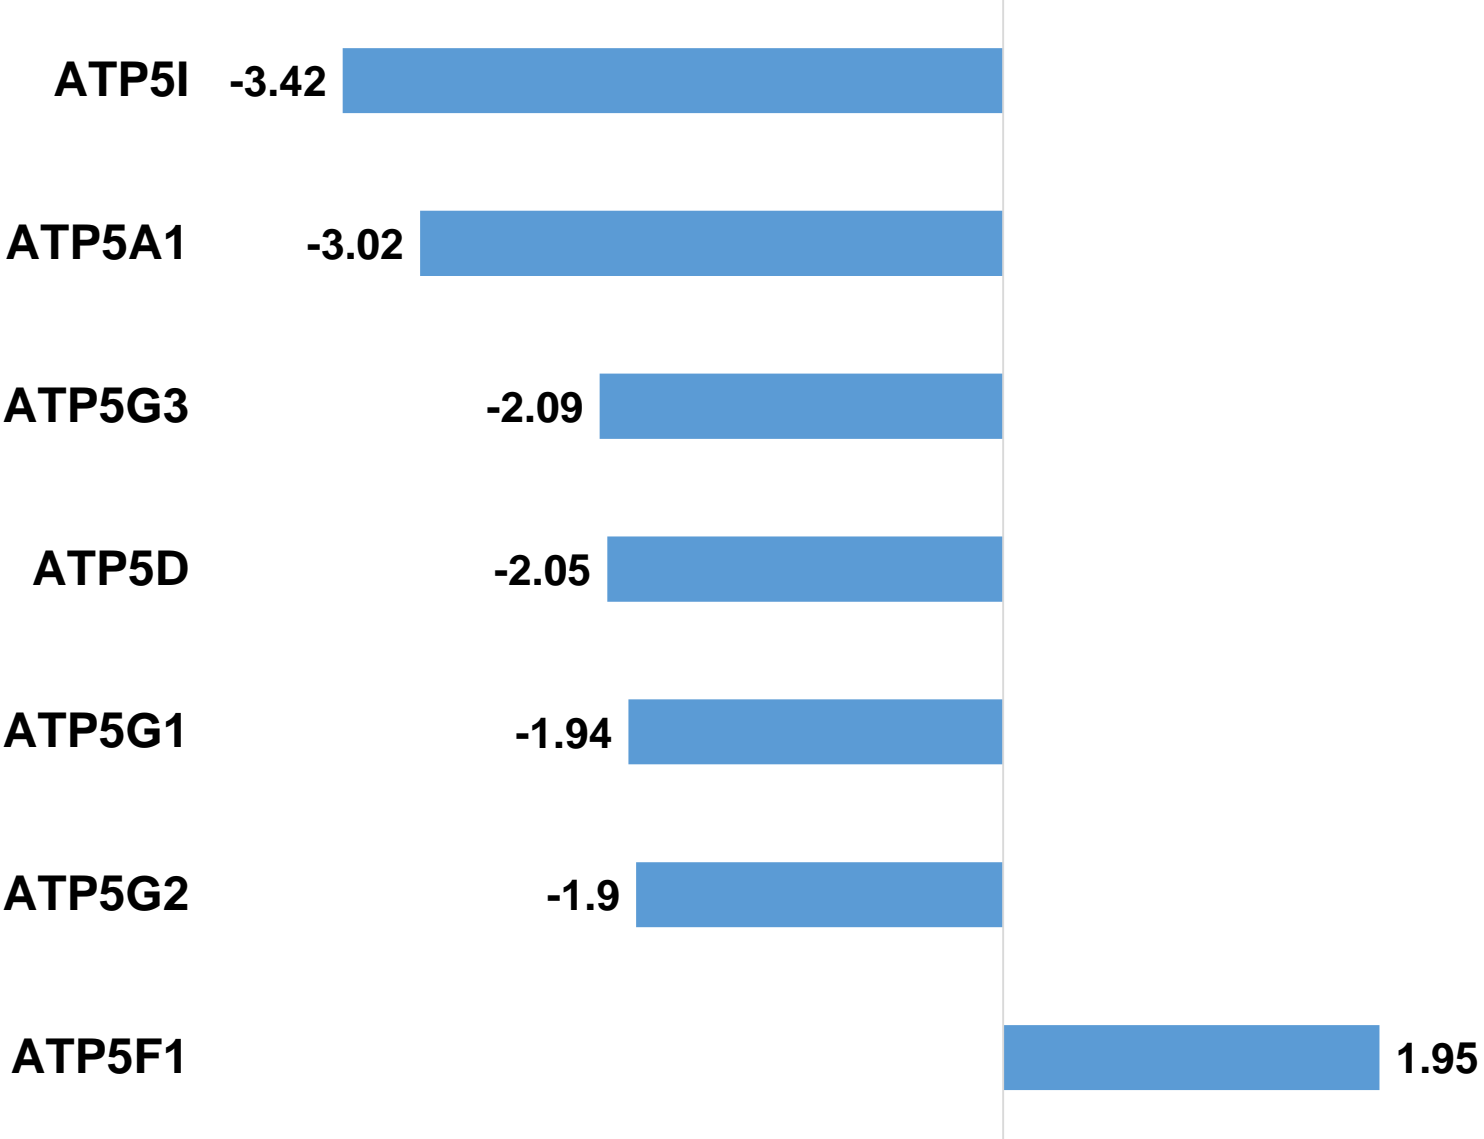

## Effects of P-bi-TAT treatment on expression of genes encoding NADH dehydrogenases

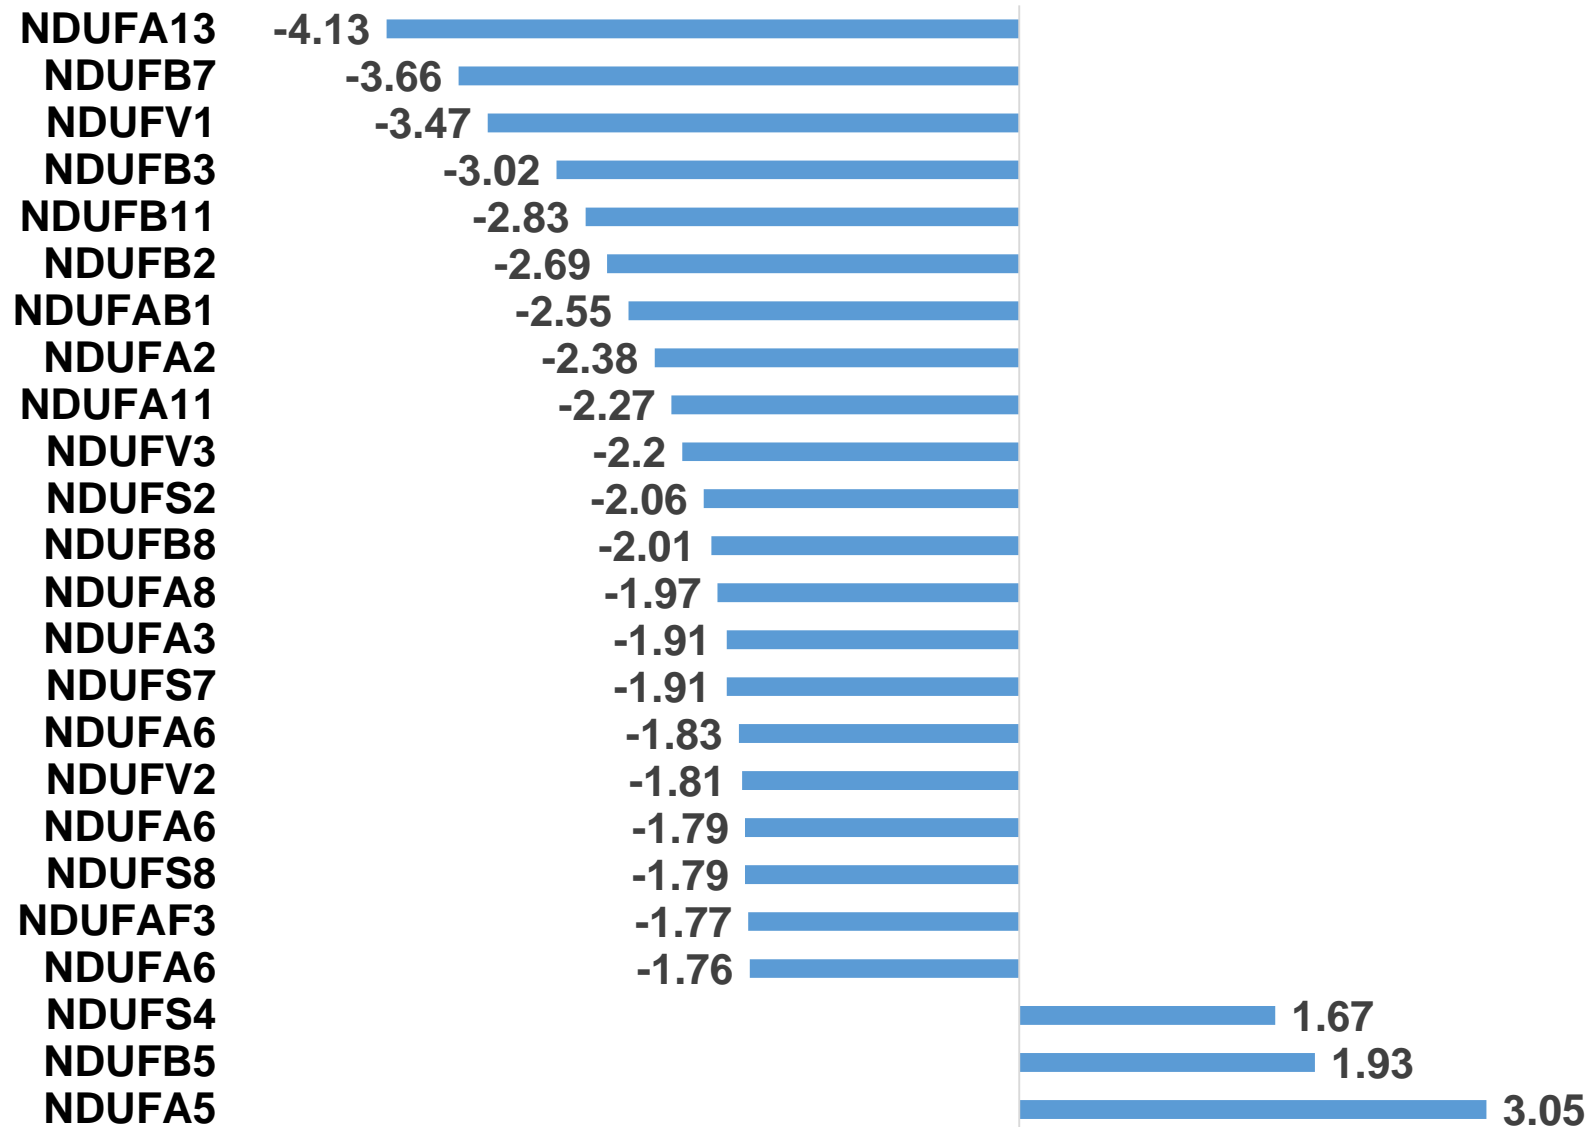



**P-bi-TAT destroys the transcriptional  
architecture of the life-support  
infrastructure of cancer cells**

**P-bi-TAT targets the cellular membranes'  
structure and functions by inhibiting  
expression of G-protein-coupled receptors  
(GPCRs).**

## GENES SIGNIFICANTLY DOWN-REGULATED FOLLOWING THE P-bi-TAT TREATMENT

### GPCR ligand binding:

XCR1,FPR1,RXFP3,PTGDR2,P2RY12,P2RY13,P2RY11,FFAR1,GHRHR,GPRC6A

### GPCRs, Class A Rhodopsin-like:

DRD2,HRH3,BDKRB1,FPR1,XCR1,MC1R,NTSR1,OPRM1,SSTR5,OR1F1,OR1E1,OR1D2,OR5V1,OR2B3,OR2J3,OR2H1,OR10H3,P2RY13,P2RY12,GPR4,P2RY11,CNR2,OR3A2,GPR171

### GPCRs, Other:

TAAR2,GPR88,NTSR1,P2RY13,OR1F1,OR1E1,OR2H1,GHRHR,GRM1,P2RY11

### Peptide GPCRs:

FPR1,BDKRB1,OPRM1,SSTR5,MC1R,NTSR1

### GPCRs, Class C Metabotropic glutamate, pheromone:

GRM1,GPRC5C,GPRC5A

### GPR40 Pathway:

PLCL1,PLCD3

**G-protein-coupled receptors** (GPCRs) are the largest and most diverse group of membrane receptors in eukaryotes. These cell surface receptors act like an inbox for messages in the form of light energy, peptides, lipids, sugars, and proteins. Such messages inform cells about the presence or absence of life-sustaining light or nutrients in their environment, or they convey information sent by other cells.

GPCRs play a key role in an incredible array of functions in the human body. Different GPCRs bind a tremendous variety of signaling molecules. Binding a signaling molecule to GPRCs causes a conformational change in the GPCR. This change then triggers the interaction between the GPCR and a nearby G protein.

**P-bi-TAT destroys the transcriptional  
architecture of the life-support  
infrastructure of cancer cells**

**Interference with essential oncogenic  
pathways**

## GENES SIGNIFICANTLY DOWN-REGULATED FOLLOWING THE P-bi-TAT TREATMENT

### Target Of Rapamycin (TOR) Signaling:

MLST8,CDC42,RHEB,ULK3,AKT1,PRR5L,EIF4EBP1

### PIP3 activates AKT signaling:

BAD,RPS6KB2,AKT1

### ErbB Signaling Pathway:

ERBB2,ARAF,BAD,SRC,JUN,HBEGF,HRAS,CBL,PAK4

### RAF/MAP kinase cascade:

PHB,PEBP1,PPP5C

### Hedgehog Signaling Pathway:

ADRBK1,ARRB2,KIF7

### Telomere Maintenance:

NHP2,RUVBL2,FEN1

# **P-bi-TAT destroys the transcriptional architecture of the life-support infrastructure of cancer cells**

**Interference with chromatin remodeling and maintenance, transcription, and activated in cancer cells early-stage embryogenesis pathways**

## GENES SIGNIFICANTLY DOWN-REGULATED FOLLOWING THE P-bi-TAT TREATMENT

### **Histone Modifications:**

H3F3B,HIST1H3D,HIST1H3J,HIST2H3A,HIST2H3C,HIST2H3D,DOT1L,EHMT2,SETDB1,SMYD5,HIST1H4C,HIST1H4H,HIST1H4I,HIST1H4J,HIST4H4,HIST1H3C,HIST1H3G,HIST1H4K,HIST1H4E,HIST1H3H,HIST1H4B,HIST1H4L,HIST1H3A,HIST1H4G,HIST1H3F,HIST1H3B,HIST1H4F,HIST1H3I,HIST1H4D,HIST1H4A,HIST1H3E

### **RNA Polymerase I Transcription:**

TAF1C,POLR1D,POLR1C,PTRF,POLR2F,POLR2E,ZNRD1,POLR2L,POLR1E

### **Preimplantation Embryo Pathways:**

BARX2,FOXD1,TPRX1,DDIT3,BATF3,TEAD4,HMGA1,SOX2

### **Olfactory receptor activity:**

OR1E1,OR1F1,OR2H1,OR5V1,OR6C70,OR8K3,OR9G1,OR1L6,OR2T34,OR4K15,OR5P2,OR2B3,OR2G3,OR10H3,OR8B12,OR2J3,OR51I1,OR4D1,OR4M1,OR8H3,OR51E2,OR56A1,OR8U1,OR5L1,OR1D2,OR56B4,OR10A7,OR3A2,OR6C4,OR10J3,OR2AE1,OR2B11,OR51M1,OR2K2,OR5AP2,OR13G1,OR52M1,OR4S2,OR5AK2,OR8B3,OR5B2,OR1S2

### **GPCRs, Class A Rhodopsin-like:**

DRD2,HRH3,BDKRB1,FPR1,XCR1,MC1R,NTSR1,OPRM1,SSTR5,OR1F1,OR1E1,OR1D2,OR5V1,OR2B3,OR2J3,OR2H1,OR10H3,P2RY13,P2RY12,GPR4,P2RY11,CNR2,OR3A2,GPR171

# **P-bi-TAT destroys the transcriptional architecture of the life-support infrastructure of cancer cells**

**Interference with networks implicated in collagen degradation, destruction of the extracellular matrix, and activation of metalloproteinases**

## GENES SIGNIFICANTLY DOWN-REGULATED FOLLOWING THE P-bi-TAT TREATMENT

### **Degradation of the extracellular matrix:**

MMP19,BSG,CAST

### **Activation of Matrix Metalloproteinases:**

TIMP1,MMP7,FURIN

### **Collagen degradation:**

FURIN,MMP19

### **Matrix Metalloproteinases:**

MMP7,MMP19,BSG,TIMP1



**Biotransformation is the chemical modification (or modifications) made by an organism on a chemical compound.**

**Biotransformation means chemical alteration of chemicals such as nutrients, amino acids, toxins, and drugs in the body.**

Phase I reactions convert a parent drug to more polar (water soluble) **active metabolites** by unmasking or inserting a polar functional group (-OH, -SH, -NH<sub>2</sub>)

Phase II reactions convert a parent drug to more polar (water soluble) **inactive metabolites** by conjugation of subgroups to -OH, -SH, -NH<sub>2</sub> functional groups on drug

# **Expression of genes regulating the BIOTRANSFORMATION METAPATHWAY is markedly affected by the P-bi-TAT treatment**

## **UP-regulated (10 genes):**

CYP1B1,FMO4,CYP4V2,CYP51A1,KCNAB3,GSTCD,MGST1,H  
S2ST1,HS3ST3A1,HS6ST3

## **Down-regulated (25 genes):**

CYP3A5,AKR1A1,AKR7A3,EPHX1,COMT,NNMT,  
CYP19A1,AKR1D1,AKR1B1,KCNAB1,GPX1,GPX4,  
GSTM2,GSTM3,GSTM4,GSTO1,GSTT2,GSTT2B,  
GSTZ1,MGST3,GSS,NAT14,CHST7,CHST10,NDST1

Phase I reactions convert a parent drug to more polar (water soluble) **active metabolites** by unmasking or inserting a polar functional group (-OH, -SH, -NH<sub>2</sub>)

Phase I biotransformation genes are predominantly **UP-REGULATED** by P-bi-TAT:  
CYP51A1,CYP1B1,CYP4V2; CES1,ESD,LIPA,PON2

CONCLUSION: P-bi-TAT would facilitate **MORE EFFICIENT** drug conversion to **ACTIVE METABOLITES**

Phase II reactions convert a parent drug to more polar (water soluble) **inactive metabolites** by conjugation of subgroups to -OH, -SH, -NH<sub>2</sub> functional groups on drug

Phase II biotransformation genes are predominantly **DOWN-REGULATED** by P-bi-TAT:  
COMT,NNMT,PNP,AKR1A1

CONCLUSION: P-bi-TAT would facilitate **LESS EFFICIENT** drug conversion to **INACTIVE METABOLITES**

# Effects of P-bi-TAT treatment on expression of genes encoding interleukins, chemokines, and their receptors

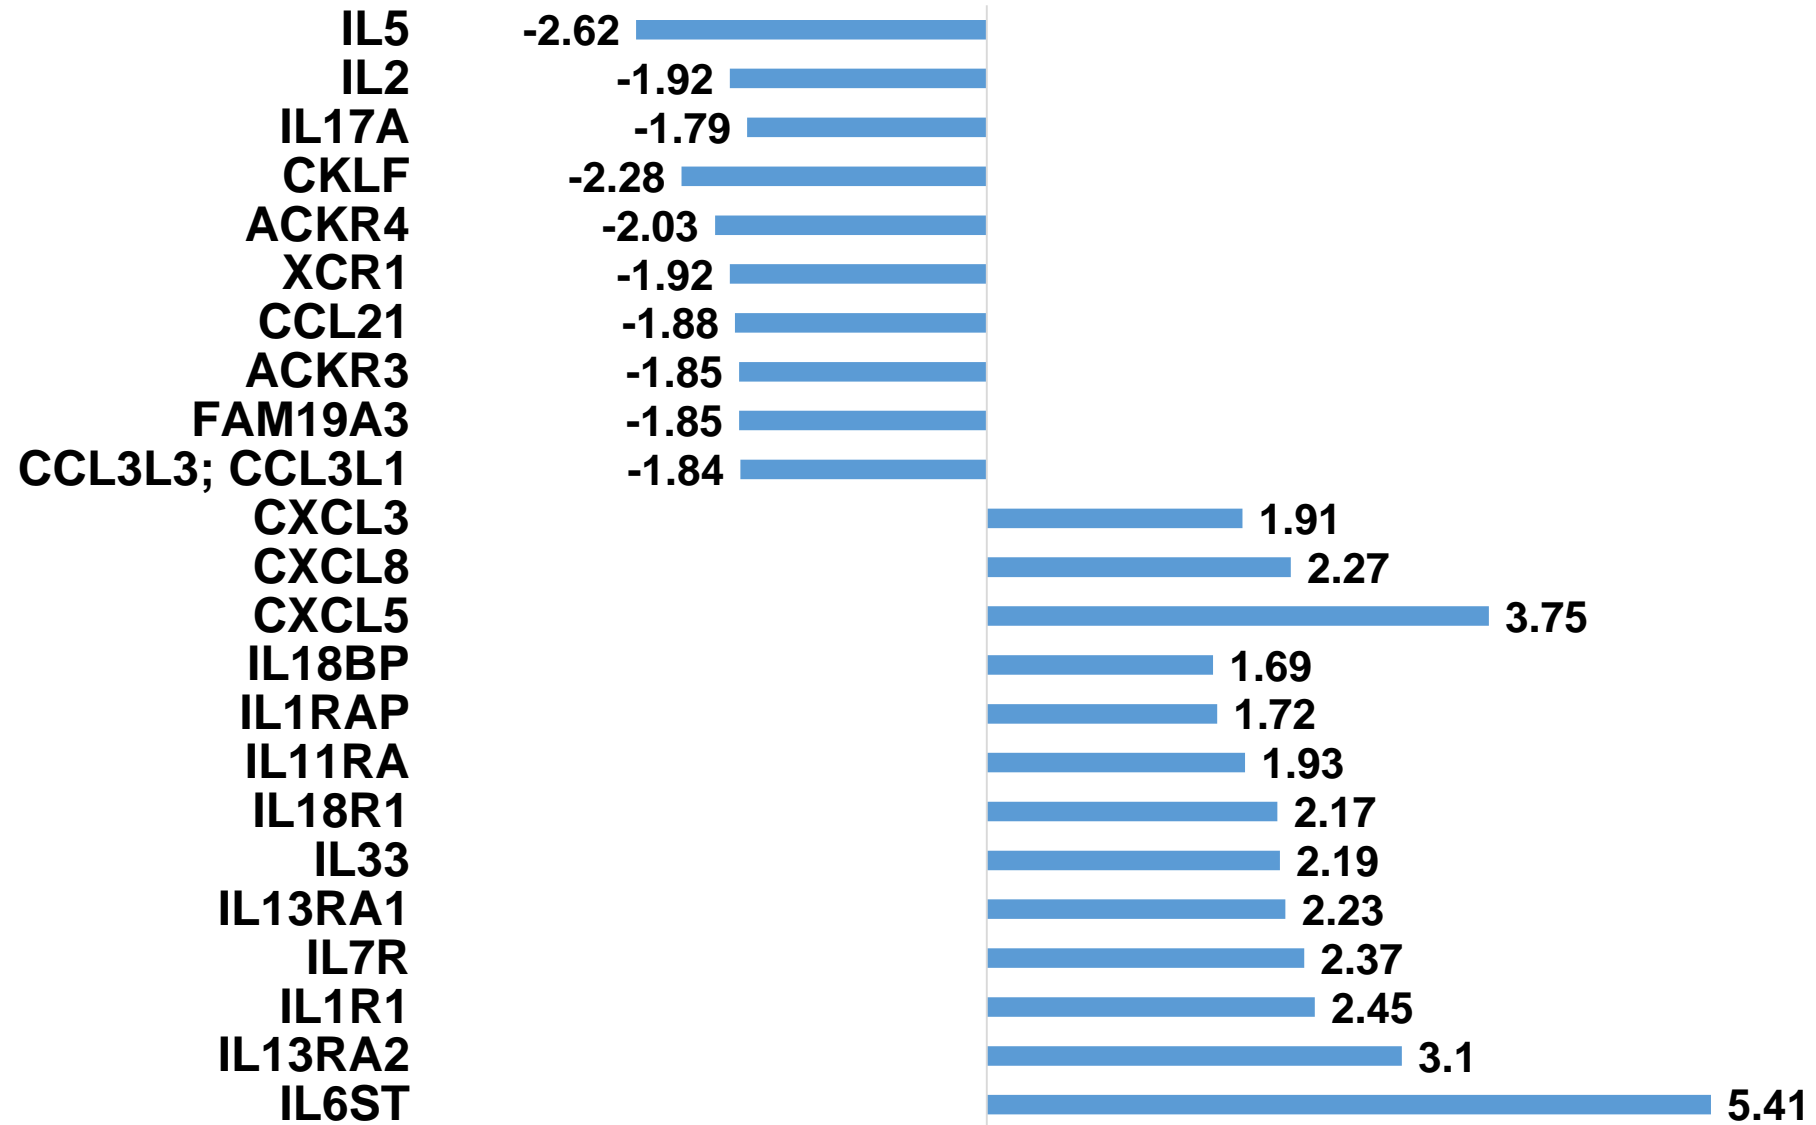

**Effects of P-bi-TAT treatment on expression of genes encoding  
topoisomerases and topoisomerase-binding ptoteins**

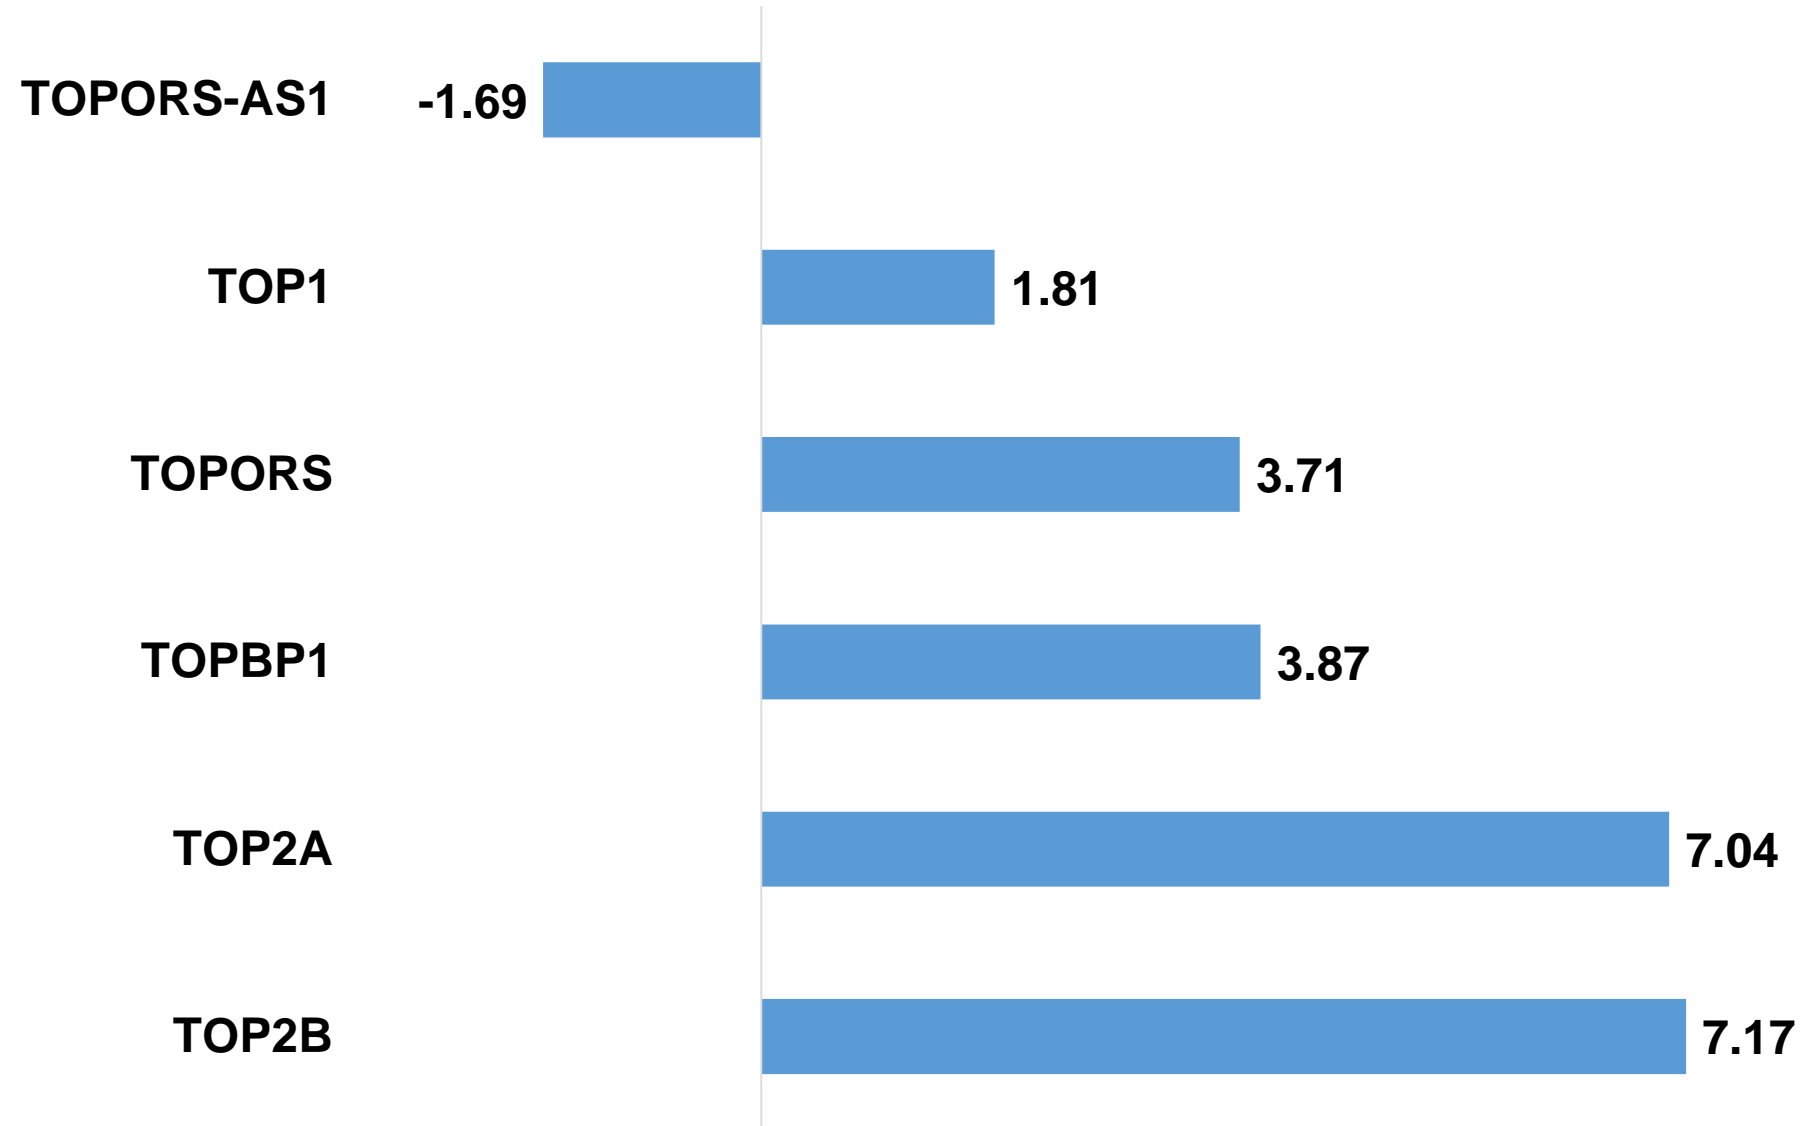

Supplement: Supplementary file 3 [file supplementary]
