# Supplementary material for: Effects of Anticancer Agent P-bi-TAT on Gene Expression Link the Integrin Thyroid Hormone Receptor to Expression of Stemness and Energy Metabolism Genes in Cancer Cells
Source: Preprints.org preprint supplement (doi:10.20944/preprints202203.0125.v1), 2022-03-09
Supplement: Supplementary file 1 [file supplementary]

## STUDY OVERVIEW

Human cancer cell line models:

Primary human glioblastoma cells

GBM 021913

Pancreatic cancer cell line

SUIT2-luc

- Treated with 30  $\mu$ M of P-bi-TAT (n = 3)
- After 24 hours, cells were collected in tri reagent
- Samples given to Microarray core facility for gene expression study (Using Affymetrix Protocol for Clariom S Microarrays)
- No measurable effects on cells' morphology, growth, and viability were observed after 24 hours treatment with 30  $\mu$ M of P-bi-TAT

Filter criteria:

Fold change            >1.5 or < -1.5

P - Value                < 0.05

**STUDY SUMMARY**

**Effect of the P-bi-TAT treatment on gene expression**

| Cell line  | Number of significantly affected genes | Up-regulated | Down-regulated | Number of significantly affected pathways | Number of affected genes in pathways |
|------------|----------------------------------------|--------------|----------------|-------------------------------------------|--------------------------------------|
| SUIT2-luc  | 1348                                   | 825          | 523            | 39                                        | 4 - 29                               |
| GBM 021913 | 5689                                   | 3277         | 2412           | 250                                       | 4 - 180                              |

**Filter criteria:**

**Fold change**                      **>1.5 or < -1.5**  
**P - Value**                              **< 0.05**

**Two significantly affected cell lines were selected for identification of the consensus gene expression signature and commonly affected signaling pathways**

- **Primary human glioblastoma cells** **GBM 021913**
- **Human metastatic pancreatic cancer cell line** **SUIT2-luc**

**Effect of the P-bi-TAT treatment on gene expression**

| <b>Cell line</b>  | <b>Number of significantly affected genes</b> | <b>Up-regulated</b> | <b>Down-regulated</b> | <b>Number of significantly affected pathways</b> | <b>Number of affected genes in pathways</b> |
|-------------------|-----------------------------------------------|---------------------|-----------------------|--------------------------------------------------|---------------------------------------------|
| <b>SUIT2-luc</b>  | <b>1348</b>                                   | <b>825</b>          | <b>523</b>            | <b>39</b>                                        | <b>4 - 29</b>                               |
| <b>GBM 021913</b> | <b>5689</b>                                   | <b>3277</b>         | <b>2412</b>           | <b>250</b>                                       | <b>4 - 180</b>                              |

# **CONSENSUS SET OF 737 GENES AFFECTED BY P-bi-TAT THERAPY**

**Primary human glioblastoma cells**

**GBM 021913**

**Human metastatic pancreatic cancer cell line**

**SUIT2-luc**

## CONSENSUS SET OF 737 GENES AFFECTED BY P-bi-TAT THERAPY

■ GBM P-bi-TAT    — SUIT2 P-bi-TAT

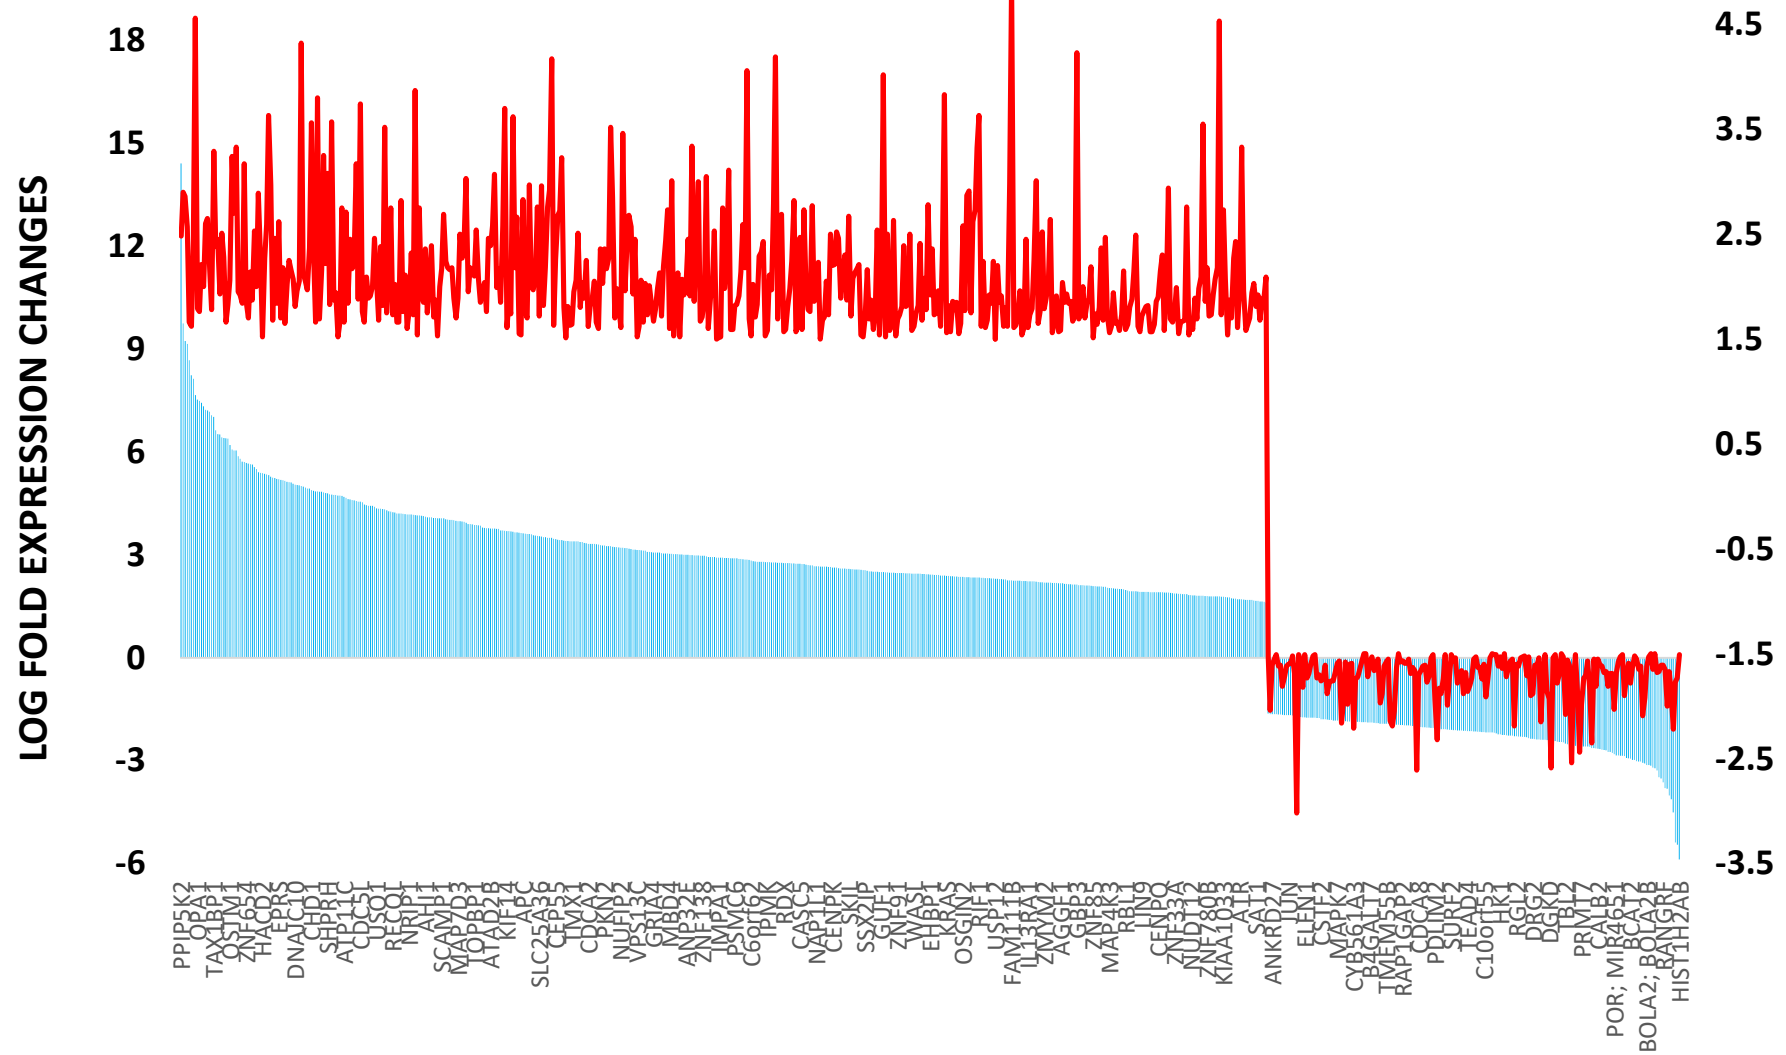

# CONSENSUS SET OF 737 GENES AFFECTED BY P-bi-TAT THERAPY

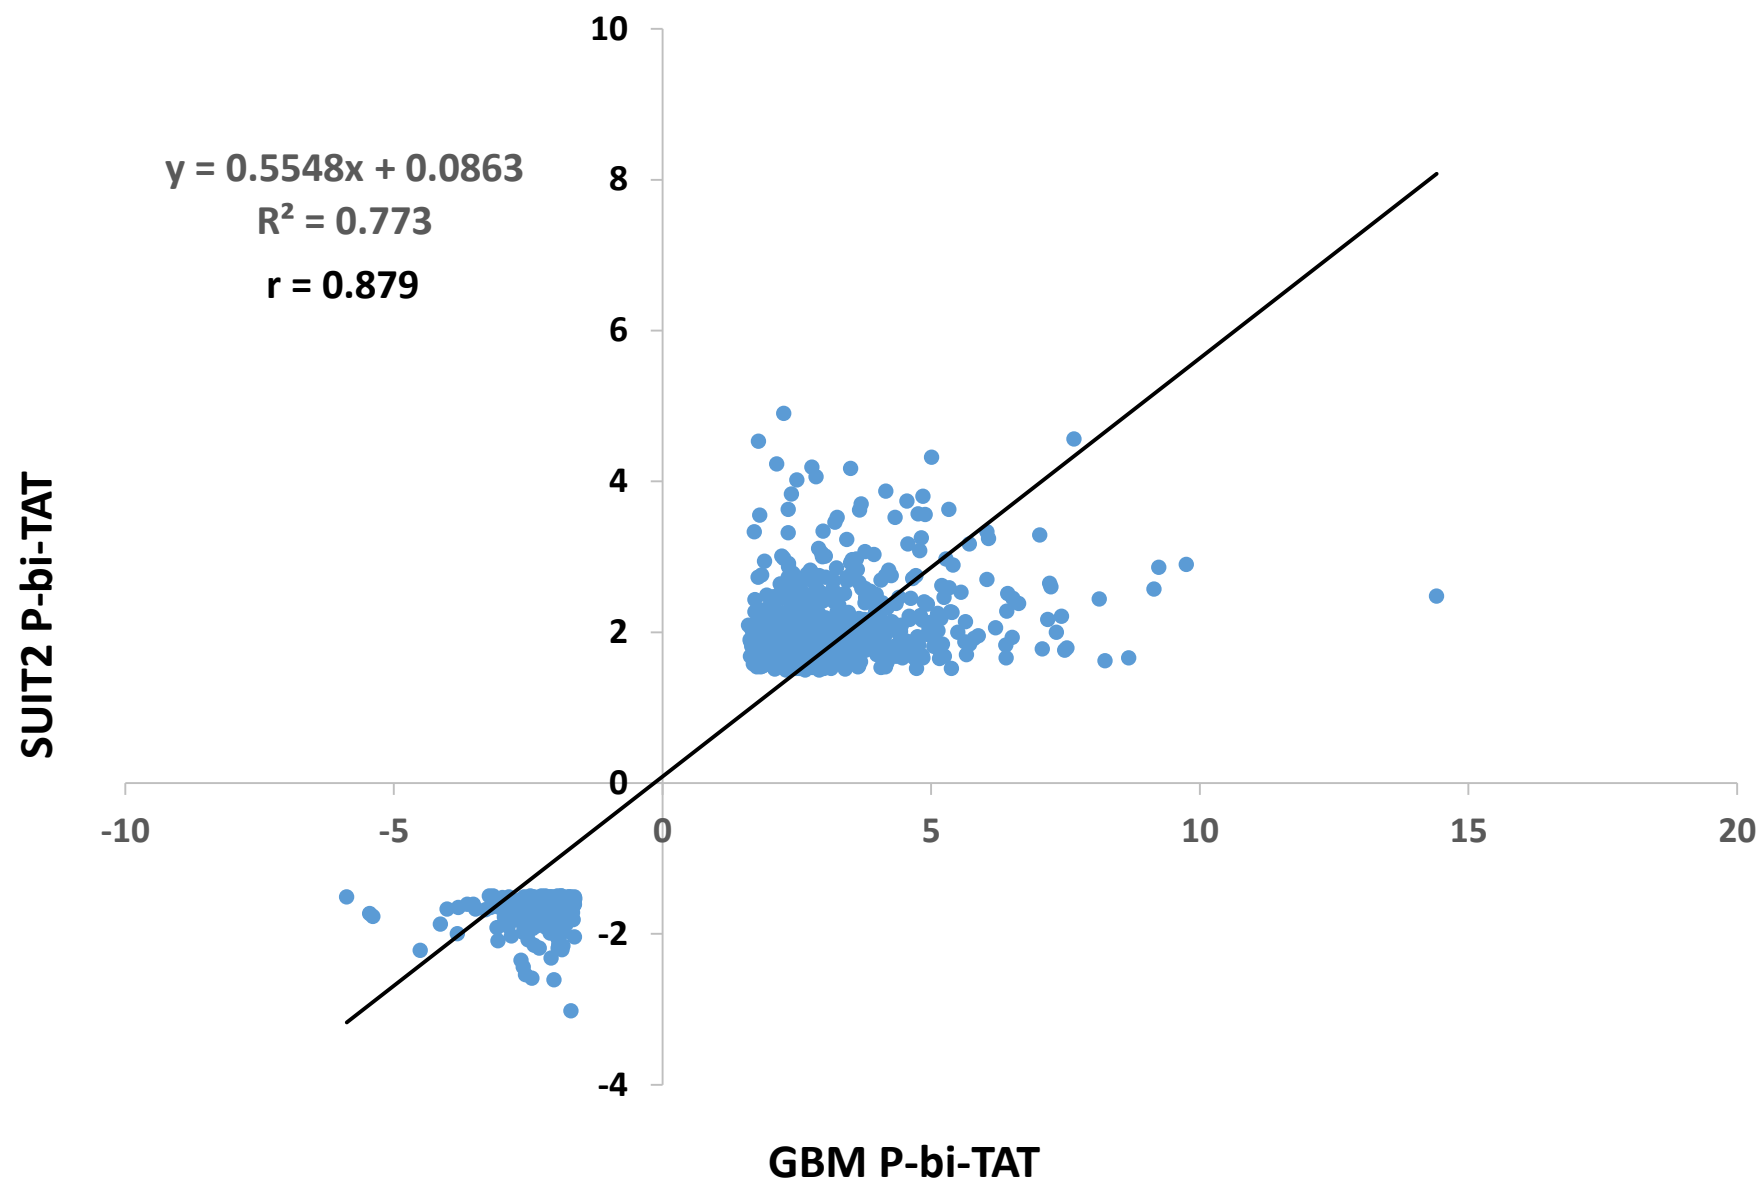

Effect of the P-bi-TAT treatment on gene expression

| Cell line  | Number of significantly affected genes | Up-regulated | Down-regulated | Number of significantly affected pathways | Number of affected genes in pathways |
|------------|----------------------------------------|--------------|----------------|-------------------------------------------|--------------------------------------|
| SUIT2-luc  | 1348                                   | 825          | 523            | 39                                        | 4 - 29                               |
| GBM 021913 | 5689                                   | 3277         | 2412           | 250                                       | 4 - 180                              |

COMMON SIGNALING PATHWAYS

## Effect of the P-bi-TAT treatment on gene expression

### SIXTEEN COMMON PATHWAYS

| Pathway                                                    | Cell line | Up-regulated | Down-regulated | Total genes | p-value  | Cell line | Up-regulated | Down-regulated | Total genes | p-value |
|------------------------------------------------------------|-----------|--------------|----------------|-------------|----------|-----------|--------------|----------------|-------------|---------|
| <b>VEGFA-VEGFR2 Signaling Pathway</b>                      | GBM       | 51           | -34            | 85          | 0.011056 | SUIT2-luc | 14           | -15            | 29          | 0.00245 |
| Androgen receptor signaling pathway                        | GBM       | 28           | -15            | 43          | 0.000046 | SUIT2-luc | 9            | -4             | 13          | 0.00843 |
| Brain-Derived Neurotrophic Factor (BDNF) signaling pathway | GBM       | 36           | -18            | 54          | 0.020347 | SUIT2-luc | 9            | -10            | 19          | 0.00678 |
| <b>Deubiquitination</b>                                    | GBM       | 12           | -1             | 13          | 0        | SUIT2-luc | 4            | 0              | 4           | 0       |
| Endoderm Differentiation                                   | GBM       | 41           | -12            | 53          | 0.025638 | SUIT2-luc | 11           | -6             | 17          | 0.02808 |
| Focal Adhesion                                             | GBM       | 37           | -32            | 69          | 0.011855 | SUIT2-luc | 15           | -9             | 24          | 0.00308 |
| Gastric Cancer Network 2                                   | GBM       | 11           | -4             | 15          | 0.027934 | SUIT2-luc | 7            | 0              | 7           | 0.00467 |
| Human Thyroid Stimulating Hormone (TSH) signaling pathway  | GBM       | 17           | -13            | 30          | 0.002383 | SUIT2-luc | 6            | -4             | 10          | 0.01235 |
| IL-6 signaling pathway                                     | GBM       | 16           | -6             | 22          | 0.001737 | SUIT2-luc | 7            | -2             | 9           | 0.00193 |
| Integrin-mediated Cell Adhesion                            | GBM       | 20           | -20            | 40          | 0.013987 | SUIT2-luc | 9            | -5             | 14          | 0.0085  |
| Interleukin-11 Signaling Pathway                           | GBM       | 17           | -10            | 27          | 0.000004 | SUIT2-luc | 4            | -4             | 8           | 0.00831 |
| MAPK Signaling Pathway                                     | GBM       | 8            | -8             | 16          | 0.002772 | SUIT2-luc | 13           | -8             | 21          | 0.00768 |
| Olfactory receptor activity                                | GBM       | 5            | -42            | 47          | 0        | SUIT2-luc | 1            | -5             | 6           | 4E-06   |
| Signaling of Hepatocyte Growth Factor Receptor             | GBM       | 11           | -5             | 16          | 0.020177 | SUIT2-luc | 3            | -3             | 6           | 0.02432 |
| TCF dependent signaling in response to WNT                 | GBM       | 11           | -3             | 14          | 0        | SUIT2-luc | 4            | -5             | 9           | 0.00539 |
| TGF-beta Signaling Pathway                                 | GBM       | 48           | -13            | 61          | 0.000019 | SUIT2-luc | 12           | -5             | 17          | 0.01388 |

**VEGFA-VEGFR2 Signaling Pathway is the most significantly affected pathway in U87 human glioblastoma cell line as well, suggesting that antiangiogenic effect may represent one of the main biological effects of the P-bi-TAT therapy**



**Effect of the P-bi-TAT treatment on gene expression**

| Cell line  | Number of significantly affected genes | Up-regulated | Down-regulated | Number of significantly affected pathways | Number of affected genes in pathways |
|------------|----------------------------------------|--------------|----------------|-------------------------------------------|--------------------------------------|
| SUIT2-luc  | 1348                                   | 825          | 523            | 39                                        | 4 - 29                               |
| GBM 021913 | 5689                                   | 3277         | 2412           | 250                                       | 4 - 180                              |

**SIGNALING “CHAOS” IN CANCER CELLS**

# MOLECULAR INTERFERENCE MODEL OF THE P-bi-TAT THERAPEUTIC EFFECTS ON HUMAN CANCER CELLS

P-bi-TAT TREATMENT OF HUMAN CANCER CELLS CAUSED MARKED DISRUPTIONS OF EXPRESSION OF THOUSANDS GENES IMPLICATED IN FUNCTIONS OF HUNDREDS SIGNALING PATHWAYS. WITHIN MOST AFFECTED PATHWAYS, THE SIGNIFICANT GENE EXPRESSION CHANGES WERE DOCUMENTED FOR BOTH UP-REGULATED AND DOWN-REGULATED TRANSCRIPTS FOLLOWING THE P-bi-TAT ADMINISTRATION. THESE DATA SUGGEST THAT THE P-bi-TAT TREATMENT CAUSES THE MOLECULAR INTERFERENCE WITH MULTIPLE SIGNILING PATHWAYS, WHICH RESULTS IN AN APARENT SIGNALING “CHAOS” IN CANCER CELLS.

**In contrast to most affected signaling pathways, deubiquitination pathway appears predominantly activated, thus representing one notable exception from this rule. However, activation of the deubiquitination pathway would interfere with normal turnover of proteins, including pathway’s receptors and down-stream signal-transducing molecules, which is required for the proper sustained functions of signaling pathways. Therefore, activation of deubiquitination pathway following the P-bi-TAT treatment would be consistent with the molecular interference model.**

# SIGNALING “CHAOS” IN GLIOBLASTOMA MULTIFORME CELLS

46 pathways (number of affected genes from 21 to 180)

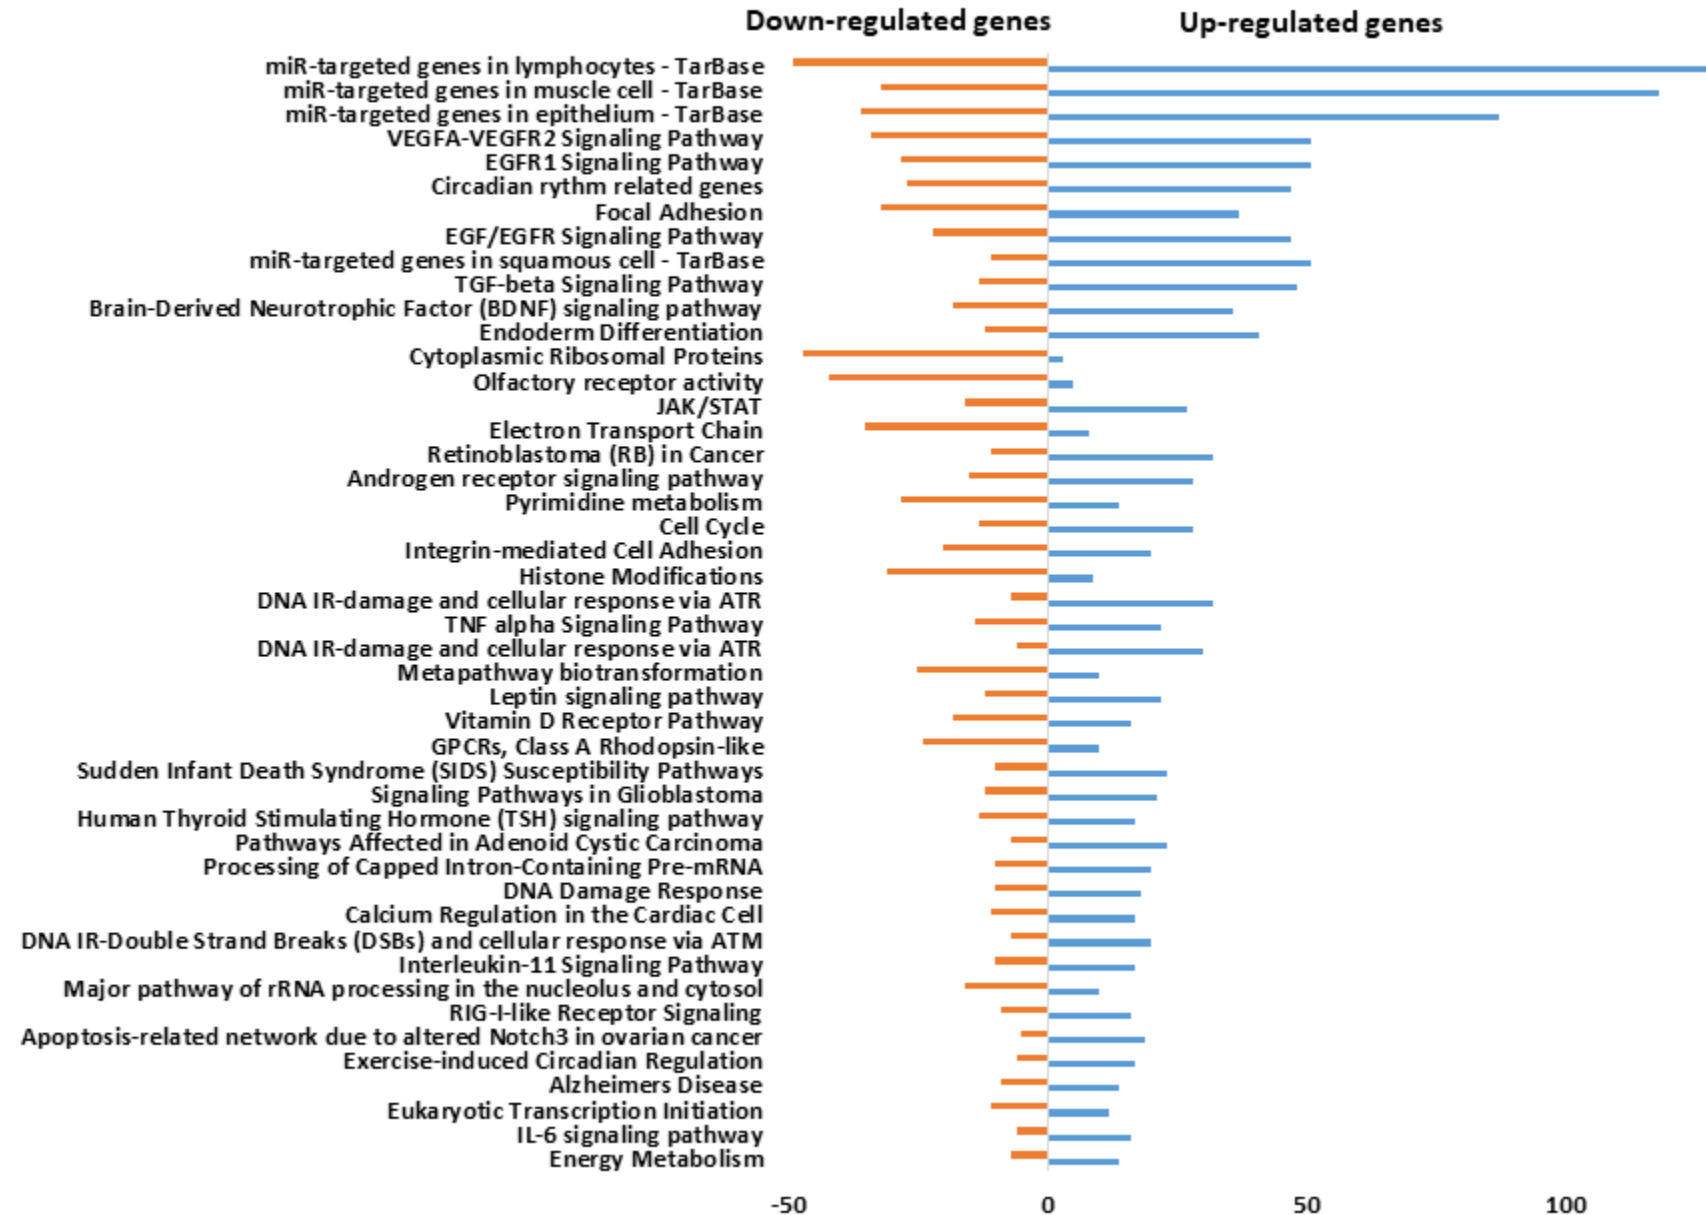

# SIGNALING “CHAOS” IN GLIOBLASTOMA MULTIFORME CELLS

57 pathways (number of affected genes from 10 to 20)

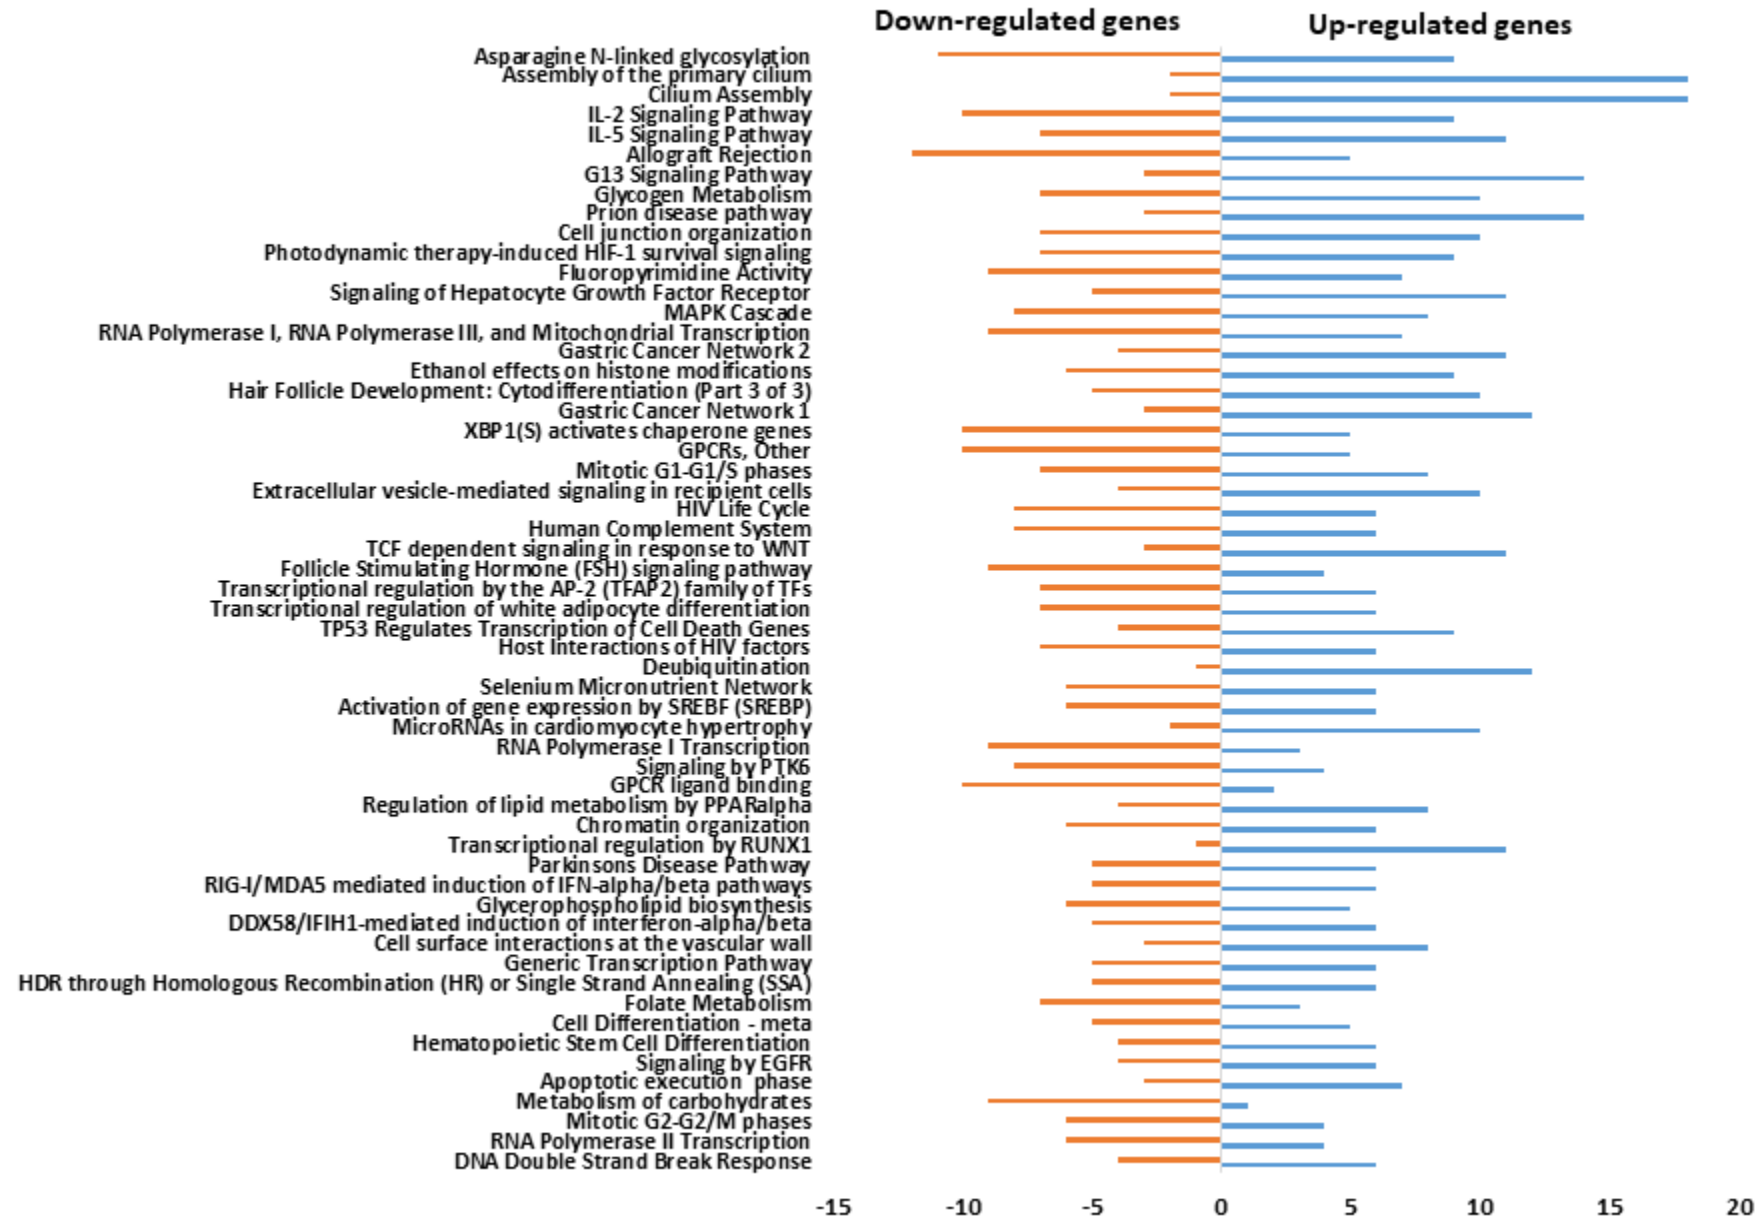

# INTEGRIN CROSSLINKING MODEL OF THE P-bi-TAT THERAPETIC EFFECTS ON HUMAN CANCER CELLS

Integrin's interactions with extracellular matrix proteins facilitate fine 3D placements of integrin molecules embedded within the lipid bilayer of cellular membranes, which is required for integrin's activation and signaling cross-talks with a multitude of specific signaling pathways. We propose that unique features of the molecular structure of the P-bi-TAT allow for the efficient interference with and disruption of these processes by causing, in effect, the “crosslinking” of integrin molecules. It alters dynamics of integrin’s mobility, turnover, and proper 3D placements within the cellular membrane causing the signaling “chaos” in target cells.

**P-bi-TAT**

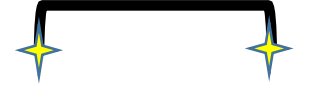

VEGF R2/KDR/FIk-1

VEGF

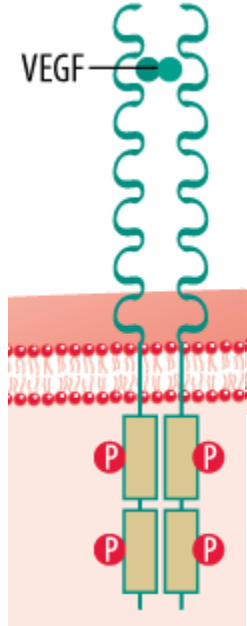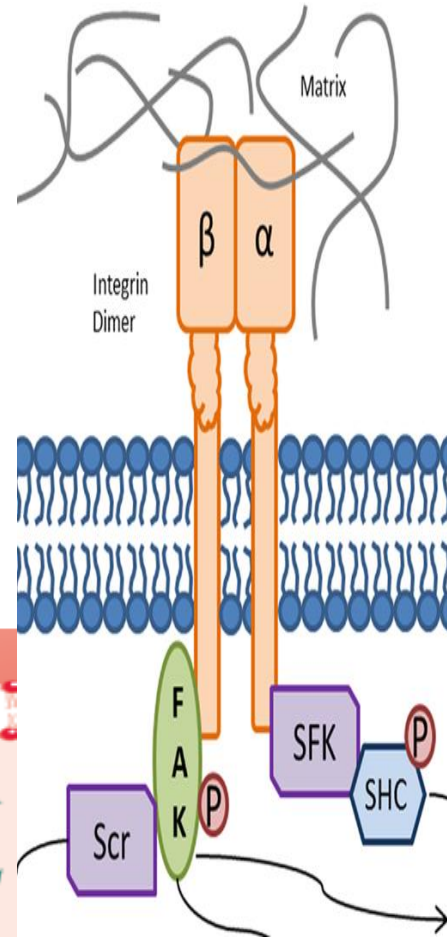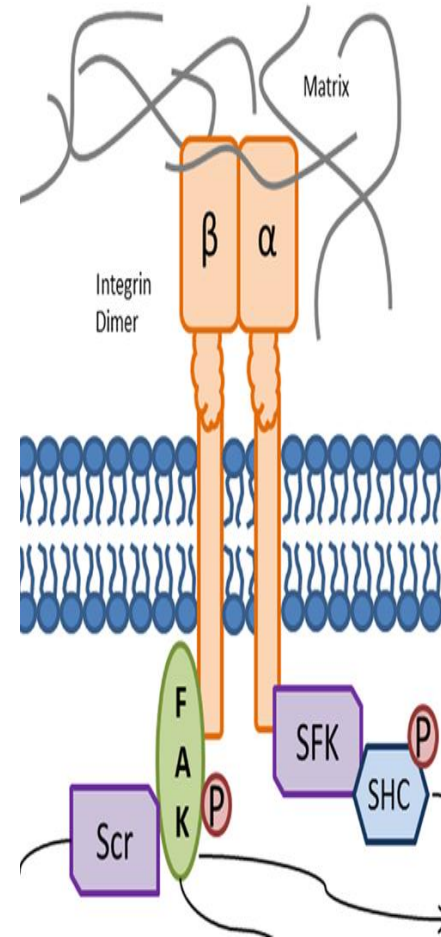

FGF R1

FGF

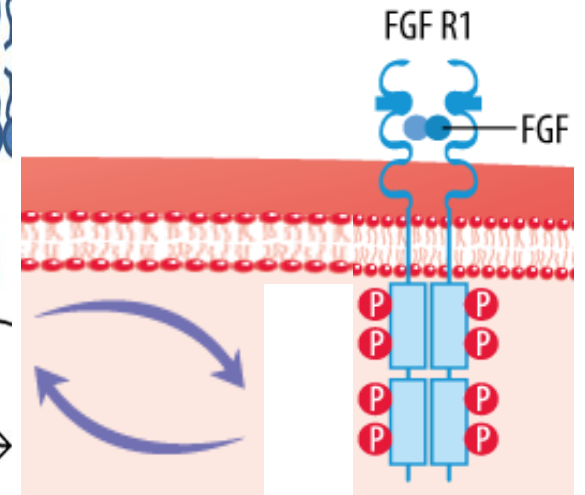

**ANGIOGENESIS**

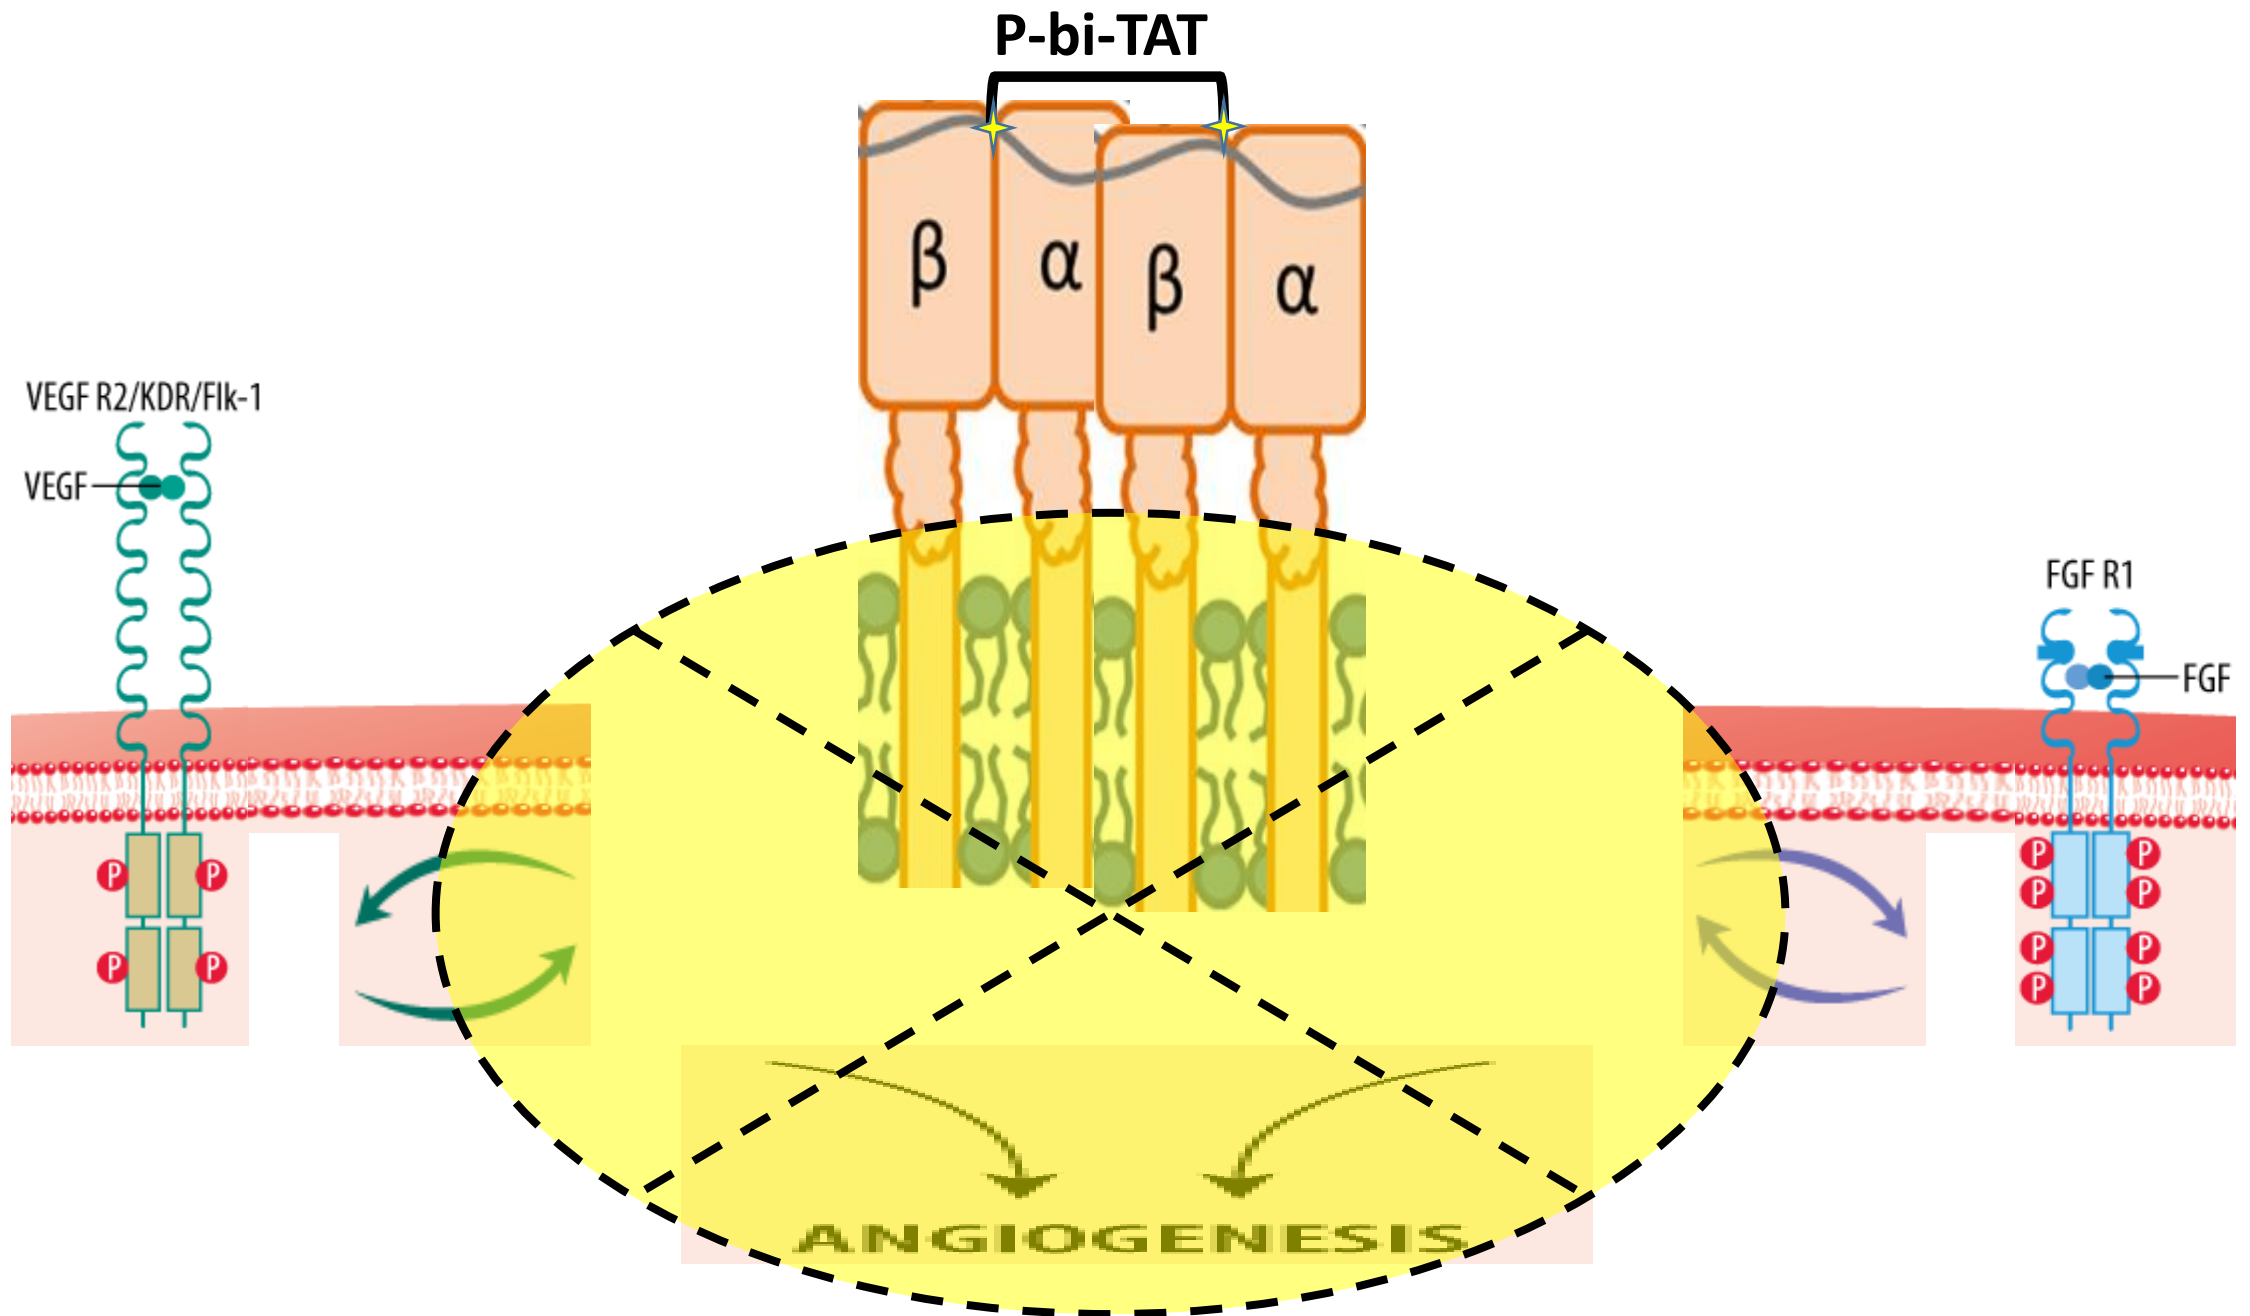

# P-bi-TAT nano-therapeutics

Effect on gene expression in primary human Glioblastoma multiforme (GBM) cells GBM 021913 established as the primary cell line from the patient's tumor

103 pathways significantly affected by treatment with P-bi-TAT for 24 hrs

( $p < 0.05$ ; number of affected genes from 10 to 180)

250 pathways significantly affected by treatment with P-bi-TAT for 24 hrs

( $p < 0.05$ ; number of affected genes from 4 to 180)



# Effect on gene expression in primary human Glioblastoma multiforme (GBM) cells GBM 021913

## treated vs untreated

- treated: 2 samples, untreated: 2 samples

### Filter criteria:

- Fold Change: > 1.5 or < -1.5
- P-val: < 0.05

### Total number of genes: 21448

- Genes passed filter criteria: 5689 (26.52%)
  - Up-Regulated: 3277 (57.6%)
  - Down-Regulated: 2412 (42.4%)

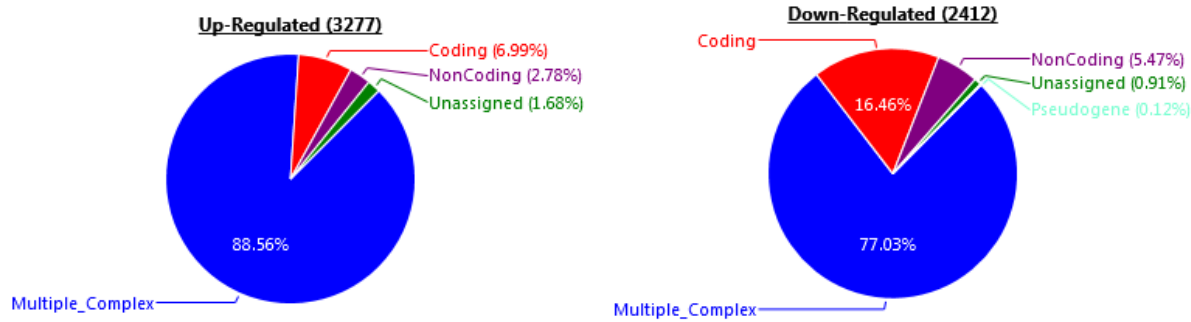

| Group            | Total | Passed Filter | Up-Regulated | Down-Regulated |
|------------------|-------|---------------|--------------|----------------|
| Multiple_Complex | 16081 | 4760          | 2902         | 1858           |
| Coding           | 3878  | 626           | 229          | 397            |
| NonCoding        | 1116  | 223           | 91           | 132            |
| Unassigned       | 352   | 77            | 55           | 22             |
| Pseudogene       | 21    | 3             | 0            | 3              |

## GENE GROUP DEFINITIONS

| Group            | Definition                                                                                                                                                                                           |
|------------------|------------------------------------------------------------------------------------------------------------------------------------------------------------------------------------------------------|
| Multiple_complex | Gene contains more than one locus                                                                                                                                                                    |
| Coding           | Gene contains only protein-coding transcripts                                                                                                                                                        |
| Noncoding        | Gene contains only non-protein-coding transcripts. Most of these are long non-coding genes, but occasionally they may be small non-coding genes where the genetic constitution cannot be determined. |
| Unassigned       | Locus type could not be determined based on source data                                                                                                                                              |
| Pseudogene       | Gene contains only represents pseudogenes (imperfect copy of a gene).                                                                                                                                |

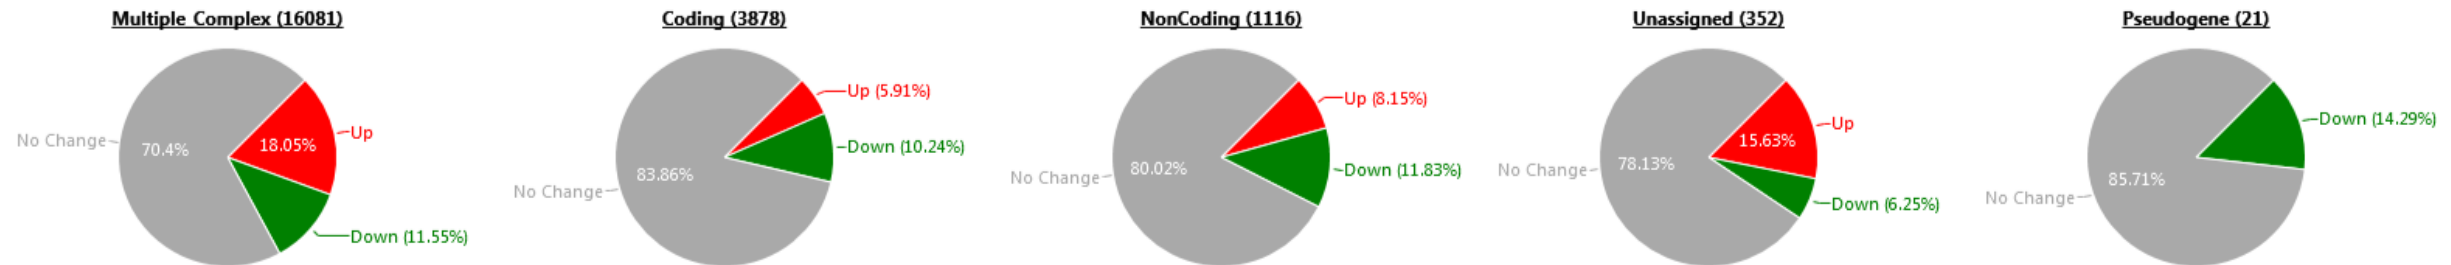

## 46 pathways (number of affected genes from 21 to 180)



## 57 pathways (number of affected genes from 10 to 20)

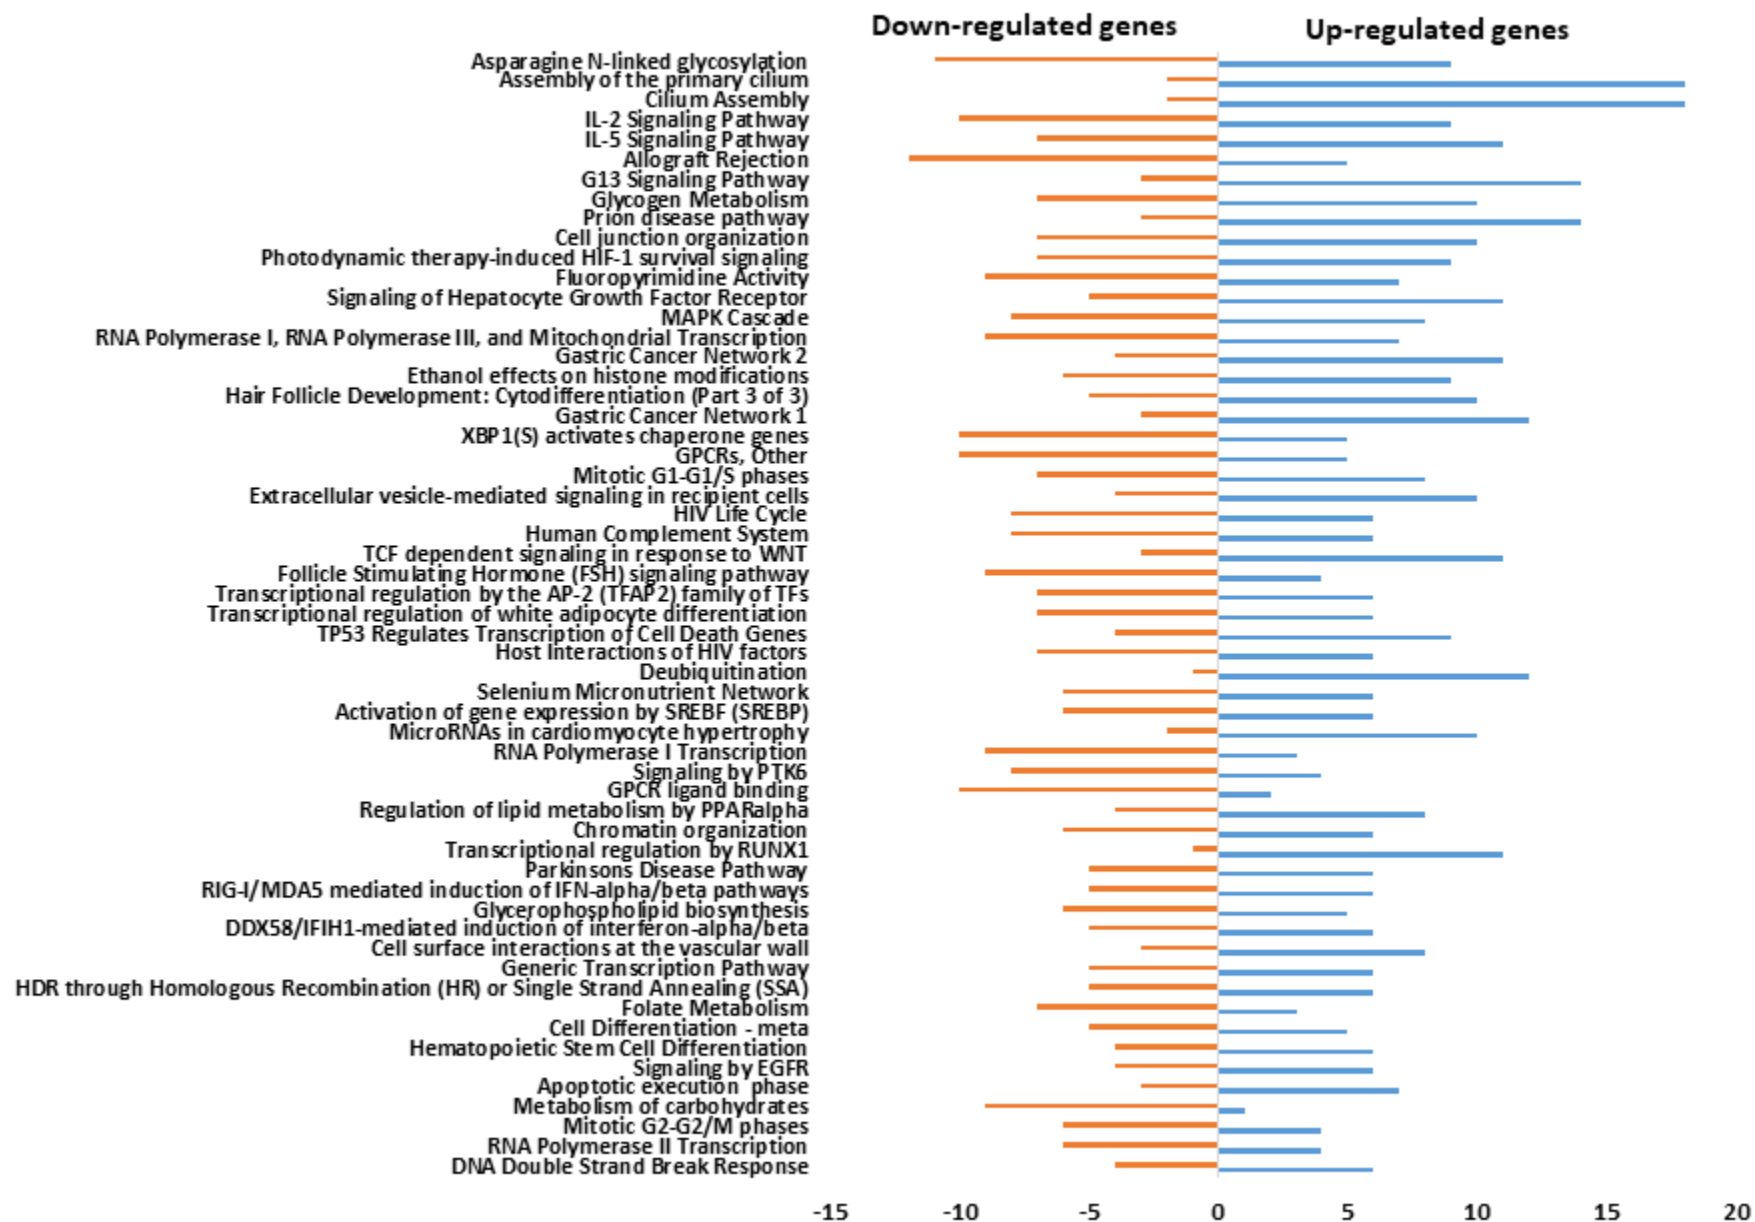

# Effect of the P-bi-TAT treatment on gene expression FGF RECEPTORS' PATHWAYS

| Pathway            | Total genes | Up-regulated | Up List                                | Down-regulated | Down List | Significance | p-value  |
|--------------------|-------------|--------------|----------------------------------------|----------------|-----------|--------------|----------|
| Signaling by FGFR2 | 8           | 6            | FRS2,PTPN11,PIK3R1,PIK3CA,BRAF,HNRNPA1 | 2              | CBL,PTBP1 | 15.96        | 0        |
| Signaling by FGFR3 | 7           | 6            | FRS2,PTPN11,BRAF,PIK3R1,PIK3CA,GALNT3  | 1              | CBL       | 9.88         | 0        |
| Signaling by FGFR1 | 6           | 5            | PTPN11,FRS2,PIK3R1,PIK3CA,BRAF         | 1              | CBL       | 12.34        | 0        |
| Signaling by FGFR4 | 6           | 5            | FRS2,BRAF,PTPN11,PIK3R1,PIK3CA         | 1              | CBL       | 6.15         | 0.000001 |
