# Supplementary material for: Effects of Anticancer Agent P-bi-TAT on Gene Expression Link the Integrin Thyroid Hormone Receptor to Expression of Stemness and Energy Metabolism Genes in Cancer Cells
Source: Preprints.org preprint supplement (doi:10.20944/preprints202203.0125.v1), 2022-03-09
Supplement: Supplementary file 1 [file supplementary]

## Sheet: 3586
135 cells TERTpos iMPC defined by stringent multilineage markers score	Human embryo naive pluripotency precursor cells	P-bi-TAT GBM treatment				Log_Fold change_Naive pluripotency precursor	P-bi-TAT_GBM_Log_Fold-change
VSNL1	3.11314	1.59	0.0366879
SPP1	2.71289	2.32			3586 genes
FGF2	2.62119	2.67			65.4141
FAM124B	2.59795	-1.74			There were 5482 P-bi-TAT trageted DEGs (corrected for multiple enrties for the individual genes)
TDGF1	2.38274	-1.91
TFPI2	2.36715	2.27
CNR2	2.34388	-2.19
TRIB2	2.34301	2.53
BEND4	2.31145	1.75
ETV1	2.21566	2.25
TBC1D16	2.12525	-1.73
CBR3	2.08698	-1.85
ACKR3	2.05842	-1.85
SLFN5	2.02876	1.94
NPHP3-ACAD11	2.01547	2.31
PMEPA1	1.97418	-1.76
PPP1R16B	1.94402	-1.74
SERPINE1	1.94099	-1.85
CNIH3	1.93477	-2.14
ANKRD45	1.89039	1.67
TMEM144	1.88949	3.51
PRUNE2	1.83283	-1.92
KLF7	1.8043	1.87
PRDM1	1.79596	1.77
TMEM98	1.79447	-2.52
SAT1	1.79059	1.66
DPYSL3	1.79017	1.64
GPC4	1.76954	-1.73
SP100	1.7642	3.28
ARMCX5	1.74829	1.73
PDZRN3	1.73449	1.71
SLC30A1	1.72715	3.08
ITGAM	1.71592	-3.06
ATP11AUN	1.68435	-1.85
ZFP30	1.66767	2.74
GGT1	1.62016	1.73
ZNF334	1.60583	3.34
LINC00518	1.59876	-1.79
NNT	1.59396	2.12
HYKK	1.58885	-2.35
UNC5B	1.57372	-2.22
SCRN1	1.57038	2.22
MICB	1.57036	-1.96
SLC48A1	1.57015	1.71
HES4	1.56899	-1.95
ZC3HAV1	1.56888	2.64
RAP1GAP2	1.55577	-1.96
RRAD	1.55078	-1.79
ZC3HAV1L	1.5325	1.93
SLCO1B3	1.521	3
FAM45A	1.51924	2.4
XAGE3	1.50891	-1.62
ANGEL1	1.49476	-1.68
ETV4	1.49412	-3.12
GRB7	1.47509	2.04
GK	1.46458	2.18
RCBTB1	1.46239	2.76
ST5	1.45467	-2.31
C10orf25	1.45461	-1.74
ZNF780B	1.445	1.8
PTRF	1.44431	-1.99
ADD2	1.44349	-1.91
PTGR1	1.44029	2.31
TSPAN13	1.43995	1.74
CHST7	1.43742	-2.37
TCF4	1.43173	3.04
TMEM141	1.42256	-4.21
POU5F1	1.41875	1.99
PLOD2	1.41529	5.29
HOMER1	1.41406	2.42
AKR1B1	1.41019	-1.59
GSTO1	1.40156	-2.23
ARRDC4	1.3997	1.63
PEMT	1.39088	-1.84
ISG20	1.38774	-2.34
CASK	1.38382	2.39
DPY19L1	1.38264	2.96
FLNC	1.3814	-1.88
ALDH2	1.37713	1.8
TBCK	1.37432	2.27
SMAD9	1.36775	2.83
PHKA2	1.36754	-1.94
AGPAT2	1.36193	-1.88
SPRED1	1.35502	1.79
GALK1	1.35294	-1.98
PRAP1	1.35129	-1.77
PYGB	1.35083	-2.12
DZIP3	1.34933	4.82
DAGLA	1.34857	-1.87
RFX5	1.34438	-1.84
ISOC2	1.34393	-2
NXPE3	1.34289	2.51
TRIM22	1.3404	1.81
PTGES	1.3376	-1.63
ATP1B1	1.33538	2.43
TCEAL4	1.33297	2.74
MYADM	1.33217	-2.38
PPP1R14A	1.33043	-1.8
SH3GLB2	1.32531	-1.88
ABCA1	1.32505	2.69
PTGFRN	1.32449	1.73
PHLDA1	1.31968	2.22
SUMF2	1.31967	-2.15
NIPA1	1.3176	1.89
CHMP6	1.3163	-1.91
CD320	1.31613	-2.93
SH3D19	1.31366	2.04
MGAT3	1.30994	-1.99
CNTLN	1.30949	2.7
ALDH3A2	1.30795	2.1
AGTRAP	1.30161	-2.2
GPRC5C	1.30031	-2.53
CENPM	1.29778	-2.85
DPYSL2	1.29625	1.77
C2CD5	1.29554	3.56
REC8	1.29536	-1.86
NBAS	1.29187	1.77
NMNAT2	1.28798	1.77
SYNGR1	1.28614	-1.93
PRPS1	1.28503	-1.69
TFPI	1.28382	3.2
CLCN5	1.28126	1.83
SERPINB6	1.28001	-1.62
GRAMD1A	1.27978	-1.95
ETHE1	1.27691	-2.15
CUEDC2	1.27684	-2.05
NADK2	1.27429	1.92
CECR5	1.27232	-2.57
PLLP	1.26828	-1.92
NRN1	1.26593	2.18
ABCB8	1.26504	-2.23
TRAM1L1	1.2649	1.81
MAN1C1	1.26384	-1.7
WTIP	1.26242	-1.8
FAM102B	1.26162	1.79
ZNF44	1.25893	1.88
GATM	1.25818	1.8
TRIM38	1.25795	1.88
SDCBP	1.25762	2.36
RAB15	1.256	-1.8
GPD2	1.25281	2.98
SPHK1	1.25109	-2.27
CAT	1.249	2.67
GREM2	1.24884	2.5
BIVM	1.24529	2.73
NEK6	1.24243	-1.78
NOC4L	1.24207	-2.04
MIF4GD	1.24043	-1.78
GTPBP2	1.23934	-1.98
KIT	1.23529	-1.85
SLC27A4	1.23508	-1.71
PCMTD2	1.2344	2.72
CNTN6	1.23397	-1.72
TRIQK	1.2326	2.37
NDUFAF3	1.23103	-1.77
TMEM261	1.22734	-2.71
CLUAP1	1.227	2.56
KANK1	1.22446	2.23
KLC3	1.22381	1.99
HDGFRP3	1.22348	2.45
CCDC28B	1.22282	-1.92
TRIM2	1.22066	1.95
ACOT8	1.22058	-2.32
TWF2	1.22032	-1.64
TRPT1	1.21927	-1.9
PSME1	1.21805	-2.89
EXPH5	1.21481	-1.76
CDC42EP4	1.21431	-1.8
OCIAD2	1.2125	-1.84
UGP2	1.20987	3.23
FCHO2	1.20978	2.34
SLC39A10	1.20933	2.83
SLC22A18	1.20871	-1.99
MARVELD1	1.20241	-1.82
CDK5RAP3	1.20164	-2.43
PACSIN3	1.20119	-1.64
ENTPD6	1.20118	-2.75
NEURL4	1.20022	-2.64
WNT5B	1.19781	-1.69
CNIH4	1.19773	-1.62
FAM86C1	1.19209	-1.97
HDAC6	1.19026	-2.51
TMEM182	1.19004	2.02
FAM126A	1.18866	2.25
CTSD	1.18611	1.8
E2F1	1.18589	-2.72
DST	1.1826	7.23
PRDX4	1.18121	-1.64
FANCA	1.17987	-1.81
C16orf59	1.17968	-1.75
LINC00116	1.17829	-2.36
FXYD5	1.17747	-1.74
SP4	1.17649	1.6
IRF9	1.17628	-1.8
RILP	1.17546	-1.87
ENPP1	1.17418	2.79
TRPS1	1.1737	2.24
CDKN3	1.17306	2.54
CREB3	1.17032	-1.95
RAPGEF2	1.17008	3.3
ZBTB14	1.1694	2.12
MAPK3	1.16818	-1.98
IDH1	1.1679	1.65
THAP3	1.16685	-2.5
EPHA2	1.16664	-2.67
PRMT9	1.16651	1.76
SCML1	1.16548	2.8
PUSL1	1.16398	-2.46
TCF19	1.16328	-1.67
PANK3	1.16242	2.26
ZFP69	1.16191	3.07
B4GALT7	1.16184	-1.89
TMEM64	1.16182	3.47
BRF1	1.16073	-2.25
PFKL	1.1605	-1.95
CLTB	1.15925	-2.32
CDK5RAP2	1.15918	1.7
GPCPD1	1.15904	3.55
CAPG	1.15856	-3.91
SCGB3A2	1.15819	-2.12
BOLA3	1.15649	-1.93
SPTBN1	1.15602	2.44
STOM	1.15364	1.78
AGL	1.15316	3.55
CD9	1.15276	2.36
EIF2D	1.15184	-2.19
UBAC2	1.15125	-1.91
MFN2	1.15075	-2.8
ID2	1.14972	2.21
CNP	1.14841	-3.08
ETFB	1.14597	-2.16
SNX7	1.14492	1.76
MTM1	1.14361	2.65
MEIS2	1.1427	3.02
WDR5B	1.14248	3.1
MPI	1.14245	-1.68
ZNF440	1.14217	1.75
SYNGR2	1.14145	-2.62
SCPEP1	1.14125	1.81
TUSC1	1.1407	-1.72
SPECC1L	1.13993	2.65
ID1	1.13873	-2.13
TAX1BP3	1.13669	-1.72
ARFGEF1	1.13606	5.05
ERCC2	1.13586	-3.03
STK16	1.13553	-1.88
RCN2	1.13511	2.18
STRADA	1.1344	-2.08
LY6E	1.13342	-2.07
DOCK1	1.13293	1.85
RELL1	1.13241	2.42
RAP2C	1.13029	2.74
ZC3H12C	1.12939	4.34
SLIT2	1.12922	2.19
JAM3	1.12894	1.76
BSPRY	1.12886	-2.27
MCM3AP-AS1	1.12844	-2.06
DNAJC25	1.12779	2.27
COG6	1.12649	3.05
SHB	1.12566	-1.64
PLK3	1.12563	-2.41
GNG10	1.12556	2.08
SOX2	1.12511	-2.04
DLX6	1.12475	-1.64
WDR11	1.12445	2
ZNF320	1.12415	2.66
MUS81	1.12365	-1.82
RAP1A	1.12263	2.35
GLIPR2	1.1224	-2.11
BTBD1	1.12172	3.38
SPIRE1	1.11959	2.47
AK1	1.11933	-1.68
ATP6AP2	1.11774	3.35
CHPF	1.11767	-2.13
SCAMP1	1.11755	4.07
PI4K2B	1.11741	1.88
SERINC5	1.11729	1.76
SUN2	1.11716	-1.82
UPP1	1.11697	-2.62
PRMT3	1.11666	2.11
ATRAID	1.11214	-2.12
ARFIP1	1.1112	5.8
ZNF257	1.10877	2.13
NBN	1.10828	3.03
NDST1	1.10784	-2.34
SERPINE2	1.10763	2.48
RGCC	1.10675	1.77
C5orf34	1.10601	1.92
CSRNP1	1.10509	-1.92
SLC37A4	1.10451	-1.76
MUL1	1.10436	-2.28
LACTB	1.1043	1.87
NDUFB3	1.10396	-3.02
FLII	1.10317	-1.84
HMGCR	1.10212	2.34
DEPDC1	1.10203	4.09
RAB3GAP1	1.10035	2.45
LARP7	1.10021	2.94
SYK	1.1002	2.25
LYPLAL1	1.09974	1.92
RFXAP	1.09956	2.16
TMEM38B	1.09866	5.18
HS3ST3A1	1.09832	2.8
AAAS	1.09623	-2.6
RYK	1.09562	1.94
MRPS2	1.09541	-1.99
S100A16	1.09422	-3.53
TMED8	1.0941	1.73
GDPGP1	1.09288	-1.92
ARHGAP12	1.09247	3.25
GSTM4	1.09189	-1.72
NT5DC1	1.09154	2.23
CHID1	1.09131	-1.96
MAP3K2	1.09059	5.24
MDFI	1.09058	-2.05
CAB39	1.08864	2.45
GFPT1	1.08697	2.84
RAD51	1.08656	-2.37
MLXIP	1.08517	-1.74
HSPB8	1.0845	3.41
SORT1	1.0844	-1.76
GORASP1	1.08414	-1.65
VARS	1.08361	-2.04
SPTSSA	1.08311	1.9
ST3GAL1	1.08209	-1.83
PAQR3	1.08167	4.11
METAP1D	1.08144	-1.87
SURF1	1.08138	-2.55
JMJD4	1.08126	-2.57
BARD1	1.08122	3.48
NEK4	1.0812	3.16
SLC25A11	1.08094	-2.59
VCAN	1.08086	2.98
PMVK	1.08055	-2.31
NFKBIL1	1.08027	-1.82
LRRC40	1.08009	4.21
SUCLA2	1.0799	2.15
OCLN	1.07911	2.45
SEC63	1.07742	5.32
DOCK6	1.07638	-1.66
UBQLN4	1.07624	-1.82
POLI	1.0757	3.06
HIST1H4I	1.07561	-2.01
GMPPA	1.07499	-1.87
MSH6	1.07433	1.72
PCYOX1	1.07348	3.46
PVR	1.07328	-1.71
IFNAR1	1.07319	2.59
SOS1	1.07267	3.02
DBN1	1.07209	-1.95
ROBO1	1.06994	3.13
PGM1	1.06958	-1.75
COMMD4	1.06954	-2.93
PDE8A	1.06917	3.19
AKAP12	1.069	2.23
CD55	1.06885	1.88
AMACR	1.06803	2.04
ATP11A	1.0676	-1.62
CKB	1.06635	-1.76
TPRA1	1.06626	-1.98
KIFAP3	1.06443	2.18
VPS11	1.06438	-1.93
TMEM106B	1.06418	2.58
CCM2	1.0633	-2.2
USP28	1.06272	1.9
TMEM41A	1.06262	2.01
SEC23A	1.06232	2.75
VPS13C	1.06213	3.14
MLYCD	1.06184	-1.89
C12orf56	1.06098	-2.99
LMAN2L	1.06088	-1.7
NCEH1	1.06023	2.13
WDR1	1.05984	-1.65
PRIMPOL	1.05783	4.27
ZDHHC20	1.05712	4.96
PNPT1	1.0571	2.98
ACTR1B	1.05659	-1.86
OCLM	1.05656	-2.89
SBF2	1.05623	3.14
ARL1	1.05588	2.28
TMED9	1.05433	-1.76
SBSPON	1.05363	-1.9
ATXN10	1.05361	2.04
FBXW5	1.05355	-1.85
UQCC2	1.05341	-2.49
TLCD1	1.05239	-1.98
CEP41	1.05185	-1.71
NMRAL1	1.05125	-1.86
PAPD4	1.04965	2.32
BMPR1A	1.04914	2.54
RBM41	1.04909	2.04
TRAPPC2L	1.04753	-3.19
KLHL25	1.04741	-1.79
SLC38A9	1.04678	1.87
PRNP	1.04675	2.41
SDR39U1	1.04637	-1.98
PDE4D	1.04591	2.2
SNX17	1.04561	-2.15
SAV1	1.04561	1.67
PLIN3	1.04553	-1.75
ZFPL1	1.04411	-2.07
ATP13A3	1.04385	2.76
GNAQ	1.04378	5.51
COQ6	1.0436	-1.97
ITPR2	1.04341	1.79
FUBP3	1.04329	2.18
ANXA11	1.04264	-2.16
AEN	1.04139	-2.06
LHPP	1.04104	-2.14
ZNF32	1.04103	-3.03
C5orf22	1.04095	3.32
NTPCR	1.04087	-2
CAMKK2	1.04045	-3.38
TMC6	1.03999	1.61
SAT2	1.0398	-1.87
CD2AP	1.03923	2.24
GALE	1.03906	-2.19
MMS19	1.03889	-2.62
MAP7D3	1.03879	3.98
KLHL9	1.03818	5.25
TMTC4	1.03803	-1.73
LPGAT1	1.03801	2.62
KATNBL1	1.03799	1.86
SLMAP	1.03767	2.5
ZNF620	1.03766	2
FPGS	1.03766	-3.05
APPL1	1.03733	1.83
DNAJC11	1.03722	-2.2
GPR75	1.03721	1.88
TMBIM4	1.03718	1.94
ATXN3	1.03715	-1.84
ARHGAP1	1.03711	-3.85
C21orf33	1.03684	-2.31
KIAA0232	1.03672	2.81
NDUFA8	1.03574	-1.97
TMEM5	1.03571	1.7
ZNF850	1.03552	4.19
BRMS1L	1.03528	1.65
EEFSEC	1.03468	-2.55
SUCLG2	1.03427	3.02
CLN8	1.03384	1.74
FMNL2	1.03361	1.99
ADRBK1	1.03121	-1.95
CD53	1.03098	1.81
ZBTB21	1.03097	2.18
MYSM1	1.03072	3.78
TBC1D2	1.03068	-2.07
THTPA	1.03019	-2.24
ABCB7	1.02976	1.79
MTIF2	1.02955	3.37
BCOR	1.02954	1.6
EFHD2	1.02952	-3.31
TTC26	1.02932	1.81
SPC24	1.029	-2.12
ASAP3	1.02886	1.67
SLC33A1	1.02841	1.83
NPIPA1	1.02835	2.01
ATP2C1	1.0281	2.83
KDM4C	1.02795	-2.53
RABAC1	1.02742	-1.65
NDUFAB1	1.02471	-2.55
AP1S1	1.02309	-4.01
TMEM65	1.02295	1.6
GFER	1.02276	-2.09
ARFGEF2	1.02276	2.88
APIP	1.02272	-1.82
MAFF	1.0225	-1.64
PMPCA	1.02234	-2.38
LRRC34	1.02192	1.75
OTULIN	1.02187	2.16
FEM1B	1.02038	4.15
ITGB5	1.02007	-2.56
TTC19	1.01976	2.85
SLC29A1	1.01951	-2.28
ATP8B1	1.01904	-1.75
FERMT2	1.01901	2.07
BAX	1.01824	-1.68
CLN6	1.01717	-1.69
SENP2	1.01699	2.97
TMEM128	1.01669	1.79
HMBS	1.01561	-2.98
HPS6	1.01542	-2.28
NDUFV1	1.01539	-3.47
ATP5G2	1.01497	-1.9
SPIN1	1.01484	2.62
ASB1	1.01467	-2.18
BLOC1S1	1.01438	-1.89
ABHD17B	1.01403	1.91
CCNDBP1	1.01387	1.87
DCBLD2	1.01363	2.89
GPNMB	1.01343	-1.83
ZMAT3	1.01308	3
PWP2	1.01283	-2.39
SLC35B3	1.01261	2.24
TK1	1.01259	-3.16
DTWD1	1.01231	1.92
HSP90B1	1.01207	1.73
MIPEP	1.01161	-1.91
FKBP14	1.01088	2.27
PTPN12	1.01075	1.77
NARFL	1.01029	-2.89
OGFRL1	1.00928	2.37
C17orf62	1.00911	-2.25
GCLM	1.00886	1.99
MTX1	1.00842	-2.37
SMUG1	1.00739	-3.2
SEPW1	1.00735	-2.43
ASPH	1.00722	2.27
ATP6V1A	1.00689	1.94
CENPV	1.00612	-2.51
MAN2C1	1.00603	-2.47
ADCK1	1.00595	-2.2
ZNF486	1.00576	4.18
ABCB10	1.00496	1.95
APEH	1.00462	-1.84
CLTC	1.00416	4.08
MRPL48	1.00408	-3.26
CDAN1	1.00388	-1.65
NEK7	1.00369	4.47
DCLRE1A	1.00362	3.68
FAM92A1	1.00356	2.47
CLPTM1	1.00324	-1.78
MRPL15	1.003	-1.89
ZDHHC12	1.00282	-1.68
EIF2AK4	1.00249	2.23
CTSF	1.00201	-2.56
DEF8	1.00143	-2.08
RGS10	1.00129	-1.65
RBM23	1.00113	-1.83
FIG4	1.00113	2.6
CACHD1	1.00109	2.34
PKMYT1	1.00102	-2.01
SPINT2	1.0007	-2.21
ERBB2IP	1.00052	2.8
TEX264	0.99983	-2.17
METTL2A	0.999119	-1.93
PAFAH2	0.998472	1.63
GTF2H5	0.998468	-2.22
XPNPEP1	0.99813	-1.81
IMPAD1	0.997687	2.59
MVD	0.997185	-1.76
NDUFB5	0.996852	1.93
MRPS16	0.996362	-1.78
GSS	0.996317	-1.95
LIG3	0.99623	-1.84
SLC19A1	0.995642	-2.07
ZNF112	0.995503	2.02
IGF2R	0.995499	2.08
MTG1	0.99536	-1.68
NDC1	0.994657	1.88
ATL3	0.994409	1.75
OXR1	0.994368	2.71
SENP8	0.994235	1.74
VPS25	0.994078	-3.46
PITPNC1	0.993898	-1.78
ZBTB2	0.993888	2.3
MYBL2	0.993867	-2.82
CCDC109B	0.993728	1.66
AP2M1	0.993483	-1.84
CAMSAP2	0.992983	5.72
ILK	0.992827	-2.39
ANKRD28	0.992368	3.17
VPS26B	0.992272	-1.73
SNAPC3	0.992138	1.8
SCAMP2	0.992043	-2.09
TRAM1	0.99149	2.76
ABCC4	0.991247	2.49
FKBP15	0.990768	-2.08
COX11	0.99063	1.82
MECR	0.990373	-2.14
ZC3H7A	0.990371	1.71
GMPPB	0.990189	-2.02
MYO9A	0.990092	-2.8
FOXRED1	0.989269	-2.11
ASUN	0.988533	5.04
SDHD	0.988523	2.84
NT5C	0.988388	-2.99
SPTLC1	0.988172	2.92
GALT	0.987431	-1.7
SAMM50	0.987264	-1.98
IREB2	0.987169	4.01
CPSF3	0.987111	1.94
MAP1B	0.986863	3.67
LIN37	0.986776	-1.92
TRIM46	0.986199	-1.98
HS2ST1	0.985852	3.32
NCOA4	0.985808	2.65
DPH6	0.985749	2.44
COX20	0.985678	1.7
FLNA	0.985384	-6.69
GPR176	0.985313	-1.92
STAM2	0.984734	2.17
RAB28	0.984441	2.08
ARAP1	0.984418	-2.34
TM9SF3	0.984389	3.16
HTT	0.984029	1.69
NSUN5	0.98396	-2.63
FBXO6	0.983511	-2.05
LIMK1	0.982704	-6.52
TSPAN6	0.982601	2.19
DDX1	0.98251	2.05
VPS18	0.982454	-2.13
HINT3	0.981594	3.68
DAZAP1	0.98157	-1.8
PGRMC1	0.981416	1.92
SCP2	0.980634	3.57
RHOQ	0.980616	2.51
STXBP5	0.980375	2.91
UBA6	0.980015	5.03
SLK	0.979862	5.01
ZNF585A	0.9798	1.85
MCM8	0.979434	5.63
PERP	0.979371	2.34
CYP51A1	0.979256	2.14
B2M	0.979223	2.34
ABHD15	0.978591	-2.18
PTER	0.978488	2.77
PDCD6IP	0.97844	2.02
TPM2	0.978421	-2.42
TMEM222	0.978413	-1.98
NUCKS1	0.97834	2.54
ALG6	0.977919	2.4
APRT	0.977779	-2.46
MTMR6	0.9771	3.14
NF2	0.976256	-1.75
CDCA3	0.975384	-2.45
MBD3	0.975242	-1.99
IPMK	0.974815	2.79
ZNF780A	0.974796	1.82
KIFC1	0.974565	-1.92
POLD2	0.974502	-2.72
RPN2	0.974006	1.62
ALKBH7	0.973905	-2.19
MIIP	0.973516	-1.95
CHAC2	0.973287	2.05
FLOT2	0.973246	-2.36
CAMK2N1	0.972904	-1.58
PSENEN	0.972729	-1.88
IARS2	0.972523	1.77
PKIG	0.972059	-1.93
ATL2	0.971769	1.99
PPP5C	0.971671	-1.76
ZNF14	0.971451	1.79
ALG3	0.97141	-1.59
SLX4IP	0.971306	1.75
MRPS35	0.971285	2.12
TBCCD1	0.971258	-1.76
RECK	0.971217	2.4
REXO4	0.971132	-1.79
SLAIN2	0.970451	2.97
RC3H2	0.97024	3.77
CIAO1	0.969846	-1.97
TRAPPC11	0.969816	6.52
TOM1	0.968885	-2.38
IFRD1	0.968189	1.86
PLCD3	0.968088	-1.79
LAMTOR2	0.968055	-1.84
ZYG11B	0.968025	4.16
ARHGEF26	0.968006	1.9
GMEB2	0.967789	-2.26
MRPS18A	0.967604	-1.96
ARFGAP2	0.967366	-2.88
ZNF532	0.967331	1.72
ANXA6	0.9671	-1.75
SNAPC5	0.966875	2.66
ZNF430	0.966695	1.67
ELL	0.966317	-2.36
FASTKD1	0.966169	3.25
RSPRY1	0.966126	1.73
ERMP1	0.966023	1.8
FAHD2A	0.965893	-1.98
PIGK	0.96578	3.38
FAM229B	0.965732	-3.06
WASL	0.965643	2.45
SLC35A3	0.965146	4.59
TCAIM	0.964912	2.14
CHUK	0.964358	2.62
TBC1D8	0.9642	2.23
HSPA4L	0.964167	3.12
NDUFS2	0.964079	-2.06
ZNF235	0.963827	1.61
JAK1	0.963531	4.43
PREB	0.96348	-1.85
SMPDL3A	0.963437	1.8
TMEM87B	0.963399	2.42
TET2	0.963281	2.35
RANBP2	0.963262	1.8
FABP5	0.962975	-2.03
VEZT	0.962813	2.35
ACTB	0.962779	-2.27
TGFBR1	0.962592	3.08
SLC30A9	0.962125	6.71
ATP6V0B	0.962043	-1.95
ERCC1	0.961966	-3.2
ZNF85	0.961888	2.09
SMARCD2	0.96171	-2.11
EIF4EBP1	0.961521	-5.96
MAP3K1	0.961075	2.89
NFXL1	0.961038	1.83
NADSYN1	0.961033	-2.2
CEP131	0.960427	2.08
RHOC	0.959662	-1.9
PHC1	0.958793	1.76
SH2B3	0.958638	1.6
UBR3	0.958504	7.38
SCRN3	0.958106	2.11
TEAD4	0.957667	-2.14
GUF1	0.957624	2.5
DRAP1	0.957507	-2.17
PFAS	0.957348	-2.7
ACSL3	0.957031	4.02
GRN	0.956869	-3.38
PTBP3	0.956787	2.98
FAM96A	0.956777	1.97
CEP192	0.956458	2.67
DPY19L3	0.956204	2.41
ARRB1	0.955938	-2.28
IRAK4	0.955717	3.38
MUM1	0.955477	-2.17
AK2	0.955332	-1.99
NCOA7	0.955188	4.23
HSD17B12	0.954906	2.78
RUVBL2	0.954793	-2.69
TCEA1	0.954559	3.12
SPNS1	0.954459	-1.77
VPS35	0.953302	2.96
EIF2B4	0.953107	-2.4
PPP2R1B	0.95289	1.81
ARL2	0.952229	-2.11
MBOAT2	0.952226	2.65
KIAA0586	0.952204	2.92
HSPE1	0.95217	-1.6
ZNF121	0.951968	2.82
HUS1	0.951877	2.01
TRAF7	0.951665	-3.08
HLTF	0.951418	2.86
UBXN6	0.951117	-2.21
NUP188	0.950514	-1.75
LPP	0.95051	1.89
LPIN2	0.949838	1.71
MDK	0.949559	-1.64
MCM4	0.949481	1.92
CCNA2	0.949421	2.85
RPS6KB2	0.949325	-1.86
USO1	0.948966	4.36
PDHX	0.94843	2.3
GINS2	0.948156	-3.52
PSME4	0.948038	6.79
MLLT1	0.947785	-2.19
PEX5	0.947601	-2.58
DNAJC16	0.947426	2.61
TUBGCP2	0.947384	-1.82
POLE2	0.946938	2.2
GPR180	0.946914	2.57
RHOF	0.946769	-1.89
TRIM44	0.946613	2.19
FBXO8	0.946436	1.77
NGLY1	0.946029	1.77
NOC2L	0.945837	-2.27
RPS6KA1	0.945711	-2.29
USP9X	0.945703	6.1
TMED3	0.945602	-2.14
PAWR	0.945548	1.95
PIN1	0.945247	-2.45
SMG9	0.945197	-2.03
SYDE2	0.945143	2.08
TSSC1	0.944993	-1.8
POLR2J3	0.944191	-2.27
CLIC4	0.94411	3.32
SAR1B	0.943935	2.51
ZNF790	0.943714	2.24
TM9SF2	0.943634	1.89
AP1B1	0.943477	-2.03
TPI1	0.943365	-1.77
NDUFS7	0.943315	-1.91
IBTK	0.943069	5.5
TMEM205	0.94296	-1.91
SLC30A6	0.942802	2.63
SMIM19	0.942671	-1.61
PLAA	0.942	3.31
LIN7C	0.941814	5.27
MPDU1	0.94167	-2.98
MAP4K3	0.941571	2.03
HNRNPK	0.94144	3.6
CARHSP1	0.941217	-2.53
MICAL1	0.94121	-2
HSPA4	0.940659	2.78
HN1L	0.940576	-2.11
HAX1	0.940467	-2.27
DSG2	0.940253	2.38
RHOG	0.939934	-1.67
USP24	0.939896	7.49
CASC4	0.939838	3.07
CDADC1	0.939832	2.01
ZFAND1	0.939736	4.01
SGTA	0.939735	-2.71
ATP6V1G1	0.939417	1.75
ITFG1	0.939274	1.84
PHKB	0.939182	2.02
ST6GAL1	0.939139	-1.7
GARS	0.93903	2.6
RPS27	0.938711	-2.48
ZNF274	0.93832	-1.79
PRDX3	0.938214	1.83
ENOPH1	0.937736	1.98
HK1	0.937626	-2.23
CCDC120	0.937088	1.63
PRMT7	0.936749	-2.59
RAB35	0.936666	-2.6
ZNF788	0.93649	2.09
TERF1	0.936213	1.9
GTF3C3	0.935569	1.84
WWC2	0.935235	4.3
BLOC1S2	0.934518	2.83
PFN2	0.934508	1.82
DLD	0.934453	4.2
NDUFAF6	0.933997	1.85
FBXO3	0.933927	2.12
MYH9	0.933741	-1.84
MRPL40	0.933344	-1.61
EXOC1	0.93329	3.1
NCAPH2	0.93325	-2.23
SPG20	0.933188	2.31
MAGT1	0.933058	3.83
DSCC1	0.933038	2.43
GTF2H3	0.932969	1.85
KLHL5	0.932896	2.54
CPD	0.932774	7.43
DARS	0.932727	3.45
ARHGEF18	0.932704	-2.02
AMMECR1	0.932698	2.73
RFNG	0.932694	-1.87
SMC1A	0.932074	1.88
UXS1	0.931775	1.74
COLEC12	0.931743	1.84
CAMSAP1	0.931672	1.64
ATP5I	0.931385	-3.42
MRPL4	0.931362	-3.76
NDUFV2	0.931257	-1.81
UBLCP1	0.930763	2.98
NSL1	0.930477	2.49
CADM1	0.930244	1.76
ATPAF2	0.929732	-1.83
VPS28	0.929702	-2.31
TMEM120A	0.929695	-2.03
MAD2L2	0.929663	-3.03
YARS	0.929634	-1.68
CHCHD10	0.929442	-1.79
EDEM3	0.929072	4.36
KRT18	0.929029	-5.49
PDZD11	0.928963	-1.81
GTF3C5	0.928133	-2.01
PDXK	0.928121	-2.6
IPO5	0.927605	1.79
IL6ST	0.92732	5.41
DNAJC21	0.927234	2.17
TXLNA	0.92721	-1.67
TIMM17B	0.926944	-1.89
DPY19L4	0.926533	4.63
UBL4A	0.926439	-1.98
FRMD6	0.926378	2.07
ERI2	0.926364	2.65
UBR2	0.925814	4.53
FRAS1	0.925709	1.85
JUNB	0.925691	-1.69
MAP1S	0.925578	-2.18
RABGGTB	0.924588	2.87
WDR4	0.924558	-2.73
GPI	0.924292	-1.95
HSPD1	0.924184	2.37
ARHGEF2	0.923832	-1.92
APP	0.923797	1.87
RINL	0.923614	-2.11
PCGF2	0.923487	-1.63
ULK3	0.92316	-2.7
MRPL57	0.923098	-2.03
MIEN1	0.923056	-1.6
TOPBP1	0.922249	3.87
WDR33	0.922212	1.58
RUFY3	0.921978	2.29
EMC1	0.921753	1.67
RAB14	0.921455	1.88
MKKS	0.921411	2
TIMM10	0.921391	-2.44
IPO4	0.921133	-1.75
KPNA4	0.921047	2.63
LSM5	0.921039	1.79
CCNF	0.921032	-2.31
GART	0.920964	-1.97
RBPJ	0.920864	4.12
SNX4	0.920781	3.36
GNA13	0.920725	3.12
YIF1A	0.920136	-2.43
GSTZ1	0.92004	-2.04
TAOK2	0.919319	-1.71
RNPEP	0.919263	-1.72
SUCLG1	0.919218	-1.87
PYGO1	0.919168	2.47
GPX1	0.919034	-1.97
C18orf54	0.918936	2.67
SKIL	0.918741	2.59
JMJD1C	0.918278	3.94
CCT7	0.918219	-2.83
MRPL12	0.918208	-3.42
CAPZA2	0.917796	2.22
DOLPP1	0.917763	-1.72
SLC25A1	0.917456	-2.31
UBE2I	0.917406	-1.65
HERC1	0.917167	2.05
BANP	0.917122	-2.21
DDOST	0.916783	-1.75
PABPC3	0.916688	1.76
UROS	0.91665	-1.75
COX7A2	0.915934	-3.42
RBM14	0.915892	-2.33
ZNF567	0.91587	3.31
POC5	0.915478	4.19
CAPN1	0.915471	-2.05
DENR	0.91538	2.11
YIF1B	0.91511	-1.68
AKR1A1	0.915093	-3.13
EBAG9	0.91478	2.64
POLR2I	0.914723	-1.75
SYPL1	0.914641	2.43
CCT3	0.914199	-2.22
YIPF4	0.913768	2.7
CMTR1	0.912561	-1.83
UBA2	0.912483	1.87
NKRF	0.91247	2.38
GEMIN4	0.912455	-2.74
FAM98A	0.912381	1.89
PDS5A	0.912229	4.8
AGAP3	0.912015	-2.14
GBAS	0.911903	1.95
NTMT1	0.91152	-2.71
RANGAP1	0.911267	-2.31
LYRM5	0.9111	-2.01
PYCARD	0.910959	-1.83
ARSK	0.910613	1.77
GFM1	0.910396	1.8
PLAC8	0.910235	1.81
NR1H2	0.910117	-2.98
GOLIM4	0.909981	2.91
CNNM3	0.909905	-1.77
ZBTB41	0.909753	2.15
ZNF608	0.9095	2.1
PDCD5	0.909316	-1.76
FIS1	0.90931	-2.92
RPL39L	0.909292	-3.41
AGTPBP1	0.909271	1.62
ARPC4	0.908728	-2.91
BCAS2	0.908487	3
CCHCR1	0.908404	-1.79
PLEC	0.908321	-2.15
TTC37	0.908311	6.49
COMMD7	0.908185	-2.43
ZNF729	0.908109	-2.58
NCOA3	0.907432	3.03
SMPD4	0.90731	-1.8
UBL3	0.9073	3.32
SCRIB	0.90669	-1.7
PPP1CB	0.906343	4.44
PPTC7	0.906155	1.72
SEC22B	0.906101	1.86
CSTF2	0.906022	-1.79
CTBP2	0.905927	3.35
MCM5	0.905023	-1.95
DCTN2	0.904871	-1.69
ZNF428	0.904643	-1.71
MRPL13	0.904518	1.74
EPB41L5	0.904154	2.09
STT3B	0.904	3.37
TACC3	0.903917	-1.63
ERICH2	0.903598	-2.12
DNAJC3	0.90359	2.91
MAN2A1	0.903125	5.36
NMRK1	0.903077	2.45
CC2D1A	0.902881	-2
BCAP31	0.902675	-1.97
VPS33A	0.902498	-1.91
TAF10	0.90214	-1.94
CNN2	0.902033	-1.67
SWI5	0.901787	-1.97
CYB561A3	0.901279	-1.87
TSPAN14	0.90116	-2.08
ABL2	0.901007	1.72
LAMC1	0.900976	1.64
GGH	0.900798	3.4
ERLEC1	0.900717	1.68
FAM120AOS	0.900546	-2.55
BCL7B	0.900363	-2.22
NCOA1	0.900286	1.85
TUBB4B	0.900248	-1.68
TP53I3	0.900211	-2.08
DHCR7	0.900119	-2.19
PFKM	0.900033	-1.83
CIB1	0.899884	-5.45
PSMG1	0.899823	-1.62
ARL6IP4	0.899816	-3.18
BRAF	0.899512	1.93
SERTAD2	0.899479	2.51
C6orf136	0.899244	-1.74
YWHAZ	0.899123	1.78
PPP2R1A	0.898751	-2.02
PHF20L1	0.898497	2.47
TOM1L1	0.898	2.1
WDR54	0.897862	-2.63
MFSD1	0.897859	2.85
SMIM8	0.897698	-1.89
ESCO1	0.897651	2.08
ADCK2	0.897245	-2
EIF4E	0.897177	2.66
AASDHPPT	0.896947	2.27
THAP9-AS1	0.896844	1.95
TMEM223	0.896688	-1.79
E2F4	0.896135	-1.88
PGLS	0.896126	-2.42
TRIM24	0.895759	2.66
RBBP4	0.895659	2.08
ABHD10	0.895653	2.81
XPO1	0.895388	2.42
ATAD3B	0.895359	-1.76
CCS	0.894628	-1.67
ACTR3	0.894563	2.42
ZBTB26	0.89436	2.29
TARS	0.894233	3.75
DUSP23	0.893804	-2.42
NFIL3	0.893611	1.78
ANXA7	0.893373	2.64
U2AF1L4	0.893341	-1.89
ZNF283	0.892747	3.44
UFM1	0.892452	2.15
ATP5A1	0.892142	-3.02
CEP350	0.891767	2.34
RAI14	0.891582	2.39
WDR44	0.891494	4.23
ZFP64	0.890355	-1.72
EXOC8	0.890248	2.27
ZNF507	0.890157	4.63
TOMM70A	0.889945	2.36
MEF2A	0.889798	3.28
SETDB1	0.889762	-2.19
TEX261	0.889728	-1.89
BSG	0.889645	-1.98
DNM2	0.889618	-1.95
CCDC93	0.889153	2.6
NCKAP1	0.88913	6.7
KXD1	0.889035	-1.91
C5orf15	0.889013	3.14
ZNF17	0.888734	3.16
ATG4C	0.888651	2.35
SMARCAD1	0.888579	4.33
NDUFS4	0.88836	1.67
DDX41	0.887969	-2.42
ANKIB1	0.887948	5.66
NUP54	0.887859	1.74
DHX36	0.887629	4.72
FASTKD2	0.88703	4.2
RNF40	0.887013	-1.77
UCHL5	0.886808	1.91
CSE1L	0.886149	4.23
USF1	0.885931	-2.07
ZMPSTE24	0.885897	3.61
MCM7	0.885734	-2.53
MELK	0.885459	2.18
ITM2B	0.885185	1.8
ZNF91	0.885154	2.47
AVL9	0.885088	2.36
USP5	0.884655	-1.9
FAT1	0.884473	2.89
DESI2	0.884284	2.48
ARFIP2	0.884263	-2.25
ERBB2	0.884117	-1.93
RCC2	0.884078	1.86
HTRA2	0.883932	-2.01
ZNF253	0.883674	3.03
SOCS5	0.883664	3.87
EXOC7	0.883468	-1.83
SLC7A11	0.883216	7.33
GALNT1	0.883069	4.06
VTI1B	0.883005	1.96
POT1	0.882975	3.87
NEK8	0.882897	-1.65
BCS1L	0.882718	-1.98
MOB1A	0.88248	2.3
KIAA1429	0.882445	5.43
KDSR	0.882425	1.93
MRPS12	0.882228	-2.66
ZMYND11	0.88217	3.99
PPM1B	0.881725	1.79
SLC7A2	0.88162	3.56
NPIPB5	0.881528	2.56
HEXA	0.881443	-2.19
TBC1D23	0.881098	3.06
ASL	0.880739	-2.35
UTRN	0.880709	2.59
HMBOX1	0.880626	2.31
ATP2B4	0.880459	4.1
CISD2	0.880326	2.44
FAM83G	0.880197	-2.31
SASH1	0.879695	2.52
CC2D1B	0.879627	-2.56
PXMP2	0.879602	-1.94
C7orf50	0.879538	-3.33
SMAD5	0.879447	3.34
KDELC2	0.879326	3.89
LRIF1	0.879297	2.37
UQCR11	0.879256	-5.85
KIF22	0.878798	-1.79
TMX1	0.878611	3.39
TP53BP2	0.878327	1.93
C2orf47	0.877971	1.75
PLEKHM3	0.877834	1.97
ABCF3	0.877767	-2.22
SCAP	0.877733	-3.27
RCOR2	0.877569	-1.81
NDUFA5	0.877565	3.05
UHMK1	0.877368	4.05
FEM1C	0.877063	2.07
GNPNAT1	0.877058	2.06
PHF20	0.87704	1.88
EIF6	0.87702	-2.5
CASD1	0.876864	2.11
BCAT1	0.876849	3.3
GHITM	0.876812	1.6
USP33	0.876344	2.65
BAIAP2L1	0.876274	-2.69
ATP5G3	0.875737	-2.09
STAT1	0.875502	3.56
MVK	0.875372	-1.96
CA2	0.875253	-1.84
GOLGA7	0.87514	1.97
C12orf45	0.875026	-1.99
MRPL2	0.874964	-2.23
L3HYPDH	0.874922	1.74
ATR	0.874889	1.71
QKI	0.874816	2.7
FAM3C	0.874812	2.54
ZNF526	0.874766	-2.35
CCT6A	0.874719	2.44
STYXL1	0.874633	-2.56
EDARADD	0.874176	-1.94
ORC2	0.873981	2.22
CACFD1	0.873966	1.8
ZNF717	0.873885	1.77
LMBRD2	0.873802	4.08
MORF4L1	0.873608	2.01
ABCE1	0.873605	4.04
RPS28	0.873246	-1.78
PEF1	0.872999	-1.84
AAMDC	0.872941	-2.45
ZNF277	0.87285	1.99
RECQL	0.872767	4.24
PDHA1	0.872683	1.95
MED9	0.872663	-1.83
KIF18B	0.872307	-1.95
IPO9	0.872304	2.07
CANX	0.872267	2.98
TMEM131	0.872003	3.3
NDUFV3	0.871934	-2.2
SMYD5	0.871799	-1.78
ZNF443	0.871642	2.25
MAZ	0.871412	-2.76
LRIG2	0.87066	2.5
ZNF614	0.870609	2.96
MINPP1	0.870532	3.27
RAB2A	0.870494	2.07
FURIN	0.870188	-1.89
NDUFB2	0.870034	-2.69
PTCD2	0.869552	2.24
WWP1	0.869299	2.25
KIAA0196	0.869145	3.75
IMPDH1	0.86874	-2.56
TSPAN4	0.868734	-2.03
POLR3B	0.868509	3.53
INTS8	0.868398	2.12
BIRC6	0.868153	4.18
TBL2	0.867755	-2.5
RRP7A	0.867523	-3.54
EID1	0.867343	2.31
ADPRHL2	0.867178	-1.94
TMEM201	0.867147	-2.09
LONP2	0.867065	2.05
SLC35E3	0.866935	1.75
USP32	0.866827	3.35
SETD2	0.866765	1.92
FANCG	0.866637	-2.18
AASS	0.866509	2.77
TOMM34	0.86617	-1.74
PPP6R1	0.866128	-5.12
SMCHD1	0.865964	3.01
ICE2	0.865912	2.68
ZNF682	0.86581	1.8
PPIH	0.865342	-2.97
LAMP2	0.865241	1.82
DSTN	0.865219	1.85
ATP11C	0.865189	4.69
PRADC1	0.865076	-1.79
COA3	0.865025	-3.14
ACVR1	0.864531	1.8
IDI1	0.863546	2.04
NMD3	0.863474	4.34
ZNF415	0.863146	2.01
RPL22L1	0.862845	-2.2
SGCB	0.862838	2.16
LIN54	0.862774	2.29
ZNF446	0.862732	-1.9
MYO1B	0.862022	2.36
GORAB	0.861745	2.74
KIAA0368	0.861396	3.52
DRG2	0.861199	-2.36
MRPL17	0.861136	-3.06
GLOD4	0.861044	-1.65
ALG10	0.861013	3.14
ARHGAP21	0.86088	4.52
UQCRC1	0.860837	-1.72
SGSM3	0.860669	-1.88
YDJC	0.860603	-2.52
NDUFA10	0.860584	-2.79
ZNF576	0.860356	-1.83
CHCHD2	0.860044	-3
E2F7	0.859917	1.87
BAK1	0.859815	-2.28
RFC2	0.859661	-2
METTL1	0.85923	-3.43
FAM169A	0.859099	1.69
PARN	0.85897	1.97
TRIM37	0.858833	3.7
GMFB	0.858702	3.49
SFXN4	0.858588	-2
ATP5F1	0.858524	1.95
WDSUB1	0.858467	2.01
VAPA	0.858435	1.72
FGD3	0.858343	-1.75
PHPT1	0.858262	-3.22
DCTPP1	0.857776	-4.06
SCRN2	0.857739	-1.61
KIAA1468	0.85771	2
PUF60	0.857182	-2.4
OSTF1	0.856897	2.63
DHX9	0.856889	1.98
LAMB1	0.856859	2.21
WSB1	0.856818	1.73
ERRFI1	0.856568	1.96
RFX7	0.856181	3.07
ZNF81	0.856073	1.97
UBXN2B	0.856072	2.04
RUNX1T1	0.855756	-3.4
MRPL28	0.855664	-2.56
RALGAPA1	0.855645	3.93
RTCA	0.855441	4.09
MED13L	0.85534	2.47
ELK4	0.85518	1.8
YTHDC2	0.855022	2.32
GOPC	0.855006	3.16
DROSHA	0.854996	1.79
GNPTAB	0.854933	2.79
C11orf73	0.854687	-1.59
ESD	0.854336	2.44
USP25	0.853849	2.23
NAA50	0.853606	1.91
PLEKHA1	0.853586	2
FGFR1OP	0.853485	1.91
SS18	0.853366	1.78
DCTN4	0.853056	3.84
ADAM9	0.852716	3.2
C19orf25	0.852606	-1.74
MRPL24	0.852498	-2.26
SEPHS1	0.852407	-1.84
CCT4	0.85239	-1.6
ENDOV	0.852338	1.91
ZNF266	0.852019	1.86
TXNRD1	0.851987	3.06
TBC1D5	0.85193	1.9
PLEKHM2	0.851915	-2.04
RBMS1	0.851841	3.18
TSTA3	0.851716	-2.18
SRBD1	0.851493	2.01
ANKRD27	0.85148	-1.64
CUL3	0.851361	2.57
CDK1	0.851295	2.43
NAA15	0.851106	3.92
CIAPIN1	0.851101	-1.63
RNF185	0.850906	-1.78
VRK3	0.850742	-1.87
IMPDH2	0.850659	-2.02
RNF8	0.850595	1.78
DDX28	0.850334	-2.61
NARS	0.850052	3.04
NUMA1	0.849989	-1.85
C1GALT1C1	0.849897	1.88
SNRPG	0.849891	-1.84
RPEL1	0.849865	-1.91
FNBP1L	0.849682	2.02
DGKZ	0.849599	-2.11
MMS22L	0.849576	2.02
WDR77	0.849545	-1.84
SLC35A5	0.849202	5.08
NPEPPS	0.849186	1.96
PAICS	0.849146	2.44
MYL6	0.848844	-3.29
DTWD2	0.848831	2.49
LEMD2	0.848797	-2.1
NAMPT	0.848541	5.32
PPIL4	0.848453	2.09
STAG3L4	0.848224	1.64
MRPL49	0.848184	-1.59
MRPL23	0.847783	-4.37
PDE12	0.847726	2.61
AAGAB	0.847559	1.94
VASP	0.847518	-2.43
BIN3	0.847436	-2.47
PGK1	0.847413	-3.4
MAFA	0.847205	-1.73
FAM217B	0.84719	2.32
TRDMT1	0.847135	1.81
MRPS33	0.847013	-1.76
FPGT	0.846712	2.15
G3BP2	0.846645	3.47
PTPN2	0.846008	2.12
FASTK	0.845941	-1.95
LDLRAD3	0.845883	2.05
FUZ	0.84573	-2.72
WDR83OS	0.845654	-1.9
SLC38A2	0.845531	5.27
CCDC84	0.845095	2.32
CEP44	0.845072	3.04
DOCK7	0.844386	3.39
ZDHHC13	0.844307	1.76
FASTKD3	0.84411	2.5
RNF6	0.844103	6.39
PQLC1	0.844012	-2.03
TMED10	0.843983	2.08
LAMTOR4	0.843859	-2.3
ANKRD13D	0.843552	-2.23
HEATR5B	0.843538	2.33
ENO1	0.84345	-4.35
ZSCAN29	0.843235	1.88
POC1A	0.843166	-1.84
ATXN2	0.84296	2.47
PAXBP1	0.84272	2.5
MIB1	0.842623	3.41
CLPX	0.842449	1.66
VPS4A	0.842441	-1.79
XIAP	0.842226	2.53
SMARCA5	0.841923	3.15
COX8A	0.841834	-2.39
ZFX	0.84177	2.25
CEPT1	0.8416	1.79
RBBP9	0.841495	2.24
USP53	0.841381	2.66
KPNA3	0.84128	1.76
SRF	0.841226	-1.85
CCAR2	0.841142	-1.67
TMEM115	0.840997	-1.65
TBK1	0.840961	4.29
SEC24D	0.840722	2.79
COX5A	0.840445	-2.14
DPM3	0.840442	-1.85
KRIT1	0.840229	9.15
PCGF5	0.840122	-1.65
CEBPZ	0.839986	2.75
GADD45GIP1	0.839957	-1.75
HECTD1	0.83944	4.76
NLK	0.839412	1.63
CPNE3	0.8394	2.85
BCAR1	0.839138	-1.81
SLC25A30	0.839045	2.69
PPP2R4	0.838784	-2.51
TXLNG	0.838668	2.71
ELOVL5	0.838465	1.98
TAZ	0.838347	-2.58
PSIP1	0.838168	3.33
KPNB1	0.837943	2.14
TRAP1	0.837898	-2.4
ZNF420	0.837739	2.11
TNPO1	0.837618	2.56
CLCN3	0.837583	2.78
MNAT1	0.837426	1.89
NDUFA3	0.837252	-1.91
COX5B	0.837173	-3.45
ATP11B	0.83712	2.72
ALDOC	0.836681	-1.66
ASAP2	0.836667	2.12
NDC80	0.8366	3.89
ANAPC10	0.836304	2.08
LIMS1	0.836243	3.04
FAM72B	0.836202	2.7
UROD	0.836036	-2.46
CST3	0.835861	-3.33
WDR26	0.835714	1.89
ATP6V1F	0.835566	-2.14
ZWILCH	0.835561	2.22
VPS37B	0.835559	-2.22
MRPL14	0.835418	-1.98
MCM10	0.83528	2.36
NLE1	0.83521	-1.91
ZW10	0.835068	2.68
MTR	0.834991	2.76
MAPK9	0.834847	1.77
GPAM	0.834827	1.7
RPRD1A	0.834697	2.16
EEF1D	0.83447	-2.48
ARMC6	0.833976	-3.48
PCBP1	0.833664	-1.68
ZNF791	0.833646	1.92
CBR4	0.833257	1.94
UCHL3	0.833189	2.11
SECISBP2	0.833052	2.14
SIX4	0.832538	1.66
GEMIN8	0.832284	-1.83
CDC42	0.832135	-2.83
RBM12B	0.832081	3.27
KRTCAP2	0.832053	-1.66
SLC25A24	0.832015	3.53
ARPC1B	0.831666	-2
PIBF1	0.831442	2.71
XPNPEP3	0.831341	2.42
SETD3	0.831329	2.69
KIF5B	0.831017	-2
INSIG2	0.83084	2.3
HMOX2	0.830801	-1.84
RPE	0.830563	1.75
C19orf70	0.830376	-3.58
LARS	0.83033	2.05
ARMC8	0.830273	4.48
GEN1	0.830237	3.64
PDHA2	0.830086	-1.66
SNRNP40	0.830065	-1.98
PSMD12	0.829888	3.33
DDX56	0.829863	-2.64
EEA1	0.829718	3.24
UQCRB	0.829689	2.77
CAND1	0.829607	4.09
SUZ12	0.829599	3.41
SMIM13	0.829468	1.89
HSP90AA1	0.829001	4.4
SYNCRIP	0.828882	2.19
NFE2L2	0.828814	2.13
MYO19	0.828687	-2.33
PLS3	0.828555	2.45
SNX5	0.828438	2.69
UBE3C	0.828161	1.76
LCLAT1	0.828113	3.44
ZNF234	0.827991	2.11
ICT1	0.827835	-1.74
SERBP1	0.827733	2
IFNGR1	0.827308	1.87
FAM210A	0.827036	2.68
ARID1B	0.826879	1.97
ZCCHC8	0.826693	2.3
ARL16	0.826419	-2.16
DOHH	0.826094	-1.87
HEXB	0.825956	1.66
PCBD1	0.825926	-1.86
OCIAD1	0.825837	2.5
LSM4	0.825659	-1.82
SACM1L	0.825518	2.51
LENG1	0.825438	-2.33
EPC2	0.824676	2.19
ABI1	0.824513	2.67
PPP1CA	0.824372	-1.64
NOL6	0.824332	-1.81
RIN2	0.824303	2.28
MED27	0.824171	-2.46
TAF6L	0.824145	-2.25
PDLIM5	0.823906	2.14
MYCBP2	0.823684	6.63
MED29	0.823659	-1.67
PKN2	0.823528	3.27
EP400NL	0.823463	1.72
EMC6	0.823337	-2.68
SERINC3	0.823221	2.78
EFR3A	0.823117	2.94
MAF1	0.822752	-2.66
RNH1	0.822372	-4.76
PGGT1B	0.822232	5.53
NCLN	0.822223	-2.29
FLAD1	0.822216	-1.98
SMAD2	0.822077	2.89
TAB3	0.822066	1.77
KEAP1	0.821821	-2.14
ME2	0.821753	2.52
KCTD3	0.821736	3.52
VPS29	0.821689	2.06
METTL15	0.821549	3.21
RNF139	0.821235	1.73
PGBD1	0.821206	2
SSR4	0.820888	-3.22
ICA1L	0.820677	1.94
PPIL1	0.820539	1.68
ZXDC	0.820306	1.82
ZNF28	0.820281	3.66
COX4I1	0.820131	-1.94
DNTTIP1	0.819873	-2.41
TMEM33	0.819864	2.09
HEATR5A	0.819829	2.73
MCM2	0.819776	-2.3
MRPL42	0.819753	2.08
XPOT	0.819718	3.57
EIF3E	0.8191	-2.14
RBP1	0.818857	-2.13
LRPPRC	0.818812	3.43
PSMD6	0.818657	2.15
TIMM13	0.818566	-2.25
CDK16	0.818362	-1.99
TOMM22	0.818352	-1.63
PTCD3	0.818249	2.73
UHRF1BP1L	0.81824	2.43
TBL1XR1	0.817927	3.63
RRM2B	0.817605	4.03
ARAF	0.817557	-1.98
ZNF417	0.817546	3.7
PGAM5	0.817411	-2
MGME1	0.817318	2.35
NCBP1	0.81706	2.68
ZNF577	0.816655	1.96
PPAT	0.816654	2.56
GPATCH1	0.81654	1.95
TWISTNB	0.816343	3.84
DUSP16	0.816208	2.04
F11R	0.816162	-1.81
BAD	0.816143	-4.51
SP3	0.815798	3.86
PSMA4	0.81568	3.5
THAP7	0.815645	-1.64
CCDC51	0.815514	-2.03
TRIM28	0.815337	-2.11
SEC23IP	0.815275	2.89
ACADSB	0.815247	2.32
ZNF43	0.815195	1.99
PDCD10	0.81516	4.1
ZNRD1	0.815158	-3.28
SLC4A2	0.814976	-1.85
EML3	0.814887	1.65
AHCY	0.814867	-2.76
MTFR1	0.81481	1.7
SUPT20H	0.814788	1.97
RAD18	0.814788	3.6
FKTN	0.814752	2.59
RAB30	0.814678	1.92
CAPRIN1	0.814657	1.78
DAP	0.814646	-1.96
BCAP29	0.814455	2.12
SMTN	0.81433	-1.87
ITGB1	0.81418	1.95
USP48	0.81415	2.03
FEN1	0.81353	-1.79
CTR9	0.813476	4.53
ADSL	0.813334	-2.33
ZNF195	0.813162	2.94
MORF4L2	0.813008	1.88
PHB	0.813005	-1.9
IFT57	0.812726	4.38
PPP4R2	0.812696	4.56
NT5C3B	0.812667	-2.62
DLG1	0.812645	3.9
FNDC3A	0.812006	2.35
ZNF282	0.812002	-1.73
S100A13	0.811382	-3.29
HELQ	0.811352	2.02
LRRC8D	0.811258	2.51
PAK2	0.811186	2.23
OSTC	0.810978	2.2
UBE2F	0.810808	-2.24
COPS4	0.810739	4.89
LACE1	0.810362	2.06
EPRS	0.810324	5.2
COX6B1	0.810154	-2.99
ZBTB43	0.810021	3.34
RPL11	0.8099	-1.69
MAP3K7	0.809882	2.66
TIPRL	0.809539	1.68
C3orf58	0.809536	4.16
GPATCH8	0.809381	2.5
AKT2	0.809224	-1.77
XPO4	0.808867	2.82
FBXO30	0.808441	6.04
PSMA1	0.808294	1.92
SIL1	0.808126	-1.79
UFL1	0.808006	2.8
PLA2G12A	0.808001	1.75
CDK6	0.807978	2.84
ARHGEF16	0.807798	1.62
ATG4D	0.807505	-2.08
EPCAM	0.807434	-1.84
ATP6V0E1	0.807412	1.64
RPP25L	0.807195	-1.98
PTGES2	0.807154	-1.95
ATOX1	0.80706	-1.86
PPP1R15B	0.806943	2.56
HDLBP	0.806831	1.59
SUPT6H	0.80673	1.63
RTN3	0.806656	2.69
ACTR1A	0.806432	-1.69
RCAN3	0.806429	2.76
INTS9	0.806418	-1.69
EIF3B	0.806194	-1.78
MAVS	0.806119	-4.84
LYRM7	0.80608	1.92
DENND4A	0.805617	2.99
WDR6	0.805492	-1.94
AUP1	0.80546	-2.03
NUS1	0.805114	1.66
SHCBP1	0.804799	2.38
COMMD8	0.804238	2.81
MIA3	0.804132	2.34
KMT2A	0.804041	3.4
RRP1	0.803835	-1.81
TANK	0.803764	2.04
DCUN1D1	0.803589	3.88
GCH1	0.80325	1.96
TARSL2	0.802866	3.79
ZNF146	0.802816	3.54
ITPA	0.802737	-2.64
PSMD1	0.802646	4.05
MAFK	0.802473	-2.86
URM1	0.802317	-1.87
THAP5	0.80229	2.23
NARF	0.802046	-1.96
UQCR10	0.801785	-3.69
BAHD1	0.801671	-1.7
SC5D	0.801435	3.71
RPS15A	0.80136	-1.74
MRPL50	0.801347	3.2
HSDL2	0.801134	2.71
RASA1	0.801091	2.9
MALT1	0.80093	2.64
SERP1	0.800721	-1.92
FAM173A	0.800646	-2.18
CD2BP2	0.800532	-3.13
FAM160B1	0.800415	2.42
AEBP2	0.800411	2.44
TOMM7	0.800356	-3.57
NUBPL	0.800001	1.92
HIPK1	0.79985	2.27
NMI	0.799828	2.33
PPFIBP1	0.799757	1.67
TMEM123	0.799746	4.24
VTA1	0.79956	4.01
RARS	0.799473	1.67
CBL	0.799233	-1.62
DTYMK	0.799191	-3.15
CCDC6	0.799149	2.55
NDUFB7	0.798808	-3.66
AP1G1	0.798733	2.64
MAPK1IP1L	0.79863	1.89
RPS27L	0.798605	2.01
RBM18	0.798311	2.24
USP22	0.798043	-1.61
TSG101	0.798041	1.69
WDHD1	0.798011	2.52
MYCN	0.797829	-2.09
HSPA13	0.797548	7.37
SNAPIN	0.797484	-2.03
PTPN11	0.79738	3.21
EXOSC2	0.797377	-1.72
CDKN1A	0.797357	-2.4
POLA1	0.797319	2.36
MRPS34	0.797046	-1.8
SLC25A36	0.797016	3.54
MAK16	0.796971	2.42
BANF1	0.796962	-1.59
ARF5	0.796956	-2.06
MDN1	0.796827	1.71
HSPA14	0.796584	2.68
NOP16	0.796531	-2.58
ATXN7	0.79626	1.79
TNKS	0.796142	2.28
MLST8	0.796096	-2.13
FIBP	0.796052	-2.26
RNASEH2A	0.795872	-2.46
CYTH2	0.795793	-2.31
DPCD	0.795757	-2.66
TSR1	0.795711	-1.72
NUP205	0.795622	1.74
ZNF621	0.795571	2.2
HIF1A	0.795381	4.07
MID1IP1	0.795227	-1.91
TSC22D1	0.795097	1.63
TP53BP1	0.795078	2.02
B4GALT3	0.795058	-2.15
MRPL27	0.794978	-1.9
RWDD4	0.794737	1.9
MTMR2	0.794702	3.16
NSD1	0.794415	5.44
UGGT1	0.794401	3.04
POGZ	0.794345	-1.7
RNPS1	0.79434	-1.81
LRRC8B	0.794302	2.02
NELFB	0.794236	-2.49
CLASP2	0.794153	2.58
AURKAIP1	0.793814	-2.05
HMCES	0.79363	-2.3
BTBD6	0.793426	-2.48
BAG1	0.793096	-2.68
AGGF1	0.792827	2.17
ERAL1	0.792693	-2.49
DGKD	0.792691	-2.42
ERCC4	0.792683	4.12
GPX4	0.79247	-3.11
BATF3	0.792387	-2.15
VPS45	0.79237	2.15
PSMB7	0.792224	-1.6
CAPZA1	0.79184	2.53
FAM193B	0.791783	-1.79
SRP72	0.791438	3.95
DCK	0.791265	1.74
COX6A1	0.791151	-2.5
TXNDC9	0.791095	3.41
UBQLN1	0.790952	1.77
CUL1	0.790527	2.56
EIF3H	0.79044	2.05
ZNF574	0.790334	-2.39
LTN1	0.790201	2.89
TMEM170A	0.790099	2.23
OSBPL11	0.790093	2.23
CKS2	0.790075	-1.91
PGM2L1	0.790045	2.09
SLC39A3	0.789866	-2.21
GJA1	0.789788	2.74
ZNF383	0.789781	2.28
FIP1L1	0.789753	1.64
HSBP1	0.789695	-1.74
TWF1	0.789666	6.14
CDT1	0.789579	-3.54
DUSP11	0.789547	2.17
HDAC2	0.789483	2.44
RANBP9	0.789467	2.66
NME6	0.78935	-1.63
COPB2	0.789322	1.93
AQR	0.789178	2.55
ARL5A	0.789148	1.64
ATP5G1	0.788908	-1.94
MYH10	0.788769	2.92
FHL3	0.788741	-2.3
AHCYL1	0.788737	1.64
PRPS2	0.788636	2.04
CCDC47	0.788491	3.41
FXR1	0.788387	4.45
CHTOP	0.7883	-1.81
ZNF700	0.788153	1.61
PBK	0.787711	2.2
SUPT7L	0.78771	2.75
ERGIC3	0.787686	-1.88
PRPF31	0.787558	-2.41
EPT1	0.787481	3.19
ARF4	0.787362	2
SV2C	0.787269	-2.12
DDX23	0.787042	-1.89
DPP8	0.787011	3.35
ZNF799	0.786836	3.25
C5orf51	0.786819	2.86
ABHD11	0.786436	-2.46
SLC25A43	0.786363	2.8
TIMM44	0.786127	-1.75
DBT	0.785563	2.09
POLDIP3	0.785555	-3.22
ZNF737	0.785518	1.88
SNW1	0.785265	2.41
SLC39A9	0.785131	1.9
SCAF11	0.785051	2.94
B3GAT3	0.784934	-1.95
FAM46A	0.78487	3.17
RDX	0.784834	2.76
SENP1	0.78481	2.27
NAA30	0.784808	2.28
POLR2D	0.784449	-1.67
AP5M1	0.784422	5.58
TOMM40	0.784085	-2.02
PHACTR2	0.784069	2.68
MCOLN1	0.783751	-1.78
CCSER2	0.783319	3.25
KLF5	0.783305	1.79
ENAH	0.783277	3.36
TTC21B	0.783237	2.64
PFDN5	0.783174	-5.01
TCF12	0.782904	4.11
CBX3	0.782788	1.98
CSNK1A1	0.782783	2.17
SBDS	0.782607	3.65
MPDZ	0.782456	2.77
NDUFA6	0.782424	-1.83
PRKDC	0.782279	4.87
MICU2	0.782078	2.32
ITCH	0.782077	1.9
TRNAU1AP	0.781934	-2.52
KIAA2026	0.781826	2.42
TNFRSF12A	0.781707	-2.15
NAGPA	0.781589	-1.71
RIOK3	0.781566	3.4
PTAR1	0.781526	3.34
COL4A3BP	0.781444	3.51
RIPK2	0.781402	3.09
FEM1A	0.781091	-1.9
ZNF493	0.781054	2.33
RHEB	0.780851	-1.83
PJA2	0.780817	4.27
C1D	0.78075	1.7
PLEKHA5	0.780684	3.73
NR2C1	0.780642	2.51
DGUOK	0.780414	-1.69
ATAD1	0.780111	2.17
PTPMT1	0.779957	-1.74
CMTM6	0.779522	3.71
COX7B	0.779285	-1.67
MRPS18B	0.779211	-1.8
PSMA3	0.779164	2.97
MYEOV2	0.779024	-3.31
ATG4B	0.778754	-2.43
MGAT1	0.778572	-1.74
CSDE1	0.778525	3.4
CD164	0.778469	3.19
CCNG1	0.778358	2.41
FOPNL	0.778062	1.94
CDCA8	0.777741	-2.02
RPS6KB1	0.777671	2.45
C8orf59	0.777322	-2.31
DNAJC30	0.776956	-1.64
PAPOLG	0.776846	1.99
METTL14	0.776706	3.37
DYNLRB1	0.77665	-2.27
PUS1	0.776507	-1.77
RPP38	0.776373	1.78
PSMB10	0.776337	-2.94
PRKAR1A	0.776067	4.87
ZDHHC16	0.776045	-1.6
RPS27A	0.775779	-1.87
MTRR	0.775734	2.16
CPSF6	0.775634	-1.63
ECSIT	0.775411	-2.56
LYN	0.775352	1.9
ATP6V1C1	0.77532	2.26
CCDC107	0.775217	-2.75
TRAPPC8	0.774932	3.68
TAF2	0.774903	4.73
GPS2	0.774557	-3.3
COPS8	0.77445	2.82
PUS7L	0.773944	2.14
TRMT1L	0.773934	2.44
CCDC34	0.77391	2.64
TM2D3	0.773906	1.88
NCBP2	0.773832	2.21
TRAF4	0.773755	-2.75
BET1	0.773594	3.07
VEZF1	0.77343	2.67
UBXN4	0.773295	4.21
VPS41	0.772784	2.22
STRN	0.772365	3.39
TMEM216	0.772275	-1.71
NDUFA13	0.772161	-4.13
LMAN1	0.772043	4.75
OTUD6B	0.771981	2.42
NSMCE1	0.771965	-2.39
RNASET2	0.771827	-1.74
ACOX3	0.77153	-1.93
RPAP3	0.771394	2.73
UBE4A	0.771309	2.5
HSPA9	0.77127	2.92
SLC7A8	0.771227	1.83
STX16	0.771077	1.81
EVI5	0.770757	3.25
OSGIN2	0.770718	2.36
ANKRD17	0.770667	4.27
FAM49B	0.770632	2.48
NUP93	0.770561	-1.77
ANLN	0.77056	5.31
TOP2A	0.770484	7.04
CGGBP1	0.770425	2.85
RPS19BP1	0.77026	-2.25
SURF2	0.770203	-2.1
MSH2	0.770057	3.15
MYO10	0.769588	3.04
KLF9	0.769557	1.84
EZH2	0.769454	2.22
EIF3D	0.769093	-2.45
HELLS	0.769024	4.19
PDE5A	0.768819	2.93
NUP107	0.768741	4.38
NAA10	0.76865	-2.57
NIN	0.768579	3.39
CREB1	0.768427	1.76
NBEAL1	0.768308	2.72
C12orf4	0.768221	4.57
ACOT7	0.767844	-1.87
STAT3	0.767517	1.8
VMA21	0.767452	2.62
SNRPE	0.767422	2.1
WDR73	0.767233	-2.03
STAU2	0.767232	4.04
ANP32E	0.76721	3
TADA2B	0.767095	1.74
ZNF432	0.767085	2.14
UBE2K	0.766953	1.81
OSTM1	0.766903	6.2
ATE1	0.766553	3.61
IDH3B	0.765674	-1.97
TACC1	0.765427	3.13
ADIPOR2	0.765383	-2.2
CCNC	0.764972	3.24
CPSF2	0.7649	6.47
COPE	0.764332	-2.22
GDI2	0.764234	1.95
VPS72	0.763871	-1.8
CRYM	0.76377	2.25
BROX	0.763755	6.14
CAMK2D	0.763581	2.51
RCN1	0.763447	2.2
ZNF511	0.763445	-2.45
IGSF8	0.763368	-1.69
CALD1	0.763206	2.03
PACS2	0.763204	-1.76
AGPAT5	0.763149	2.83
ERLIN2	0.763041	1.73
WDR61	0.762959	-2.02
DDX20	0.762944	2.34
ABCD3	0.762755	2.13
ZNF160	0.762638	2.32
ARPP19	0.762525	3.09
BABAM1	0.761912	-2.56
ZNF138	0.761814	2.97
AGPS	0.76181	2.65
ATAD5	0.761771	2.12
RAB11FIP2	0.761703	2.96
MLX	0.761531	-2.7
RYBP	0.761414	2.25
EXO1	0.761328	2.3
KIAA1033	0.761165	1.78
POLQ	0.761037	2.55
APEX1	0.760989	-1.96
HSD17B10	0.760731	-2.96
ICK	0.760691	1.87
CDCA2	0.760661	3.32
PANK4	0.760577	-1.86
LMO4	0.760423	2.03
VBP1	0.76041	2
CCNL1	0.760385	2.02
TMED2	0.760353	2.48
NIFK	0.759678	2.67
HDAC3	0.759481	-2.29
C6orf62	0.759478	2.83
MAP4K5	0.759473	2.12
SPAG9	0.759292	3.74
HNRNPR	0.759115	2.32
FGD6	0.758925	2.7
CEP57	0.758899	2.14
CENPB	0.758826	-4.8
BPTF	0.758687	1.72
TCEB2	0.758389	-5
FAM98B	0.758333	2.89
HKR1	0.758205	1.81
HNRNPDL	0.758155	2.19
CDC42SE1	0.758091	-1.68
MRPS17	0.758079	-1.76
POLE	0.757591	-3.31
ZBTB44	0.757303	1.66
GTF2A1	0.75704	2.33
RPS9	0.757031	-1.67
SLC25A10	0.756924	-1.92
ARPC3	0.756851	1.86
ARL5B	0.756849	1.79
NUDT6	0.756779	1.63
FAM71E1	0.756742	-1.67
WDR36	0.756707	3.6
MIOS	0.75663	3.65
NUDCD2	0.756482	-2.48
NDUFB8	0.756167	-2.01
PSMD10	0.756137	1.97
EIF1AX	0.756002	2.55
LTA4H	0.755994	2.4
ASNSD1	0.75582	2.85
POLR2B	0.755816	2.67
OXSR1	0.755771	2.26
TARDBP	0.75575	2.4
SLC35F5	0.755707	4.06
LARP4	0.755436	2.08
KLHL20	0.755349	2.93
IFNAR2	0.755236	1.67
TPP2	0.755107	3.23
PSMC6	0.754632	2.9
GAMT	0.754525	-1.75
TRIM5	0.754302	2.11
SNX6	0.754292	2.88
UBAC1	0.754115	-2.06
SPICE1	0.754001	3.01
CDC25A	0.753597	-1.73
HNRNPA2B1	0.753567	2.93
TMEM181	0.753543	1.96
EPS15L1	0.753473	-2.42
DMAP1	0.753265	-1.97
MRPS15	0.75301	-1.88
USP40	0.752999	2.01
DDHD1	0.752951	5.62
PSMD11	0.752878	2.19
THUMPD3-AS1	0.752859	1.72
SDHAF2	0.752676	2.25
ZFYVE9	0.752666	3.28
COG3	0.752555	2.76
TACSTD2	0.752401	-1.67
[truncated: 1,587 more rows]

## Sheet: GSEA
3586 genes	Term	Overlap	P-value	Adjusted P-value	Odds Ratio	Combined Score	Genes	PanglaoDB Augmented 2021					3586 genes	Term	Overlap	P-value	Adjusted P-value	Odds Ratio	Combined Score	Genes	WikiPathways 2019 Mouse					3586 genes	Term	Overlap	P-value	Adjusted P-value	Odds Ratio	Combined Score	Genes	BioPlanet 2019					3586 genes	Term	Overlap	P-value	Adjusted P-value	Odds Ratio	Combined Score	Genes	WikiPathway 2021 Human
	Pluripotent Stem Cells	44/112	8.45306e-08	1.47929e-05	2.98612	48.6323	SUV39H2;ERCC6L;BLM;HDAC2;NUP107;MCM8;CCNF;SRSF1;GMPS;PSIP1;MCM10;KIF11;PFAS;PHF6;SOX2;PPAT;CHEK1;KNTC1;SEPHS1;HNRNPA1;PLK4;WDHD1;HELLS;SUPT16H;RFC3;NPM1;ATAD5;ZGRF1;RCC2;LIG3;NAP1L1;TERF1;PAICS;ZFX;NDC80;POU5F1;MSH6;CCNA2;DEPDC1B;CENPF;MSH2;FUBP1;MCM4;TDGF1							mRNA processing WP310	145/457	3.73886e-13	6.05695e-11	2.17475	62.23	LTV1;FMR1;EIF4A3;HNRNPR;RPL9;ALKBH8;RPS14;FBL;RAVER1;SNRPD2;PAPOLG;EIF2D;SNRPD3;RPS9;RBFOX2;RPS7;IMP3;SECISBP2;METTL3;PRPF4B;CDC40;UHMK1;SNRPG;CD2BP2;SRSF4;SNRPE;SRSF5;SREK1;SNRPC;SRSF7;SNRPB;DDX6;DDX5;RNASEH2A;TMED10;DHX9;CSTF3;DDX1;CSTF2;HTATSF1;FXR1;HNRNPDL;RAD21;PCBP1;TRMT1L;BARD1;RPL39L;CPSF4;TIA1;RBPMS;CPSF3;ALYREF;CPSF2;ERAL1;MRPL23;LSM4;LSM2;PUM2;DAZL;CDK9;LSM7;RPS28;HNRNPK;RPS27;HNRNPF;R…							Gene expression	341/968	7.66613e-40	1.05793e-36	2.64589	238.306	RPL5;RPL30;NUP107;VARS;CCNH;EHMT2;EIF4A3;SERPINE1;CCNC;HNRNPR;PHAX;RBPJ;EPRS;RPL9;LSM10;PSMD8;RPS15;PSMD9;RPS14;PSMD6;RPS16;SNRPD2;TRIM28;RPL18A;RPS19;PPP2R1A;ZSCAN32;MAGOH;AKT1;PSMD1;RPL35;SNRPD3;JUNB;RPS10;RNF111;ZNF17;MED1;ZNF282;ZNF160;METTL3;ZNF12;ZNF14;CDC40;RUNX2;MED7;WDR77;NUP93;PSME4;PSME1;CD2BP2;TFAM;RPL27;RPL29;UBA52;ZNF28;ZNF274;NUP205;ZNF273;RPN2;DHX9;CSTF3;CSTF2;AAAS;ZNF25;HIST1H3A;…							DNA Repair Pathways Full Network WP4946	56/120	4.09118e-13	2.35652e-10	4.05276	115.604	FEN1;WDR48;MPG;CCNH;HMGB1;BRCA1;EXO1;CHEK1;REV3L;POLI;NBN;POLK;POLE;RFC3;RFC1;RFC2;H2AFX;LIG4;LIG3;MSH6;NEIL3;MSH2;MSH3;PCNA;PRKDC;UNG;BRIP1;WRN;RAP1A;POLD2;USP1;MBD4;XRCC4;XRCC5;FANCA;GTF2H1;GTF2H3;PALB2;FANCG;GTF2H5;POLE4;CUL4A;SMUG1;CDK7;RAD50;RAD51;ERCC4;POLE2;ERCC1;APEX1;ERCC2;ERCC8;ATM;MNAT1;ATR;CUL4B
	Embryonic Stem Cells	55/176	1.19204e-05	0.00104304	2.0974	23.7787	ITGB1;NCKAP1;CTNND1;WWC2;LAMC1;FNBP1L;SOX2;GJA1;TRIM28;PLS3;TEAD1;TEAD2;SH3D19;TEAD4;RBFOX2;PAWR;MID1;ZFX;POU5F1;ENAH;KIT;DSG2;IL6ST;DOCK1;MDFI;EPHA2;RAI14;YAP1;LRP6;EPCAM;TSPAN6;NACC1;ERBB2;CTNNA1;SMAD2;SMAD4;YES1;RBPMS;MYO10;PCGF2;STAT3;SMAD9;LAMB1;SMAD5;PTPN14;PTK2;PUM2;DCBLD2;MYO1B;FRAS1;FAT1;CD9;CD24;TDGF1;FERMT2							EGFR1 Signaling Pathway WP572	64/178	7.2768e-09	5.89421e-07	2.5982	48.6867	ATF1;ERRFI1;ARF4;NDUFA13;CTNND1;ARAF;PEBP1;AP2A1;PIK3CB;WASL;CRKL;ELK4;GJA1;SNRPD2;SIN3A;RPS6KA1;AKT1;MAP3K4;GIT1;APPL1;JAK1;NCK1;VAV3;RALBP1;PRKCI;EPS15L1;CREB1;PIK3CA;PRKAR1A;RASA1;HAT1;SOS1;SOS2;CRK;PLEC;GRB7;HTT;PIK3R1;CBL;CDC42;NRAS;HIST1H3A;SHOC2;CSK;MAP2K7;MTA2;EPS15;MAPK3;SMAD2;MAP3K2;MAP3K1;STAT1;STAT3;RFXANK;PTPN11;PTPN12;ITCH;KRT18;WNK1;ABI1;PKN2;KRAS;RAB5A;BCAR1							Cell cycle	185/453	7.69841e-31	5.3119e-28	3.27714	227.234	ERCC6L;NUP107;CCNH;ZWILCH;GMNN;CASC5;UBE2D1;CCP110;SMC3;PSMD8;PSMD9;PPP1CC;PSMD6;CCND3;CDC23;PPP2R1B;PTTG1;PPP2R1A;RUVBL2;CDC27;CHEK1;PSMD1;KNTC1;SKP2;CDK5RAP2;CEP135;CEP131;HIST1H2AJ;DYRK1A;HUS1;CDC25A;CLIP1;ZW10;PSME4;PSME1;NHP2;UBA52;ANAPC1;HIST1H2BC;PSMD10;ANAPC13;PSMD12;PSMD11;PSMD14;PRKDC;TUBGCP2;CUL1;CDCA8;PKMYT1;ANAPC10;ANAPC11;SKA2;ORC4;NUP85;RAD21;ORC3;ORC2;CEP192;CLSPN;CEP78;PLK4;SMAD2…							Cell cycle WP179	49/120	3.52568e-09	1.0154e-06	3.18885	62.0653	GSK3B;CDKN1A;MCM7;CCNH;SMC3;CCND3;CDC23;PTTG1;CDC27;CHEK1;SKP2;YWHAG;SMC1A;YWHAZ;CDC25A;CCNA2;RBL1;DBF4;ESPL1;MCM4;MCM5;ANAPC1;MCM2;ANAPC13;HDAC2;PCNA;PRKDC;CUL1;TTK;PKMYT1;ANAPC10;ANAPC11;ORC4;FZR1;ORC3;RAD21;ORC2;E2F1;E2F4;SMAD2;SMAD4;MAD2L2;CDK7;STAG1;CDK6;CDK4;CDK1;ATM;ATR
	Undefined Placental Cells	37/108	3.47535e-05	0.00202729	2.39977	24.639	SLC25A1;GRB7;AHCY;TFRC;CDCA5;PHB;NOC2L;MRPL12;IPO4;BAIAP2L1;PRDX4;TRIM28;PES1;POLD2;PACSIN3;TK1;TEAD2;PAK4;CCT3;TEAD4;TRAP1;BATF3;PPP1R14B;TNFRSF12A;ARHGEF16;PYCR1;MRPS2;KRT18;TRAF4;GIPC1;DSG2;SLC25A10;HDGF;DHCR7;TLCD1;EPHA2;EIF3B							TNF-alpha NF-kB Signaling Pathway WP246	62/187	3.62975e-07	1.96007e-05	2.29266	33.9977	GSK3B;RPL30;SMARCB1;DDX3X;MCM7;ZFAND5;EIF4A3;PEBP1;CCAR2;IKBKB;FBL;PSMD6;TBK1;SUMO1;AKT2;NKIRAS2;CASP3;AKT1;PSMD1;KPNA3;YWHAG;GTF2I;HSP90AA1;CHUK;RIPK2;COMMD1;YWHAZ;TXLNA;TRAF4;POLR1C;POLR1D;POLR1E;MCM5;PSMD12;HDAC2;CUL1;MTIF2;NR2C2;TANK;HDAC6;PPP2CA;G3BP2;FLNA;FADD;MAP3K2;CASP8AP2;CREBBP;UBE2I;MAP3K1;STAT1;RNF25;PTPN11;MCC;PTK2;LRPPRC;KTN1;DAP;RPS6KB1;PSMC1;PSMC2;TAB3;TAB2							Disease	228/674	5.17568e-24	2.38081e-21	2.43092	130.341	RPL5;APP;RPL30;NUP107;CCNH;RPL9;ACTB;PSMD8;RPS15;PSMD9;RPS14;PSMD6;RPS16;RPL18A;RPS19;PPP2R1A;AKT2;FGFR1OP2;TRIM24;AKT1;AP1S1;PSMD1;RPL35;B2M;RPS10;ATP6V1G1;ATP6V0E1;DDX11;AP1B1;NUP93;PRKAR1A;PSME4;PSME1;RPL27;PREB;TRIB3;RPL29;UBA52;VPS28;ATF4;NUP205;PIK3R1;AAAS;HIST1H3A;NUP85;SSR1;ATP6V1C1;RPL41;XRCC4;XRCC5;EIF2AK3;MYO5A;BRAF;RPS26;RPS25;RPS28;RPS27;CALM1;ITM2B;PCSK2;CDKN1A;FEN1;ELL;FKBP14;RPLP1…							Retinoblastoma gene in cancer WP2446	39/87	6.03484e-09	1.15869e-06	3.74891	70.9508	TOP2A;CDKN1A;PCNA;MCM7;PRKDC;TTK;HMGB1;SMC3;SMC2;NPAT;CCND3;RBBP4;SIN3A;CHEK1;HLTF;E2F1;SKP2;POLE;PLK4;BARD1;CDT1;RFC3;RRM1;SMC1A;DCK;CDC25A;FANCG;MSH6;CCNA2;POLA1;ANLN;RABIF;CDK6;CDK4;POLE2;RBP1;CCDC6;CDK1;MCM4
	Reticulocytes	34/103	0.000162403	0.00710514	2.26747	19.7847	NUP205;NUP107;NUP188;TFRC;DHX9;NOP2;DDX23;HEATR1;DDX21;YBX1;IPO4;NOL6;XPO1;PDCD11;NUP85;POLR2B;TOPBP1;UGGT1;NDC1;DDX11;RCC2;NUP153;PPRC1;CUL4A;ABCB10;TSR1;HDGF;STT3B;GART;EIF3D;KPNB1;EIF3A;MCM2;EIF3B							Eukaryotic Transcription Initiation WP567	21/43	3.55683e-06	0.000123882	4.38903	55.0676	CCNH;TAF13;ILK;GTF2H1;GTF2H3;GTF2F2;CDK7;POLR3B;POLR2B;POLR2C;POLR3D;ERCC2;POLR1C;POLR2E;POLR1D;POLR2G;POLR3H;TAF5;POLR2I;MNAT1;POLR3K							DNA replication	97/207	7.80248e-22	2.69186e-19	4.12071	200.277	ERCC6L;NUP107;ZWILCH;GMNN;CASC5;SMC3;PSMD8;PSMD9;PPP1CC;PSMD6;PPP2R1B;PPP2R1A;PSMD1;KNTC1;CLIP1;ZW10;PSME4;PSME1;UBA52;PSMD10;RNASEH2C;PSMD12;PSMD11;RNASEH2A;PSMD14;CDCA8;SKA2;ORC4;NUP85;RAD21;ORC3;ORC2;CDT1;RCC2;NDC80;POLA1;STAG1;RPS27;AHCTF1;CDKN1A;FEN1;MCM7;MCM8;MCM10;XPO1;SGOL1;PPP2R5E;NUF2;POLE;RFC3;RFC1;RFC2;KIF23;PPP2R5C;RANGAP1;SMC1A;CCNA2;PSMA3;PSMA4;DBF4;PSMA1;GORASP1;MCM4;MCM5;MAPRE1;I…							Ciliary landscape WP4352	73/216	1.41467e-08	2.03712e-06	2.36441	42.7339	TTC26;MCM7;MCM8;MYL6B;MCM10;SMC4;RPGR;PSMD8;BBS7;IFT57;BBS5;RAB2A;ZYG11B;EIF5B;RBM14;EXOC8;EXOC7;ARMC8;ACSL3;ARFGAP3;DYNC1LI1;MYL6;MSH2;TIPRL;CD2BP2;EXOC3;MCM4;MCM5;EXOC5;PAFAH1B1;EXOC1;ARL8B;MCM2;YAP1;DYNC1I2;PSMD12;DDX5;HDAC2;WDR26;ECHS1;CTBP2;VPS4A;HTRA2;IQGAP1;AGPAT2;EHBP1;STOM;DCAF11;EXOSC2;NEK8;DYNC1H1;CREBBP;UBE2H;RNGTT;NDUFA5;NEK7;RANBP9;FUZ;LSM4;LRPPRC;COPS4;MKLN1;PSMC6;RAB14;APC;WNK1;CO…
	Cardiac Stem And Precursor Cells	29/113	0.0250122	0.875426	1.58497	5.84599	YAP1;ERRFI1;NCKAP1;PLOD2;LAMC1;TSPAN6;PLS3;PACSIN3;FLNC;SLIT2;SNX7;MPDZ;TEAD1;SH3D19;TEAD4;RBFOX2;PCGF2;LAMB1;MID1;ENAH;MYO1B;FRMD6;KIT;FAT1;DOCK1;FERMT2;BCAR1;EPHA2;RAI14							Electron Transport Chain WP295	38/103	3.82353e-06	0.000123882	2.69388	33.6043	COX7B;NDUFB7;UQCRB;NDUFB5;COX4I1;NDUFA10;ATP5A1;NDUFB3;NDUFB2;COX7A2;UQCR11;ATP5G3;UQCR10;COX6A1;ATP5G2;COX5B;COX5A;ATP5D;UCP2;NDUFV3;NDUFV2;NDUFV1;COX8A;NDUFA8;SURF1;NDUFA6;NDUFA5;NDUFA3;NDUFA2;SDHD;ATP5F1;COX6B1;NDUFS7;UQCRQ;NDUFS4;NDUFAB1;UQCRC1;NDUFS2							HIV infection	92/200	4.29786e-20	1.18621e-17	3.97547	177.281	FEN1;NUP107;CCNT2;ELL;NUP188;CCNH;PSIP1;AP2A1;PSMD8;PSMD9;PSMD6;XPO1;AP1G1;AP1S1;PSMD1;NELFB;BANF1;NELFCD;B2M;AP2M1;KPNA1;SUPT16H;NCBP1;NCBP2;AP1B1;LIG4;VPS37A;VPS37B;RANGAP1;GTF2F2;NUP93;PSMA3;PSMA4;PSMA1;PSME4;PSME1;ELMO1;NUP54;DOCK2;UBA52;VPS28;KPNB1;PSMD10;GTF2A1;NUP205;PSMD12;PSMD11;TSG101;PSMD14;RNMT;AAAS;PSMB10;PSMB6;PSMB7;NUP85;POLR2B;POLR2C;POLR2D;AP2S1;POLR2E;TCEB2;NUP43;POLR2G;RPS27A;P…							Integrated breast cancer pathway WP1984	56/152	2.32339e-08	2.67654e-06	2.69655	47.3991	ATF1;USP38;ARAF;BRCA1;BACH1;IMPA1;CASP3;CHEK1;AKT1;RPP38;JAK1;CHUK;RALGAPA1;NCOA3;SIRT1;CDC25A;TGFBR1;PIAS1;MSH6;CREB1;MSH2;BLM;GRN;USP16;MYCBP2;PHB;HMGCR;TFPI;CDC42;RAP1A;NUP85;E2F1;FADD;BAK1;SMAD2;UBE2F;BARD1;PLK3;SMAD4;STAT1;BAD;XRCC3;BRAF;ERAL1;CDK7;FER;RAD50;RAD51;RHEB;CDK4;BAX;ATM;KRAS;FAU;BMPR1A;ATR
	Luteal Cells	31/125	0.0330012	0.962534	1.51396	5.16444	B4GALT2;YAP1;ERRFI1;ECHS1;CHPF;ITGB5;HSPB8;PEBP1;SHB;SLC7A2;S100A16;AKT1;PLS3;PACSIN3;SNX7;MPDZ;TEAD1;TBC1D16;SH3D19;GAMT;RBFOX2;WFS1;KCTD3;KIAA1217;MYO1B;CDC42EP4;DHCR7;BCAT1;FERMT2;BCAR1;PCYOX1							PluriNetWork WP1763	83/292	6.07297e-06	0.000143461	1.83713	22.067	ITGB1;GSK3B;CDKN1A;RIF1;EHMT2;BRCA1;CTCF;RBPJ;CDC73;SOX2;ZMYM2;IPO9;TRIM28;XPO4;SUMO1;PPP2R1A;SIN3A;DPYSL2;CASP3;TRIM24;AKT1;SMARCAD1;MYBL2;JAK1;ACVR1;NCOA1;HELLS;PBRM1;IGFBP3;ATRX;ZFX;POU5F1;PIAS2;TGFBR1;MYCN;CREB1;RCN2;MTF2;IL6ST;SOS1;KPNB1;SF1;HDAC2;CTBP2;ROCK1;DHX9;ROCK2;CTR9;WDR61;HIF1A;NR2C1;RBBP4;PERP;NACC1;SPP1;MTA2;MAPK3;SUZ12;MBD3;SMAD2;GADD45GIP1;CREBBP;SMAD4;PHC1;UBE2I;KDM4C;STAT3;MBD…							Protein metabolism	154/442	6.77204e-18	1.55757e-15	2.51251	99.3288	RPL5;GALNT11;RPL30;PGAP1;GALNT13;MPI;RPL10A;RPL9;MANEA;ACTB;TOMM22;RPS15;RPS14;TUBB6;C1GALT1C1;RPS16;RPL18A;RPS19;RPL35;LONP2;PMPCA;FBXO6;RPS10;PDIA3;RPS9;ST6GAL1;FBXW5;RPS7;ALG6;EIF1AX;RPS5;FBXW9;ALG3;ALG13;BCS1L;ALG10;DPM1;DPM3;RPL27;PREB;RPL29;UBA52;RPN2;SAR1B;FUT8;MAN2A1;GRPEL2;ARSK;EIF4EBP1;SSR1;CYC1;ST3GAL1;EDEM3;HSPA9;EIF2B4;RPL41;GFPT1;TBCB;TIMM44;EIF2S2;CCT6A;RPS26;TIMM10B;RPS25;RPS28;EI…							Nonalcoholic fatty liver disease WP4396	55/155	1.34107e-07	1.28743e-05	2.54112	40.2123	GSK3B;NDUFA13;COX7B;NDUFA11;COX4I1;NDUFA10;PIK3CB;COX6A1;IKBKB;AKT2;CASP3;MLX;AKT1;COX8A;SDHD;COX6B1;NDUFS7;PIK3CA;NDUFS4;UQCRC1;NDUFS2;ATF4;PRKAA1;NDUFB8;NDUFB7;UQCRB;NDUFB11;NDUFB5;NDUFB3;NDUFB2;COX7A2;UQCR11;PIK3R1;UQCR10;COX5B;ADIPOR2;COX5A;CDC42;MAPK9;NDUFV3;CYC1;BAK1;NDUFV2;NDUFV1;MLXIP;NDUFA8;NDUFA6;NDUFA5;NDUFA3;NDUFA2;EIF2AK3;ITCH;UQCRQ;NDUFAB1;BAX
	Podocytes	37/184	0.245614	0.999996	1.15368	1.61976	YAP1;NCKAP1;KANK1;ITGB5;HSPB8;CTNND1;GOLIM4;ILDR2;PLOD2;LAMC1;EPB41L5;GJA1;CALD1;S100A16;PLS3;SNX7;MPDZ;TEAD1;SH3D19;RBFOX2;DST;ZFP91;LAMB1;CDC42BPA;MID1;QKI;CD2AP;KIAA1217;ENAH;MYO1B;FAT1;ETF1;TRIB2;DOCK1;FERMT2;BCAR1;RAI14							DNA Replication WP150	20/41	6.19895e-06	0.000143461	4.37812	52.4986	CDT1;RFC3;PCNA;MCM7;RFC1;RFC2;GMNN;MCM10;ORC4;POLA1;DBF4;ORC3;POLE2;ORC2;POLD2;MCM4;MCM5;POLE;UBA52;MCM2							Transcription	80/181	2.08895e-16	4.11822e-14	3.68545	133.062	CCNT2;ELL;CCNH;EHMT2;TTF1;LSM10;SNAPC5;PCF11;SNAPC3;MAGOH;NELFB;SNRPD3;NELFCD;PTRF;SUPT16H;NCBP1;NCBP2;HIST1H2AJ;H2AFX;TFB2M;POLRMT;GTF2F2;CDC40;HIST2H2BE;POLR1C;SNRPG;POLR1D;TFAM;SNRPE;SRSF4;SRSF5;SRSF7;HIST1H2BC;SNRPB;GTF2A1;GTF3C3;RRN3;GTF3C5;RNMT;CSTF3;CSTF2;SRSF1;HIST1H3A;POLR2B;TAF1C;POLR2C;POLR2D;POLR2E;TCEB2;POLR2G;POLR2I;SRSF11;MAPK3;POLR2L;ZNF143;RNGTT;SSB;BRF1;CBX3;TAF13;ALYREF;CPSF3;T…							Pancreatic adenocarcinoma pathway WP4263	37/89	1.62599e-07	1.33796e-05	3.28041	51.2794	CDKN1A;ARAF;PEBP1;PIK3CB;PIK3R1;IKBKB;CDC42;MAPK9;AKT2;ERBB2;E2F1;AKT1;POLK;BAK1;PAK2;JAK1;PAK4;MAPK3;SMAD2;RALBP1;SMAD4;CHUK;STAT1;BAD;STAT3;BRAF;TGFBR1;MAPK10;TIAM1;CDK6;RAD51;PIK3CA;RPS6KB1;CDK4;RPS6KB2;BAX;KRAS
	Granulosa Cells	23/112	0.269604	0.999996	1.18406	1.55207	B4GALT2;TEAD4;YAP1;NCKAP1;RBFOX2;PCGF2;LAMB1;LAMC1;MID1;ENAH;GPR176;HSD17B1;FAT1;PLS3;PACSIN3;FLNC;MPDZ;TEAD1;FERMT2;TEAD2;BCAR1;EPHA2;RAI14							IL-2 Signaling Pathway WP450	30/76	8.26186e-06	0.000167303	3.00191	35.1339	PIK3CB;YBX1;PIK3R1;SHB;CBL;CRKL;MAPK9;AKT1;EIF4E;JAK1;MAPK3;CD53;LYN;HSP90AA1;SYK;CISH;CHUK;STAT1;STAT3;PTPN11;NMI;CREB1;PIK3CA;RPS6KB1;KRAS;SOS1;STAM2;CRK;ITM2B;EIF3B							HIV life cycle	60/118	4.03726e-16	6.96427e-14	4.79864	170.092	FEN1;CCNT2;NUP107;NUP188;ELL;CCNH;PSIP1;XPO1;BANF1;NELFB;NELFCD;SUPT16H;NCBP1;NCBP2;LIG4;VPS37A;VPS37B;RANGAP1;GTF2F2;NUP93;NUP54;UBA52;VPS28;GTF2A1;NUP205;TSG101;RNMT;AAAS;NUP85;POLR2B;POLR2C;POLR2D;POLR2E;TCEB2;NUP43;POLR2G;POLR2I;RPS27A;RAE1;POLR2L;RANBP2;RANBP1;RNGTT;NUP155;XRCC4;XRCC5;TAF13;TAF10;HMGA1;NUP153;GTF2H1;GTF2H3;CDK9;CDK7;ERCC2;NUP35;TCEA1;TAF5;MNAT1;TAF1							mRNA Processing WP411	47/126	1.97353e-07	1.42094e-05	2.74606	42.3944	SF3B5;TMED10;DHX9;RNMT;CSTF3;DDX1;CSTF2;SRSF1;SRP54;DDX20;HNRNPR;YBX1;SNRPD2;SNRPD3;HNRNPA1;SF3B1;CPSF4;RBM39;RNGTT;NCBP1;NCBP2;PRMT1;CPSF3;METTL3;CPSF2;PRPF4B;PRPF40A;SMC1A;CDC40;PTBP2;LSM2;LSM7;SNRNP40;HNRNPK;PRPF18;HNRNPH1;HNRNPA2B1;SNRPG;CD2BP2;SNRPE;SRSF4;RNPS1;HNRNPH2;SREK1;SRSF5;SRSF7;SNRPB
	His Bundle Cells	20/98	0.29821	0.999996	1.17463	1.42125	NCKAP1;ITSN1;LAMB1;FGF2;PTPN14;PYGO1;AKAP12;ENAH;GJA1;PPFIBP1;CALD1;MAP1B;DPYSL3;SLIT2;MPDZ;MYH10;ZNF532;FERMT2;BMPR1A;RUNX1T1							Estrogen signaling WP1244	30/77	1.12296e-05	0.000202133	2.93786	33.4826	HDAC2;HDAC3;CCNH;ILK;BRCA1;HDAC6;IKBKB;MAPK9;SIN3A;POLR2B;POLR2C;POLR2E;AKT1;POLR2G;POLR2I;CREBBP;CHUK;TAF13;BRAF;GTF2H1;GTF2H3;GTF2F2;CDK7;NCOR1;CREB1;PIK3CA;ERCC2;TAF5;SOS1;MNAT1							Messenger RNA processing	84/203	4.20399e-15	6.44612e-13	3.28451	108.726	NUP107;NUP188;CCNH;SRP54;HNRNPR;YBX1;LSM10;SNRPD2;PCF11;MAGOH;SNRPD3;NCBP1;PRMT1;NCBP2;METTL3;PRPF40A;PRPF4B;SMC1A;GTF2F2;CDC40;PTBP2;NUP93;PRPF18;HNRNPH1;SNRPG;CD2BP2;HNRNPH2;SNRPE;SRSF4;NUP54;SREK1;SRSF5;SRSF7;SNRPB;SF3B5;NUP205;TMED10;DHX9;RNMT;CSTF3;SF3B6;DDX1;CSTF2;DDX23;SRSF1;DDX20;AAAS;NUP85;POLR2B;PCBP1;POLR2C;POLR2D;POLR2E;NUP43;POLR2G;HNRNPA1;POLR2I;RAE1;SF3B1;EIF4E;SRSF11;POLR2L;RANBP2…							Integrated Cancer Pathway WP1971	23/44	2.55797e-07	1.47692e-05	5.03908	76.4876	ATF1;SMAD2;BARD1;BLM;CDKN1A;STAT1;BAD;BRCA1;BACH1;CDC25A;MSH6;RAD50;MSH2;CDK4;CASP3;CHEK1;E2F1;CDK1;AKT1;BAX;ATM;JAK1;ATR
	Osteocytes	19/98	0.393098	0.999996	1.10139	1.02837	YAP1;MYO10;TFPI2;MID1;PTPN14;CTTNBP2NL;ENAH;GJA1;CALD1;MDK;DPYSL3;PLS3;FLNC;SLIT2;SNX7;FERMT2;MDFI;EPHA2;RAI14							G1 to S cell cycle control WP413	25/61	2.14781e-05	0.000347946	3.19394	34.33	CDKN1A;PCNA;MCM7;CCNH;PKMYT1;ORC4;CCND3;ORC3;ORC2;E2F1;E2F4;POLE;E2F6;CDC25A;CDK7;RBL1;CDK6;CDK4;POLE2;CDK1;MCM4;MCM5;ATM;MNAT1;MCM2							Mitotic G1-G1/S phases	62/135	5.74416e-14	7.92694e-12	3.93833	120.072	TOP2A;LIN54;CDKN1A;MCM7;CCNH;MCM8;MCM10;CKS1B;PSMD8;PSMD9;CCND3;PSMD6;PPP2R1B;PPP2R1A;PSMD1;MYBL2;SKP2;POLE;DYRK1A;CDC25A;CCNA2;PSMA3;DBF4;PSMA4;RBL1;PSMA1;PSME1;MCM4;MCM5;UBA52;MCM2;PSMD10;PSMD12;PSMD11;PCNA;PSMD14;LIN37;CUL1;LIN9;PKMYT1;PSMB10;PPP2CA;PSMB6;ORC4;PSMB7;RBBP4;ORC3;ORC2;E2F1;E2F4;RPS27A;CDT1;POLA1;CDK7;CDK6;PSMC6;CDK4;POLE2;PSMC1;PSMC2;CDK1;MNAT1							DNA IR-damage and cellular response via ATR WP4016	34/80	2.7161e-07	1.47692e-05	3.40599	51.4949	DCLRE1A;FEN1;PCNA;PRKDC;BRCA1;BRCC3;WRN;BRIP1;TRIM28;EXO1;CHEK1;E2F1;USP1;TOPBP1;NBN;CLSPN;TP53BP1;BARD1;RMI1;XRCC5;H2AFX;RECQL;FANCA;HUS1;SMC1A;PALB2;RAD50;RAD51;MSH2;CDK1;RAD17;ATM;MCM2;ATR
	Kidney Progenitor Cells	18/105	0.623168	0.999996	0.946749	0.447755	YAP1;NCKAP1;RBFOX2;PCGF2;MID1;ENAH;SIX4;MAP1B;FAT1;FLNC;SLIT2;TRAM1L1;MPDZ;TEAD1;FERMT2;BCAR1;PFN2;RAI14							Purine metabolism WP2185	52/171	4.61758e-05	0.000680044	2.01486	20.1144	ADK;NUDT2;PFAS;ZNRD1;GUK1;PPAT;ENPP1;PDE8A;POLE;PGM1;ADSL;PDE4D;ENTPD6;DCK;APRT;NME6;RRM2B;POLR1C;POLR1D;POLR1E;PDE5A;GART;PRPS2;PRPS1;AK1;AK2;GMPS;NT5C;DGUOK;POLR2B;POLR2C;POLD2;POLR2D;POLR2E;POLR2G;POLR2I;ADSS;POLR2L;RRM1;PNPT1;PAICS;POLE4;POLA1;POLR3B;IMPDH1;POLR3D;POLE2;IMPDH2;POLR3G;POLR3H;POLR3K;ITPA							Capped intron-containing pre-mRNA processing	62/138	1.97568e-13	2.47858e-11	3.78217	110.639	NUP107;NUP188;HNRNPR;YBX1;SNRPD2;PCF11;MAGOH;SNRPD3;NCBP1;NCBP2;METTL3;SMC1A;GTF2F2;CDC40;NUP93;HNRNPH1;SNRPG;CD2BP2;SNRPE;SRSF4;HNRNPH2;NUP54;SRSF5;SRSF7;SNRPB;SF3B5;NUP205;DHX9;CSTF3;SF3B6;CSTF2;DDX23;SRSF1;AAAS;NUP85;POLR2B;PCBP1;POLR2C;POLR2D;POLR2E;NUP43;POLR2G;HNRNPA1;POLR2I;EIF4E;RAE1;SF3B1;SRSF11;POLR2L;RANBP2;NUP155;ALYREF;CPSF3;CPSF2;NUP153;LSM2;SNRNP40;HNRNPK;HNRNPF;HNRNPA2B1;NUP35;RNP…							EGF/EGFR signaling pathway WP437	56/162	2.82051e-07	1.47692e-05	2.44066	36.8081	ATF1;ERRFI1;NDUFA13;PEBP1;AP2A1;CRKL;ELK4;GJA1;RPS6KA1;AKT1;MYBL2;MAP3K4;AP2M1;NCK1;JAK1;MEF2A;VAV3;RALBP1;PRKCI;NCOA3;EPS15L1;CREB1;RASA1;SOS1;STAM2;SOS2;CRK;PCNA;ROCK1;IQGAP1;PIK3R1;CBL;CDC42;MAPK9;ATXN2;RAP1A;ERBB2;EIF4EBP1;E2F1;AP2S1;CSK;EPS15;MAP3K2;MAP3K1;STAT1;STAT3;BRAF;PTPN11;PTPN12;PTK2;ITCH;RPS6KB1;ABI1;KRAS;RAB5A;BCAR1
	Transient Cells	20/120	0.677685	0.999996	0.914975	0.355992	CHPF;UNC5B;WFS1;TMEM50B;CTNND1;ARHGEF16;HDLBP;WASL;ATP1B1;KIAA1217;TSPAN15;GCLC;CDC42EP4;PERP;ERBB2;CTNNA1;PTGFRN;DOCK1;GPRC5C;BCAR1							Oxidative phosphorylation WP1248	24/62	9.308e-05	0.00125658	2.90363	26.9517	NDUFA8;NDUFB8;NDUFB7;NDUFA6;NDUFA11;NDUFA5;NDUFB5;NDUFA3;NDUFA10;ATP6AP2;ATP5A1;NDUFA2;NDUFB2;ATP5G3;ATP5G2;ATP5F1;ATP5G1;NDUFS7;NDUFS4;ATP5D;NDUFS2;NDUFV3;NDUFV2;NDUFV1							RNA polymerase II transcription	50/101	4.30899e-13	4.82345e-11	4.53681	129.176	CCNT2;ELL;CCNH;LSM10;PCF11;MAGOH;NELFB;SNRPD3;NELFCD;SUPT16H;NCBP1;NCBP2;GTF2F2;CDC40;SNRPG;SNRPE;SRSF4;SRSF5;SRSF7;SNRPB;GTF2A1;RNMT;CSTF3;CSTF2;SRSF1;POLR2B;POLR2C;POLR2D;POLR2E;TCEB2;POLR2G;POLR2I;SRSF11;POLR2L;RNGTT;TAF13;ALYREF;CPSF3;TAF10;CPSF2;GTF2H1;GTF2H3;CDK9;CDK7;ERCC2;TCEA1;RNPS1;TAF5;MNAT1;TAF1							Pyrimidine metabolism WP4022	35/85	4.59325e-07	2.20476e-05	3.2258	47.0757	DTYMK;NT5C;ZNRD1;POLR2B;POLR2C;POLR2D;TWISTNB;POLD2;POLR2E;ENPP1;POLR2G;TK1;UPP1;POLR2I;POLE;POLR2L;POLR2J3;RRM1;PNPT1;DCK;POLE4;POLA1;RRM2B;NME6;POLR3B;POLE2;POLR3D;POLR1C;POLR1D;CMPK1;POLR1E;POLR3G;POLR3H;DCTPP1;POLR3K
	Satellite Cells	23/139	0.698624	0.999996	0.90696	0.325275	YAP1;ERRFI1;NCKAP1;RBFOX2;TNFRSF12A;HSPB8;SCRIB;LAMB1;LAMC1;KIAA1217;ENAH;FRMD6;S100A16;ERBB2;PLS3;FLNC;SNX7;TEAD1;DOCK1;FERMT2;BCAR1;EPHA2;SH3D19							Cholesterol Biosynthesis WP103	2021-09-15	0.000333384	0.00415448	6.88063	55.0878	FDPS;IDI1;MVK;PMVK;SC5D;MVD;HMGCR;DHCR7;FDFT1							Tricarboxylic acid (TCA) cycle and respiratory electron transport	55/117	4.54383e-13	4.82345e-11	4.10813	116.752	NDUFA13;COX7B;NDUFA11;COX4I1;NDUFA10;ETFB;COX6A1;ATP5G1;NNT;BSG;IDH3B;COX8A;PDHX;SDHD;ATP5F1;COX6B1;NDUFS7;NDUFS4;UQCRC1;SUCLG2;NDUFS2;SUCLG1;DLD;NDUFB8;NDUFB7;UQCRB;NDUFB11;NDUFB5;ATP5A1;NDUFB3;ETFDH;NDUFB2;ATP5I;UQCR11;UQCR10;COX5B;COX5A;ATP5D;UCP2;CYC1;NDUFV3;NDUFV2;NDUFV1;NDUFA8;PDHA1;NDUFA6;SLC16A1;NDUFA5;IDH1;NDUFA3;NDUFA2;PDP1;SUCLA2;UQCRQ;NDUFAB1							Cytoplasmic Ribosomal Proteins WP477	35/89	1.67176e-06	7.4072e-05	2.98612	39.7202	RPL5;RPL30;RPLP1;RPLP0;RPL11;RPL10A;RPL9;RPS15;RPL7A;RPS14;RPS16;RPS15A;RPL18A;RPS19;RPS6KA1;RPL14;RPL35;RPS27A;RPL18;RPS10;RPL19;RPS9;RPL41;RPS7;RPS5;RPS26;RPS25;RPS28;RPS27;RPS6KB1;RPS6KB2;RPL27;FAU;RPL29;UBA52
	Peri-islet Schwann Cells	18/114	0.760257	0.999996	0.857518	0.235045	YAP1;NCKAP1;RBFOX2;ITSN1;ASAP3;ENAH;GJA1;TMEM98;MAP1B;TRIM2;DPYSL3;FAT1;SLIT2;MPDZ;TEAD1;PDZRN3;FERMT2;RUNX1T1							Cytoplasmic Ribosomal Proteins WP163	30/92	0.000484866	0.00561059	2.22504	16.9807	RPL30;RPLP1;RPLP0;RPL11;RPL10A;RPL9;RPS15;RPL7A;RPS14;RPS16;RPS15A;RPL18A;RPS19;RPS6KA1;RPL35;RPL18;RPS27A;RPS10;RPL19;RPL41;RPS7;RPS5;RPS26;RPS25;RPS28;RPS27;RPS6KB2;RPL27;FAU;RPL29							DNA repair	51/105	6.5038e-13	6.41089e-11	4.37089	122.653	FEN1;CCNH;MPG;BRCA1;NBN;POLE;RFC3;RFC1;RFC2;H2AFX;LIG4;LIG3;UBA52;PCNA;PRKDC;BRIP1;POLR2B;POLR2C;POLD2;POLR2D;POLR2E;USP1;POLR2G;TP53BP1;POLR2I;RPS27A;POLR2L;MBD4;XRCC4;XRCC5;FANCA;GTF2H1;GTF2H3;PALB2;FANCG;MAD2L2;SMUG1;XAB2;CDK7;RAD50;RAD51;ERCC4;APEX1;ERCC1;POLE2;ERCC2;ERCC8;TCEA1;ATM;MNAT1;ATR							DNA IR-double strand breaks and cellular response via ATM WP3959	25/55	2.29607e-06	9.44667e-05	3.83413	49.7835	YAP1;BLM;PCNA;RIF1;PRKDC;RNF8;BRCA1;SMC3;STK3;TRIM28;EXO1;CASP3;CHEK1;E2F1;NBN;BAK1;TP53BP1;H2AFX;SMC1A;RAD50;RAD51;RAD17;BAX;ATM;ATR
	Microfold Cells	19/126	0.829353	0.999996	0.811785	0.151893	GRN;TACSTD2;TULP4;ANXA11;DTX2;CAPG;SAT1;SCAMP2;TBC1D2;SYNGR2;KLF5;FABP5;MIER3;SLC22A18;MGAT1;JUNB;CTSD;S100A11;NFE2L2							G13 Signaling Pathway WP298	16/39	0.000631003	0.00681483	3.19396	23.5337	ROCK1;ROCK2;LIMK1;SRA1;PIK3CB;WASL;IQGAP1;CDC42;PPP1CB;GNA13;MAPK10;RPS6KB1;PIK3CA;CFL2;CALM1;MAP3K4							Respiratory electron transport, ATP biosynthesis by chemiosmotic coupling, and heat production by uncoupling proteins	43/81	8.65239e-13	7.9602e-11	5.23024	145.274	COX7B;NDUFA13;NDUFB8;NDUFB7;NDUFA11;UQCRB;NDUFB11;NDUFB5;COX4I1;NDUFA10;ATP5A1;NDUFB3;ETFDH;NDUFB2;ATP5I;UQCR11;ETFB;UQCR10;COX6A1;COX5B;ATP5G1;COX5A;ATP5D;UCP2;CYC1;NDUFV3;NDUFV2;NDUFV1;COX8A;NDUFA8;NDUFA6;NDUFA5;NDUFA3;NDUFA2;SDHD;ATP5F1;COX6B1;NDUFS7;UQCRQ;NDUFS4;NDUFAB1;UQCRC1;NDUFS2							MET in type 1 papillary renal cell carcinoma WP4205	26/59	2.97351e-06	0.000114183	3.62535	46.1354	CDKN1A;RPL11;ARAF;PIK3CB;PIK3R1;CBL;CRKL;CDC42;NRAS;RAP1A;AKT2;AKT1;PAK2;PAK4;MAPK3;BAD;STAT3;PTPN11;BRAF;PTK2;PIK3CA;KRAS;STRN;SOS1;CRK;SOS2
	Basal Cells	20/141	0.901642	0.999996	0.755204	0.0781921	ACADVL;CD151;TNFRSF12A;SPHK1;TACSTD2;ANXA11;ILK;ALKBH7;RHOC;HEBP2;DUSP23;KLF5;S100A16;PERP;CD9;SRSF4;TAX1BP3;CAPN1;S100A11;EPHA2							Mecp2 and Associated Rett Syndrome WP2910	18/47	0.000789757	0.00799629	2.85034	20.3622	GAMT;CNP;ARHGEF26;YBX1;CTCF;SMC3;FGF2;FUT8;REST;CREB1;NCOR1;SIN3A;HNRNPH1;HNRNPF;SP3;E2F1;TAF1;EZH2							Influenza infection	62/142	9.4565e-13	8.15623e-11	3.59218	99.4564	RPL5;RPL30;NUP107;NUP188;RPLP1;CLTC;RPLP0;RPL10A;RPL9;IPO5;RPS15;RPS14;RPL7A;RPS16;XPO1;RPL18A;RPS19;RPL35;RPS10;KPNA1;RPS9;HSP90AA1;RPS7;RPS5;GTF2F2;NUP93;DNAJC3;CANX;RPL27;NUP54;RPL29;UBA52;KPNB1;NUP205;RPL11;AAAS;RPS15A;NUP85;POLR2B;POLR2C;POLR2D;POLR2E;RPL14;NUP43;POLR2G;POLR2I;RPL18;RPS27A;RAE1;POLR2L;RPL19;RANBP2;CPSF4;RPL41;NUP155;NUP153;RPS26;RPS25;RPS28;RPS27;NUP35;FAU							Mitochondrial complex I assembly model OXPHOS system WP4324	25/56	3.44393e-06	0.000120514	3.71022	46.6705	NDUFA13;NDUFB8;NDUFB7;NDUFB11;NDUFB5;NDUFA10;NDUFB3;NDUFB2;ECSIT;FOXRED1;NDUFV3;NDUFV2;NDUFV1;NDUFA8;NDUFA6;NDUFA5;NUBPL;NDUFA3;NDUFA2;NDUFAF6;NDUFS4;NDUFAB1;NDUFS2;NDUFAF3;TMEM126B
	Hemangioblasts	13/97	0.906888	0.999996	0.707322	0.0691311	SF3B5;CISH;RHOG;NOSIP;YIF1B;LSM10;CCND3;DPM3;CCS;GUK1;RPS6KB2;RILP;SLC39A3							Kit Receptor Signaling Pathway WP407	23/67	0.000965235	0.00919812	2.40164	16.6749	LYN;GRB7;YES1;CISH;BAD;STAT1;CLTC;STAT3;PTPN11;PIK3R1;CBL;CRKL;SPRED1;RASA1;RPS6KA1;KIT;AKT1;SOS1;SOCS6;CRK;MPDZ;SOCS4;SOCS5							M phase pathway	47/96	3.59963e-12	2.92206e-10	4.43545	116.875	AHCTF1;ERCC6L;NUP107;ZWILCH;CASC5;CDCA8;SMC3;AURKB;NSL1;CENPC;SKA2;PPP2CA;PPP1CC;SGOL1;XPO1;PPP2R1B;PPP2R1A;PPP2R5E;NUP85;RAD21;NUF2;KNTC1;NUP43;CLASP1;CLASP2;RANBP2;CENPU;RCC2;KIF23;PPP2R5C;RANGAP1;SMC1A;NDC80;CENPE;CLIP1;CENPF;STAG1;RPS27;GORASP1;ZW10;CENPK;CENPM;MAPRE1;CENPQ;ITGB3BP;SPC24;PAFAH1B1							Eukaryotic Transcription Initiation WP405	21/43	3.55683e-06	0.000120514	4.38903	55.0676	CCNH;TAF13;ILK;GTF2H1;GTF2H3;GTF2F2;CDK7;POLR3B;POLR2B;POLR2C;POLR3D;ERCC2;POLR2E;POLR1D;POLR1E;POLR2G;POLR3H;TAF5;POLR2I;MNAT1;POLR3K
	Endothelial Cells (Blood Brain Barrier)	15/113	0.926275	0.999996	0.699341	0.0535584	YAP1;APP;RBFOX2;FMNL2;CAMK2N1;MAP1B;TRIM2;FAT1;MPDZ;TEAD1;DOCK1;SLC19A1;TNFRSF21;BCAR1;TBC1D16							IL-5 Signaling Pathway WP151	23/69	0.00151704	0.0131096	2.29694	14.9094	LYN;GSK3B;ITGAM;SYK;STAT1;STAT3;PTPN11;PIK3R1;CBL;YWHAZ;CRKL;DNM2;SDCBP;MAPK9;CCND3;IL5;RPS6KA1;AKT1;BAX;UNC119;KRAS;JAK1;MAPK3							Metabolism	394/1615	5.99448e-12	4.59577e-10	1.53589	39.6878	PI4K2B;NUP107;PGAP1;UXS1;ENO1;EPRS;GLS;NDST1;SCP2;NAMPT;AKT1;MLYCD;GAMT;MED1;ACOT8;MECR;MED9;PHKA2;MED7;NUP93;ETHE1;HMBS;UQCRC1;FAR1;TSTA3;NUP205;MTMR2;HS3ST3A1;RPN2;IQGAP1;AAAS;MTMR6;NUP85;ST3GAL6;LTA4H;ST3GAL1;HMOX2;FDFT1;GSTM4;ABCA1;CREBBP;EPT1;MCAT;PAFAH2;ITPA;GPI;PIGN;MTMR14;HEXB;HEXA;ADK;MED16;MED15;PFAS;MED11;MED13;SMPD4;IMPA1;RFK;TK1;ENOPH1;CHST7;TPI1;GSTO1;SPHK2;ELOVL5;SPHK1;ELOVL6;MED27…							Androgen receptor signaling pathway WP138	34/90	6.67342e-06	0.00021355	2.79607	33.3218	GSK3B;CDKN1A;ROCK1;ROCK2;UBE3A;RNF6;BRCA1;PIK3R1;RNF4;NR2C2;CDC42;SUMO1;SIN3A;BAG1;AKT1;FLNA;PATZ1;NCOA1;CREBBP;SMAD4;UBE2I;NCOA3;NCOA4;STAT3;DSTN;SIRT1;PIAS2;RUNX2;PTK2;PIAS1;RHOB;CREB1;NCOR1;STUB1
	Melanocytes	18/133	0.929241	0.999996	0.715008	0.0524726	YAP1;DST;HSPB8;LAMB1;LAMC1;PTPN14;PPFIBP1;SLK;FRMD6;ZC3H7A;GPNMB;CALD1;S100A16;ENPP1;TEAD1;DOCK1;SASH1;RAI14							Insulin Signaling WP65	44/159	0.00153754	0.0131096	1.76063	11.4046	GSK3B;PRKAA1;STXBP3;RRAD;SRF;PIK3R1;PIK3CB;PIK3C2A;CBL;IKBKB;PPP1CC;GYS1;MAPK9;KIF5B;AKT2;RPS6KA1;EIF4EBP1;AKT1;ENPP1;FLOT2;MAP2K7;MAPK6;MAP4K5;MAP3K7;EIF4E;MAP3K4;MAP4K3;MAPK3;MAP3K2;PRKCI;MAP3K1;PTPN11;MAPK10;PFKL;PIK3CA;RPS6KB1;RHEB;RPS6KB2;TRIB3;SOS1;SOS2;CRK;PFKM;RHOQ							Influenza viral RNA transcription and replication	55/125	1.23353e-11	8.95931e-10	3.63685	91.3524	RPL5;RPL30;SMG1;RPLP1;EIF4A3;RPLP0;SMG9;RPL10A;SMG7;RPL9;IPO5;RPS15;RPS14;RPL7A;RPS16;RPL18A;RPS19;PPP2R1A;MAGOH;RPL35;RPS10;UPF2;RPS9;HSP90AA1;RPS7;NCBP1;NCBP2;RPS5;GTF2F2;DNAJC3;RPL27;ETF1;RPL29;UBA52;RPL11;PPP2CA;RPS15A;POLR2B;POLR2C;POLR2D;POLR2E;RPL14;POLR2G;POLR2I;RPL18;RPS27A;POLR2L;RPL19;RPL41;RPS26;RPS25;RPS28;RPS27;RNPS1;FAU							DNA Replication WP466	20/42	9.84435e-06	0.000298439	4.17886	48.1765	CDT1;RFC3;PCNA;MCM7;RFC1;RFC2;GMNN;MCM10;ORC4;POLA1;DBF4;ORC3;POLE2;POLD2;ORC2;MCM4;MCM5;POLE;UBA52;MCM2
	Chromaffin Cells	16/122	0.939159	0.999996	0.68952	0.0432816	SLC12A2;GRIA2;SNAPIN;DST;ITSN1;SERPINE1;PIK3C2A;CDC42BPA;AKAP12;MAPK10;MAP1B;TRIM2;DPYSL3;RAPGEF2;KIF1B;FAM171B							IL-6 signaling Pathway WP387	30/99	0.00183137	0.0148341	1.99846	12.5957	GSK3B;PIK3R1;NLK;PPP2CA;PPP2R1B;PPP2R1A;PPP2R5E;CASP3;ERBB2;EIF4EBP1;AKT1;MAP3K7;EIF4E;MAP3K4;JAK1;MAPK3;LYN;NCOA1;CREBBP;HSP90AA1;BAD;STAT1;STAT3;PTPN11;PPP2R5C;PTK2;CDK9;RPS6KB1;IL6ST;SOS1							S phase	51/112	1.42542e-11	9.83536e-10	3.86766	96.5909	CDKN1A;FEN1;MCM7;CCNH;MCM8;CKS1B;PSMD8;PSMD9;PSMD6;PSMD1;SKP2;POLE;RFC3;RFC1;RFC2;CDC25A;CCNA2;PSMA3;PSMA4;PSMA1;PSME4;PSME1;MCM4;MCM5;UBA52;MCM2;PSMD10;PSMD12;PSMD11;PCNA;PSMD14;CUL1;PSMB10;PSMB6;ORC4;PSMB7;FZR1;ORC3;ORC2;POLD2;RPS27A;CDT1;GINS2;POLA1;CDK7;PSMC6;CDK4;POLE2;PSMC1;PSMC2;MNAT1							VEGFA-VEGFR2 Signaling Pathway WP3888	112/432	1.83893e-05	0.000529612	1.62145	17.6798	RPL5;CTNND1;ARPC5L;EPRS;RPL10A;GJA1;RPL18A;BSG;AKT1;PRKCI;IGFBP3;TMOD3;ADAM10;TMEM170A;DPM1;ADAM9;TFAM;RPL27;ATF4;EPHA2;PSMD11;CNP;FLII;IQGAP1;PIK3R1;PRDX2;SDCBP;RAP1A;DHX36;PGK1;INPP5K;FADD;MAP2K7;ZC3H15;CREBBP;EIF2AK3;PRRC2C;LARP7;QKI;PTK2;OCLN;GIPC1;RCAN2;CALU;SPIRE1;DHX29;RAB5A;ITGB1;ARF4;GSK3B;ITGB5;CLTC;SRP54;AP2A1;HMGB1;SHB;HERPUD1;EEA1;PBK;MLST8;PRKG1;NCK1;TEAD4;DUSP5;HSP90AA1;GPX1;SSR4;R…
	Trophoblast Stem Cells	1999-12-01	0.9555	0.999996	0.630106	0.0286828	TOM1L1;ENAH;YAP1;GRB7;MYO1B;BAIAP2L1;KRT18;SIX4;PERP;ARHGEF16;PACSIN3;PTGES							IL-3 Signaling Pathway WP373	30/100	0.0021751	0.0167794	1.96979	12.0761	ATF1;GSK3B;PIK3R1;CBL;CRKL;PPP2CA;CDC42;MAPK9;RAP1A;CHEK1;AKT1;JAK1;MAPK3;LYN;CISH;SYK;BAD;STAT1;STAT3;PTPN11;YWHAZ;PTK2;CREB1;PIK3CA;ID1;RPS6KB2;BAX;KRAS;SOS1;CRK							HIV factor interactions with host	55/128	3.82437e-11	2.51316e-09	3.48675	83.6368	NUP107;NUP188;PSIP1;AP2A1;PSMD8;PSMD9;PSMD6;XPO1;AP1G1;AP1S1;PSMD1;BANF1;B2M;AP2M1;KPNA1;AP1B1;RANGAP1;NUP93;PSMA3;PSMA4;PSMA1;PSME4;ELMO1;PSME1;NUP54;DOCK2;UBA52;KPNB1;PSMD10;NUP205;PSMD12;PSMD11;PSMD14;AAAS;PSMB10;PSMB6;PSMB7;NUP85;AP2S1;TCEB2;NUP43;RPS27A;PAK2;RAE1;RANBP2;RANBP1;NPM1;NUP155;HMGA1;NUP153;CDK9;PSMC6;PSMC1;PSMC2;NUP35							Nucleotide Excision Repair WP4753	20/44	2.33573e-05	0.000640658	3.83016	40.8471	RFC3;PCNA;RFC1;CCNH;RFC2;GTF2H1;GTF2H3;GTF2H5;CUL4A;POLE4;CDK7;ERCC4;ERCC1;POLE2;POLD2;ERCC2;ERCC8;MNAT1;POLE;CUL4B
	Trophoblast Progenitor Cells	12/103	0.969312	0.999996	0.602262	0.0187716	CDC42SE1;VASP;ISG20;FRAT2;ELL;RPS6KA1;DTX2;OSTF1;ARAP1;TMC6;JUNB;CD55							IL-7 Signaling Pathway WP297	16/44	0.00283867	0.0208257	2.62281	15.3813	LYN;GSK3B;STAT1;BAD;CLTC;STAT3;PIK3R1;CBL;CCNA2;CDK4;AKT1;BAX;SOS1;STAM2;MAPK3;JAK1							Translation	61/151	7.61697e-11	4.77792e-09	3.13874	73.1265	RPL5;RPL30;TRAM1;RPLP1;RPLP0;SRP54;RPL10A;RPL9;RPS15;RPS14;RPL7A;RPS16;RPL18A;RPS19;RPL35;RPS10;EIF5B;RPS9;RPS7;SSR4;EIF1AX;RPS5;DDOST;SRP9;EEF1D;RPL27;ETF1;RPL29;UBA52;RPN2;RPL11;RPS27L;MRPL13;RPS15A;SRP72;EIF4EBP1;RPL14;SSR1;RPL18;RPS27A;EIF4E;RPL19;EIF2B4;RPL41;EIF2S2;RPS26;RPS25;SPCS3;RPS28;EIF5;RPS27;EIF3G;EIF3H;EIF3E;RPL22L1;EIF3F;FAU;RSL24D1;EIF3D;EIF3A;EIF3B							Leptin signaling pathway WP2034	29/76	2.48855e-05	0.000651547	2.83913	30.0983	GSK3B;KHDRBS1;PRKAA1;ROCK1;ROCK2;PIK3R1;IKBKB;CDC42;CFL2;RPS6KA1;ERBB2;EIF4EBP1;AKT1;KPNA4;EIF4E;JAK1;MAPK3;NCOA1;CISH;CHUK;STAT1;BAD;STAT3;PTPN11;PTK2;CREB1;RPS6KB1;BAX;SOS1
	Choroid Plexus Cells	14/117	0.969915	0.999996	0.620669	0.0189592	NCKAP1;WFS1;CTNND1;SLC4A2;ATP1B1;KIAA1217;TMEM98;TRIM2;CDC42EP4;CHMP1A;MPDZ;TEAD1;PDZRN3;BCAR1							Proteasome Degradation WP519	18/52	0.00298721	0.0208257	2.43043	14.1291	PSMD12;PSMD11;RPN2;H2AFX;UBE2D1;PSMB10;PSMD8;PSMB6;PSMD9;PSMB7;PSMD6;PSMA3;PSMA4;PSMC6;PSMC1;PSMC2;PSME1;UBA1							Huntington's disease	70/184	8.22559e-11	4.93535e-09	2.84664	66.1023	COX7B;COX4I1;NDUFA10;CLTC;CLTB;AP2A1;ATP5G3;COX6A1;ATP5G2;ATP5G1;SIN3A;CASP3;IFT57;AP2M1;TGM2;COX8A;GPX1;SDHD;ATP5F1;COX6B1;CREB3;CREB1;NDUFS7;NDUFS4;UQCRC1;TFAM;NDUFS2;CREB5;HDAC2;NDUFB8;NDUFB7;UQCRB;DCTN2;NDUFB5;DCTN4;ATP5A1;NDUFB3;NDUFB2;HTT;COX7A2;UQCR11;NRF1;UQCR10;COX5B;COX5A;POLR2B;POLR2C;ATP5D;POLR2D;AP2S1;POLR2E;POLR2G;CYC1;NDUFV3;NDUFV2;POLR2I;NDUFV1;POLR2L;POLR2J3;NDUFA8;CREBBP;NDUFA6;…							TGF-beta Signaling Pathway WP366	43/132	3.41731e-05	0.000855814	2.22618	22.8942	ITGB1;YAP1;APP;CDKN1A;ROCK1;ZFYVE9;CUL1;PIK3R1;CDC42;MAPK9;SUMO1;SIN3A;AKT1;E2F4;MAP3K7;JUNB;SKIL;PAK2;RNF111;SPTBN1;MEF2A;SMAD2;TRAP1;SMAD4;CREBBP;UBE2I;WWP1;NUP153;PIAS2;RUNX2;PTK2;TGFBR1;UCHL5;PIAS1;PPM1A;ITCH;ZFYVE16;SNW1;RBL1;CDK1;STRAP;SOS1;BCAR1
	Erythroblasts	15/124	0.97038	0.999996	0.628341	0.0188928	VASP;ITGB1;TFRC;ARPC1B;RHOG;ZC3HAV1;NMI;CCND3;ELF1;WRN;KIT;RGS10;FXYD5;DOCK2;SH2B3							Nucleotide Metabolism WP87	2021-09-19	0.00308529	0.0208257	4.12737	23.8608	PRPS2;PRPS1;POLA1;RRM1;ADSL;RRM2B;IMPDH1;SAT1;ADSS							Generic transcription pathway	116/377	6.83162e-10	3.92818e-08	2.06891	43.6628	CCNT2;SERPINE1;UBE2D1;CCNC;RBPJ;TRIM28;ZSCAN32;ZNF568;ZNF446;ZNF567;ZNF445;JUNB;RNF111;ZNF443;ZNF200;ZNF17;ZNF320;MED1;ZNF440;ZNF282;ZNF160;ZNF12;ZNF14;RUNX2;MED7;ZNF92;TBL1XR1;ZNF558;UBA52;ZNF433;ZNF432;ZNF28;ZNF430;ZNF274;ZNF273;ZNF25;ZNF426;ZNF302;SKIL;ZNF267;ZKSCAN1;NR2C2AP;ZNF266;ZNF420;SMAD2;CREBBP;SMAD4;ZNF141;ZNF383;NR1D2;CDK9;ZFP69;SNW1;ZNF417;ZNF415;ZNF138;ZNF257;ZNF254;ZNF253;ZNF493;CH…							Cholesterol Biosynthesis Pathway WP197	2021-10-15	4.21519e-05	0.00101164	9.17729	92.4542	FDPS;IDI1;MVK;CYP51A1;PMVK;SC5D;MVD;HMGCR;DHCR7;FDFT1
	Tanycytes	14/121	0.979133	0.999996	0.59732	0.012596	MAPK10;GJA1;VCAN;RGCC;MAP1B;RCAN2;TRIM2;DPYSL3;SLIT2;CRYM;MPDZ;PDZRN3;PRKG1;RUNX1T1							Glycogen Metabolism WP317	13/34	0.00418355	0.0271094	2.8402	15.5546	GSK3B;PYGB;AGL;PHKB;PPP2R5C;PHKA2;PPP2CA;GYS1;UGP2;PPP2R1B;PPP2R5E;PPP2R1A;CALM1							Cell cycle checkpoints	49/117	1.2683e-09	7.00101e-08	3.33015	68.2201	CDKN1A;MCM7;MCM8;UBE2D1;MCM10;PSMD8;PSMD9;PSMD6;CDC23;CDC27;CHEK1;PSMD1;RFC3;RFC2;HUS1;CDC25A;PSMA3;DBF4;PSMA4;PSMA1;PSME4;PSME1;MCM4;MCM5;UBA52;ANAPC1;MCM2;PSMD10;PSMD12;PSMD11;PSMD14;ANAPC10;PSMB10;ANAPC11;PSMB6;ORC4;PSMB7;ORC3;ORC2;CLSPN;RPS27A;UBE2C;PSMC6;PSMC1;PSMC2;CDK1;RAD17;ATM;ATR							miRNA regulation of DNA damage response WP1530	27/71	5.02106e-05	0.00115685	2.82249	27.9406	CDKN1A;MCM7;PRKDC;BRCA1;CCND3;CASP3;CHEK1;TLK2;E2F1;TLK1;NBN;RFC1;H2AFX;SMC1A;CDC25A;RAD50;CREB1;CDK6;RAD51;RRM2B;CDK4;CCNG1;CDK1;RAD17;BAX;ATM;ATR
	M?ller Cells	17/147	0.987027	0.999996	0.596651	0.00779111	SEMA5A;HSPB8;SOX2;MAPK10;GJA1;CNR2;S100A16;CA2;RCAN2;TRIM2;DPYSL3;KIT;ATG4B;CRYM;MPDZ;PDZRN3;ITM2B							Translation Factors WP307	17/50	0.00475369	0.0296191	2.36444	12.647	EIF2B4;EIF2AK3;EIF2S2;EIF5;EIF6;EEF1D;EIF4EBP1;EIF3G;EIF3H;ETF1;EIF3E;EIF3F;EIF4E;EIF3D;EIF4G3;EIF3A;EIF3B							Protein processing in the endoplasmic reticulum	62/166	2.26472e-09	1.19878e-07	2.75916	54.9233	TRAM1;NGLY1;UBE2D1;HERPUD1;MAN1A2;FBXO6;CAPN1;SEC62;SIL1;UBXN6;SEC63;PDIA3;HSP90AA1;SSR4;UBE2E2;UBE4B;YOD1;DDOST;DNAJC3;DNAJB11;CANX;PLAA;PREB;VIMP;ATF4;SEC23A;RPN2;SAR1B;HSPA4L;SEL1L;CUL1;HSPBP1;HSP90B1;ATXN3;ERLEC1;LMAN1;MAPK9;HSPH1;BAG1;MAN1C1;UBQLN1;SSR1;BAK1;MAP2K7;UGGT2;UBQLN4;UGGT1;EDEM3;BCAP31;SEC24A;HSPA5;WFS1;EIF2AK3;EIF2AK4;SVIP;MAPK10;DNAJC10;BAX;STUB1;STT3B;SEC24D;NFE2L2							RAC1/PAK1/p38/MMP2 Pathway WP3303	26/68	6.17391e-05	0.00136776	2.84692	27.5941	ITGB1;YAP1;GRB7;PIK3R1;IKBKB;MAPK9;NRAS;ERBB2;EIF4EBP1;AKT1;NCK1;MAPK3;CHUK;ANGPT1;BAD;STAT3;PTPN11;PTK2;RAD51;PIK3CA;MSH2;RASA1;BAX;KRAS;SOS1;CRK
	Myoblasts	14/126	0.987029	0.999996	0.570479	0.00744802	YAP1;TNFRSF12A;TPM2;HSPB8;BRAF;LAMB1;CALD1;CAPN1;FLNC;TEAD1;PDZRN3;FERMT2;PRKG1;BCAR1							Exercise-induced Circadian Regulation WP544	16/49	0.00934107	0.0560464	2.22473	10.3969	NCKAP1;IDI1;RBPMS;CBX3;NCOA4;ZFR;NR1D2;AZIN1;HERPUD1;PURA;PSMA4;UGP2;SUMO1;VAPA;KLF9;TAB2							DNA replication pre-Initiation	40/88	2.34545e-09	1.19878e-07	3.84612	76.4254	PSMD10;CDKN1A;PSMD12;PSMD11;MCM7;PSMD14;MCM8;GMNN;MCM10;PSMB10;PSMD8;PSMB6;PSMD9;ORC4;PSMB7;PSMD6;FZR1;ORC3;ORC2;E2F1;PSMD1;RPS27A;POLE;CDT1;CCNA2;POLA1;PSMA3;DBF4;PSMA4;PSMC6;PSMA1;POLE2;PSMC1;PSME4;PSMC2;PSME1;MCM4;MCM5;UBA52;MCM2							Electron Transport Chain (OXPHOS system in mitochondria) WP111	35/103	6.76315e-05	0.0014428	2.3693	22.7487	COX7B;NDUFB8;NDUFB7;UQCRB;NDUFB5;COX4I1;NDUFA10;NDUFB3;NDUFB2;COX7A2;UQCR11;UQCR10;COX6A1;COX5B;COX5A;UCP2;COX11;NDUFV3;NDUFV2;NDUFV1;COX8A;NDUFA8;SURF1;NDUFA6;NDUFA5;NDUFA3;NDUFA2;SDHD;COX6B1;NDUFS7;UQCRQ;NDUFS4;NDUFAB1;UQCRC1;NDUFS2
	Mammary Epithelial Cells	15/134	0.988151	0.999996	0.575187	0.00685636	GRB7;WNT5B;ARHGEF16;STAT3;TACSTD2;TMEM61;RUNX2;BAIAP2L1;KLF5;KRT18;S100A16;EPCAM;PERP;ERBB2;EPHA2							Non-homologous end joining WP1242	2021-04-06	0.0113753	0.0641156	9.1636	41.0191	RAD50;XRCC4;XRCC5;PRKDC							Antigen presentation: folding, assembly, and peptide loading of class I MHC proteins	84/255	4.72859e-09	2.33052e-07	2.27842	43.6764	UBE3C;ITGB5;KEAP1;UBE2D1;UBE3A;PSMD8;PSMD9;NPEPPS;PSMD6;CDC23;UBE2Q2;CDC27;MRC1;FBXO3;PSMD1;FBXO6;SKP2;B2M;RNF111;PDIA3;WSB1;UBE2E2;UBE4A;PJA2;RNF41;PSMA3;PSMA4;PSMA1;PSME4;CANX;PSME1;UBE2V2;UBA52;ANAPC1;PSMD10;ANAPC13;PSMD12;SEC23A;PSMD11;PSMD14;SAR1B;UBA6;CUL3;CUL1;UBR2;RNF6;UBR1;RNF4;ANAPC10;PSMB10;ANAPC11;PSMB6;PSMB7;FZR1;TCEB2;RPS27A;UBE2F;UBE2H;SEC24A;HSPA5;UBE2C;RNF25;WWP1;KLHL20;KLHL9;UBE…							Mitochondrial complex III assembly WP4921	2021-10-16	9.42775e-05	0.00193942	7.64728	70.8847	UQCRB;UQCC2;UQCRQ;LYRM7;UQCRC1;UQCR11;UQCR10;CYC1;BCS1L;TTC19
	Glomus Cells	14/127	0.988233	0.999996	0.565396	0.00669252	RBFOX2;HSPB8;GJA1;CALD1;MAP1B;DPYSL3;SLIT2;IL6ST;MPDZ;TEAD1;PDZRN3;HMOX2;FERMT2;BCAR1							Alpha6-Beta4 Integrin Signaling Pathway WP488	20/67	0.011698	0.0641156	1.95308	8.68795	SMAD2;CDKN1A;CD151;YES1;DST;BAD;LAMB1;PIK3CB;LAMC1;PIK3R1;YWHAZ;PTK2;PIK3CA;EIF6;CASP3;ERBB2;EIF4EBP1;AKT1;EIF4E;PLEC							HIV genome transcription	31/61	5.27379e-09	2.5096e-07	4.76234	90.7727	GTF2A1;CCNT2;ELL;CCNH;RNMT;POLR2B;POLR2C;POLR2D;POLR2E;TCEB2;NELFB;POLR2G;NELFCD;POLR2I;POLR2L;SUPT16H;RNGTT;NCBP1;NCBP2;TAF13;TAF10;GTF2H1;GTF2H3;GTF2F2;CDK9;CDK7;ERCC2;TCEA1;TAF5;MNAT1;TAF1							Purine metabolism and related disorders WP4224	2021-12-22	0.000117032	0.00232449	5.50778	49.8623	PRPS1;DGUOK;ADSL;RRM2B;IMPDH1;PPAT;PFAS;PAICS;ADSS;GART;ITPA;APRT
	Urothelial Cells	11/106	0.988941	0.999996	0.528551	0.00587796	ABHD11;SYNGR2;SLC22A18;CDC42BPG;RPS6KB2;TACSTD2;ANXA11;DTX2;CAPN1;NADSYN1;SCAMP2							Signaling of Hepatocyte Growth Factor Receptor WP193	1934-12-01	0.0119845	0.0641156	2.5017	11.0679	ITGB1;RAP1A;PIK3CA;RASA1;STAT3;PTPN11;SOS1;CRK;DOCK1;PTK2;CRKL;MAPK3							Oxidative phosphorylation	53/136	5.85715e-09	2.69429e-07	2.95166	55.9506	COX7B;NDUFA11;COX4I1;NDUFA10;ATP5G3;COX6A1;ATP5G2;ATP5G1;COX8A;ATP6V1G1;ATP6V0B;ATP6V0E1;ATP6AP2;SDHD;ATP5F1;COX6B1;NDUFS7;NDUFS4;UQCRC1;ATP6V1B2;NDUFS2;ATP6V1A;NDUFB8;NDUFB7;UQCRB;NDUFB5;ATP5A1;NDUFB3;NDUFB2;ATP5I;COX7A2;UQCR11;UQCR10;COX5B;COX5A;ATP5D;COX11;CYC1;NDUFV3;NDUFV2;ATP6V1D;NDUFV1;ATP6V1C1;COX10;ATP6V1F;LHPP;NDUFA8;NDUFA6;NDUFA5;NDUFA3;NDUFA2;UQCRQ;NDUFAB1							ErbB signaling pathway WP673	31/91	0.000163099	0.00313149	2.37681	20.7285	GSK3B;CDKN1A;CAMK2D;ARAF;PIK3CB;PIK3R1;CBL;CRKL;MAPK9;NRAS;AKT2;ERBB2;EIF4EBP1;AKT1;ABL2;MAP2K7;PAK2;NCK1;PAK4;MAPK3;BAD;BRAF;PTK2;MAPK10;PIK3CA;RPS6KB1;RPS6KB2;KRAS;SOS1;CRK;SOS2
	Meningeal Cells	12/115	0.990756	0.999996	0.531704	0.00493812	GJA1;CALD1;MAP1B;HSPB8;DPYSL3;LAMB1;SLIT2;MPDZ;PDZRN3;FERMT2;PRKG1;RUNX1T1							Mismatch repair WP1257	2021-05-09	0.012269	0.0641156	5.72815	25.2077	MSH6;PCNA;RFC1;MSH2;EXO1							Membrane trafficking	52/133	7.12253e-09	3.17068e-07	2.967	55.661	TFRC;CLTC;AP4E1;CLTB;ARRB1;PIK3C2A;CLINT1;GJA1;AP1G1;AP1S1;VPS36;AP2M1;SH3D19;AP1B1;AP3B1;VPS37A;VPS37B;DNM2;PREB;CHMP6;STAM2;UBA52;VPS25;CHMP7;VPS28;NAPA;COPB2;SEC23A;TSG101;SAR1B;COPB1;VPS4B;VPS4A;TGOLN2;BLOC1S6;SNX2;BLOC1S1;SNX9;RPS27A;SNX5;SNAPIN;SEC24A;SORT1;VTA1;SNF8;IGF2R;ARCN1;CPD;CHMP2B;SEC24D;COPE;PICALM							DNA damage response WP707	25/68	0.000176893	0.00314421	2.67285	23.0933	CDKN1A;PRKDC;BRCA1;CCND3;CASP3;CHEK1;TLK2;E2F1;TLK1;NBN;RFC1;H2AFX;SMC1A;CDC25A;RAD50;CREB1;CDK6;RAD51;RRM2B;CDK4;CDK1;RAD17;BAX;ATM;ATR
	Adipocyte Progenitor Cells	11/115	0.995892	0.999996	0.482544	0.00198623	ENAH;YAP1;CALD1;PLS3;LAMB1;LAMC1;SLIT2;TEAD1;FERMT2;TEAD2;SH3D19							Glutathione and one carbon metabolism WP730	1931-11-01	0.0151904	0.0769016	2.52215	10.5605	GCLC;AHCY;MTRR;GPX1;GPX4;IDH1;GSS;MTR;MAT2B;GGT1;GCLM							Asparagine N-linked glycosylation	38/85	1.03265e-08	4.45331e-07	3.72968	68.5834	B4GALT2;B4GALT3;SEC23A;RPN2;SAR1B;MPI;MANEA;GMPPB;LMAN1;FUT8;MAN1A2;MAN2A1;GMPPA;PGM3;MAN1C1;MGAT3;GNPNAT1;MGAT1;MGAT2;UGGT2;UGGT1;PDIA3;EDEM3;ST6GAL1;SEC24A;ALG6;GFPT1;ALG13;ALG3;ALG10;DDOST;DPM1;DPM3;DOLPP1;CANX;MGAT4B;PREB;SEC24D							Regulation of Microtubule Cytoskeleton WP2038	19/46	0.000180919	0.00314421	3.23285	27.859	GSK3B;ROCK1;STAT3;LIMK1;AURKB;CDC42;TIAM1;SPRED1;CLIP1;APC;PIK3CA;CFL2;DPYSL2;MAP1B;GNAQ;CDK1;AKT1;MAPRE1;CLASP1
	Myoepithelial Cells	11/115	0.995892	0.999996	0.482544	0.00198623	YAP1;CNN1;FRMD6;S100A16;GRWD1;SPHK1;PERP;ERBB2;TACSTD2;MDFI;EPHA2							TGF Beta Signaling Pathway WP113	16/52	0.0169771	0.0833422	2.03897	8.3106	SMAD2;CREBBP;SMAD4;ZFYVE9;STAT1;SERPINE1;STAT3;SMAD9;SMAD5;TGFBR1;RUNX2;MAPK9;SPP1;SKIL;JAK1;MAPK3							Signaling by TGF-beta receptor complex	32/66	1.32352e-08	5.5347e-07	4.33778	78.689	CCNT2;ZFYVE9;SERPINE1;UBE2D1;CCNC;FURIN;F11R;PPP1CB;PPP1CC;XPO1;PMEPA1;E2F4;RPS27A;JUNB;SKIL;RNF111;SMAD2;SMAD4;TGIF2;USP9X;ARHGEF18;TGFBR1;UCHL5;PPP1CA;CDK9;PPM1A;NCOR1;RBL1;STRAP;STUB1;UBA52;TRIM33							miR-517 relationship with ARCN1 and USP1 WP3596	2021-05-05	0.000184881	0.00314421	82070	705457	CDKN1A;ID2;ID1;USP1;ARCN1
	Spermatozoa	10/108	0.996184	0.999996	0.465575	0.00178	ABCA1;DNAJC3;KCNE1;MTMR10;ASAH1;ALDH2;CHL1;MRC1;ST3GAL6;EVI5							Cholesterol metabolism (includes both Bloch and Kandutsch-Russell pathways) WP4346	15/49	0.021402	0.101974	2.02365	7.77947	ABCA1;IDI1;FDPS;MVK;GGPS1;ELOVL5;NR1H2;ACSL3;HMGCR;SOAT1;PMVK;SC5D;MVD;DHCR7;FDFT1							Mitotic G2-G2/M phases	38/87	2.25159e-08	9.05953e-07	3.57701	62.9877	CEP57;DYNC1I2;NUMA1;DCTN2;CCNH;TUBGCP2;DCTN3;CCP110;PKMYT1;ACTR1A;PCM1;XPO1;PPP2R1A;E2F1;CEP192;PCNT;YWHAG;CLASP1;CDK5RAP2;CEP78;PLK4;DYNC1H1;HSP90AA1;CEP135;CEP131;TUBB4B;CDC25A;CCNA2;NEDD1;CDK7;CENPJ;CDK1;FGFR1OP;CEP63;CEP41;MAPRE1;MNAT1;PAFAH1B1							Non-small cell lung cancer WP4255	26/72	0.000185596	0.00314421	2.59873	22.3281	CDKN1A;ARAF;PIK3CB;PIK3R1;STK4;RXRB;NRAS;CASP3;AKT2;ERBB2;E2F1;AKT1;POLK;BAK1;MAPK3;BAD;STAT3;BRAF;EML4;CDK6;PIK3CA;CDK4;BAX;KRAS;SOS1;SOS2
	Pulmonary Alveolar Type I Cells	13/131	0.996316	0.999996	0.502469	0.00185473	YAP1;GRB7;IGFBP3;HSPB8;CTNND1;KIAA1217;S100A16;PERP;ERBB2;TEAD1;DOCK1;EPHA2;SH3D19							Acetylcholine Synthesis WP175	2021-04-07	0.0227923	0.105496	6.10869	23.099	PDHA2;PCYT1A;PDHA1;PEMT							Integrated breast cancer pathway	56/152	2.32339e-08	9.05953e-07	2.69655	47.3991	ATF1;USP38;ARAF;BRCA1;BACH1;IMPA1;CASP3;CHEK1;AKT1;RPP38;JAK1;CHUK;RALGAPA1;NCOA3;SIRT1;CDC25A;TGFBR1;PIAS1;MSH6;CREB1;MSH2;BLM;GRN;USP16;MYCBP2;PHB;HMGCR;TFPI;CDC42;RAP1A;NUP85;E2F1;FADD;BAK1;BARD1;SMAD2;UBE2F;PLK3;SMAD4;BAD;STAT1;XRCC3;BRAF;ERAL1;CDK7;FER;RAD50;RAD51;CDK4;RHEB;BAX;ATM;KRAS;FAU;ATR;BMPR1A							nsp1 from SARS-CoV-2 inhibits translation initiation in the host cell WP5027	2021-10-17	0.000192102	0.00316146	6.55441	56.0893	EIF5;EIF1AX;EIF3G;EIF3H;EIF3E;EIF3F;EIF2S2;EIF3D;EIF3A;EIF3B
	Bergmann Glia	13/132	0.996694	0.999996	0.498216	0.00164966	ITGB1;GRIA2;CA10;OPALIN;MAPK10;UFL1;GJA1;CHL1;RUFY3;TTC21B;CDC42EP4;BAALC;KIF1B							Integrin-mediated Cell Adhesion WP6	26/100	0.0279033	0.125565	1.61266	5.77174	ITGB1;ITGAM;ITGB5;ROCK1;ROCK2;ARAF;ILK;CDC42;RAP1A;CAPN7;AKT2;AKT1;CSK;CAPN1;MAPK6;PAK2;PAK4;VASP;VAV3;BRAF;PTK2;MAPK10;SOS1;DOCK1;CRK;BCAR1							Cytoplasmic ribosomal proteins	44/108	2.36336e-08	9.05953e-07	3.17352	55.729	RPL5;RPL30;RPLP1;RPLP0;RPL11;RPL10A;RPL9;RPS15;RPS14;RPL7A;RPS16;RPS15A;RPL18A;RPS19;RPS6KA1;RPL14;RPL35;RPL18;RPS27A;RPS10;RPL19;RPS9;RPL41;RPS7;EIF1AX;RPS5;RPS26;DNAJC3;RPS25;RPS28;RPS27;RPS6KB1;RPS6KB2;EIF3G;EIF3H;RPL27;EIF3E;EIF3F;FAU;RPL29;UBA52;EIF3D;EIF3A;EIF3B							7q11.23 copy number variation syndrome WP4932	34/104	0.000200218	0.00320348	2.23494	19.033	BECN1;HDAC2;TSG101;HDAC3;PCNA;CLTC;DDX21;HDAC6;ABHD11;BCL7B;SF3B1;PRKG1;CLASP1;GTF2I;CLASP2;MAPK3;ATPAF2;RFC2;H2AFX;LIMK1;HMGA1;SMARCA5;EIF2AK3;VPS37A;VPS37B;DEK;BAZ1B;USF1;TBL2;MYBBP1A;DNAJC30;DLD;VPS28;ATF4
	Luminal Epithelial Cells	14/140	0.996889	0.999996	0.506657	0.00157881	SLC12A2;GRB7;ARHGEF16;TACSTD2;HMGA1;TMEM61;HIF1A;UXT;KLF5;KRT18;EPCAM;PERP;ERBB2;CD9							MicroRNAs in Cardiomyocyte Hypertrophy WP1560	22/82	0.0293065	0.128315	1.68251	5.93917	GSK3B;CAMK2D;CISH;CHUK;ROCK1;ROCK2;STAT3;PIK3CB;PIK3R1;FGF2;LRP6;IKBKB;CDK9;CDK7;PIK3CA;AKT2;AKT1;IL6ST;MAP2K7;CALM1;PRKG1;MAPK3							Nucleotide excision repair	29/58	2.62701e-08	9.79802e-07	4.60641	80.4041	PCNA;CCNH;POLR2B;POLR2C;POLD2;POLR2D;POLR2E;POLR2G;POLR2I;POLE;POLR2L;RFC3;RFC1;RFC2;GTF2H1;GTF2H3;GTF2H5;CUL4A;POLE4;XAB2;CDK7;ERCC4;ERCC1;POLE2;ERCC2;ERCC8;TCEA1;MNAT1;CUL4B							IL-6 signaling pathway WP364	18/43	0.000217478	0.00338561	3.3072	27.891	NCOA1;GSK3B;CREBBP;STAT1;BAD;STAT3;PTPN11;PRDM1;PIK3R1;NLK;RPS6KB1;AKT1;SOS1;IL6ST;MAP3K7;JUNB;JAK1;MAPK3
	Trichocytes	9/103	0.997273	0.999996	0.436833	0.00119269	GRB7;BAIAP2L1;KLF5;KRT18;S100A16;PERP;ARHGEF16;DSG2;EPHA2							MAPK signaling pathway WP493	38/159	0.0343779	0.146558	1.44217	4.8606	SRF;ARRB1;NLK;ECSIT;CRKL;STK3;IKBKB;CDC42;MAPK9;NRAS;RAP1A;AKT2;CASP3;AKT1;FLNA;MAP2K7;MAPK6;MAP3K7;PAK2;MAP3K4;MAP4K3;MAPK3;DUSP5;MAP3K1;HSPA5;BRAF;TGFBR1;MAPK10;PPM1A;PPP5C;PPM1B;RASA1;TAOK2;TAB2;KRAS;SOS2;CRK;ATF4							Cyclin A-Cdk2-associated events at S phase entry	33/72	4.50492e-08	1.636e-06	3.89974	65.9661	PSMD10;CDKN1A;PSMD12;PSMD11;PSMD14;CCNH;CUL1;PKMYT1;PSMB10;CKS1B;PSMD8;PSMB6;PSMD9;PSMB7;PSMD6;FZR1;PSMD1;SKP2;RPS27A;CDC25A;CCNA2;PSMA3;CDK7;PSMA4;PSMC6;PSMA1;CDK4;PSMC1;PSME4;PSMC2;PSME1;MNAT1;UBA52							Chromosomal and microsatellite instability in colorectal cancer WP4216	26/73	0.000239606	0.00363192	2.54328	21.2021	GSK3B;CDKN1A;ARAF;MAPK9;TBK1;CASP3;AKT2;AKT1;POLK;BAK1;APPL1;MAPK3;SMAD2;SMAD4;DCC;CSNK1A1;BAD;BRAF;TGFBR1;MSH6;MAPK10;MSH2;APC;MSH3;BAX;KRAS
	Sertoli Cells	16/158	0.997787	0.999996	0.513576	0.0011378	GAMT;DOCK6;YAP1;ITGB5;HSPB8;NR1H2;CST3;RXRB;OCLN;S100A16;CDC42EP4;HSD17B1;ERBB2;NF2;GPRC5C;CD55							TCA Cycle WP434	2021-10-31	0.0391609	0.162668	2.18294	7.07289	PDP1;PDHX;PDHA2;PDHA1;SUCLA2;IDH3B;SUCLG2;SUCLG1;SDHD;DLD							Dual incision reaction in TC-NER	18/28	7.32022e-08	2.52548e-06	8.27556	135.968	CCNH;GTF2H1;GTF2H3;XAB2;CDK7;POLR2B;ERCC4;POLR2C;ERCC1;POLR2D;ERCC2;POLR2E;ERCC8;TCEA1;POLR2G;POLR2I;MNAT1;POLR2L							Interleukin-11 Signaling Pathway WP2332	18/44	0.000306825	0.00453157	3.1798	25.7222	ATF1;YES1;CHUK;STAT1;IL11RA;STAT3;PTPN11;PIK3R1;RUNX2;PIAS1;IKBKB;CREB1;RPS6KB1;RPS6KA1;AKT1;IL6ST;JAK1;MAPK3
	Alpha Cells	13/136	0.997871	0.999996	0.481896	0.00102686	PCSK2;GLS;MAPK10;TMEM98;CAMK2N1;RCAN2;TRIM2;RESP18;UCP2;PEMT;FXYD5;PDZRN3;RUNX1T1							Mitochondrial Gene Expression WP1263	2021-07-19	0.0402377	0.162963	2.67333	8.58926	CREB1;TFAM;TFB2M;NRF1;POLRMT;PPRC1;GABPA							Messenger RNA capping	18/28	7.32022e-08	2.52548e-06	8.27556	135.968	RNGTT;NCBP1;CCNH;RNMT;NCBP2;GTF2H1;GTF2H3;GTF2F2;CDK7;POLR2B;POLR2C;POLR2D;ERCC2;POLR2E;POLR2G;POLR2I;MNAT1;POLR2L							Endometrial cancer WP4155	23/63	0.000356168	0.00500372	2.64245	20.9813	GSK3B;CDKN1A;BAD;ARAF;ILK;BRAF;PIK3CB;PIK3R1;FGF2;NRAS;PIK3CA;APC;AKT2;ERBB2;CTNNA1;AKT1;BAX;KRAS;POLK;BAK1;SOS1;SOS2;MAPK3
	Hepatoblasts	10/114	0.998133	0.999996	0.438554	0.000819437	TOM1L1;GRB7;BAIAP2L1;KRT18;EPCAM;ARHGEF16;DSG2;GGT1;SMAD5;GPRC5C							Histone modifications WP300	2021-03-05	0.0432301	0.167962	6.87078	21.5826	HDAC2;EHMT2;HAT1							Messenger RNA splicing: minor pathway	23/42	8.23646e-08	2.77227e-06	5.57019	90.8615	SF3B5;NCBP1;NCBP2;SF3B6;DDX23;SRSF1;GTF2F2;LSM2;SNRNP40;SNRPD2;POLR2B;POLR2C;POLR2D;POLR2E;SNRPG;POLR2G;SNRPE;SNRPD3;POLR2I;SF3B1;SRSF7;POLR2L;SNRPB							Genotoxicity pathway WP4286	23/63	0.000356168	0.00500372	2.64245	20.9813	IKBIP;ARRDC4;PLK3;CDKN1A;SEL1L;CCP110;AEN;SMAD5;CENPE;TP53I3;RPS27;DAAM1;RRM2B;BLOC1S2;BRMS1L;ID2;RBM12B;B3GNT2;RAPGEF2;HIST1H2BG;TRIM22;E2F7;HIST1H2BC
	Pancreatic Progenitor Cells	10/114	0.998133	0.999996	0.438554	0.000819437	KIAA1217;ENAH;YAP1;PCGF2;ARHGEF16;CKB;ATP1B1;TEAD1;SLC7A2;BCAR1							Regulation of Actin Cytoskeleton WP523	36/152	0.0435456	0.167962	1.42479	4.46521	NCKAP1;ROCK1;ROCK2;BRK1;PIK3R1;IQGAP1;PIK3CB;PIK3C2A;FGF2;ACTB;CDC42;GNA13;NRAS;CFL2;CSK;MAPK6;MYH10;PAK2;GIT1;PAK4;MAPK3;PPP1R12A;RDX;LIMK1;BRAF;PTK2;ENAH;DIAPH3;PIK3CA;APC;KRAS;SOS1;SOS2;DOCK1;CRK;BCAR1							Electron transport chain	42/105	9.07595e-08	2.9522e-06	3.07581	49.8744	COX7B;NDUFB8;NDUFB7;UQCRB;NDUFB5;COX4I1;NDUFA10;ATP5A1;NDUFB3;NDUFB2;ATP5I;COX7A2;UQCR11;ATP5G3;UQCR10;COX6A1;ATP5G2;COX5B;ATP5G1;COX5A;ATP5D;UCP2;COX11;NDUFV3;NDUFV2;NDUFV1;COX8A;NDUFA8;SURF1;NDUFA6;NDUFA5;NDUFA3;NDUFA2;SDHD;ATP5F1;COX6B1;NDUFS7;UQCRQ;NDUFS4;NDUFAB1;UQCRC1;NDUFS2							Base Excision Repair WP4752	14/31	0.000425132	0.00571171	3.78035	29.3473	MBD4;FEN1;PCNA;MPG;LIG3;HMGB1;UNG;POLE4;SMUG1;NEIL3;APEX1;POLE2;POLD2;POLE
	Radial Glia Cells	10/114	0.998133	0.999996	0.438554	0.000819437	MAPK10;GRIA2;GJA1;MAP1B;RCAN2;TRIM2;DPYSL3;SLIT2;PDZRN3;RUNX1T1							Glutathione metabolism WP164	2021-07-20	0.0526102	0.198206	2.46753	7.26651	GCLC;GPX1;GPX4;IDH1;GSS;GCLM;GGT1							Spliceosome	48/127	9.19887e-08	2.9522e-06	2.80528	45.4499	TCERG1;SF3B5;DDX5;RBM25;DDX46;SF3B6;EIF4A3;DDX23;SRSF1;SNRPD2;PUF60;PCBP1;MAGOH;SNRPD3;HNRNPA1;SF3B1;BCAS2;AQR;PPIL1;CCDC12;NCBP1;NCBP2;ALYREF;THOC1;CDC5L;PRPF40A;CWC15;LSM5;CRNKL1;LSM4;CDC40;U2SURP;LSM2;XAB2;LSM7;SNRNP40;HNRNPK;SNW1;PRPF18;SNRPG;PPIH;SNRPE;SRSF4;PRPF31;SRSF5;SNRPC;SRSF7;SNRPB							ATM Signaling Network in Development and Disease WP3878	18/45	0.000426395	0.00571171	3.06185	23.7604	PRKAA1;RIF1;PRKDC;H2AFX;RNF8;SMC1A;AURKB;RNF40;PPP5C;RAD50;TRIM28;CHEK1;CDK1;ATM;TP53BP1;NBN;CEP63;ATR
	Delta Cells	12/131	0.998421	0.999996	0.459763	0.000726392	PCSK2;MAPK10;GRIA2;UNC5B;RCAN2;TRIM2;RESP18;RBP1;UCP2;ETV1;ATP1B1;LCORL							Toll Like Receptor signaling WP88	1933-10-01	0.0583214	0.214729	1.99288	5.66333	IKBKB;RALBP1;TBK1;CHUK;CASP3;ABI1;TAB2;FADD;IRAK4;NR2C2							Licensing factor removal from origins	29/61	1.08616e-07	3.4066e-06	4.17379	66.9287	PSMD10;PSMD12;PSMD11;MCM7;PSMD14;GMNN;MCM10;PSMB10;PSMD8;PSMB6;PSMD9;ORC4;PSMB7;PSMD6;PTTG1;ORC3;PSMD1;CDT1;AZIN1;PSMA3;PSMA4;PSMC6;PSMA1;PSMC1;PSMC2;PSME1;MCM4;MCM5;MCM2							G1 to S cell cycle control WP45	23/64	0.000462666	0.00605671	2.57784	19.794	CDKN1A;PCNA;MCM7;CCNH;CDC25A;CREB3;ORC4;CCND3;CDK7;CREB1;CDK6;CDK4;ORC3;POLE2;ORC2;E2F1;CDK1;MCM4;MCM5;ATM;MNAT1;POLE;MCM2
	Mesangial Cells	14/148	0.998699	0.999996	0.476175	0.000620067	YAP1;SERPINE2;ROCK1;TPM2;DYRK1A;CRIM1;SMARCA5;PAWR;MIB1;AKAP12;GJA1;CALD1;MRC1;FLNA							Wnt Signaling Pathway NetPath WP539	26/108	0.0651919	0.234691	1.45462	3.97172	GSK3B;CAMK2D;CTBP2;CUL1;ARRB1;NLK;LRP6;PPP2CA;MAPK9;FRAT2;SUMO1;AKT1;MAP3K7;MAPK3;SMAD4;CSNK1A1;SENP2;RUNX2;DLG1;DAAM1;APC;MAP1B;CDK1;PIN1;TCF4;TAX1BP3							Transport of mature transcript to cytoplasm	27/55	1.28871e-07	3.95204e-06	4.43967	70.4329	NUP205;NUP107;NUP188;SRSF1;AAAS;NUP85;MAGOH;NUP43;EIF4E;RAE1;SRSF11;RANBP2;NCBP1;NUP155;NCBP2;ALYREF;CPSF3;CPSF2;NUP153;CDC40;NUP93;NUP35;NUP54;SRSF4;RNPS1;SRSF5;SRSF7							Melanoma WP4685	24/68	0.000477606	0.0061087	2.50676	19.1685	CDKN1A;BAD;ARAF;BRAF;PIK3CB;PIK3R1;NRAS;CREB1;CDK6;PIK3CA;CDK4;AKT2;KIT;E2F1;AKT1;BAX;KRAS;POLK;BAK1;SOS1;CALM1;SOS2;LAMTOR3;MAPK3
	Motor Neurons	9/111	0.999	0.999996	0.402375	0.000402647	ENAH;RBFOX2;PCGF2;CKB;MID1;RCOR2;TEAD1;BCAR1;PFN2							Homologous recombination WP1258	2021-05-13	0.0670241	0.236041	2.86338	7.73885	RAD50;RAD51;POLD2;ATM;NBN							Ubiquitin-mediated proteolysis	50/136	1.38639e-07	4.15918e-06	2.68468	42.3948	UBE3C;KEAP1;UBE2D1;UBE3A;BRCA1;HERC4;CDC23;HERC1;UBE2Q2;CDC27;SKP2;UBE2E2;UBE4A;UBE4B;MID1;PIAS2;PIAS1;BIRC6;ANAPC1;ANAPC13;UBA6;CUL3;CUL1;XIAP;CBL;ANAPC10;ANAPC11;FZR1;UBR5;TCEB2;UBE2F;UBE2H;UBE2I;MAP3K1;UBE2C;WWP1;CUL4A;KLHL9;UBE2W;ITCH;UBE2S;UBA3;UBA2;ERCC8;UBA1;STUB1;TRIM37;TRIP12;UBE2K;CUL4B							MECP2 and Associated Rett Syndrome WP3584	25/72	0.000487848	0.0061087	2.44478	18.6427	ARHGEF26;CNP;DHX9;DLX6;PSIP1;UBE3A;CTCF;YBX1;SMC3;FGF2;FUT8;SIN3A;E2F1;AKT1;GAMT;TET2;REST;CREB1;NCOR1;HNRNPH1;HNRNPF;SP3;TARDBP;TAF1;EZH2
	Mesothelial Cells	13/144	0.999141	0.999996	0.452245	0.000388452	YAP1;DUSP5;IGFBP3;HSPB8;KIAA1217;FRAS1;S100A16;ACKR3;ME2;FLNC;ST3GAL1;DOCK1;SH3D19							Dysregulated miRNA Targeting in Insulin/PI3K-AKT Signaling WP3855	2021-08-26	0.0793308	0.265435	2.03664	5.16112	BAD;EXOC7;RHEB;FLOT2;PIK3R1;SOS1;CRKL;MAPK3							APC/C-mediated degradation of cell cycle proteins	35/82	1.60298e-07	4.70661e-06	3.43233	53.703	PSMD10;PSMD12;PSMD11;PSMD14;CUL1;UBE2D1;ANAPC10;AURKB;PSMB10;ANAPC11;PSMD8;PSMB6;PSMD9;PSMB7;PSMD6;FZR1;CDC23;PTTG1;CDC27;PSMD1;SKP2;RPS27A;UBE2C;CCNA2;PSMA3;PSMA4;PSMC6;PSMA1;PSMC1;PSME4;PSMC2;PSME1;CDK1;UBA52;ANAPC1							Mitochondrial CIV Assembly WP4922	15/35	0.00053274	0.0065289	3.44315	25.9527	COX8A;COA3;COX7B;SURF1;PET100;COX4I1;COX7A2;COX6A1;COX5B;COX5A;COX6B1;COX11;COX14;COX10;COX20
	Osteoclasts	13/144	0.999141	0.999996	0.452245	0.000388452	ABCA1;ITGB1;SMAD4;ITGB5;F13A1;TNFRSF11B;HIF1A;CST3;CA2;MRC1;SPP1;RIN2;CTSD							Novel Jun-Dmp1 Pathway WP3654	2021-08-26	0.0793308	0.265435	2.03664	5.16112	NRAS;CDK4;ARAF;E2F1;BRAF;KRAS;JUNB;MAPK3							EGF/EGFR signaling pathway	51/141	1.89682e-07	5.45336e-06	2.61677	40.5021	ATF1;ERRFI1;NDUFA13;PEBP1;AP2A1;CRKL;ELK4;GJA1;RPS6KA1;AKT1;MYBL2;AP2M1;MAP3K4;JAK1;NCK1;VAV3;PRKCI;RALBP1;EPS15L1;CREB1;RASA1;SOS1;STAM2;CRK;SOS2;PCNA;IQGAP1;PIK3R1;CDC42;MAPK9;ATXN2;RAP1A;ERBB2;AP2S1;E2F1;CSK;EPS15;MAP3K2;MAP3K1;STAT1;STAT3;BRAF;PTPN11;PTPN12;PTK2;ITCH;RPS6KB1;ABI1;KRAS;RAB5A;BCAR1							Hepatitis B infection WP4666	44/152	0.000560262	0.00672315	1.87555	14.0424	CDKN1A;DDX3X;PCNA;ARAF;PIK3R1;PIK3CB;IKBKB;MAPK9;NRAS;TBK1;AKT2;CASP3;AKT1;FADD;MAP2K7;MAP3K7;JAK1;MAPK3;SMAD2;SMAD4;CREBBP;MAP3K1;CHUK;STAT1;BAD;STAT3;NFATC3;BRAF;IRAK4;YWHAZ;TGFBR1;MAPK10;CREB3;MAVS;CREB1;PIK3CA;BAX;TAB2;KRAS;SOS1;SOS2;IFNAR1;ATF4;CREB5
	Trigeminal Neurons	13/144	0.999141	0.999996	0.452245	0.000388452	GRIA2;CA10;HSPB8;PRUNE2;DGKZ;ADD2;MAPK10;MAP1B;RUFY3;RUFY2;CPNE3;KIF1B;CCDC92							p53 signaling WP2902	17/67	0.0802858	0.265435	1.55891	3.93183	CDKN1A;IGFBP3;SERPINE1;CCND3;CDK6;RRM2B;ZMAT3;CDK4;CASP3;PERP;CHEK1;CCNG1;CDK1;BAX;ATM;MDM4;ATR							Integrated cancer pathway	20/35	2.26368e-07	6.37527e-06	6.13161	93.8204	BARD1;SMAD2;BLM;BAD;STAT1;BRCA1;CDC25A;MSH6;RAD50;MSH2;CDK4;CASP3;CHEK1;E2F1;CDK1;AKT1;BAX;ATM;JAK1;ATR							Pathways affected in adenoid cystic carcinoma WP3651	23/65	0.000595945	0.0070054	2.51631	18.6845	SETD2;CREBBP;PRKDC;CNTN6;KMT2C;ATRX;JMJD1C;ARID4B;BRCA1;SMC1A;MORF4L1;MYCN;NCOR1;PIK3CA;KAT6A;NSD1;CHEK1;ERBB2;TLK1;AKT1;ATM;BCOR;CMTR2
	Satellite Glial Cells	9/114	0.99932	0.999996	0.390806	0.000265938	SOX2;GRIA2;CA10;ALDH2;CHL1;OPALIN;SPP1;BAALC;CBLN4							Signal Transduction of S1P Receptor WP57	2021-07-22	0.0837928	0.271489	2.13827	5.30164	SPHK2;SPHK1;AKT2;GNAI3;AKT1;MAPK6;MAPK3							Non-coding RNA metabolism	25/50	2.38636e-07	6.58636e-06	4.60236	70.1783	NUP205;NUP107;NUP188;DDX20;PHAX;AAAS;SNRPD2;NUP85;TGS1;NUP43;SNRPD3;RAE1;RANBP2;NCBP1;NUP155;NCBP2;NUP153;WDR77;NUP93;GEMIN4;SNRPG;NUP35;NUP54;SNRPE;SNRPB							Interactome of polycomb repressive complex 2 (PRC2) WP2916	2021-09-16	0.000640809	0.00738212	5.89732	43.3617	SUZ12;SETX;BCLAF1;ELL;RBBP4;AEBP2;THRAP3;MTF2;EZH2
	Parathyroid Chief Cells	8/106	0.999349	0.999996	0.372252	0.000242418	APP;SLC7A8;WFS1;PCGF2;SPP1;GPC4;PDZRN3;BCAR1							Keap1-Nrf2 WP1245	2021-05-14	0.0893948	0.28279	2.54507	6.14556	GCLC;PIK3CA;KEAP1;GCLM;NFE2L2							Degradation of beta-catenin by the destruction complex	32/73	2.57339e-07	6.9633e-06	3.59565	54.5563	PSMD10;GSK3B;PSMD12;PSMD11;PSMD14;CUL1;PSMB10;PSMD8;PPP2CA;PSMB6;PSMD9;PSMB7;PSMD6;FZR1;FRAT2;PPP2R1B;PPP2R1A;PPP2R5E;PSMD1;RPS27A;CSNK1A1;PPP2R5C;PSMA3;PSMA4;PSMC6;PSMA1;APC;PSMC1;PSME4;PSMC2;PSME1;UBA52							Interferon type I signaling pathways WP585	20/54	0.000683327	0.00771757	2.70199	19.6935	IFNAR2;MAP3K1;PRMT1;STAT1;STAT3;PTPN11;PIK3R1;CBL;CRKL;PIAS1;CREB1;RAP1A;RPS6KB1;MLST8;EIF4EBP1;CRK;EIF4E;IRF9;JAK1;IFNAR1
	Ductal Cells	11/132	0.999453	0.999996	0.414317	0.000226832	GRB7;KRT18;S100A16;ATP8B1;EPCAM;PERP;ARHGEF16;TACSTD2;SPP1;TMEM61;GPRC5C							Wnt Signaling Pathway and Pluripotency WP723	23/97	0.0907721	0.28279	1.42539	3.42007	GSK3B;PRKCI;CREBBP;WNT5B;CTBP2;CTNND1;ZBTB33;PPP2R5C;NLK;POU5F1;LRP6;SOX2;PPP2CA;MAPK10;MAPK9;CCND3;PPP2R1B;APC;PPP2R1A;PPP2R5E;TCF4;MAP3K7;PAFAH1B1							CDC42 signaling events	31/70	2.98462e-07	7.92073e-06	3.66133	55.0101	GSK3B;ARPC1B;WASL;IQGAP1;PIK3R1;CBL;CDC42;MAPK9;CTNNA1;MAP2K7;PAK2;MAPK3;PAK4;ACTR3;ACTR2;MAP3K1;YES1;EXOC7;LIMK1;ARPC4;BRAF;CDC42BPA;ENAH;TIAM1;DLG1;DIAPH3;PIK3CA;APC;RPS6KB1;ARPC3;BCAR1							Gastric Cancer Network 1 WP2361	13/29	0.000742033	0.00808441	3.7289	26.8709	TOP2A;NUP107;UBE2C;LIN9;KIF15;CENPF;APC;MCM4;CEP192;MYBL2;ECT2;KIF20B;E2F7
	Epiblast Cells	8/109	0.999565	0.999996	0.361129	0.000157244	SOX2;MYCN;PHC1;FRAS1;EPCAM;RCOR2;TDGF1;POU5F1							Delta-Notch Signaling Pathway WP265	20/83	0.0958144	0.292867	1.45563	3.41396	PSENEN;APP;GSK3B;HDAC2;SMAD4;STAT3;CUL1;ADAM10;FURIN;PIK3R1;RBPJ;ADAM17;ITCH;NCOR1;SNW1;SIN3A;AKT1;CIR1;SKP2;MAPK3							Activation of mRNA upon binding of the cap-binding complex and eIFs, and subsequent binding to 43S	27/57	3.25357e-07	8.47157e-06	4.14319	61.8923	RPS15;RPS14;RPS16;RPS15A;RPS19;EIF4EBP1;RPS27A;RPS10;EIF4E;RPS9;RPS7;EIF1AX;RPS5;EIF2S2;RPS26;RPS25;RPS28;EIF5;RPS27;EIF3G;EIF3H;EIF3E;EIF3F;FAU;EIF3D;EIF3A;EIF3B							Proteasome Degradation WP183	22/62	0.000743878	0.00808441	2.52685	18.2025	PSMD10;PSMD12;PSMD11;RPN2;H2AFX;UBE2D1;UCHL3;PSMB10;PSMD8;PSMB6;PSMD9;PSMB7;PSMD6;PSMA3;PSMA4;PSMC6;PSMA1;PSMC1;PSMC2;PSME1;PSMD1;UBA1
	Principal Cells	11/136	0.999666	0.999996	0.40096	0.000133749	KIAA1217;GRB7;TBCK;KCNE1;EPCAM;ARHGEF16;ERBB2;TACSTD2;TMEM61;GPRC5C;PTGES							ErbB signaling pathway WP1261	1946-12-01	0.10849	0.323978	1.61756	3.59277	GSK3B;CDKN1A;BAD;ERBB2;ARAF;EIF4EBP1;MAP2K7;SOS1;CRK;PTK2;PAK4;NCK1							RNA polymerase I, RNA polymerase III, and mitochondrial transcription	38/95	3.66139e-07	9.35688e-06	3.07347	45.5496	GTF3C3;RRN3;GTF3C5;CCNH;EHMT2;TTF1;SNAPC5;HIST1H3A;TAF1C;SNAPC3;POLR2E;PTRF;MAPK3;POLR2L;ZNF143;SSB;BRF1;CBX3;H2AFX;HIST1H2AJ;MBD2;GTF2H1;TFB2M;POLRMT;GTF2H3;HIST2H2BE;CDK7;POLR3B;POLR3D;POLR1C;ERCC2;POLR1D;TFAM;POLR3G;POLR3H;MNAT1;POLR3K;HIST1H2BC							ATM Signaling Pathway WP2516	16/40	0.000878272	0.0091979	3.06069	21.5398	CDKN1A;H2AFX;BRCA1;SMC1A;CDC25A;MAPK9;RAD50;CREB1;RAD51;CHEK1;CDK1;TLK1;MDM4;ATM;TP53BP1;NBN
	Vascular Smooth Muscle Cells	7/103	0.999698	0.999996	0.332454	0.000100356	CNN1;GJA1;CALD1;FLNC;SLIT2;PRKG1;RUNX1T1							Focal Adhesion WP85	40/185	0.11305	0.323978	1.26565	2.75903	ITGB1;GSK3B;ITGAM;ITGB5;ROCK1;ROCK2;ARAF;ILK;PIK3R1;PIK3CB;LAMC1;ARHGAP5;ACTB;CRKL;CDC42;MAPK9;CCND3;RAP1A;AKT2;ERBB2;SPP1;AKT1;FLNA;CAPN1;MAPK6;PAK2;PAK4;VASP;PPP1R12A;BAD;BRAF;LAMB1;PTK2;RHOB;MYL6;PIK3CA;SOS1;DOCK1;CRK;BCAR1							Adaptive immune system	157/606	4.40049e-07	1.09993e-05	1.628	23.828	UBE3C;UBE2D1;KEAP1;UBE3A;PVR;PSMD8;PSMD9;NPEPPS;PSMD6;CDC23;PPP2R1B;PPP2R1A;AKT2;KIF5B;CDC27;AKT1;AP1S1;PSMD1;FBXO3;FBXO6;KIFAP3;SKP2;MAP3K7;B2M;RNF111;AP2M1;PDIA3;WSB1;AP1B1;UBE2E2;UBE4A;RNF41;DYNC1LI2;PSME4;PSME1;UBE2V2;TRIB3;UBA52;ANAPC1;PSMD10;ANAPC13;PSMD12;PSMD11;PSMD14;SAR1B;UBA6;CUL3;CUL1;ITPR2;UBR2;UBR1;PIK3R1;ANAPC10;ANAPC11;KLC3;RAP1A;LYN;VASP;RAP1GAP2;UBE2F;UBE2H;YES1;HSPA5;UBE2C;KLHL…							IL-5 signaling pathway WP127	16/40	0.000878272	0.0091979	3.06069	21.5398	LYN;GSK3B;SYK;STAT1;STAT3;PTPN11;PIK3R1;SPRED1;RPS6KB1;RPS6KA1;RPS6KB2;AKT1;KRAS;SOS1;JAK1;MAPK3
	Erythroid-like And Erythroid Precursor Cells	13/153	0.999702	0.999996	0.422938	0.000126125	UROS;HEXA;NCOA4;HTATSF1;PFAS;CCNA2;EDRF1;UROD;EPB41L2;HMBS;KIT;UCP2;CD55							MAPK Cascade WP251	2021-08-28	0.113992	0.323978	1.83276	3.98006	MAP3K2;MAPK10;NRAS;MAP3K1;ARAF;BRAF;KRAS;MAPK3							Purine metabolism	56/164	4.4635e-07	1.09993e-05	2.39517	35.0226	ADK;NUDT2;PFAS;ZNRD1;GUK1;PPAT;ENPP1;PDE8A;POLE;PGM1;ADSL;GPX1;PDE4D;ENTPD6;DCK;APRT;NT5C3A;NME6;RRM2B;CAT;POLR1C;POLR1D;POLR1E;PDE5A;GART;PRPS2;PRPS1;AK1;AK2;GMPS;NT5C;DGUOK;POLR2B;POLR2C;POLD2;POLR2D;POLR2E;POLR2G;POLR2I;ADSS;POLR2L;POLR2J3;RRM1;PNPT1;PAICS;POLE4;POLA1;POLR3B;IMPDH1;IMPDH2;POLE2;POLR3D;POLR3G;POLR3H;POLR3K;ITPA							Prion disease pathway WP3995	14/33	0.000917894	0.00944119	3.38201	23.6518	PDIA3;PRNP;HSPA5;STAT3;EBF1;CTCF;SMC3;PTK2;HSP90B1;CREB1;CASP3;RAD21;RFX5;MAPK3
	Trophoblast Cells	10/130	0.999748	0.999996	0.379707	9.55637e-05	KLF5;SMAGP;PERP;SERPINE1;MAFF;TACSTD2;SIRT1;S100A11;CD55;PTGES							Oxidative Stress WP412	2021-08-28	0.113992	0.323978	1.83276	3.98006	MAPK10;GCLC;GPX1;TXNRD1;CAT;MGST1;JUNB;TXN2							T cell receptor regulation of apoptosis	156/603	5.25234e-07	1.27162e-05	1.6246	23.4908	AHCYL1;SERPINE2;ITSN1;PDCD5;NUDT2;ENO1;F11R;RPL10A;BZW1;PYCARD;RPS14;FBL;CCND3;CHCHD2;TBK1;NAMPT;TRIM24;JUNB;RAB2A;NFKBIL1;AP1B1;ATP11B;UTP11L;RNF126;CLIP1;TMX3;SOAT1;PSME1;CD2BP2;TFAM;SNRPC;BLZF1;ATF4;IFNAR1;SNRPB;PTGES;TSTA3;PSMD12;NOP2;CUL1;PHB;STK4;HSP90B1;BCL2L12;PRDX2;PRDX4;BAG1;ATP5D;PGK1;TP53BP2;ECT2;BPTF;BARD1;HSPA9;PLK3;TRAP1;FDPS;CREBBP;RPL41;HSPA5;TFPI2;KLHL20;CDK7;AMACR;IL5;TDP2;CDK4…							DNA Mismatch Repair WP531	2021-11-23	0.00097692	0.00986201	4.20564	29.1497	POLE4;MSH6;RFC3;PCNA;RFC1;MSH2;RFC2;EXO1;POLE2;POLD2;POLE
	Anterior Pituitary Gland Cells	10/133	0.999829	0.999996	0.370378	6.33731e-05	PCSK2;MAPK10;GRIA2;ANGPT1;GMPPA;PDZRN3;PRKG1;JAM3;NKTR;RUNX1T1							Amino Acid metabolism WP662	22/95	0.117453	0.328057	1.38179	2.9594	PDHX;PDHA1;VARS;GSS;IDH1;MCCC1;PYCR1;SDHD;EPRS;MUT;GLS;HAL;CPS1;RARS;SUCLG1;ASL;ACADM;BCAT1;GCLM;DLD;HIBCH;OTC							Mitotic prometaphase	22/43	7.56095e-07	1.79898e-05	4.81864	67.9192	RANBP2;AHCTF1;ERCC6L;RCC2;SMC3;RANGAP1;SMC1A;REC8;SKA2;PPP1CC;CENPE;CENPF;CLIP1;STAG1;SGOL1;XPO1;RPS27;RAD21;MAPRE1;CLASP1;CLASP2;PAFAH1B1							Mevalonate arm of cholesterol biosynthesis pathway WP4190	2021-07-11	0.000993049	0.00986201	8.02389	55.483	FDPS;IDI1;MVK;GGPS1;PMVK;MVD;HMGCR
	Mast Cells	23/235	0.999835	0.999996	0.493338	8.11856e-05	ABCA1;CSRNP1;OSBPL8;HS3ST3A1;ATL2;ZDHHC13;RAB27B;CDC42BPA;HSPA13;MEIS2;HS2ST1;ENAH;SPRED1;NCEH1;ALDH2;MRC1;KIT;RAPGEF2;RIOK2;PCBD1;SLC29A1;RIN2;CD55							IL-9 Signaling Pathway WP10	2021-07-24	0.123512	0.339134	1.88648	3.94542	STAT1;STAT3;AKT1;PTPN11;PIK3R1;MAPK3;JAK1							RNA polymerase	17/29	1.13048e-06	2.64417e-05	6.51055	89.1482	POLR2J3;ZNRD1;POLR3B;POLR2B;POLR2C;POLR3D;POLR2D;POLR1C;POLR2E;POLR1D;POLR1E;POLR3G;POLR2G;POLR3H;POLR2I;POLR3K;POLR2L							Translation Factors WP107	19/52	0.00111543	0.0108896	2.64409	17.9759	EIF5B;EIF2B4;EIF1AX;EIF2AK3;EIF2S2;EIF5;EIF6;EEF1D;EIF4EBP1;EIF3G;EIF3H;ETF1;EIF3E;EIF3F;EIF4E;EIF3D;EIF4G3;EIF3A;EIF3B
	Cardiomyocytes	15/174	0.999837	0.999996	0.429429	6.9913e-05	IL11RA;RRAD;HSPB8;PDE4D;FAM189A2;ATP2A2;FGF2;ADIPOR2;MFN2;STRN;CKB;FLNC;ZFPM2;PDLIM5;PRKG1							Fatty Acid Beta Oxidation WP1269	1934-09-01	0.14171	0.382097	1.64944	3.22296	ACADVL;ECHS1;ACSS2;TPI1;GK;GPD2;ACADM;ACSL3;DLD							HIF-1 degradation in normoxia	35/88	1.22403e-06	2.81527e-05	3.04265	41.4206	PSMD10;SETD2;CAMK2D;PSMD12;PSMD11;PSMD14;SAT2;HIF1A;PSMB10;PSMD8;PSMB6;PSMD9;MAPK9;PSMB7;PSMD6;PSMD1;MAPK6;TRIM23;MAPK3;HSP90AA1;CREBBP;MAPK10;PSMA3;PSMA4;PSMC6;PSMA1;APEX1;PSMC1;PSME4;ID1;PSMC2;PSME1;PSMG4;PSMG1;LAMTOR5							Endoderm differentiation WP2853	40/141	0.00148305	0.0140938	1.82194	11.8675	APP;CTBP2;CTR9;RTF1;LAMC1;NLK;PHF6;CDC73;SOX2;ELK4;EPB41L5;BTAF1;CAND1;TRIM5;UBR5;ASCC3;BPTF;SMAD2;VAV3;WDHD1;DUSP5;SMAD4;STAT1;POU5F1;LRPPRC;PIAS1;MAD2L2;AEBP2;APC;RFX7;SP4;MTF2;RGS10;TCF4;CEBPZ;TAF5;NAA15;EZH2;BMPR1A;CUL4B
	Cholangiocytes	10/134	0.99985	0.999996	0.367368	5.52625e-05	GRB7;EPCAM;ARHGEF16;TACSTD2;SPP1;TMEM61;SLC4A2;GGT1;CD24;GPRC5C							Glucuronidation WP1241	2021-05-16	0.143876	0.382097	2.08207	4.03673	UGDH;UGP2;PGM3;PGM1;HK1							Interactions of HIV Vpr protein with host cellular proteins	22/44	1.2564e-06	2.84234e-05	4.59933	62.4923	RANBP2;RANBP1;NUP205;NPM1;NUP107;NUP188;NUP155;HMGA1;PSIP1;NUP153;AAAS;RANGAP1;NUP93;XPO1;NUP85;NUP35;BANF1;NUP43;NUP54;RAE1;KPNB1;KPNA1							Head and Neck Squamous Cell Carcinoma WP4674	24/73	0.00150216	0.0140938	2.25028	14.6288	CDKN1A;PRKAA1;SMAD4;CUL3;KEAP1;PIK3CB;PIK3R1;NRAS;CDK6;PIK3CA;CDK4;RHEB;AKT2;ERBB2;RPS6KB2;MLST8;EIF4EBP1;E2F1;FAT1;AKT1;KRAS;FADD;EIF4E;NFE2L2
	Myofibroblasts	6/100	0.999873	0.999996	0.290978	3.69536e-05	CNN1;GJA1;CALD1;TPM2;FLNC;PRKG1							EPO Receptor Signaling WP1249	2021-07-26	0.17109	0.447041	1.6877	2.97974	CISH;STAT1;RASA1;STAT3;AKT1;SOS1;MAPK3							Alzheimer's disease	56/169	1.33271e-06	2.94541e-05	2.28849	30.9594	APP;GSK3B;COX7B;COX4I1;NDUFA10;ATP2A2;ATP5G3;IDE;COX6A1;ATP5G2;ATP5G1;CASP3;CAPN1;COX8A;PSENEN;ADAM10;SDHD;ATP5F1;COX6B1;ADAM17;NDUFS7;NDUFS4;UQCRC1;NDUFS2;NDUFB8;NDUFB7;UQCRB;NDUFB5;ATP5A1;NDUFB3;NDUFB2;ITPR2;COX7A2;UQCR11;UQCR10;COX5B;COX5A;HSD17B10;ATP5D;CYC1;FADD;NDUFV3;NDUFV2;NDUFV1;MAPK3;NDUFA8;NDUFA6;NDUFA5;BAD;NDUFA3;NDUFA2;EIF2AK3;UQCRQ;GNAQ;NDUFAB1;CALM1							Sterol regulatory element-binding proteins (SREBP) signaling WP1982	23/69	0.00151704	0.0140938	2.29694	14.9094	IDI1;FDPS;PRKAA1;SEC23A;SEC24A;SAR1B;INSIG2;NR1H2;CYP51A1;HMGCR;MED15;SIRT1;CREB1;PIK3CA;RNF139;GPAM;SCD;AKT1;SCAP;MVD;SEC24D;KPNB1;FDFT1
	Leydig Cells	11/145	0.999892	0.999996	0.373823	4.03713e-05	KIAA1217;YAP1;GJA1;CALD1;IGFBP3;HSPB8;DHCR7;PDE8A;PDZRN3;SASH1;SH3D19							Heme Biosynthesis WP18	2021-03-09	0.208692	0.495433	2.2897	3.58772	UROD;UROS;HMBS							Transport of mature mRNAs derived from intronless transcripts	20/38	1.34464e-06	2.94541e-05	5.10874	69.0671	RANBP2;NUP205;NUP107;NUP188;NCBP1;NUP155;NCBP2;ALYREF;CPSF3;CPSF2;NUP153;AAAS;NUP93;XPO1;NUP85;NUP35;NUP43;NUP54;EIF4E;RAE1							Cholesterol metabolism (includes both Bloch and Kandutsch-Russell pathways) WP4718	17/46	0.00173345	0.0158487	2.69123	17.1099	ABCA1;IDI1;FDPS;MVK;GGPS1;ELOVL5;NR1H2;CYP51A1;HMGCR;ACSL3;SOAT1;SCD;PMVK;SC5D;MVD;DHCR7;FDFT1
	Distal Tubule Cells	10/137	0.999898	0.999996	0.358624	3.66775e-05	CLIP1;TFRC;WNK1;TSC22D2;PLEKHA5;TRPM7;ATP1B1;LPP;TRPM6;EXPH5							NLR Proteins WP1256	2021-03-09	0.208692	0.495433	2.2897	3.58772	IKBKB;CHUK;MAP3K7							Ubiquitin-mediated degradation of phosphorylated Cdc25A	28/64	1.4928e-06	3.21884e-05	3.58023	48.0282	PSMD10;PSMD12;PSMD11;PSMD14;CUL1;PSMB10;CKS1B;PSMD8;PSMB6;PSMD9;PSMB7;PSMD6;FZR1;CHEK1;PSMD1;RPS27A;CDC25A;AZIN1;PSMA3;PSMA4;PSMC6;PSMA1;PSMC1;PSME4;PSMC2;PSME1;ATM;UBA52							Thyroid stimulating hormone (TSH) signaling pathway WP2032	22/66	0.00190146	0.0171131	2.29658	14.3884	STAT1;PDE4D;STAT3;GNAI3;SCRIB;BRAF;PIK3R1;TTF1;GNA13;CCND3;CREB1;RAP1A;PIK3CA;RPS6KB1;CDK4;APEX1;GNAQ;RPS6KA1;E2F1;AKT1;JAK1;MAPK3
	Merkel Cells	7/111	0.999902	0.999996	0.306731	3.00916e-05	SOX2;KRT18;MDK;EPCAM;ID2;ARHGEF16;TTF1							miR-127 in mesendoderm differentiation WP3991	2021-03-09	0.208692	0.495433	2.2897	3.58772	ACVR1;SMAD2;SMAD4							Rev-mediated nuclear export of HIV-1 RNA	16/27	1.92515e-06	4.08725e-05	6.68317	87.9539	RANBP2;RANBP1;NUP205;NUP188;NUP155;NUP153;AAAS;RANGAP1;NUP93;XPO1;NUP85;NUP35;NUP43;RAE1;KPNB1;KPNA1							G13 Signaling Pathway WP524	15/39	0.00201318	0.0176284	2.86859	17.8084	ROCK1;ROCK2;LIMK1;IQGAP1;PIK3CB;WASL;CDC42;GNA13;PPP1CB;MAPK10;RPS6KB1;PIK3CA;CFL2;CALM1;MAP3K4
	Epithelial Cells	20/218	0.999908	0.999996	0.459333	4.22776e-05	GRB7;ST6GAL1;CKAP2L;TACSTD2;CKAP2;ITPR2;KIF23;BRCA1;KIF15;ANLN;OCLN;BAIAP2L1;KLF5;EPCAM;EXO1;KIF20B;CD24;GGT1;ECT2;RAI14							Oxidative Damage WP1496	1942-10-01	0.209088	0.495433	1.43159	2.24044	CDC42;MAPK10;CDKN1A;CR2;PCNA;MAP3K1;BAD;TDP2;CASP3;BAK1							Autodegradation of Cdh1 by Cdh1-APC/C	26/58	2.00358e-06	4.18931e-05	3.73887	49.0561	PSMD10;PSMD12;PSMD11;PSMD14;UBE2D1;ANAPC10;PSMB10;ANAPC11;PSMD8;PSMB6;PSMD9;PSMB7;PSMD6;FZR1;CDC23;CDC27;PSMD1;UBE2C;PSMA3;PSMA4;PSMC6;PSMA1;PSMC1;PSMC2;PSME1;ANAPC1							miRNAs involved in DNA damage response WP1545	2021-08-15	0.00205052	0.0176284	5.2406	32.4375	CDKN1A;CCND3;CREB1;CDK6;H2AFX;E2F1;ATM;CDC25A
	Schwann Cells	10/138	0.99991	0.999996	0.355801	3.20123e-05	GRIA2;NRN1;CNP;RCAN2;HSPB8;FAM189A2;ALDOC;NF2;LAMC1;PDZRN3							Primary Focal Segmental Glomerulosclerosis FSGS WP2573	16/72	0.209105	0.495433	1.30916	2.04874	ITGB1;CDKN1A;PCNA;CD151;ILK;MKI67;PTK2;CD2AP;LRP6;FAT1;AKT1;MYH9;UTRN;CDK5RAP2;NCK1;LIMS1							Signaling events mediated by hepatocyte growth factor receptor (c-Met)	32/79	2.16152e-06	4.44243e-05	3.13548	40.9014	WASL;PIK3R1;CBL;CRKL;CDC42;RAP1A;AKT2;MLST8;CTNNA1;EIF4EBP1;AKT1;EIF4E;EPS15;PAK2;NCK1;MAPK3;PAK4;PRKCI;MAP3K1;BAD;RANBP9;PTPN11;PTK2;PIK3CA;APC;SOS1;CRK;RIN2;RAB5A;KPNB1;BCAR1;PTPN2							Regulation of sister chromatid separation at the metaphase-anaphase transition WP4240	2021-08-15	0.00205052	0.0176284	5.2406	32.4375	CENPE;STAG1;PTTG1;ESPL1;RAD21;SMC1A;SMC3;ANAPC11
	Enteric Neurons	13/166	0.999937	0.999996	0.386693	2.44076e-05	VEZT;GRIA2;CA10;PLEKHA5;NMNAT2;MAPK10;PIK3CA;MAP1B;TRIM2;FLOT2;STXBP5;KIF1B;IGF2BP3							Eicosanoid Synthesis WP318	2021-05-18	0.209167	0.495433	1.76154	2.75614	PTGES2;PNPLA8;LTA4H;GGT1;PTGES							Eukaryotic transcription initiation	21/42	2.18902e-06	4.44243e-05	4.59832	59.9255	CCNH;TAF13;ILK;GTF2H1;GTF2H3;GTF2F2;CDK7;POLR3B;POLR2B;POLR2C;POLR3D;ERCC2;POLR2E;POLR1D;POLR1E;POLR2G;POLR3H;TAF5;POLR2I;MNAT1;POLR3K							Mechanoregulation and pathology of YAP/TAZ via Hippo and non-Hippo mechanisms WP4534	17/47	0.00226821	0.0189397	2.60136	15.8391	ITGB1;TEAD4;ITGB5;TAZ;ACTB;STK3;SAV1;MAPK10;MAPK9;CTNNA1;NF2;MAP4K5;TEAD1;PAK2;MAP4K3;TEAD2;PAK4
	Sebocytes	8/124	0.999943	0.999996	0.314142	1.79302e-05	TBC1D2;KLF5;CNR2;EXO1;TACSTD2;LTA4H;F11R;S100A11							One carbon metabolism and related pathways WP1770	1952-12-01	0.211018	0.495433	1.37443	2.13835	GCLC;AHCYL1;GPX1;PCYT1A;GPX4;GSS;PEMT;MTR;CEPT1;BCAT1;GCLM;BCAT2							Mitochondrial protein import	24/52	2.60792e-06	5.21584e-05	3.94305	50.6956	HSPA9;TIMM8B;TOMM40;MTX1;ATP5A1;TIMM13;TIMM44;HSCB;TIMM10;TAZ;BCS1L;ATP5G1;GFER;TOMM22;HSPD1;TIMM10B;SAMM50;TOMM70A;GRPEL2;TOMM7;TIMM17B;PMPCA;CYC1;SLC25A13							Brain-derived neurotrophic factor (BDNF) signaling pathway WP2380	40/144	0.00226882	0.0189397	1.76906	10.7709	GRIA2;GSK3B;PRKAA1;PIK3R1;YBX1;IKBKB;CDC42;PPP2CA;MAPK9;RAP1A;DPYSL2;CASP3;RPS6KA1;EIF4EBP1;SPP1;AKT1;EIF4E;NCK1;MAPK3;MEF2A;VAV3;MAP3K2;MAP3K1;CHUK;STAT1;KIDINS220;SORT1;BAD;STAT3;RHOG;RANBP9;PTPN11;EIF2S2;MAPK10;TIAM1;ADAM17;DLG1;CREB1;RPS6KB1;APC
	Hematopoietic Stem Cells	14/178	0.999959	0.999996	0.388352	1.58848e-05	PRNP;ANGPT1;MGST1;TET2;F13A1;PBX2;ELF1;MYCN;APC;MAFF;MRC1;KIT;MYADM;BAALC							Folic Acid Network WP1273	2021-06-23	0.219236	0.500229	1.61653	2.45326	GPX1;GPX4;TXNRD1;CAT;MTR;PTGES							Downstream signaling events Of B cell receptor (BCR)	37/98	2.71024e-06	5.34304e-05	2.79488	35.8261	PSMD10;GSK3B;PSMD12;CDKN1A;PSMD11;PSMD14;CUL1;MALT1;PSMB10;PSMD8;IKBKB;PSMB6;PSMD9;PSMB7;PSMD6;NRAS;AKT2;MLST8;AKT1;PSMD1;RPS27A;MAP3K7;CHUK;BAD;PSMA3;CREB1;PSMA4;PSMC6;PSMA1;PSMC1;PSME4;PSMC2;RPS6KB2;PSME1;TRIB3;KRAS;UBA52							Glycogen Synthesis and Degradation WP500	15/40	0.00269412	0.0213164	2.75368	16.2927	PYGB;GSK3B;AGL;PHKB;PPP2R5C;PHKA2;HK1;PPP2CA;GYS1;UGP2;PPP2R1B;PPP2R1A;PPP2R5E;CALM1;PGM1
	Oligodendrocytes	14/178	0.999959	0.999996	0.388352	1.58848e-05	GAMT;GRIA2;CA10;OPALIN;PLLP;ITPR2;KLHL2;ANLN;TSPAN15;DBNDD2;DPY19L1;KIF1B;PDE8A;CREB5							Triacylglyceride Synthesis WP386	2021-06-23	0.219236	0.500229	1.61653	2.45326	AGPAT5;GNPAT;GK;GPAM;AGPS;AGPAT2							TGF-beta signaling pathway	59/185	2.86121e-06	5.56123e-05	2.16244	27.6019	ITGB1;ZFYVE9;SERPINE1;SUMO1;AKT1;JUNB;MAP3K7;RNF111;JAK1;MEF2A;PIAS2;RUNX2;TGFBR1;UCHL5;PIAS1;PPM1A;ZFYVE16;RBL1;STRAP;SOS1;YAP1;CUL1;XIAP;PIK3R1;NR2C2;CDC42;PPP2CA;MAPK9;SPP1;E2F4;MAP2K7;MAPK6;SKIL;PAK2;SPTBN1;MAPK3;SMAD2;TRAP1;CREBBP;SMAD4;UBE2I;STAT1;STAT3;SMAD9;WWP1;NUP153;SMAD5;PTK2;PPP1CA;MAPK10;OCLN;ITCH;SNW1;APC;RPS6KB1;CDK1;TAB2;DYNLRB1;BCAR1							PDGF Pathway WP2526	15/40	0.00269412	0.0213164	2.75368	16.2927	MAP3K1;CHUK;STAT1;SRF;STAT3;PTPN11;PIK3R1;WASL;CDC42;TIAM1;RASA1;ARFIP2;SOS1;JAK1;MAPK3
	Airway Smooth Muscle Cells	1999-05-01	0.999964	0.999996	0.242414	8.77721e-06	CNN1;CALD1;FOXF1;TPM2;FLNC							Kennedy pathway WP1771	2021-04-14	0.232831	0.516692	1.83183	2.66978	PTDSS2;PCYT1A;PEMT;CEPT1							PDGFB signaling pathway	45/129	3.02877e-06	5.80515e-05	2.47055	31.3941	NCKAP1;ARPC1B;SRF;BRK1;IQGAP1;PIK3R1;PIK3CB;WASL;CBL;MLLT4;PPP2CA;MAPK9;NRAS;RAP1A;PPP2R1A;CSK;MAP2K7;YWHAG;NCK1;MAPK3;LYN;ACTR3;ACTR2;YES1;STAT1;SPHK1;STAT3;ARPC4;BRAF;PTPN11;ARAP1;YWHAZ;DNM2;MAPK10;PIK3CA;ARPC3;RASA1;ABI1;PIN1;KRAS;SOS1;RAB5A;CRK;BCAR1;PTPN2							DNA damage response (only ATM dependent) WP710	32/110	0.00272331	0.0213164	1.88575	11.1371	GSK3B;CDKN1A;PIK3R1;PIK3CB;HMGB1;PIK3C2A;CDC42;MAPK9;CCND3;NRAS;SCP2;PPP2R5E;AKT2;ERBB2;AKT1;BAK1;MAP3K7;MAP3K4;SMAD4;MAP3K1;WNT5B;BAD;PPP2R5C;MAPK10;PIK3CA;APC;CAT;BAX;ATM;KRAS;SOS1;SOS2
	Pulmonary Vascular Smooth Muscle Cells	1999-05-01	0.999964	0.999996	0.242414	8.77721e-06	CPED1;CNN1;ANGPT1;CALD1;PRKG1							Osteoclast WP454	2021-04-14	0.232831	0.516692	1.83183	2.66978	ATP6V1G1;SPP1;TNFRSF11B;IFNAR1							ERBB1 downstream pathway	39/106	3.0988e-06	5.85801e-05	2.68267	34.0283	ATF1;NCKAP1;ARF4;ARPC1B;SRF;PEBP1;BRK1;IQGAP1;PIK3R1;PIK3CB;WASL;CDC42;PPP2CA;MAPK9;NRAS;PPP2R1A;MLST8;AKT1;YWHAG;MAPK3;ACTR3;MAP3K2;ACTR2;MAP3K1;BAD;STAT1;STAT3;ARPC4;BRAF;YWHAZ;PPP5C;DIAPH3;CREB1;PIK3CA;ARPC3;ABI1;KRAS;SOS1;RAB5A							Joubert Syndrome WP4656	24/76	0.00275916	0.0213164	2.12007	12.4932	NEK8;ARL3;CEP120;CCP110;ARL2;MYO5A;AHI1;PCM1;RAD50;NIN;ARL13B;KIAA0586;RHEB;CSPP1;TMEM216;FLNA;UNC119;ATM;BBS7;CEP41;PCNT;BBS5;PIBF1;ATF4
	Gastric Chief Cells	6/109	0.999965	0.999996	0.265407	9.36291e-06	PLEKHG3;ALDH2;ARHGEF16;ERBB2;SH3BGRL2;CD24							One Carbon Metabolism WP435	2021-07-29	0.254332	0.550288	1.45729	1.9952	AHCY;MTRR;MTHFD1L;EHMT2;MTR;MAT2B;GART							Cleavage of growing transcript in the termination region	21/43	3.55683e-06	6.63301e-05	4.38903	55.0676	NCBP1;NCBP2;CSTF3;ALYREF;CPSF3;CSTF2;SRSF1;CPSF2;CDC40;LSM10;PCF11;MAGOH;SNRPG;RNPS1;SNRPE;SRSF4;SNRPD3;SRSF5;SRSF7;SRSF11;SNRPB							Prolactin Signaling Pathway WP2037	24/76	0.00275916	0.0213164	2.12007	12.4932	ITGB1;GSK3B;CISH;STAT1;STAT3;PTPN11;PIK3CB;PIK3R1;CBL;YWHAZ;PTK2;MAPK9;PIK3CA;RPS6KB1;CASP3;ERBB2;EIF4EBP1;AKT1;FLNA;SOS1;CTSD;YWHAG;JAK1;MAPK3
	Peritubular Myoid Cells	7/120	0.999971	0.999996	0.282145	8.16752e-06	TMEM98;CALD1;TPM2;HSPB8;SAT2;INTS6;SH3D19							Ethanol metabolism resulting in production of ROS by CYP2E1 WP4265	2021-03-10	0.260739	0.550288	1.96248	2.63804	MAFF;MAFK;NFE2L2							Endosomal sorting complex required for transport (ESCRT) pathway	16/28	3.74286e-06	6.88686e-05	6.12586	76.5467	TSG101;VPS4B;VTA1;VPS4A;VPS37A;SNF8;VPS37B;CHMP2B;RPS27A;CHMP6;VPS36;CHMP7;STAM2;UBA52;VPS25;VPS28							DDX1 as a regulatory component of the Drosha microprocessor WP2942	2021-05-07	0.00281258	0.0213164	11.4577	67.2985	RAD50;DDX1;DROSHA;ATM;NBN
	Cajal-Retzius Cells	13/174	0.999974	0.999996	0.367298	9.38317e-06	GRIA2;GALNT13;NUDT2;TBCK;PREPL;MAP1B;KIF1B;CCM2;FAM171B;RAB11FIP2;TRIM44;SLC25A36;SLC25A46							Fatty acid oxidation WP2318	2021-03-10	0.260739	0.550288	1.96248	2.63804	ACADVL;ECHS1;ACADM							Pyrimidine metabolism	37/100	4.71634e-06	8.56389e-05	2.70582	33.1855	DTYMK;NUDT2;NT5C;ZNRD1;POLR2B;POLR2C;POLD2;POLR2D;POLR2E;POLR2G;TK1;UPP1;POLR2I;POLE;POLR2L;POLR2J3;RRM1;PNPT1;TXNRD1;ENTPD6;DCK;NT5C3A;POLE4;POLA1;NME6;RRM2B;POLR3B;POLE2;POLR3D;POLR1C;CMPK1;POLR1D;POLR1E;POLR3G;POLR3H;POLR3K;ITPA							Mevalonate pathway WP3963	2021-05-07	0.00281258	0.0213164	11.4577	67.2985	FDPS;MVK;PMVK;MVD;HMGCR
	Smooth Muscle Cells	12/169	0.999982	0.999996	0.34767	6.1897e-06	CNN1;SMTN;ANGPT1;RRAD;CALD1;AKT2;TPM2;ACKR3;NF2;ZBTB44;SEC24D;PRKG1							Alzheimers Disease WP2075	16/75	0.261557	0.550288	1.24237	1.66615	PSENEN;APP;GSK3B;BAD;EIF2AK3;ATP2A2;ADAM10;ITPR2;IDE;HSD17B10;ADAM17;CASP3;GNAQ;CAPN1;FADD;MAPK3							Apoptosis regulation	31/78	4.97195e-06	8.91076e-05	3.03664	37.0825	PSMD10;CDKN1A;PSMD12;PSMD11;PSMD14;MAGED1;PSMB10;PSMD8;PSMB6;PSMD9;PSMB7;PSMD6;CASP3;CHEK1;PSMD1;RPS27A;PAK2;APPL1;DCC;UNC5B;CDC25A;PSMA3;PSMA4;PSMC6;PSMA1;PSMC1;PSME4;PSMC2;PSME1;ATM;UBA52							Exercise-induced Circadian Regulation WP410	17/48	0.00293395	0.0219475	2.51729	14.6794	NCKAP1;IDI1;RBPMS;CBX3;NCOA4;ZFR;NR1D2;QKI;AZIN1;HERPUD1;PURA;UGP2;PSMA4;SUMO1;VAPA;KLF9;TAB2
	Pulmonary Alveolar Type II Cells	8/135	0.999985	0.999996	0.286739	4.27907e-06	NRN1;ABCD3;SOAT1;SCD;CTNND1;MRC1;TACSTD2;SAT1							BMP Signaling Pathway in Eyelid Development WP3663	2021-05-20	0.281921	0.578116	1.52648	1.93272	MAPK9;SMAD4;MAP3K1;SMAD5;MAPK3							Messenger RNA splicing: major pathway	28/68	6.30596e-06	0.000111567	3.22142	38.5733	SF3B5;DHX9;CSTF3;SF3B6;CSTF2;SRSF1;HNRNPR;YBX1;PCF11;PCBP1;MAGOH;HNRNPA1;SRSF11;ALYREF;CPSF3;CPSF2;SMC1A;CDC40;HNRNPK;HNRNPH1;HNRNPF;HNRNPA2B1;CD2BP2;HNRNPH2;SRSF4;RNPS1;SRSF5;SRSF7							Nucleotide metabolism WP404	2021-09-19	0.00308529	0.0227837	4.12737	23.8608	PRPS2;PRPS1;POLA1;RRM1;ADSL;RRM2B;IMPDH1;SAT1;ADSS
	Astrocytes	10/154	0.999986	0.999996	0.315957	4.38635e-06	GRIA2;GJA1;CA10;OPALIN;RCAN2;NFATC3;BAALC;ALDOC;TEAD1;SLC25A46							Hypertrophy Model WP202	2021-05-20	0.281921	0.578116	1.52648	1.93272	WDR1;IFRD1;EIF4EBP1;ADAM10;EIF4E							Purine ribonucleoside monophosphate biosynthesis	2021-09-11	7.35558e-06	0.00012849	20.6469	244.048	ADSL;IMPDH1;IMPDH2;PPAT;GMPS;ADSS;GART;PAICS;PFAS							Insulin Signaling WP481	43/160	0.003153	0.022989	1.69052	9.73636	GSK3B;PRKAA1;STXBP3;RRAD;SRF;PIK3R1;PIK3CB;PIK3C2A;CBL;IKBKB;GYS1;MAPK9;KIF5B;AKT2;RPS6KA1;EIF4EBP1;ENPP1;AKT1;FLOT2;MAP2K7;MAP4K5;MAPK6;MAP3K7;EIF4E;MAP3K4;MAP4K3;MAPK3;MAP3K2;PRKCI;MAP3K1;PTPN11;MAPK10;PFKL;PIK3CA;RPS6KB1;RHEB;RPS6KB2;TRIB3;SOS1;SOS2;CRK;PFKM;RHOQ
	Beta Cells	9/145	0.999986	0.999996	0.301152	4.15914e-06	PCSK2;EDARADD;MAPK10;GRIA2;CA10;PIR;SMAD9;STXBP5;MAFA							Glycolysis and Gluconeogenesis WP157	1951-11-01	0.299984	0.607468	1.25954	1.51652	PDHX;PDHA2;PFKL;TPI1;PDHA1;PGK1;ALDOC;ENO1;DLD;PFKM;HK1							N-glycan biosynthesis	22/48	7.80052e-06	0.000134559	3.89079	45.7608	B4GALT2;B4GALT3;ST6GAL1;RPN2;ALG6;ALG13;ALG3;ALG10;DDOST;DPM1;FUT8;DPM3;MAN1A2;MAN2A1;MGAT5B;DOLPP1;MGAT4B;MAN1C1;MGAT3;MGAT1;MGAT2;STT3B							Purine metabolism WP4792	2021-07-13	0.00369177	0.0265807	5.34861	29.961	PRPS1;DGUOK;ADSL;IMPDH1;ADSS;ITPA;APRT
	Glutaminergic Neurons	5/107	0.999987	0.999996	0.223292	2.87502e-06	GRIA2;CA10;TMEM132B;MEIS2;GLS							Microglia Pathogen Phagocytosis Pathway WP3626	1941-09-01	0.307982	0.609048	1.28807	1.51698	LYN;VAV3;ITGAM;SYK;PIK3CA;ARPC1B;PIK3CB;PIK3R1;PIK3C2A							Amino sugar and nucleotide sugar metabolism	21/45	8.8201e-06	0.000150268	4.02279	46.8192	GPI;TSTA3;CMAS;GALT;HEXB;UXS1;HEXA;MPI;GFPT1;HK1;GMPPB;UGDH;GALE;UGP2;FPGT;GMPPA;PGM3;GNPNAT1;NANS;PGM1;GALK1							NRF2-ARE regulation WP4357	2021-10-23	0.00397347	0.0282558	3.52801	19.5032	GSK3B;GCLC;YES1;PIK3CA;CUL3;KEAP1;PGAM5;SLC7A11;GCLM;NFE2L2
	Chondrocytes	9/146	0.999987	0.999996	0.298935	3.75121e-06	SEMA5A;GJA1;CALD1;STAT1;ATRX;TCF4;PDZRN3;RUNX2;ATF4							SREBF and miR33 in cholesterol and lipid homeostasis WP2084	2021-03-11	0.314136	0.609048	1.71707	1.98824	HMGCR;MED15;SIRT1							Cap-dependent translation initiation	29/73	1.00417e-05	0.000168994	3.03326	34.9091	RPL5;RPL30;RPLP1;RPLP0;RPL11;RPL10A;RPL9;RPL7A;RPL18A;RPL14;RPL35;RPL18;EIF4E;RPL19;EIF5B;RPL41;EIF1AX;EIF2S2;EIF5;EIF3G;EIF3H;RPL27;EIF3E;EIF3F;RPL29;UBA52;EIF3D;EIF3A;EIF3B							Parkin-Ubiquitin Proteasomal System pathway WP2359	22/70	0.00432491	0.0303798	2.10468	11.4565	PSMD10;HSPA9;PSMD12;PSMD11;PSMD14;TUBAL3;HSPA5;HSPA4;CUL1;CASK;HSPA14;TUBB4B;PSMD8;PSMD9;PSMD6;TUBB6;PSMC6;PSMC1;PSMC2;PSMD1;UBA1;STUB1
	Airway Goblet Cells	6/118	0.999988	0.999996	0.243945	2.87509e-06	KLF5;EPCAM;TACSTD2;TMEM61;GGH;QSOX1							Factors and pathways affecting insulin-like growth factor (IGF1)-Akt signaling WP3675	2021-07-31	0.315266	0.609048	1.33569	1.54183	ITGB1;SMAD2;RPS6KB1;IGFBP3;JKAMP;ILK;AKT1							HIV-1 transcription initiation	19/39	1.08139e-05	0.000179797	4.36622	49.9263	GTF2A1;CCNH;TAF13;TAF10;GTF2H1;GTF2H3;GTF2F2;CDK7;POLR2B;POLR2C;POLR2D;ERCC2;POLR2E;POLR2G;TAF5;POLR2I;MNAT1;POLR2L;TAF1							IL-2 signaling pathway WP49	15/42	0.00462681	0.032109	2.54939	13.7053	SYK;CISH;STAT1;STAT3;PTPN11;PIK3R1;NMI;CBL;CRKL;RPS6KB1;RPS6KB2;AKT1;SOS1;JAK1;MAPK3
	Loop Of Henle Cells	9/147	0.999989	0.999996	0.296751	3.39929e-06	SPSB1;ALDH2;CALD1;NEK6;HSPB8;TRPM7;RIN2;DOCK1;SASH1							Chemokine signaling pathway WP2292	37/190	0.316382	0.609048	1.10803	1.27513	GSK3B;ROCK1;ROCK2;GNAI3;ARRB1;PIK3R1;PIK3CB;WASL;CRKL;IKBKB;CDC42;GNG10;NRAS;RAP1A;AKT2;GRK6;AKT1;CSK;MAPK3;LYN;VAV3;CHUK;STAT1;STAT3;BRAF;PTK2;TIAM1;PIK3CA;GNB2;ELMO1;GNB4;KRAS;DOCK2;SOS1;SOS2;CRK;BCAR1							Transport to the Golgi and subsequent modification	18/36	1.16453e-05	0.000191316	4.59529	52.2053	B4GALT2;B4GALT3;SEC23A;ST6GAL1;SEC24A;SAR1B;MANEA;LMAN1;FUT8;MAN1A2;MAN2A1;MGAT4B;MAN1C1;MGAT3;MGAT1;PREB;MGAT2;SEC24D							Gastrin signaling pathway WP4659	32/114	0.00496386	0.0340379	1.79332	9.51459	ITGB1;GSK3B;CDKN1A;ROCK1;SERPINE1;ARRB1;PIK3R1;IKBKB;CDC42;MAPK9;CASP3;EIF4EBP1;AKT1;MAPK3;YES1;CHUK;BAD;STAT3;PTPN11;PTK2;RHOB;CREB1;PIK3CA;RPS6KB1;GNAQ;KIT;TCF4;KRAS;SOS1;CRK;LAMTOR3;BCAR1
	Neurons	26/289	0.999989	0.999996	0.448505	4.84045e-06	PCSK2;RERE;GRIA2;ZCCHC7;NRN1;KMT2C;PRUNE2;CHD6;GPATCH8;CCDC28B;CAMK2N1;CSPP1;RESP18;SACS;ZNF445;PNISR;CA10;SLC30A9;MYO5A;PTPN11;SCAMP1;VSNL1;AAK1;TRIP11;ZMYND11;KCNK1							Mitochondrial LC-Fatty Acid Beta-Oxidation WP401	2021-04-16	0.319562	0.609048	1.52634	1.74125	ACADVL;SCP2;ACSL3;ACADM							G2/M checkpoints	20/43	1.53118e-05	0.000248592	3.99693	44.3135	RFC3;MCM7;MCM8;RFC2;HUS1;MCM10;CDC25A;ORC4;DBF4;ORC3;CHEK1;ORC2;CDK1;MCM4;RAD17;ATM;MCM5;CLSPN;ATR;MCM2							Gastric Cancer Network 2 WP2363	2021-12-31	0.0052085	0.0352952	2.89724	15.2321	TOP2A;PLAC8;AHCTF1;RFC3;CHTF8;UBE2C;DSCC1;ATAD2;RAD17;CEBPZ;FAM91A1;MTDH
	Crypt Cells	5/110	0.999991	0.999996	0.216872	2.05224e-06	SLC12A2;TRIM2;SH3BGRL2;GPC4;PDZRN3							Splicing factor NOVA regulated synaptic proteins WP1983	1942-09-01	0.334953	0.630958	1.24896	1.36607	MAPK9;SNW1;CADM1;CHL1;EPB41L2;CASK;ATP2B1;STX2;CLASP1							G0 and early G1 pathway	14/25	2.10209e-05	0.000337312	5.8445	62.9452	TOP2A;LIN54;PCNA;LIN37;DYRK1A;LIN9;CDC25A;CCNA2;RBL1;RBBP4;E2F1;CDK1;MYBL2;E2F4							Pathogenic Escherichia coli infection WP2272	18/55	0.00587837	0.0393714	2.23296	11.4695	ITGB1;ROCK1;TUBAL3;ROCK2;ARPC1B;ARPC5L;ARPC4;WASL;TUBB4B;YWHAZ;ACTB;CDC42;TUBB6;OCLN;KRT18;ARPC3;ARHGEF2;NCK1
	Enteric Glia Cells	5/111	0.999991	0.999996	0.214813	1.85797e-06	CHL1;RCAN2;TRIM2;FAM189A2;INTS6							IL-1 Signaling Pathway WP37	1937-08-01	0.340747	0.634494	1.26328	1.36006	CHUK;AKT1;PTPN11;TAB2;CAPN1;IRAK4;MAP3K7;MAPK3							TGF-beta receptor activation of SMADs	15/28	2.17254e-05	0.000344611	5.29942	56.9	SMAD2;SMAD4;ZFYVE9;FURIN;TGFBR1;UCHL5;PPP1CA;PPP1CB;PPP1CC;XPO1;PMEPA1;STRAP;STUB1;RPS27A;UBA52							Oxidative phosphorylation WP623	19/60	0.00703311	0.0465641	2.12713	10.5445	NDUFA8;NDUFB8;NDUFB7;NDUFA6;NDUFA11;NDUFA5;NDUFB5;NDUFA3;NDUFA10;ATP6AP2;NDUFA2;NDUFB2;NDUFS7;NDUFS4;NDUFAB1;NDUFS2;NDUFV3;NDUFV2;NDUFV1
	Hepatocytes	17/221	0.999991	0.999996	0.378491	3.23951e-06	ABCD3;ACSS2;SAT2;MCC;RPP25L;RHOB;HAL;CPS1;NNT;SCD;UCP2;OCIAD1;ASL;ACADM;PHLDA1;SPTBN1;OTC							Fatty Acid Biosynthesis WP336	2021-05-22	0.358543	0.651041	1.34673	1.38135	MECR;ECHS1;ACSS2;ECHDC1;ACSL3							Immune system	229/998	2.29097e-05	0.000359266	1.38782	14.8274	ATF1;APP;NUP107;EIF4A3;KEAP1;CRKL;PSMD8;PSMD9;PSMD6;TBK1;CDC23;PPP2R1B;PPP2R1A;AKT2;CDC27;RPS6KA1;AKT1;PSMD1;FBXO3;AP1S1;FBXO6;KIFAP3;SKP2;B2M;RNF111;MEF2A;WSB1;AP1B1;NUP93;DYNC1LI2;RNF125;PSME4;PSME1;TRIB3;UBA52;ANAPC13;NUP205;SAR1B;PIK3R1;AAAS;ANAPC10;ANAPC11;NUP85;FADD;ATG5;LYN;VASP;CREBBP;YES1;CALM1;DZIP3;CDKN1A;CLTC;AP2A1;KIF11;ECSIT;KIF15;EEA1;IKBKB;ACTR1A;ACTR1B;MRC1;CTSF;CTSD;JAK1;DUSP3;S…							Ferroptosis WP4313	14/40	0.00750076	0.0490959	2.47041	12.0871	PRNP;TFRC;GPX4;GSS;NCOA4;SLC3A2;SAT2;SLC7A11;ACSL3;SAT1;GCLC;PCBP1;GCLM;ATG5
	Hepatic Stellate Cells	7/132	0.999992	0.999996	0.254871	2.10001e-06	GJA1;CALD1;FOXF1;IGFBP3;TPM2;RBP1;PDZRN3							Hedgehog Signaling Pathway WP116	2021-05-22	0.358543	0.651041	1.34673	1.38135	CREBBP;SIN3A;RAB23;DYRK1A;CDK1							Transcriptional activity of SMAD2/SMAD3-SMAD4 heterotrimer	19/41	2.65968e-05	0.0004124	3.9688	41.8102	SMAD2;SMAD4;CCNT2;TGIF2;USP9X;SERPINE1;UBE2D1;CCNC;CDK9;PPM1A;NCOR1;RBL1;E2F4;RPS27A;JUNB;SKIL;UBA52;RNF111;TRIM33							Glioblastoma signaling pathways WP2261	24/82	0.00799159	0.0514497	1.90006	9.17607	ERRFI1;CDKN1A;PRKCI;ARAF;BRAF;BRCA1;PIK3CB;PIK3R1;PIK3C2A;CBL;MSH6;NRAS;CDK6;PIK3CA;CDK4;AKT2;ERBB2;E2F1;AKT1;ATM;KRAS;MDM4;MAP2K7;MAPK3
	Purkinje Fiber Cells	4/102	0.999993	0.999996	0.185918	1.37265e-06	GRIA2;MAP1B;TMEM132B;RUNX1T1							Apoptosis Modulation by HSP70 WP166	2021-04-17	0.36393	0.651041	1.40884	1.42404	MAPK10;MAP3K1;CASP3;FADD							Chromosome maintenance	36/103	2.70323e-05	0.000414495	2.47421	26.025	FEN1;PCNA;CASC5;RSF1;BRCA1;SMC3;SYNE2;RBBP4;MIS18BP1;RUVBL2;RAD21;POLD2;POLE;CENPU;RFC3;NPM1;UBE2I;RFC1;RFC2;HIST1H2AJ;H2AFX;SMARCA5;SMC1A;TERF1;HIST2H2BE;REC8;POLA1;STAG1;POLE2;CENPK;NHP2;POT1;CENPQ;ITGB3BP;HIST1H2BC;ATR							Glycosylation and related congenital defects WP4521	2021-10-25	0.00803902	0.0514497	3.05723	14.7464	GMPPB;DPM1;DPM3;ALG6;MPI;ALG3;ALG13;MAGT1;MGAT2;MPDU1
	Myocytes	10/163	0.999993	0.999996	0.297207	2.12303e-06	MEF2A;SIX4;TPM2;HSPB8;MRC1;LAMB1;FLNC;DOCK1;PTK2;PRKG1							Pentose Phosphate Pathway WP63	2021-02-07	0.365708	0.651041	1.83136	1.8422	RPE;PGLS							Cyclin D-associated events in G1	18/38	2.98831e-05	0.000444213	4.13526	43.082	CDKN1A;CCNH;CUL1;CKS1B;PPP2CA;CCND3;CDK7;CDK6;RBL1;PPP2R1B;PPP2R1A;CDK4;E2F1;E2F4;RPS27A;SKP2;MNAT1;UBA52							Inhibition of exosome biogenesis and secretion by Manumycin A in CRPC cells WP4301	2021-08-18	0.00838911	0.0531003	3.66775	17.5348	NRAS;PDCD6IP;HNRNPH1;ARAF;BRAF;KRAS;RAB5A;MAPK3
	Osteoblasts	9/154	0.999993	0.999996	0.282304	1.97287e-06	GJA1;P2RX4;MAGED1;CALD1;IGFBP3;SPP1;NF2;HIF1A;RUNX2							Tryptophan metabolism WP79	1944-09-01	0.389874	0.686517	1.17745	1.10908	ALDH3A2;ECHS1;ALDH2;RNF25;PRMT1;UBR5;CAT;UBE3A;HSD17B10							Shigellosis	25/62	2.99003e-05	0.000444213	3.10743	32.372	ITGB1;ROCK1;ROCK2;ARPC1B;ARPC5L;WASL;ACTB;CRKL;IKBKB;CDC42;MAPK9;CSK;ATG5;MAPK3;CHUK;RIPK2;RHOG;ARPC4;MAD2L2;MAPK10;ARPC3;ELMO1;CRK;DOCK1;PFN2							Angiopoietin Like Protein 8 Regulatory Pathway WP3915	35/132	0.00897622	0.0561989	1.65801	7.81447	GSK3B;PRKAA1;PIK3R1;PIK3CB;PIK3C2A;CBL;GYS1;MAPK9;AKT2;RPS6KA1;EIF4EBP1;MLST8;AKT1;FLOT2;MAP2K7;MAP4K5;MAPK6;MAP3K7;EIF4E;MAP3K4;MAP4K3;MAPK3;MAP3K2;MAP3K1;EXOC7;MAPK10;PIK3CA;RPS6KB1;RHEB;SCD;RPS6KB2;SOS1;SOS2;CRK;RHOQ
	Juxtaglomerular Cells	4/103	0.999993	0.999996	0.184029	1.26036e-06	SEMA5A;CNN1;RBPMS;CALD1							Selenium Micronutrient Network WP1272	2021-05-23	0.397239	0.691965	1.27184	1.17418	GPX1;GPX4;CAT;MTR;PTGES							Insulin signaling pathway	77/277	3.02471e-05	0.000444213	1.77897	18.5121	PYGB;GSK3B;ARAF;PIK3CB;ARHGAP5;PIK3C2A;CRKL;HK1;IKBKB;PPP1CB;GYS1;PPP1CC;AKT2;KIF5B;RPS6KA1;AKT1;ENPP1;FLOT2;MAP3K7;MAP3K4;NCK1;PRKCI;CISH;EXOC7;RHOG;RHOF;RHOC;PHKA2;RHOB;CREB1;PIK3CA;PRKAR1A;EIF4E1B;RASA1;EXOC3;TRIB3;EXOC5;SOS1;CRK;SOS2;RHOQ;EXOC1;PRKAA1;STXBP3;ROCK1;RRAD;ROCK2;SRF;PIK3R1;CBL;MAPK9;NRAS;EIF4EBP1;INPP5K;MAP4K5;MAP2K7;MAPK6;EIF4E;MAP4K3;SOCS4;MAPK3;MAP3K2;EIF2B4;MAP3K1;BAD;BRAF;PH…							Apoptosis-related network due to altered Notch3 in ovarian cancer WP2864	17/53	0.00911828	0.0564745	2.16701	10.1795	VAV3;APP;HELLS;CDKN1A;HSPA5;RIPK2;CUL1;PTK2;HSPD1;NET1;GCLC;RPS6KB1;SERBP1;CTNNA1;AKT1;PAK2;TNFRSF21
	Plasma Cells	10/166	0.999994	0.999996	0.291437	1.82143e-06	CD53;SSR4;SPAG4;ENPP1;HTRA2;CD9;PRDM1;CD24;MANEA;PIAS1							Myometrial Relaxation and Contraction Pathways WP385	29/153	0.402534	0.693728	1.07106	0.974639	ATF1;CAMK2D;ITPR2;ATP2A2;ARRB1;ACTB;CNN1;GJA1;CALD1;GRK6;YWHAG;GABPA;CDK5RAP2;GSTO1;IGFBP3;PDE4D;DGKZ;YWHAZ;CREB3;CREB1;PRKAR1A;GNB2;GNAQ;MAFF;GNB4;RGS10;ACKR3;PKIG;ATF4							Androgen receptor signaling, proteolysis, and transcription regulation	32/88	3.0258e-05	0.000444213	2.63011	27.3683	GSK3B;CDKN1A;ROCK1;ROCK2;UBE3A;RNF6;BRCA1;PIK3R1;NR2C2;RNF4;CDC42;SUMO1;BAG1;AKT1;FLNA;PATZ1;NCOA1;CREBBP;SMAD4;UBE2I;NCOA3;NCOA4;STAT3;DSTN;SIRT1;RUNX2;PTK2;PIAS1;RHOB;CREB1;NCOR1;STUB1							MAPK Cascade WP422	1933-12-01	0.00923125	0.0565659	2.62099	12.2798	MAP3K2;MAPK10;NRAS;MAP3K1;ARAF;BRAF;KRAS;MAP2K7;SOS1;LAMTOR3;SOS2;MAPK3
	Germ Cells	16/222	0.999994	0.999996	0.352626	2.13536e-06	PDHA2;ATL3;ACTL7B;PARN;MRPL14;BRCA1;MKI67;POU5F1;FAM71E1;MLH3;DAZL;CCDC91;CHEK1;BCL2L14;MDN1;CREB5							Selenium metabolism/Selenoproteins WP108	1950-10-01	0.40703	0.694094	1.14471	1.02895	EEFSEC;RPL30;GPX1;GPX4;SECISBP2;TXNRD1;SP3;TRNAU1AP;SEPHS1;NFE2L2							Antiviral mechanism by interferon-stimulated genes	27/70	3.74665e-05	0.000533029	2.8883	29.4378	NUP205;NUP107;NUP188;EIF4A3;AAAS;NUP85;KPNA4;NUP43;RPS27A;KPNA3;EIF4E;RAE1;JAK1;KPNA1;MAPK3;RANBP2;NUP155;STAT1;NUP153;NUP93;PPM1B;NUP35;PIN1;NUP54;UBA52;EIF4G3;KPNB1							IL-4 signaling pathway WP395	17/54	0.011133	0.0675014	2.10831	9.48285	CHUK;STAT1;BAD;STAT3;PTPN11;PIK3R1;CBL;IKBKB;PIK3CA;NFIL3;RPS6KB1;AKT1;FLNA;SOS1;JAK1;MAPK3;SOCS5
	Platelets	15/214	0.999994	0.999996	0.342267	2.02921e-06	ABCC4;ITGAM;GPX1;ANGPT1;SERPINE1;NCOA4;F13A1;ADAM10;ILK;F11R;ALDH2;CA2;SH3BGRL2;ACKR3;CD9							Notch Signaling Pathway WP29	1946-09-01	0.445147	0.751185	1.11367	0.901349	HDAC2;CREBBP;ADAM17;SNW1;CTBP2;DTX2;CIR1;RFNG;RBPJ							Nucleotide metabolism	27/70	3.74665e-05	0.000533029	2.8883	29.4378	DTYMK;AK1;ADK;AK2;GMPS;PFAS;NT5C;DGUOK;GUK1;PPAT;TK1;UPP1;ADSS;ADSL;RRM1;GPX1;TXNRD1;DCK;PAICS;APRT;NT5C3A;RRM2B;IMPDH1;IMPDH2;CAT;CMPK1;GART							Computational Model of Aerobic Glycolysis WP4629	2021-06-12	0.0113788	0.0682731	4.58324	20.5146	GPI;TPI1;PGK1;ENO1;PFKM;HK1
	Fibroblasts	17/232	0.999994	0.999996	0.358882	2.12619e-06	NFAT5;FOXF1;IGFBP3;STAT3;LAMB1;LAMC1;ARAP1;HIF1A;FGF2;MDK;ERCC1;UCP2;KLF9;ITGBL1;ACKR3;TCF4;CD55							Apoptosis WP1254	15/81	0.490297	0.818847	1.04045	0.741576	HELLS;MAP3K1;CHUK;SCAF11;BAD;XIAP;PIK3R1;IKBKB;MAPK10;CASP3;AKT1;BAX;FADD;BAK1;TNFRSF21							Pancreatic cancer	27/70	3.74665e-05	0.000533029	2.8883	29.4378	ARAF;PIK3CB;PIK3R1;IKBKB;CDC42;MAPK9;AKT2;ERBB2;E2F1;AKT1;JAK1;MAPK3;SMAD2;RALBP1;SMAD4;CHUK;BAD;STAT1;STAT3;BRAF;TGFBR1;MAPK10;CDK6;RAD51;PIK3CA;CDK4;KRAS							Glycerophospholipid Biosynthetic Pathway WP2533	2021-11-30	0.0116485	0.0691702	2.65506	11.8219	GNPAT;GK;PIK3CA;GPAM;PTPMT1;IPMK;AGPS;PEMT;PIK3CB;CEPT1;LPIN2
	Interneurons	25/305	0.999994	0.999996	0.404531	2.35134e-06	PCSK2;GRIA2;LPGAT1;NRN1;ILDR2;SPTY2D1;ARHGAP21;PCF11;SURF1;CA10;ACBD5;SLC16A1;PIANP;CASK;ETV1;SCAMP1;ZDHHC17;OXR1;PDP1;RAB15;ELMO1;AAK1;RGS10;PTPN4;FRYL							Alanine and aspartate metabolism WP240	2021-03-15	0.520624	0.856195	1.14443	0.747003	DARS;ADSL;ASL							Signaling by SCF-KIT	29/78	4.37862e-05	0.000616582	2.72291	27.3277	GSK3B;GRB7;CDKN1A;PIK3R1;CBL;NRAS;AKT2;CHEK1;MLST8;AKT1;SOCS6;SH2B3;MAPK3;LYN;YES1;CHUK;BAD;STAT1;STAT3;PTPN11;FER;CREB1;PIK3CA;KIT;RPS6KB2;CDK1;TRIB3;KRAS;SOS1							Translation inhibitors in chronically activated PDGFRA cells WP4566	15/46	0.0118005	0.0693578	2.2199	9.8555	PIK3R1;PIK3CB;MAPK10;MAPK9;RPS6KB1;PIK3CA;AKT2;RPS6KA1;RPS6KB2;EIF4EBP1;AKT1;MAP2K7;EIF4E;EIF4G3;MAPK3
	Gamma (PP) Cells	6/128	0.999994	0.999996	0.223812	1.2902e-06	MAPK10;GRIA2;RCAN2;TRIM2;ETV1;ATP1B1							Eicosanoid metabolism via Lipo Oxygenases (LOX) WP4348	1932-06-01	0.523622	0.856195	1.05638	0.683464	TRPA1;LTA4H;ACOX3;GGT1;PTGR1;PTGR2							G1 to S cell cycle control	26/67	4.59009e-05	0.00063983	2.91654	29.1334	CDKN1A;PCNA;MCM7;CCNH;ORC4;CCND3;ORC3;ORC2;E2F1;E2F4;POLE;E2F6;CDC25A;CREB3;CDK7;CREB1;RBL1;CDK6;CDK4;POLE2;CDK1;MCM4;MCM5;ATM;MNAT1;MCM2							Signaling of Hepatocyte Growth Factor Receptor WP313	1934-12-01	0.0119845	0.0697282	2.5017	11.0679	ITGB1;RAP1A;PIK3CA;RASA1;STAT3;PTPN11;SOS1;CRK;DOCK1;PTK2;CRKL;MAPK3
	Oxyphil Cells	1994-03-01	0.999994	0.999996	0.150187	8.53588e-07	XPNPEP3;PTGR2;PIAS2							Focal Adhesion-PI3K-Akt-mTOR-signaling pathway WP2841	58/324	0.528515	0.856195	0.998014	0.636417	ITGB1;GSK3B;CDKN1A;ITGAM;ITGB5;PIK3CB;LAMC1;PIK3C2A;FGF2;IKBKB;GYS1;PPP2R1B;PPP2R1A;PPP2R5E;AKT2;MLST8;AKT1;JAK1;RAB2A;IFNAR2;HSP90AA1;STRADA;PPP2R5C;CREB3;CREB1;PIK3CA;EIF4E1B;KIT;SOS1;EPHA2;ATF4;IFNAR1;CREB5;PRKAA1;CAB39;PIK3R1;HIF1A;HSP90B1;PPP2CA;GNG10;NRAS;SPP1;EIF4EBP1;EIF4E;MAPK3;ANGPT1;BAD;LAMB1;PTK2;RAB11B;RAB10;RPS6KB1;RAB14;RHEB;GNB2;RPS6KB2;GNB4;KRAS							Bacterial invasion of epithelial cells	27/71	5.02106e-05	0.000692906	2.82249	27.9406	ITGB1;ARHGEF26;ARPC1B;CLTC;ARPC5L;CLTB;ILK;PIK3CB;WASL;PIK3R1;CBL;ACTB;CRKL;CDC42;CTNNA1;RHOG;ARPC4;PTK2;CD2AP;DNM2;MAD2L2;PIK3CA;ARPC3;ELMO1;CRK;DOCK1;BCAR1							Circadian rhythm related genes WP3594	49/201	0.0128103	0.0735795	1.48215	6.45846	TOP2A;SUV39H2;GSK3B;SERPINE1;UBE3A;CCAR2;PPP1CB;PPP1CC;SIN3A;NAMPT;METTL3;DYRK1A;SIRT1;NCOR1;CREB1;THRAP3;TOP1;UBA52;ATF4;DDX5;PRKAA1;HDAC2;AHCY;HDAC3;KMT2A;MAGED1;DHX9;PRKDC;ROCK2;CUL1;CST3;MAPK9;NFIL3;DRD1;RPS27A;ZFHX3;HOMER1;GFPT1;NR1D2;PPP1CA;SETX;MAPK10;MYBBP1A;CDK4;ID2;GNAQ;KLF9;FBXL3;EZH2
	Olfactory Epithelial Cells	16/226	0.999994	0.999996	0.345824	1.95147e-06	SH3GLB2;LRRC45;LMAN2L;ARL3;AK1;FAM229B;MANEA;WDR54;CCDC28B;KLHL5;IMPDH1;TRIM2;CWC22;STOM;CKB;PFN2							ESC Pluripotency Pathways WP339	21/118	0.552924	0.886868	0.990897	0.587141	ACVR1;GSK3B;ACTR2;SMAD4;WNT5B;STAT3;ARAF;SMAD9;BRAF;PTPN11;FGF2;SMAD5;LRP6;APC;AKT2;AKT1;IL6ST;SOS1;MAPK6;BMPR1A;JAK1							Activation of NF-kappaB in B cells	26/68	6.17391e-05	0.000843564	2.84692	27.5941	PSMD10;PSMD12;PSMD11;PSMD14;CUL1;MALT1;PSMB10;IKBKB;PSMD8;PSMB6;PSMD9;PSMB7;PSMD6;PSMD1;RPS27A;MAP3K7;CHUK;PSMA3;PSMA4;PSMC6;PSMA1;PSMC1;PSME4;PSMC2;PSME1;UBA52							Kit receptor signaling pathway WP304	18/59	0.012902	0.0735795	2.01462	8.76433	LYN;GRB7;STAT1;BAD;STAT3;PTPN11;PIK3R1;CBL;CRKL;RPS6KB1;RPS6KA1;KIT;AKT1;SOS1;SOCS6;JUNB;CRK;MAPK3
	Enterocytes	13/203	0.999995	0.999996	0.310681	1.63528e-06	PDHA1;PRAP1;GLS;ABHD11;KLF5;CPS1;PLIN3;FLOT2;PMEPA1;PLIN2;TRPM6;CD55;OTC							Leptin and adiponectin WP683	2021-02-10	0.558565	0.887133	1.14439	0.666475	PRKAA1;ADIPOR2							Parkinson's disease	42/131	6.34727e-05	0.000858749	2.1738	21.0095	COX7B;NDUFB8;NDUFB7;UQCRB;NDUFB5;COX4I1;NDUFA10;ATP5A1;NDUFB3;NDUFB2;HTRA2;COX7A2;UQCR11;ATP5G3;UQCR10;COX6A1;ATP5G2;COX5B;ATP5G1;COX5A;CASP3;ATP5D;CYC1;NDUFV3;NDUFV2;NDUFV1;COX8A;NDUFA8;NDUFA6;NDUFA5;NDUFA3;NDUFA2;SDHD;ATP5F1;COX6B1;NDUFS7;UQCRQ;NDUFS4;NDUFAB1;UQCRC1;NDUFS2;UBA1							Cardiac Hypertrophic Response WP2795	17/55	0.0134838	0.0754047	2.05271	8.83949	MEF2A;GSK3B;CAMK2D;MAP3K1;CHUK;FGF2;TGFBR1;IKBKB;CDK9;CDK7;AKT2;AKT1;MAP2K7;CALM1;MAP3K7;PRKG1;MAPK3
	Endothelial Cells	9/246	0.999995	0.999996	0.171741	8.82703e-07	PLAC8;CLIC4;RGCC;FOXF1;ID1;S100A13;CD9;CD55;PLEC							EBV LMP1 signaling WP1243	2021-04-22	0.574365	0.90337	1.01718	0.564019	IKBKB;HSP90AA1;CHUK;MAP3K7							Signaling by EGFR in cancer	37/111	6.77748e-05	0.000898103	2.30206	22.0982	GSK3B;CDKN1A;CLTC;ITPR2;AP2A1;PIK3R1;CBL;CDC42;NRAS;AKT2;ADRBK1;MLST8;AP2S1;AKT1;CSK;RPS27A;EPS15;AP2M1;MAPK3;HSP90AA1;CHUK;BAD;ADAM10;PTPN11;EPS15L1;ADAM17;CREB1;PIK3CA;PRKAR1A;RPS6KB2;CDK1;TRIB3;KRAS;CALM1;SOS1;STAM2;UBA52							RANKL/RANK signaling pathway WP2018	17/55	0.0134838	0.0754047	2.05271	8.83949	LYN;CHUK;SYK;STAT1;TNFRSF11B;PIK3R1;CBL;PTK2;IKBKB;CDC42;MAPK9;AKT2;AKT1;TAB2;MAP2K7;MAP3K7;MAPK3
	Monocytes	10/176	0.999995	0.999996	0.273712	1.37763e-06	PYCARD;LYN;CD53;VCAN;ITGAM;MRC1;TET2;LTA4H;RHOC;LY6E							TYROBP Causal Network WP3625	1958-10-01	0.607977	0.947041	0.953463	0.47446	PYCARD;ABCC4;ITGAM;GPX1;FKBP15;RPS6KA1;SPP1;CAPG;SH2B3;TGFBR1							Androgen receptor proteolysis and transcription regulation	24/61	6.86233e-05	0.000898103	2.98229	28.5909	VAV3;MED1;TMF1;KDM4C;UBE2I;NCOA6;PRKDC;XRCC5;SRF;NCOA4;PAWR;RANBP9;UBE3A;BRCA1;PIAS1;CCND3;CDK6;UBA3;AKT1;TCF4;HNRNPA1;PATZ1;APPL1;PELP1							Energy Metabolism WP1541	15/47	0.0145245	0.0804435	2.1504	9.1003	NCOA1;MEF2A;GSK3B;MED1;PRKAA1;PRMT1;NRF1;TFB2M;PPRC1;SIRT1;CREB1;MYBBP1A;UCP2;TFAM;GABPA
	Macrophages	12/204	0.999995	0.999996	0.283681	1.40628e-06	CD53;IFNAR2;DUSP5;NCEH1;ITGAM;SYK;GPNMB;MRC1;UCP2;F13A1;RBPJ;TGFBR1							Adipogenesis genes WP447	23/134	0.62679	0.967048	0.948105	0.442901	MEF2A;NCOA1;WNT5B;STAT1;SERPINE1;STAT3;EBF1;HMGA1;HIF1A;AGPAT2;ZMPSTE24;KLF7;CREB1;RBL1;NCOR1;KLF5;NAMPT;E2F1;TRIB3;PLIN2;E2F4;IL6ST;LPIN2							Clathrin derived vesicle budding	24/61	6.86233e-05	0.000898103	2.98229	28.5909	NAPA;SNAPIN;TFRC;SORT1;CLTC;AP4E1;AP1B1;ARRB1;AP3B1;PIK3C2A;CLINT1;IGF2R;DNM2;TGOLN2;BLOC1S6;SNX2;AP1G1;BLOC1S1;CPD;AP1S1;SNX9;SNX5;SH3D19;PICALM							Copper homeostasis WP3286	16/52	0.0169771	0.0931317	2.03897	8.3106	APP;GSK3B;PRNP;ADAM10;XIAP;COMMD1;ATOX1;ADAM17;CCS;PIK3CA;APC;CASP3;MTF2;AKT1;ADAM9;COX11
	Adipocytes	5/210	0.999995	0.999996	0.1104	5.41237e-07	PIKFYVE;PXMP2;ACADSB;PTGES;BCAT2							p38 MAPK Signaling Pathway WP350	1936-06-01	0.645903	0.968325	0.915307	0.400086	CDC42;MAP3K1;CREB1;STAT1;MAP3K7;TGFBR1							Signaling by NGF	63/221	6.89847e-05	0.000898103	1.83986	17.6288	ATF1;GSK3B;CDKN1A;ITSN1;CLTC;AP2A1;PIK3CB;IKBKB;PPP2R1B;PPP2R1A;AKT2;CASP3;RPS6KA1;MLST8;AKT1;AP2M1;MEF2A;PSENEN;VAV3;PRKCI;DUSP3;CHUK;RIPK2;ARHGEF16;ARHGEF18;DNM2;TIAM1;ADAM17;CREB1;PIK3CA;PRKAR1A;TRIB3;ARHGEF2;SOS1;UBA52;CRK;SOS2;ITGB3BP;HDAC2;HDAC3;MAGED1;ITPR2;FURIN;PIK3R1;RTN4;FGD3;PPP2CA;NRAS;RAP1A;ADRBK1;AP2S1;RPS27A;ECT2;MAPK3;KIDINS220;BAD;STAT3;BRAF;NET1;RPS6KB2;CDK1;KRAS;CALM1							Hereditary leiomyomatosis and renal cell carcinoma pathway WP4206	2021-08-20	0.0172602	0.0937915	3.05608	12.4057	EGLN1;PRKAA1;PDHA2;PDHA1;CUL3;KEAP1;HIF1A;NFE2L2
	Dendritic Cells	11/199	0.999995	0.999996	0.265565	1.29454e-06	PLAC8;CD53;PPP1R14A;BATF3;RAB30;CR2;VCAN;CAMK2D;ITGAM;CADM1;KIT							Leptin Insulin Overlap WP578	2021-03-18	0.651021	0.968325	0.915378	0.392893	STAT3;AKT1;DGKZ							Chronic myeloid leukemia	27/73	8.7962e-05	0.00113446	2.69944	25.209	CDKN1A;HDAC2;CTBP2;ARAF;PIK3CB;PIK3R1;CBL;CRKL;IKBKB;NRAS;AKT2;E2F1;AKT1;MAPK3;SMAD4;CHUK;BAD;BRAF;PTPN11;TGFBR1;CDK6;PIK3CA;CDK4;KRAS;SOS1;CRK;SOS2							TNF-alpha signaling pathway WP231	25/92	0.0181404	0.0976528	1.7129	6.86806	CUL1;TANK;IKBKB;PPP2CA;MAPK9;NRAS;TBK1;CASP3;RFK;AKT1;FADD;MAP2K7;MAP3K7;MAPK3;TRAP1;HSP90AA1;CREBBP;MAP3K1;CHUK;BAD;TAB3;BAX;KRAS;TAB2;SOS1
	Basophils	9/169	0.999995	0.999996	0.255602	1.24039e-06	NT5C3A;WRN;ITGAM;ACSS2;NFIL3;PERP;ID1;F13A1;GPC4							Wnt Signaling Pathway WP403	1960-10-01	0.652939	0.968325	0.915213	0.390129	MAPK10;GSK3B;MAPK9;CCND3;PRKCI;WNT5B;APC;PPP2R5E;PPP2R5C;PAFAH1B1							Colorectal cancer	24/62	9.308e-05	0.00118936	2.90363	26.9517	SMAD2;GSK3B;SMAD4;DCC;BAD;ARAF;BRAF;PIK3CB;PIK3R1;TGFBR1;MSH6;MAPK10;MAPK9;MSH2;PIK3CA;APC;MSH3;AKT2;CASP3;AKT1;BAX;KRAS;APPL1;MAPK3							EGFR Tyrosine Kinase Inhibitor Resistance WP4806	23/84	0.0208652	0.110721	1.73053	6.69659	GSK3B;BAD;STAT3;ARAF;BRAF;PIK3CB;PIK3R1;FGF2;NRAS;PIK3CA;RPS6KB1;AKT2;ERBB2;RPS6KB2;EIF4EBP1;AKT1;BAX;KRAS;SOS1;SOS2;EIF4E;JAK1;MAPK3
	Gamma Delta T Cells	7/146	0.999995	0.999996	0.229004	1.10508e-06	TOP2A;ASPM;CENPF;PCNA;UBE2C;MKI67;AURKB							Hypothetical Network for Drug Addiction WP1246	2021-05-31	0.675458	0.968325	0.880072	0.345309	GRIA2;CREB1;KRIT1;DRD1;MAPK3							Myc active pathway	30/85	9.99103e-05	0.00126492	2.50931	23.1138	TFRC;IREB2;RPL11;ENO1;HSPD1;MTDH;PRDX3;PDCD10;RUVBL2;NBN;TK1;EIF4E;DDX18;HSP90AA1;CREBBP;NPM1;SMAD4;HSPA4;TAF10;HMGA1;MINA;CDC25A;SUPT7L;GPAM;CDK4;ID2;POLR3D;BAX;BCAT1;PFKM							Non-homologous end joining WP438	2021-05-10	0.0209525	0.110721	4.58224	17.7126	WRN;XRCC4;PRKDC;XRCC5;LIG4
	Endothelial Cells (Aorta)	10/185	0.999995	0.999996	0.259492	1.25012e-06	ITGB5;CALD1;S100A16;MARVELD1;HSPB8;ATL2;ITGBL1;ACKR3;DOCK1;SH3D19							Ovarian Infertility Genes WP273	2021-05-31	0.675458	0.968325	0.880072	0.345309	DAZL;NCOR1;CDK4;ATM;SYNE2							MicroRNA regulation of DNA damage response	26/70	0.000108812	0.0013651	2.71719	24.7967	CDKN1A;MCM7;BRCA1;CCND3;CASP3;CHEK1;TLK2;E2F1;TLK1;NBN;RFC1;H2AFX;SMC1A;CDC25A;RAD50;CREB1;CDK6;RAD51;RRM2B;CDK4;CCNG1;CDK1;BAX;RAD17;ATM;ATR							Acetylcholine Synthesis WP528	2021-04-07	0.0227923	0.11676	6.10869	23.099	PDHA2;PCYT1A;PDHA1;PEMT
	Microglia	8/158	0.999995	0.999996	0.24243	1.16711e-06	CD53;COLEC12;ITGAM;ITGB5;SPHK1;UCP2;CMTM6;TGFBR1							Orphan GPCRs WP1398	2021-03-19	0.688394	0.968325	0.858115	0.320415	TPRA1;GPR180;GPR137B							RNA polymerase I transcription initiation	13/25	0.000116099	0.001442	4.97309	45.0615	RRN3;CCNH;EHMT2;GTF2H1;TTF1;GTF2H3;CDK7;TAF1C;ERCC2;POLR1C;POLR1D;MNAT1;PTRF							Disorders of the Krebs cycle WP4236	2021-04-07	0.0227923	0.11676	6.10869	23.099	PDHX;SUCLA2;SUCLG2;SUCLG1
	Parietal Cells	4/111	0.999995	0.999996	0.170186	8.08213e-07	TRIM2;ASAP3;SH3BGRL2;CD24							Statin Pathway WP1	2021-03-19	0.688394	0.968325	0.858115	0.320415	ABCA1;SOAT1;HMGCR							Double-strand break repair	2021-12-22	0.000117032	0.001442	5.50778	49.8623	BRIP1;RAD50;RAD51;XRCC4;PRKDC;XRCC5;H2AFX;LIG4;ATM;BRCA1;NBN;TP53BP1							LDLRAD4 and what we know about it WP4904	2021-04-07	0.0227923	0.11676	6.10869	23.099	SMAD2;ATG16L1;PMEPA1;TGFBR1
	B Cells	9/182	0.999995	0.999996	0.236206	1.11696e-06	CD53;SPCS3;CR2;SCD;SWAP70;EBF1;HMGA1;CD24;CD55							Regulation of Cardiac Hypertrophy by miR-208 WP1526	2021-01-06	0.694482	0.968325	0.915425	0.333754	MED13							mRNA stability regulation by proteins that bind AU-rich elements	30/86	0.000127388	0.00155571	2.46435	22.1009	PSMD10;PSMD12;PSMD11;PSMD14;PARN;PSMB10;PSMD8;PSMB6;PSMD9;PSMB7;PSMD6;EXOSC5;XPO1;AKT1;PSMD1;TNPO1;RPS27A;EXOSC2;EXOSC1;DIS3;YWHAZ;PSMA3;PSMA4;PSMC6;PSMA1;PSMC1;PSME4;PSMC2;PSME1;UBA52							TGF-beta receptor signaling in skeletal dysplasias WP4816	17/58	0.022906	0.11676	1.90216	7.18323	SMAD2;CREBBP;SMAD4;ZFYVE9;STAT1;SERPINE1;STAT3;SMAD9;LTBP3;SMAD5;TGFBR1;RUNX2;MAPK9;SPP1;SKIL;JAK1;MAPK3
	Immature Neurons	6/136	0.999995	0.999996	0.209936	9.88631e-07	GRIA2;CREB1;STIM2;KIF1B;ROBO1;CLASP2							Robo4 and VEGF Signaling Pathways Crosstalk WP3864	2021-01-06	0.694482	0.968325	0.915425	0.333754	SLIT2							ERBB signaling pathway	32/94	0.000130824	0.00158366	2.37472	21.2339	GSK3B;CDKN1A;CAMK2D;ARAF;PIK3CB;PIK3R1;CBL;CRKL;MAPK9;NRAS;AKT2;ERBB2;EIF4EBP1;AKT1;ABL2;MAP2K7;PAK2;NCK1;MAPK3;PAK4;HSP90AA1;BAD;BRAF;PTK2;MAPK10;PIK3CA;RPS6KB1;RPS6KB2;KRAS;SOS1;CRK;SOS2							Photodynamic therapy-induced HIF-1 survival signaling WP3614	1937-12-01	0.0240565	0.121151	2.2011	8.20426	EGLN1;PFKL;PDHA1;SLC16A1;ANGPT1;IGFBP3;SERPINE1;PGK1;BAX;BAK1;HIF1A;HK1
	Retinal Ganglion Cells	8/164	0.999995	0.999996	0.233019	1.08819e-06	GRIA2;CA10;NARF;PIANP;RBPMS;SNX16;SCAPER;YDJC							mir-193a and MVP in colon cancer metastasis WP3979	2021-01-06	0.694482	0.968325	0.915425	0.333754	CAPRIN1							Fas signaling pathway	37/115	0.00015535	0.0018642	2.18347	19.1486	NFAT5;ROCK1;PRKDC;CLTC;XIAP;PIK3R1;PIK3CB;ACTB;IKBKB;MAPK9;CASP3;AKT1;CYC1;FADD;BAK1;MAP2K7;MAPK6;MAP3K7;PAK2;MAPK3;CSNK1G3;CASP8AP2;MAP3K1;CHUK;RFC1;SYK;RIPK2;CSNK1A1;NFATC3;PAWR;HIPK3;MAPK10;PIK3CA;SLTM;BAX;CSNK1G2;PLEC							TGF-beta Receptor Signaling WP560	16/54	0.0242671	0.121151	1.93142	7.18223	SMAD2;CREBBP;SMAD4;ZFYVE9;STAT1;SERPINE1;STAT3;SMAD9;SMAD5;TGFBR1;RUNX2;MAPK9;SPP1;SKIL;JAK1;MAPK3
	Retinal Progenitor Cells	4/112	0.999995	0.999996	0.1686	7.82736e-07	SOX2;GRIA2;GALNT13;MAP1B							Endochondral Ossification WP1270	1962-10-01	0.694855	0.968325	0.879904	0.320331	CAB39;STAT1;SPP1;AKT1;ENPP1;CALM1;FGF2;SLC38A2;RUNX2;BMPR1A							Netrin-mediated signaling events	15/32	0.000159263	0.00189469	4.05151	35.4303	YES1;MYO10;DCC;UNC5B;PIK3R1;WASL;PTK2;CDC42;PIK3CA;MAP1B;ELMO1;DOCK1;BCAR1;MAPK3;NCK1							Relationship between inflammation, COX-2 and EGFR WP4483	2021-09-25	0.0245743	0.121151	2.57866	9.55667	NRAS;PIK3CA;PTGES2;AKT2;AKT1;BRAF;KRAS;PIK3CB;MAPK3
	Oligodendrocyte Progenitor Cells	5/125	0.999995	0.999996	0.189589	8.75793e-07	GRIA2;VCAN;CA10;CNP;ALDOC							G Protein Signaling Pathways WP232	15/92	0.699346	0.968325	0.891216	0.318708	PRKCI;PDE4D;GNAI3;AKAP12;GNA13;NRAS;GNG10;AKAP11;PRKAR1A;PRKD3;GNB2;GNAQ;KRAS;CALM1;PDE8A							Association of TriC/CCT with target proteins during biosynthesis	14/29	0.000177994	0.00206324	4.28492	36.995	CCT3;ARFGEF2;FBXW5;SPHK1;FBXW9;CCT6A;AP3M1;KIF13A;LONP2;FBXO6;FBXL3;CCT7;FBXL5;CCT4							Fluoropyrimidine Activity WP1601	1933-11-01	0.0246089	0.121151	2.29259	8.49323	SMUG1;ABCC4;RRM1;PPAT;FPGS;XRCC3;ERCC2;GGH;TK1;UPP1;SLC29A1
	Neural Stem/Precursor Cells	7/152	0.999995	0.999996	0.219447	1.01096e-06	SOX2;GRIA2;CBX3;IGFBP3;PBK;ALDOC;TMTC4							Id Signaling Pathway WP512	1951-08-01	0.717236	0.98468	0.851249	0.282913	ELK4;CCNA2;SMAD4;RBL1;ID2;TCF12;ID1;SMAD5							BARD1 signaling events	14/29	0.000177994	0.00206324	4.28492	36.995	BARD1;NPM1;PCNA;PRKDC;XRCC5;FANCA;BRCA1;FANCG;RAD50;RAD51;ATM;NBN;TOPBP1;ATR							PDGFR-beta pathway WP3972	2021-10-29	0.0248352	0.121229	2.41302	8.91729	MAP3K1;PIK3CA;STAT1;SRF;RASA1;STAT3;PIK3R1;SOS1;JAK1;MAPK3
	T Cells	6/165	0.999995	0.999996	0.17134	7.80438e-07	CD53;BATF3;MAFF;MBD2;BRAF;JUNB							Steroid Biosynthesis WP55	2021-02-14	0.744854	0.999996	0.762742	0.224679	HSD17B1;HSD17B4							Aurora B signaling	17/39	0.000179318	0.00206324	3.54905	30.6153	NPM1;CUL3;CDCA8;NCAPG;PEBP1;KIF23;SMC4;AURKB;NDC80;SMC2;KLHL9;PPP1CC;PSMA3;SGOL1;RASA1;TACC1;EVI5							3q29 copy number variation syndrome WP4906	18/63	0.0252894	0.122409	1.83509	6.7483	PCYT1A;TFRC;NCBP1;NCBP2;CEP350;MYCBP2;RNF8;ADAM10;FBXO45;SIRT1;HIF1A;DLG1;SENP5;AKT1;FGFR1OP;NF2;DYNLRB1;PAK2
	GABAergic Neurons	4/113	0.999995	0.999996	0.167043	7.60836e-07	GRIA2;CA10;SEMA3C;CBLN4							Fatty Acid Omega Oxidation WP33	2021-01-07	0.749278	0.999996	0.762808	0.220181	ALDH2							p75 neurotrophin receptor-mediated signaling	39/124	0.000179412	0.00206324	2.11224	18.2199	APP;ZNF274;HDAC2;HDAC3;MAGED1;ITSN1;XIAP;FURIN;PIK3R1;RTN4;IKBKB;FGD3;MAPK9;CASP3;E2F1;AKT1;ECT2;RPS27A;PSENEN;VAV3;PRKCI;CHUK;RIPK2;BAD;SORT1;ARHGEF16;ARHGEF18;RHOC;RHOB;NET1;MAPK10;TIAM1;ADAM17;PIK3CA;ARHGEF2;SOS1;UBA52;SOS2;ITGB3BP							Synaptic signaling pathways associated with autism spectrum disorder WP4539	15/50	0.0256458	0.1231	1.96572	7.20115	GSK3B;PRKAA1;HOMER1;UBE3A;PIK3CB;PIK3R1;NRAS;PIK3CA;RPS6KB1;RHEB;AKT2;EIF4EBP1;AKT1;KRAS;MAPK3
	Proximal Tubule Cells	4/164	0.999995	0.999996	0.113442	5.15351e-07	GSTZ1;ASL;PRAP1;OTC							Hfe effect on hepcidin production WP3673	2021-01-07	0.749278	0.999996	0.762808	0.220181	ID1							HIV-1 elongation complex formation in the absence of HIV-1 Tat	2021-10-17	0.000192102	0.00219092	6.55441	56.0893	CDK9;SUPT16H;CCNT2;ELL;NCBP1;NCBP2;ERCC2;TCEA1;GTF2H1;GTF2H3							Envelope proteins and their potential roles in EDMD physiopathology WP4535	14/46	0.0270177	0.128613	2.00647	7.2459	SMAD2;SMAD4;SRF;TAZ;SYNE2;NRAS;KIF5B;BANF1;KRAS;SOS1;EMD;SOS2;MAPK3;PLEC
	Glycinergic Neurons	3/100	0.999995	0.999996	0.140846	6.35735e-07	GRIA2;PIANP;CKB							Type II interferon signaling (IFNG) WP1253	1934-05-01	0.754574	0.999996	0.788886	0.222152	STAT1;IFNGR1;PTPN11;IRF9;JAK1							YAP1- and WWTR1 (TAZ)-stimulated gene expression	13/26	0.000194171	0.00219636	4.59026	39.2319	YAP1;NCOA1;TEAD4;MED1;CREBBP;CHD9;NCOA6;NCOA3;RUNX2;TBL1XR1;TGS1;TEAD1;TEAD2							The Overlap Between Signal Transduction Pathways that Contribute to a Range of LMNA Laminopathies WP4879	16/55	0.0286911	0.135459	1.88178	6.68251	SMAD2;GSK3B;CDKN1A;CREBBP;CSNK1A1;TNFRSF11B;NAP1L1;ACTB;RUNX2;ZMPSTE24;APC;CDK4;E2F1;SPP1;JUNB;EMD
	Keratinocytes	5/127	0.999995	0.999996	0.186458	8.41123e-07	KLF5;PERP;TACSTD2;CD24;PLEC							Eicosanoid Lipid Synthesis Map WP4335	2021-01-09	0.831154	0.999996	0.572036	0.105793	PTGES							Downregulation of SMAD2/3-SMAD4 transcriptional activity	2021-12-23	0.000204827	0.00227953	5.00677	42.5242	SMAD2;PPM1A;SMAD4;TGIF2;NCOR1;USP9X;UBE2D1;RPS27A;SKIL;UBA52;RNF111;TRIM33							Transcription co-factors SKI and SKIL protein partners WP4533	2021-07-18	0.0299251	0.140137	2.91653	10.2343	TEAD4;HDAC3;SIN3A;SKIL;TEAD1;TEAD2;STK3
	Megakaryocytes	6/143	0.999996	0.999996	0.199123	8.93208e-07	PLK3;ITGAM;KIF5B;F13A1;CD9;CIB1							Methylation WP1247	2021-01-09	0.831154	0.999996	0.572036	0.105793	MAT2B							Post-elongation processing of intronless pre-mRNA	2021-12-23	0.000204827	0.00227953	5.00677	42.5242	LSM10;NCBP1;NCBP2;PCF11;CPSF3;CSTF3;CPSF2;CSTF2;SNRPG;SNRPE;SNRPD3;SNRPB							Ebola Virus Pathway on Host WP4217	32/129	0.0305911	0.14122	1.51461	5.28152	ITGB1;TSG101;CLTC;VPS4A;CLTB;IQGAP1;PIK3R1;PIK3CB;ACTB;CDC42;TBK1;VPS11;AKT1;FLNA;FLNC;EPS15;KPNA1;MAPK3;VPS18;CREBBP;RFC1;STAT1;VPS33A;RHOC;RHOB;TIAM1;ADAM17;PIK3CA;VPS41;RAB9A;TOP1;RAB5A
	NK Cells	5/157	0.999996	0.999996	0.149381	6.69618e-07	CD53;HMBOX1;ITGAM;KIT;DOCK2							Eicosanoid metabolism via Cyclo Oxygenases (COX) WP4347	1931-04-01	0.832209	0.999996	0.677751	0.124484	ACOX3;PTGR1;PTGR2;PTGES							Integrin signaling pathway	46/155	0.000229758	0.00253653	1.94379	16.286	ITGB1;GRB7;ROCK1;ROCK2;ARPC1B;ILK;ACTB;CRKL;CDC42;MAPK9;NRAS;RAP1A;CAPN7;AKT2;TSPAN6;TSPAN4;AKT1;CSK;CAPN1;MAPK6;MAP3K4;MAPK3;VASP;MAP3K2;MAP3K1;RHOG;ARPC4;BRAF;RHOF;RHOC;PTK2;RHOB;MAPK10;TSPAN15;TSPAN14;TSPAN13;PIK3CA;ARPC3;KRAS;SOS1;CRK;DOCK1;SOS2;ITGB3BP;RHOQ;BCAR1							BDNF-TrkB Signaling WP3676	1934-11-01	0.0306466	0.14122	2.19278	7.64233	NRAS;CREB1;HOMER1;RPS6KB1;RHEB;RPS6KA1;EIF4EBP1;AKT1;BRAF;KRAS;SOS1
	Purkinje Neurons	6/155	0.999996	0.999996	0.182952	8.19835e-07	GRIA2;CA10;MRPS35;PDE5A;PRKG1;HDAC6							White fat cell differentiation WP2872	1932-04-01	0.850585	0.999996	0.653506	0.105757	KLF5;CREB1;CTNNA1;EBF1							Signaling by the B cell receptor (BCR)	45/151	0.00024084	0.00263777	1.95516	16.2891	PSMD10;GSK3B;PSMD12;CDKN1A;PSMD11;PSMD14;CUL1;ITPR2;PIK3R1;CBL;MALT1;PSMB10;PSMD8;IKBKB;PSMB6;PSMD9;PSMB7;PSMD6;NRAS;AKT2;MLST8;AKT1;PSMD1;RPS27A;MAP3K7;NCK1;LYN;CHUK;SYK;BAD;PSMA3;CREB1;PSMA4;PSMC6;PSMA1;PSMC1;PSME4;PSMC2;RPS6KB2;PSME1;TRIB3;KRAS;CALM1;SOS1;UBA52							Integrin-mediated Cell Adhesion WP185	26/101	0.0313589	0.142542	1.59106	5.50867	ITGB1;ITGAM;ITGB5;ROCK1;ROCK2;ARAF;ILK;CDC42;RAP1A;CAPN7;AKT2;AKT1;CSK;CAPN1;MAPK6;PAK2;PAK4;VASP;VAV3;BRAF;PTK2;MAPK10;SOS1;CRK;DOCK1;BCAR1
	Pericytes	4/155	0.999996	0.999996	0.12027	5.36749e-07	MYO1B;ANGPT1;GNB4;PDE5A							Parkinsons Disease Pathway WP3638	1939-05-01	0.852852	0.999996	0.672668	0.107068	ATXN2;CASP3;HTRA2;UBA1;EPRS							Global genomic nucleotide excision repair (GG-NER)	15/33	0.000243815	0.00264933	3.82619	31.8305	RFC3;PCNA;RFC1;CCNH;RFC2;GTF2H1;GTF2H3;CDK7;ERCC4;ERCC1;POLE2;POLD2;ERCC2;MNAT1;POLE							PI3K-AKT-mTOR signaling pathway and therapeutic opportunities WP3844	2021-10-30	0.0314285	0.142542	2.29223	7.93119	GSK3B;NRAS;PIK3CA;BAD;RHEB;EIF4EBP1;AKT1;KRAS;PIK3R1;PIK3CB
	Neuroblasts	6/146	0.999996	0.999996	0.19482	8.69185e-07	SOX2;MAP1B;TACC3;RCOR2;SIRT1;EZH2							Osteoblast WP238	2021-01-10	0.861441	0.999996	0.508446	0.0758339	TNFRSF11B							Fatty acid, triacylglycerol, and ketone body metabolism	50/173	0.000256418	0.00276451	1.87284	15.4859	SLC25A1;ACADVL;CHD9;CCNC;MED16;LCLAT1;MED15;MED11;MED13;SIN3A;ACADM;TEAD1;TEAD2;NCOA1;TEAD4;MED1;ELOVL5;NCOA6;NCOA3;MED9;ELOVL6;ACSL3;MED27;MUT;MED29;MED7;MED23;NCOR1;TBL1XR1;GPD2;TRIB3;PLIN2;TNFRSF21;AGPAT5;YAP1;ECHS1;HDAC3;NRF1;HMGCR;HSD17B12;AGPAT2;TGS1;FDFT1;ABCA1;CREBBP;GK;TXNRD1;MED13L;GPAM;LPIN2							Glycolysis in senescence WP5049	2021-05-11	0.0328323	0.147746	3.8183	13.0446	PRKAA1;PGK1;ALDOC;ENO1;HK1
	Photoreceptor Cells	6/149	0.999996	0.999996	0.190698	8.50024e-07	PCSK2;GRIA2;CA10;KIF1B;NLK;GLS							PPAR signaling pathway WP2316	1981-11-01	0.881445	0.999996	0.718418	0.0906589	RXRB;SCP2;GK;FABP5;ILK;OLR1;ACADM;ACSL3;ACOX3;SLC27A5;SLC27A4							p53 activity regulation	37/118	0.00027736	0.00296069	2.10221	17.2175	RPL5;GSK3B;CDKN1A;PCNA;CSE1L;SERPINE1;RPL11;UBE2D1;PPP2CA;MAPK9;CCND3;TRIM28;PPP2R4;ZMAT3;CASP3;PERP;CHEK1;E2F1;AKT1;SKP2;CSNK1G3;CREBBP;CSNK1A1;IGFBP3;CCNA2;CDK6;TP53I3;RRM2B;CDK4;CCNG1;CDK1;PIN1;BAX;ATM;MDM4;CSNK1G2;ATR							Breast cancer pathway WP4262	37/154	0.033864	0.150382	1.45217	4.91618	GSK3B;CDKN1A;ARAF;PIK3R1;BRCA1;FGF2;LRP6;NRAS;FRAT2;AKT2;ERBB2;E2F1;AKT1;NBN;POLK;BAK1;MAPK3;NCOA1;WNT5B;CSNK1A1;NCOA3;BRAF;RAD50;CDK6;RAD51;PIK3CA;RPS6KB1;APC;CDK4;KIT;RPS6KB2;BAX;ATM;KRAS;SOS1;SOS2;ATR
	B Cells Naive	4/151	0.999996	0.999996	0.123573	5.46958e-07	CD53;CR2;BRAF;ZNF286A							Ptf1a related regulatory pathway WP201	2021-01-11	0.886297	0.999996	0.457573	0.0552306	RBPJ							Activation of the pre-replicative complex	14/30	0.000278906	0.00296069	4.01687	32.8766	CDT1;MCM7;MCM8;MCM10;ORC4;POLA1;DBF4;ORC3;POLE2;ORC2;MCM4;MCM5;POLE;MCM2							16p11.2 proximal deletion syndrome WP4949	20/74	0.0339404	0.150382	1.69918	5.74857	CCT3;INO80E;PCNA;HDAC3;IGFBP3;KMT2C;MAZ;KIF22;PPP2CA;CCT6A;PPP4C;PPP4R2;PPP2R1A;PPP4R4;TAOK2;CCDC6;CCT7;CCT4;MAPK3;BPTF
	Neutrophils	2/151	0.999996	0.999996	0.0609158	2.69585e-07	ITGAM;CD24							Heart Development WP2067	1944-05-01	0.915938	0.999996	0.586249	0.0514766	SMAD4;SRF;NFATC3;PTPN11;BMPR1A							Destabilization of mRNA by AUF1 (hnRNP D0)	24/66	0.000286607	0.00301922	2.62645	21.425	PSMD10;PSMD12;PSMD11;PSMD14;PSMB10;PSMD8;PSMB6;PSMD9;PSMB7;PSMD6;PSMA3;PSMA4;PSMC6;PSMA1;CDK4;PSMC1;MRC1;PSME4;PSMC2;PSME1;PSMD1;TCEB2;RPS27A;UBA52							Regulation of Actin Cytoskeleton WP51	36/150	0.0364905	0.160447	1.44996	4.8004	NCKAP1;ROCK1;ROCK2;BRK1;IQGAP1;PIK3R1;PIK3CB;PIK3C2A;FGF2;ACTB;CDC42;GNA13;NRAS;CFL2;CSK;MAPK6;MYH10;PAK2;GIT1;PAK4;MAPK3;PPP1R12A;RDX;LIMK1;BRAF;PTK2;ENAH;DIAPH3;PIK3CA;APC;KRAS;SOS1;SOS2;CRK;DOCK1;BCAR1
	Taste Receptor Cells	4/115	0.999996	0.999996	0.164013	7.25531e-07	PCSK2;GRIA2;ZNF493;TAS2R20							Wnt Signaling in Kidney Disease WP3857	1937-04-01	0.918757	0.999996	0.55432	0.0469696	MAPK10;MAPK9;WNT5B;LRP6							Post-translational protein modification	55/196	0.000298048	0.00311595	1.79768	14.5941	B4GALT2;GALNT11;B4GALT3;PGAP1;GALNT13;PIGN;MPI;MANEA;GMPPB;C1GALT1C1;MAN1A2;GMPPA;PGM3;GNPNAT1;PDIA3;ST6GAL1;ALG6;DHPS;ALG3;ALG13;ALG10;SUMF2;DDOST;DPM1;DPM3;PIGA;CANX;PIGK;B3GNT2;PREB;SEC23A;RPN2;SAR1B;FURIN;LMAN1;FUT8;MAN2A1;ARSK;MGAT3;MAN1C1;MGAT1;MGAT2;UGGT2;ST3GAL1;UGGT1;EDEM3;GALNT7;SEC24A;GALNT1;C1GALT1;GFPT1;DOHH;DOLPP1;MGAT4B;SEC24D							MicroRNAs in cardiomyocyte hypertrophy WP1544	22/84	0.0377538	0.16311	1.62804	5.33454	GSK3B;CAMK2D;CISH;CHUK;ROCK1;ROCK2;STAT3;PIK3CB;PIK3R1;FGF2;LRP6;IKBKB;CDK9;CDK7;PIK3CA;AKT2;AKT1;IL6ST;MAP2K7;CALM1;PRKG1;MAPK3
	Plasmacytoid Dendritic Cells	4/150	0.999996	0.999996	0.124427	5.49585e-07	CD53;MAP3K2;ITGAM;TCF4							Spinal Cord Injury WP2432	13/99	0.92073	0.999996	0.690788	0.0570513	ROCK2;RHOC;RTN4;RHOB;GJA1;VCAN;CDK4;CASP3;CCNG1;CDK1;E2F1;SLIT2;MAPK3							ERBB2/ERBB3 signaling events	18/44	0.000306825	0.00316238	3.1798	25.7222	BAD;DOCK7;STAT3;PTPN11;PIK3CB;PIK3R1;RNF41;CDC42;MAPK10;MAPK9;NRAS;PIK3CA;ERBB2;AKT1;KRAS;NF2;SOS1;MAPK3							Biomarkers for pyrimidine metabolism disorders WP4584	2021-06-15	0.0379801	0.16311	3.05493	9.99175	NT5C3A;NT5C;RRM1;RRM2B;PUS1;CKB
	Pyramidal Cells	5/130	0.999996	0.999996	0.181949	8.03067e-07	GRIA2;CA10;CCM2;YWHAZ;RTN4							Inflammatory Response Pathway WP458	2021-03-30	0.924713	0.999996	0.508171	0.0397753	IL5;LAMB1;LAMC1							E2F transcription factor network	26/74	0.000307072	0.00316238	2.49015	20.1414	CDKN1A;SERPINE1;BRCA1;UXT;CCND3;TRIM28;RBBP4;E2F1;MYBL2;TK1;TOPBP1;E2F4;E2F6;E2F7;RANBP1;CREBBP;RRM1;SIRT1;CDC25A;CCNA2;POLA1;RBL1;RYBP;CDK1;ATM;HBP1							Phytochemical activity on NRF2 transcriptional activation WP3	2021-06-15	0.0379801	0.16311	3.05493	9.99175	GCLC;PIK3CA;KEAP1;SLC7A11;GCLM;NFE2L2
	T Helper Cells	2/148	0.999996	0.999996	0.0621789	2.73421e-07	CD53;IL5							Nuclear Receptors WP509	1938-04-01	0.928455	0.999996	0.537984	0.0399361	RXRB;NR1H2;NR1D2;NR2C2							RNA polymerase I transcription	21/55	0.000313033	0.00319989	2.83788	22.8995	RRN3;CCNH;CBX3;EHMT2;H2AFX;HIST1H2AJ;MBD2;GTF2H1;TTF1;GTF2H3;HIST2H2BE;CDK7;HIST1H3A;TAF1C;POLR1C;ERCC2;POLR1D;MNAT1;PTRF;HIST1H2BC;MAPK3							Ethanol effects on histone modifications WP3996	2021-10-31	0.0391609	0.16311	2.18294	7.07289	HDAC2;AHCY;ACSS2;HDAC3;ALDH2;EHMT2;HAT1;MTR;HDAC6;SLC19A1
	B Cells Memory	3/147	0.999996	0.999996	0.0946018	4.15102e-07	CD53;CR2;TRAF4							Lung fibrosis WP3632	1961-07-01	0.938164	0.999996	0.592551	0.037823	IL5;PARN;SPP1;ATP11A;FGF2;SKIL;NFE2L2							RNA degradation	22/59	0.000336737	0.00341689	2.73223	21.8475	HSPA9;TTC37;DDX6;ZCCHC7;PNPT1;DIS3;PARN;WDR61;ENO1;LSM5;LSM4;HSPD1;LSM2;EXOSC5;LSM7;EXOSC10;PAPOLG;C1D;CNOT8;EXOSC2;SKIV2L2;EXOSC1							Peroxiredoxin 2 induced ovarian failure WP4873	2021-04-08	0.0391924	0.16311	4.58124	14.8399	MAPK10;PRDX2;CASP3;BAX
	T Memory Cells	5/133	0.999996	0.999996	0.177652	7.75771e-07	CD53;SP100;ITGB5;ENPP1;KPNA4							GPCRs, Class C Metabotropic glutamate, pheromone WP327	2021-01-15	0.948444	0.999996	0.326758	0.0172962	GPRC5C							Y branching of actin filaments	2021-11-21	0.000362344	0.00364989	5.04738	39.99	ACTR3;CDC42;ACTR2;NCKAP1;ARPC3;ARPC1B;PIR;ABL2;ARPC4;WASL;NCK1							Cell Differentiation - Index expanded WP2023	2021-07-19	0.0402377	0.16311	2.67333	8.58926	MEF2A;SOX2;SRF;ID2;STAT3;RUNX2;EZH2
	Enteroendocrine Cells	5/139	0.999996	0.999996	0.169635	7.38281e-07	PCSK2;GRIA2;CA10;TRPA1;FABP5							Iron Homeostasis WP1596	2021-01-15	0.948444	0.999996	0.326758	0.0172962	IREB2							Insulin biosynthesis and processing	17/41	0.000370665	0.00370665	3.2529	25.6986	PCSK2;SLC30A7;SLC30A6;RPN2;EXOC8;EXOC7;SRP54;MYO5A;MAFA;DDOST;SRP9;SPCS3;SRP72;KIF5B;EXOC3;EXOC5;EXOC1							Mitochondrial Gene Expression WP391	2021-07-19	0.0402377	0.16311	2.67333	8.58926	CREB1;TFAM;TFB2M;NRF1;POLRMT;PPRC1;GABPA
	Epsilon Cells	1/138	0.999996	0.999996	0.0331409	1.42488e-07	OTC							Calcium Regulation in the Cardiac Cell WP553	19/147	0.959663	0.999996	0.677727	0.0279041	CAMK2D;GNAI3;ITPR2;ATP2A2;ARRB1;ATP2B1;ATP1B1;YWHAZ;GJA1;PRKAR1A;GNB2;GNAQ;GRK6;GNB4;ANXA6;RGS10;PKIG;YWHAG;CDK5RAP2							Rac1 cell motility signaling pathway	25/71	0.000382899	0.00380144	2.49808	19.6542	NCKAP1;ARPC1B;BRK1;IQGAP1;PIK3R1;ARHGAP5;MAPK9;CTNNA1;ARFIP2;MAP2K7;PAK2;ACTR3;ACTR2;RALBP1;MAP3K1;CADM1;LIMK1;STAT3;ARPC4;PIK3CA;RPS6KB1;ARPC3;ABI1;CRK;BCAR1							Serotonin Receptor 4/6/7 and NR3C Signaling WP734	2021-07-19	0.0402377	0.16311	2.67333	8.58926	ATF1;ELK4;CREB1;RAP1A;SRF;BRAF;MAPK3
	Kupffer Cells	2/137	0.999996	0.999996	0.0672908	2.8864e-07	CD53;ITGAM							Complement Activation, Classical Pathway WP200	2021-01-17	0.965286	0.999996	0.285879	0.0101005	CD55							Lipid metabolism regulation by peroxisome proliferator-activated receptor alpha (PPAR-alpha)	35/112	0.000429073	0.00422944	2.09122	16.215	YAP1;HDAC3;CHD9;CCNC;NRF1;HMGCR;MED16;MED15;MED11;MED13;SIN3A;TGS1;ACADM;TEAD1;TEAD2;FDFT1;ABCA1;NCOA1;TEAD4;MED1;CREBBP;NCOA6;NCOA3;TXNRD1;MED9;MED27;MED29;MED7;MED13L;MED23;NCOR1;TBL1XR1;TRIB3;PLIN2;TNFRSF21							Follicle Stimulating Hormone (FSH) signaling pathway WP2035	2021-09-27	0.040282	0.16311	2.29186	7.36113	CREB1;RPS6KB1;RHEB;GRK6;RPS6KB2;EIF4EBP1;AKT1;MAPK3;APPL1
	Tuft Cells	2/136	0.999996	0.999996	0.0677972	2.90122e-07	ITGAM;CD24							EDA Signalling in Hair Follicle Development WP3652	2021-01-18	0.971515	0.999996	0.269046	0.00777511	EDARADD							Amino acid metabolism	54/195	0.000478346	0.00468168	1.7645	13.4899	AMD1;CCBL1;APIP;MTR;GLS;CNDP2;PSMD8;PSMD9;PSMD6;DBT;PSMD1;PHGDH;ENOPH1;AASS;HIBCH;GAMT;BCKDHA;MCCC1;PSMA3;PSMA4;PSMA1;ETHE1;PSME4;PSME1;SLC25A10;BCAT1;DLD;BCAT2;PSMD10;PSMD12;AHCY;PSMD11;PSMD14;MAT2B;HSD17B10;PSMB10;PSMB6;PSMB7;ASL;PCBD1;CKB;PYCR1;ACADSB;AZIN1;GSTZ1;HAL;GATM;GCLC;PSMC6;CPS1;PSMC1;PSMC2;GCLM;OTC							Intracellular trafficking proteins involved in CMT neuropathy WP4856	2021-09-27	0.040282	0.16311	2.29186	7.36113	FIG4;MTMR2;HSPB8;MFN2;KIF1B;RABAC1;SBF2;RAB11B;DNM2
	Paneth Cells	3/132	0.999996	0.999996	0.105699	4.48151e-07	RAP1A;ATG16L1;RIPK2							Serotonin and anxiety WP2141	2021-01-18	0.971515	0.999996	0.269046	0.00777511	FMR1							Protein folding	20/53	0.000516323	0.00501779	2.78404	21.0718	CCT3;ARFGEF2;FBXW5;VBP1;SPHK1;FBXW9;TBCB;TUBB4B;ACTB;CCT6A;AP3M1;TUBB6;KIF13A;LONP2;FBXO6;FBXL3;CCT7;FBXL5;PFDN5;CCT4							Photodynamic therapy-induced unfolded protein response WP3613	2021-09-27	0.040282	0.16311	2.29186	7.36113	NARS;DNAJC3;HSPA5;DNAJB11;EIF2AK3;TRIB3;HSP90B1;NFE2L2;ATF4
	Alveolar Macrophages	4/123	0.999996	0.999996	0.152912	6.47391e-07	ITGAM;GPNMB;MRC1;OLR1							Small Ligand GPCRs WP353	2021-01-18	0.971515	0.999996	0.269046	0.00777511	CNR2							EGF receptor (ErbB1) signaling pathway	15/35	0.00053274	0.00514113	3.44315	25.9527	STAT1;STAT3;GNAI3;PTPN11;PIK3CB;PIK3R1;WASL;PTK2;NRAS;PIK3CA;RASA1;KRAS;SOS1;MAPK3;NCK1							Hippo-Yap signaling pathway WP4537	2021-08-23	0.0407776	0.16311	2.44442	7.82122	TEAD4;NF2;TAZ;TEAD1;TEAD2;MAP4K3;STK3;SAV1
	Langerhans Cells	4/123	0.999996	0.999996	0.152912	6.47391e-07	CD53;ITGAM;GPNMB;EPCAM							SIDS Susceptibility Pathways WP1266	1961-06-01	0.973218	0.999996	0.498497	0.0135328	REST;CREB1;CTCF;YBX1;CC2D1A;HSPD1							Neurotrophin signaling pathway	38/126	0.000546169	0.00522171	1.987	14.9275	GSK3B;ZNF274;CAMK2D;MAGED1;PIK3R1;PIK3CB;CRKL;IKBKB;CDC42;MAPK9;NRAS;RAP1A;AKT2;RPS6KA1;AKT1;CSK;MAP2K7;SH2B3;YWHAG;MAPK3;MAP3K1;RIPK2;BAD;KIDINS220;SORT1;BRAF;PTPN11;IRAK4;YWHAZ;MAPK10;PIK3CA;BAX;KRAS;CALM1;SOS1;CRK;SOS2;ATF4							Immune response to tuberculosis WP4197	2021-08-23	0.0407776	0.16311	2.44442	7.82122	IFNAR2;STAT1;IFNGR1;PTPN2;IRF9;PIAS1;JAK1;IFNAR1
	Eosinophils	3/127	0.999996	0.999996	0.109995	4.60842e-07	CD53;IL5;ITGAM							Dopaminergic Neurogenesis WP1498	1930-02-01	0.979938	0.999996	0.32657	0.00661818	SOX2;STAT3							Acute myeloid leukemia	21/57	0.000549977	0.00522171	2.6799	20.1143	CHUK;BAD;STAT3;ARAF;BRAF;PIK3CB;PIK3R1;IKBKB;NRAS;PIK3CA;RPS6KB1;AKT2;KIT;RPS6KB2;EIF4EBP1;AKT1;KRAS;SOS1;SOS2;MAPK3;RUNX1T1							T-Cell antigen Receptor (TCR) pathway during Staphylococcus aureus infection WP3863	17/62	0.0423074	0.168063	1.73265	5.48003	GSK3B;CHUK;CBL;MALT1;IKBKB;MAPK9;DLG1;IL5;PIK3CA;CDK4;AKT1;SOS1;MAP2K7;CALM1;MAP3K7;NCK1;MAPK3
	Spermatocytes	3/106	0.999996	0.999996	0.132592	5.51769e-07	PDHA2;ACTL7B;CAPN1							Nuclear receptors in lipid metabolism and toxicity WP431	1930-02-01	0.979938	0.999996	0.32657	0.00661818	ABCA1;ABCD3							Phosphoinositides and their downstream targets	2021-12-25	0.000552442	0.00522171	4.23598	31.7748	EEA1;LYN;GSK3B;PFKL;RPS6KB1;BAD;AKT1;AP2A1;ARHGEF2;PFKM;RAB5A;AP2M1							Mesodermal commitment pathway WP2857	35/147	0.0430022	0.168247	1.43463	4.51407	YAP1;SETD2;CTBP2;SRF;HTT;NLK;PHF6;SOX2;ELK4;PPP2CA;EPB41L5;TRIM28;TRIM5;UBR5;ASCC3;TEAD1;TEAD2;ACVR1;SMAD2;VAV3;WDHD1;SMAD4;POU5F1;PIAS1;CCDC88A;KLF5;AEBP2;PRKAR1A;MTF2;RGS10;CCDC6;TCF4;BMPR1A;NFE2L2;CUL4B
	Acinar Cells	1/124	0.999996	0.999996	0.0369448	1.53398e-07	OTC							Blood Clotting Cascade WP460	2021-01-20	0.980821	0.999996	0.240696	0.00466118	SERPINE1							Glucose metabolism	22/61	0.000576359	0.00541071	2.5918	19.3317	SLC25A1;GPI;PYGB;TPI1;AGL;PHKB;ENO1;PHKA2;PPP2CA;GYS1;PFKL;UGP2;PPP2R1B;PPP2R1A;PGK1;ALDOC;SLC25A10;CALM1;SLC25A11;PFKM;PGM1;SLC25A13							Mitochondrial fatty acid synthesis pathway WP4317	2021-03-05	0.0432301	0.168247	6.87078	21.5826	MECR;HSD17B12;MCAT
	Stromal Cells	1/124	0.999996	0.999996	0.0369448	1.53398e-07	KIT							Neural Crest Differentiation WP2074	11/101	0.98135	0.999996	0.558085	0.0105063	ITGB1;GSK3B;HDAC2;HDAC3;CTBP2;ID1;TCF4;RBPJ;FGF2;HDAC6;RHOB							BRCA1, BRCA2 and ATR roles in cancer susceptibility	2021-11-22	0.000607657	0.00566599	4.58825	33.9801	RAD50;RAD51;CHEK1;FANCA;HUS1;RAD17;ATM;BRCA1;NBN;FANCG;ATR							TCA Cycle Nutrient Utilization and Invasiveness of Ovarian Cancer WP2868	2021-03-05	0.0432301	0.168247	6.87078	21.5826	STAT3;JAK1;MAPK3
	Neuroendocrine Cells	3/123	0.999996	0.999996	0.11369	4.71937e-07	GRIA2;CA10;CLASP2							GPCRs, Class B Secretin-like WP456	2021-01-22	0.987087	0.999996	0.217746	0.00283007	GHRHR							E-cadherin nascent AJ-like junctions pathway	16/39	0.000631003	0.00577985	3.19396	23.5337	NCKAP1;CTNND1;IQGAP1;PIK3R1;MLLT4;KLHL20;CDC42;ENAH;TIAM1;DLG1;RAP1A;PIK3CA;ABI1;CTNNA1;AKT1;CRK							Histone Modifications WP2369	18/67	0.0450476	0.174144	1.68487	5.22317	KMT2E;SUV39H2;SETD2;SETD3;KMT2A;SETDB1;SMYD5;EHMT2;KMT2C;SETDB2;HIST1H3A;AEBP2;NSD1;HIST1H4H;HIST1H4I;HIST1H4C;HIST1H3C;EZH2
	Ionocytes	3/107	0.999996	0.999996	0.131309	5.43283e-07	SLC12A2;ATP1B1;EXPH5							Metapathway biotransformation WP1251	16/141	0.988127	0.999996	0.584031	0.00697552	NAA50;GSTM4;NAA30;HS3ST3A1;CHST7;GPX1;GPX4;GSTO1;GSTCD;MGST3;GSS;MGST1;AKR1A1;HS2ST1;GSTZ1;NDST1							Signaling by Robo receptor	14/32	0.00063192	0.00577985	3.57011	26.3001	VASP;ROBO1;CDC42;ENAH;ABL2;SLIT2;SOS1;PAK2;SOS2;CLASP1;CLASP2;NCK1;PAK4;PFN2							Target Of Rapamycin (TOR) Signaling WP1471	1936-11-01	0.045739	0.175638	2.01711	6.22238	CDC42;IDI1;PRKAA1;RPS6KB1;RHEB;EIF4EBP1;MLST8;ULK3;AKT1;PRR5L;HMGCR
	Osteoclast Precursor Cells	3/107	0.999996	0.999996	0.131309	5.43283e-07	SP100;ITGAM;TRIM38							Complement and Coagulation Cascades WP449	1962-05-01	0.99161	0.999996	0.400677	0.00337575	CR2;SERPINE1;TFPI;KLKB1;CD55							Translation factors	19/50	0.000638814	0.00577985	2.81502	20.707	EIF5B;EIF2B4;EIF1AX;EIF2AK3;EIF2S2;EIF5;EIF6;EEF1D;EIF4EBP1;EIF3G;EIF3H;ETF1;EIF3E;EIF3F;EIF4E;EIF3D;EIF4G3;EIF3A;EIF3B							RalA downstream regulated genes WP2290	2021-05-12	0.0481563	0.183696	3.27263	9.92688	CDC42;NRAS;RALBP1;EXOC8;KRAS
	Goblet Cells	1/122	0.999996	0.999996	0.0375601	1.55121e-07	EPCAM							Cytokines and Inflammatory Response WP222	2021-01-27	0.995197	0.999996	0.175818	0.000846497	IL5							N-glycan precursor substrate biosynthesis	2021-09-16	0.000640809	0.00577985	5.89732	43.3617	DPM1;GMPPB;DPM3;DOLPP1;GFPT1;MPI;GMPPA;PGM3;GNPNAT1							SREBF and miR33 in cholesterol and lipid homeostasis WP2011	2021-06-16	0.0517992	0.196292	2.74927	8.1389	ABCA1;PRKAA1;SCD;HMGCR;SIRT1;MED15
	Enterochromaffin Cells	3/109	0.999996	0.999996	0.128816	5.28947e-07	SEMA5A;TRPA1;OTC							Retinol metabolism WP1259	1939-02-01	0.995739	0.999996	0.246999	0.00105468	RXRB;RBP1							PI3K subunit p85 role in regulation of actin organization and cell migration	2021-09-16	0.000640809	0.00577985	5.89732	43.3617	ACTR3;CDC42;ACTR2;PIK3CA;ARPC3;ARPC1B;ARPC4;PIK3R1;WASL							IL-1 signaling pathway WP195	15/55	0.0565845	0.211956	1.71948	4.93837	MAP3K2;MAP3K1;CHUK;PTPN11;IRAK4;PIK3R1;ECSIT;IKBKB;MAPK9;AKT1;TAB3;TAB2;MAP2K7;MAP3K7;MAPK3
	Dopaminergic Neurons	1/119	0.999996	0.999996	0.0385221	1.5779e-07	GRIA2							Matrix Metalloproteinases WP441	2021-01-29	0.996766	0.999996	0.16324	0.000528767	BSG							Lipid and lipoprotein metabolism	116/489	0.000652027	0.00584284	1.43764	10.5457	PI4K2B;LPGAT1;PITPNB;CCNC;LCLAT1;PPP1CB;PPP1CC;COL4A3BP;SCP2;MED1;ACOT8;SACM1L;MED9;ACSL3;MED7;GNPAT;TBL1XR1;GPD2;FAR1;TRIB3;CSNK1G2;SLC27A5;IDI1;MTMR2;SAR1B;NRF1;PIK3R1;MTMR6;MTM1;PTDSS2;PMVK;SLCO1B3;ARSK;INPP5K;KDSR;FDFT1;ABCA1;FDPS;CREBBP;IDH1;EPT1;MED13L;AMACR;PEMT;DHCR7;PI4KB;SLC25A1;ACADVL;CHD9;HEXB;MTMR14;HEXA;AKR1B1;PIK3CB;MED16;PIK3C2A;TAZ;MED15;MED11;MED13;SMPD4;SPTLC1;SIN3A;ACADM;TEAD1…							Fragile X Syndrome WP4549	29/121	0.0566689	0.211956	1.44644	4.15204	APP;GRIA2;ABCD3;FMR1;CLTC;ARAF;CLTB;AP2A1;PIK3CB;MLST8;AP2S1;AKT1;EIF4E;AP2M1;DUSP3;SLC16A1;HOMER1;BRAF;PTPN11;DNM2;PPP1CA;ALDH3A2;CREB1;RPS6KB1;PRKAR1A;RHEB;MAP1B;KRAS;SOS1
	Thymocytes	2/118	0.999996	0.999996	0.078404	3.20395e-07	CD53;UCP2							Prostaglandin Synthesis and Regulation WP374	2021-01-31	0.997822	0.999996	0.152338	0.000332106	ANXA6							Integration of provirus	2021-06-08	0.000664829	0.00588118	13.7531	100.617	XRCC4;XRCC5;HMGA1;LIG4;PSIP1;BANF1							Host-pathogen interaction of human coronaviruses - interferon induction WP4880	1933-10-01	0.0583214	0.21673	1.99288	5.66333	IKBKB;IFNAR2;MAVS;TBK1;CHUK;STAT1;MAP3K7;IRF9;JAK1;IFNAR1
	Intercalated Cells	1/118	0.999996	0.999996	0.0388537	1.58704e-07	EXPH5							Monoamine GPCRs WP570	1933-01-01	0.998533	0.999996	0.1428	0.000209588	DRD1							Recruitment of repair and signaling proteins to double-strand breaks	2021-06-08	0.000664829	0.00588118	13.7531	100.617	RAD50;H2AFX;ATM;BRCA1;NBN;TP53BP1							Novel intracellular components of RIG-I-like receptor (RLR) pathway WP3865	16/60	0.0600415	0.2214	1.66743	4.69002	DDX3X;MAP3K1;CHUK;TANK;IKBKB;MAPK10;MAPK9;SIKE1;MAVS;TBK1;RNF125;SNW1;PIN1;FADD;MAP3K7;ATG5
	Natural Killer T Cells	1/118	0.999996	0.999996	0.0388537	1.58704e-07	CD53							Oxidation by Cytochrome P450 WP1274	1940-01-01	0.999631	0.999996	0.117119	4.32127e-05	CYB5R4							Glycogen metabolism	15/36	0.000763119	0.00670767	3.27899	23.5369	GSK3B;PYGB;AGL;PHKB;PPP2R5C;PHKA2;PPP2CA;GYS1;UGP2;PPP2R1B;PPP2R4;PPP2R1A;PPP2R5E;CALM1;PGM1							ATR Signaling WP3875	2021-04-09	0.0607312	0.2214	3.66477	10.2661	CHEK1;HUS1;TOPBP1;ATR
	T Regulatory Cells	1/117	0.999996	0.999996	0.0391911	1.59632e-07	CD53							Striated Muscle Contraction WP216	1945-01-01	0.999861	0.999996	0.103778	1.4415e-05	TPM2							MHC class II antigen presentation	32/103	0.000826805	0.00722146	2.07255	14.7109	DYNC1I2;SEC23A;DCTN2;SAR1B;DCTN4;CLTC;DCTN3;AP2A1;KIF11;KIF15;KLC3;ACTR1A;ACTR1B;AP1G1;KIF5B;AP2S1;AP1S1;CTSF;KIFAP3;CTSD;RILP;AP2M1;DYNC1H1;SEC24A;AP1B1;KIF23;KIF22;DNM2;CENPE;DYNC1LI2;CANX;SEC24D							Urea cycle and related diseases WP4571	2021-04-09	0.0607312	0.2214	3.66477	10.2661	CPS1;ASL;SLC25A13;OTC
	Foveolar Cells	2/114	0.999996	0.999996	0.0812241	3.28304e-07	ATP8B1;PTGR1							Non-odorant GPCRs WP1396	4/267	0.999995	0.999996	0.0685769	3.61024e-07	GHRHR;CNR2;ACKR3;DRD1							Proteasome degradation	22/63	0.000951919	0.00826194	2.46507	17.1496	PSMD10;PSMD12;PSMD11;RPN2;H2AFX;UBE2D1;UCHL3;PSMB10;PSMD8;PSMB6;PSMD9;PSMB7;PSMD6;PSMA3;PSMA4;PSMC6;PSMA1;PSMC1;PSMC2;PSME1;PSMD1;UBA1							Hypothesized Pathways in Pathogenesis of Cardiovascular Disease WP3668	2021-08-25	0.0646938	0.231451	2.15658	5.9049	SMAD2;SMAD4;SERPINE1;FLNA;NR2C2;TGFBR1;RUNX2;MAPK3
	Clara Cells	2/113	0.999996	0.999996	0.0819609	3.3038e-07	TACSTD2;SCGB3A2							GPCRs, Class A Rhodopsin-like WP189	2/228	0.999995	0.999996	0.0399712	2.0086e-07	CNR2;ACKR3							SLBP-dependent processing of replication-dependent histone pre-mRNAs	2021-07-11	0.000993049	0.00851185	8.02389	55.483	LSM10;NCBP1;NCBP2;SNRPG;SNRPE;SNRPD3;SNRPB							IL-7 signaling pathway WP205	2021-08-25	0.0646938	0.231451	2.15658	5.9049	GSK3B;STAT1;BAD;STAT3;AKT1;PIK3R1;JAK1;MAPK3
	Myeloid-derived Suppressor Cells	2/112	0.999996	0.999996	0.082711	3.325e-07	CD53;ITGAM							Odorant GPCRs WP1397	5/189	0.999995	0.999996	0.123159	5.84713e-07	GPR176;TPRA1;GPR180;GPR75;GPR137B							Valine, leucine and isoleucine biosynthesis	2021-07-11	0.000993049	0.00851185	8.02389	55.483	PDHA2;PDHA1;VARS;LARS;IARS2;BCAT1;BCAT2							Signal Transduction of S1P Receptor WP26	2021-08-25	0.0646938	0.231451	2.15658	5.9049	ASAH1;SPHK2;AKT2;SPHK1;GNAI3;AKT1;MAPK6;MAPK3
	Pancreatic Stellate Cells	2/111	0.999996	0.999996	0.083475	3.34672e-07	GJA1;CALD1							GPCRs, Other WP41	1/155	0.999996	0.999996	0.0294517	1.3143e-07	DRD1							Endocytosis	54/201	0.00103926	0.00885296	1.69186	11.6218	TFRC;ZFYVE9;CLTC;CLTB;AP2A1;ARRB1;EEA1;CHMP1B;VPS36;GIT1;AP2M1;SH3GLB2;PRKCI;PDCD6IP;VPS37A;ARAP1;VPS37B;ARFGAP3;TGFBR1;RNF41;ARFGAP2;DNM2;RUFY1;ACAP2;ZFYVE16;RAB31;RABEP1;KIT;CHMP6;VPS25;STAM2;VPS28;TSG101;VPS4B;VPS4A;ASAP3;ASAP2;CBL;CDC42;RAB11FIP1;ADRBK1;GRK6;AP2S1;RAB11FIP2;EPS15;SMAD2;VTA1;WWP1;SNF8;RAB11B;ITCH;CHMP2B;VPS45;RAB5A							Development of pulmonary dendritic cells and macrophage subsets WP3892	2021-05-13	0.0670241	0.234167	2.86338	7.73885	BATF3;ID2;STAT3;TCF4;RUNX2
	Follicular Cells	2/110	0.999996	0.999996	0.0842531	3.36891e-07	SPATA6L;TTF1																				ATM pathway	18/48	0.00105421	0.00892519	2.75516	18.8865	BLM;CDKN1A;XRCC4;H2AFX;RNF8;BRCA1;SMC3;SMC1A;CDC25A;RAD50;RAD51;TRIM28;CHEK1;RAD17;ATM;NBN;TP53BP1;ATR							Genes targeted by miRNAs in adipocytes WP1992	2021-05-13	0.0670241	0.234167	2.86338	7.73885	KCNE1;GJA1;SRF;PTBP2;HCN2
	Nuocytes	1/110	0.999996	0.999996	0.0417258	1.665e-07	IL5																				Golgi-associated vesicle biogenesis	2021-10-20	0.00108026	0.00908997	4.58725	31.3335	NAPA;BLOC1S6;AP1G1;BLOC1S1;CLTC;AP1B1;ARRB1;CLINT1;DNM2;SH3D19							Homologous recombination WP186	2021-05-13	0.0670241	0.234167	2.86338	7.73885	RAD50;RAD51;POLD2;ATM;NBN
	Red Pulp Macrophages	1/110	0.999996	0.999996	0.0417258	1.665e-07	ITGAM																				Biosynthesis of the N-glycan precursor (dolichol lipid-linked oligosaccharide, LLO) and transfer to a nascent protein	13/30	0.00109619	0.00916814	3.50934	23.9194	ALG6;MPI;GFPT1;ALG13;ALG3;ALG10;GMPPB;DPM1;DPM3;DOLPP1;GMPPA;PGM3;GNPNAT1							Urea cycle and metabolism of amino groups WP497	2021-07-21	0.0671191	0.234167	2.29114	6.18903	GAMT;GATM;CPS1;PYCR1;ASL;CKB;OTC
	T Follicular Helper Cells	1/110	0.999996	0.999996	0.0417258	1.665e-07	CD53																				Signaling events mediated by stem cell factor receptor (c-Kit)	19/52	0.00111543	0.00927285	2.64409	17.9759	LYN;GSK3B;CREBBP;BAD;STAT1;STAT3;PTPN11;PIK3R1;CBL;CRKL;SPRED1;FER;PIK3CA;RPS6KB1;KIT;AKT1;SOS1;SH2B3;MAPK3							Airway smooth muscle cell contraction WP4962	2021-06-17	0.0682987	0.234167	2.49919	6.70748	PPP1CB;PPP1R14A;ROCK1;ROCK2;GNAQ;CALM1
	Pinealocytes	2/107	0.999996	0.999996	0.0866762	3.43945e-07	SV2C;PMEPA1																				Viral messenger RNA biosynthesis	2021-08-14	0.00113471	0.00929963	6.1144	41.4641	POLR2B;POLR2C;POLR2D;POLR2E;POLR2G;POLR2I;GTF2F2;POLR2L							IL-9 signaling pathway WP22	2021-06-17	0.0682987	0.234167	2.49919	6.70748	CDK9;STAT1;STAT3;PIK3R1;MAPK3;JAK1
	Adrenergic Neurons	2/106	0.999996	0.999996	0.087515	3.46452e-07	MYCN;CACFD1																				Beta-catenin phosphorylation cascade	2021-09-17	0.00114561	0.00929963	5.15984	34.9415	PPP2CA;GSK3B;FRAT2;APC;PPP2R1B;CSNK1A1;PPP2R1A;PPP2R5E;PPP2R5C							Pyrimidine metabolism and related diseases WP4225	2021-06-17	0.0682987	0.234167	2.49919	6.70748	NT5C3A;NT5C;RRM1;CPS1;RRM2B;OTC
	Salivary Mucous Cells	2/105	0.999996	0.999996	0.0883701	3.49064e-07	CNN1;TACSTD2																				Branched-chain amino acid catabolism	2021-09-17	0.00114561	0.00929963	5.15984	34.9415	BCKDHA;MCCC1;DBT;BCAT1;ACADSB;HSD17B10;DLD;HIBCH;BCAT2							CAMKK2 Pathway WP4874	1934-10-01	0.0698525	0.238077	1.90972	5.08248	FIS1;CREB1;WFS1;SMC1A;CALM1;SIRT1;GIT1;CAMKK2;MAPK3;NFE2L2
	Noradrenergic Neurons	2/104	0.999996	0.999996	0.0892419	3.51789e-07	PRAP1;OTC																				SUMOylation by RanBP2 regulates transcriptional repression	2021-09-17	0.00114561	0.00929963	5.15984	34.9415	RANBP2;UBE2I;XPO1;SUMO1;NUP153;RANGAP1;HDAC6;PIAS2;PIAS1							Sphingolipid pathway WP1422	2021-09-30	0.0745978	0.249994	1.9641	5.09809	PPP2CA;ASAH1;COL4A3BP;SPTLC1;SPHK2;SPHK1;SERINC1;KDSR;PPP1CA
	Serotonergic Neurons	2/104	0.999996	0.999996	0.0892419	3.51789e-07	TFPI;OTC																				Neurotrophic factor-mediated Trk receptor signaling	21/60	0.00119074	0.00960952	2.4733	16.6532	PRKCI;MAGED1;STAT3;RHOG;PTPN11;PIK3R1;CRKL;CDC42;TIAM1;NRAS;RAP1A;PIK3CA;RASA1;DNAJA3;GIPC1;ELMO1;KRAS;SOS1;CRK;DOCK1;MAPK3							Fluoroacetic acid toxicity WP4966	2021-03-06	0.075085	0.249994	4.58024	11.8589	ALDH3A2;ACSS2;ALDH2
	Cholinergic Neurons	2/102	0.999996	0.999996	0.0910379	3.57637e-07	BRCA1;RCOR2																				RNA polymerase III transcription initiation from type 2 promoter	2021-12-27	0.00129658	0.0103023	3.67073	24.4031	GTF3C3;GTF3C5;BRF1;POLR3B;POLR3D;POLR1C;POLR2E;POLR1D;POLR3G;POLR3H;POLR3K;POLR2L							Metastatic brain tumor WP2249	2021-03-06	0.075085	0.249994	4.58024	11.8589	CDC42;CDK6;PIK3R1
	Ciliated Cells	1/104	0.999996	0.999996	0.0441727	1.72995e-07	TUBB4B																				Developmental biology	100/420	0.00129999	0.0103023	1.44274	9.58755	SEMA5A;CCNC;RBPJ;CCND3;AKT2;DPYSL2;DPYSL3;RPS6KA1;AKT1;AP2M1;MEF2A;MED1;UNC5B;EBF1;MED9;MED7;MYL6;TBL1XR1;PFN2;SDCBP;ABL2;MYH10;PLXNA4;SPTBN1;VASP;SMAD2;PRNP;CREBBP;SMAD4;CNTN6;RDX;MAFA;PTK2;MED13L;DRAP1;DLG1;CDK4;CDK1;TCF4;CD24;TDGF1;ITGB1;GSK3B;CHD9;CLTC;AP2A1;WASL;LAMC1;MED16;MED15;ROBO1;MED11;MED13;CHL1;NCK1;NCOA1;HSP90AA1;NCOA6;DCC;NCOA3;TCF12;RHOG;MED27;RHOC;MED29;RHOB;DNM2;MED23;ENAH;NCOR1…							Pilocytic astrocytoma WP2253	2021-03-06	0.075085	0.249994	4.58024	11.8589	BRAF;PTPN11;SOS1
	Airway Epithelial Cells	1/103	0.999996	0.999996	0.0446085	1.74139e-07	EXPH5																				Fructose and mannose metabolism	14/34	0.00130534	0.0103023	3.21271	21.3365	TSTA3;MTMR2;TPI1;MPI;AKR1B1;MTMR6;HK1;GMPPB;PFKL;FPGT;GMPPA;ALDOC;PHPT1;PFKM							Chemokine signaling pathway WP3929	37/164	0.0763925	0.252885	1.33701	3.4386	GSK3B;ROCK1;ROCK2;GNAI3;ARRB1;PIK3R1;PIK3CB;WASL;CRKL;IKBKB;CDC42;GNG10;NRAS;RAP1A;AKT2;GRK6;AKT1;CSK;MAPK3;LYN;VAV3;CHUK;STAT1;STAT3;BRAF;PTK2;TIAM1;PIK3CA;GNB2;ELMO1;GNB4;KRAS;SOS1;DOCK2;SOS2;CRK;BCAR1
	T Cells Naive	1/102	0.999996	0.999996	0.045053	1.75303e-07	CD53																				Interleukin-2 signaling pathway	186/847	0.00130645	0.0103023	1.30375	8.6575	APP;GALNT11;SERPINE1;SMC5;SMC4;ACTB;CRKL;GLS;GNPTAB;NAMPT;SACS;AKT1;BCAP29;GTF2I;PPP1R16B;PDIA3;CISH;CASK;SLC30A1;ZNF12;ATP1B1;PIAS2;RUFY1;RNF125;RAB31;MYCN;TMX1;HIST1H2BG;IL6ST;TRIB2;STAM2;CSNK1G2;ATF4;LY6E;HIST1H2BC;GRIA2;IDI1;BLM;CBFB;KMT2C;YTHDC2;MGST1;ITPR2;TARS;TNFRSF11B;PIK3R1;PLAC8;SNX4;GNG10;INPP5F;ATXN7;MAN2A1;HLTF;BAG1;CLSPN;NDUFV2;ZNF267;SOCS4;S100A11;LYN;YARS;TRAP1;TIA1;YES1;NOP16;NF…							p53 transcriptional gene network WP4963	17/67	0.0802858	0.264255	1.55891	3.93183	CDKN1A;GPX1;XRCC5;SERPINE1;SLC7A11;SAT1;TP53I3;TRAF4;RRM2B;MSH2;ZMAT3;PERP;TP53INP1;CCNG1;BAX;POLK;IRF9
																											NGF signaling via TRKA from the plasma membrane	39/136	0.00135559	0.010629	1.84958	12.2137	ATF1;GSK3B;CDKN1A;CLTC;ITPR2;AP2A1;PIK3R1;PIK3CB;PPP2CA;NRAS;RAP1A;PPP2R1B;PPP2R1A;AKT2;ADRBK1;RPS6KA1;MLST8;AP2S1;AKT1;AP2M1;MAPK3;MEF2A;DUSP3;CHUK;BAD;KIDINS220;STAT3;BRAF;DNM2;CREB1;PIK3CA;PRKAR1A;RPS6KB2;CDK1;TRIB3;KRAS;CALM1;SOS1;CRK							Small cell lung cancer WP4658	23/96	0.0826991	0.26921	1.445	3.60173	ITGB1;CDKN1A;CHUK;LAMB1;LAMC1;PIK3CB;PIK3R1;PTK2;CKS1B;IKBKB;RXRB;CDK6;TRAF4;PIK3CA;CDK4;CASP3;AKT2;CKS2;E2F1;AKT1;BAX;POLK;BAK1
																											Transcriptional regulation of white adipocyte differentiation	25/77	0.00147864	0.0115284	2.20903	14.3954	HDAC3;CHD9;CCNC;MED16;MED15;MED11;CCND3;MED13;TGS1;NCOA1;MED1;CREBBP;NCOA6;NCOA3;EBF1;MED9;MED27;MED29;MED7;MED13L;MED23;NCOR1;KLF5;TBL1XR1;CDK4							Overview of leukocyte-intrinsic Hippo pathway functions WP4542	1935-10-01	0.0827261	0.26921	1.83322	4.56879	YAP1;TEAD4;MOB1A;RAP1A;PRDM1;TAZ;TEAD1;TEAD2;STK3;SAV1
																											Cholesterol biosynthesis	2021-11-24	0.00151332	0.0116669	3.88189	25.2069	FDPS;IDI1;MVK;GGPS1;CYP51A1;PMVK;SC5D;MVD;HMGCR;DHCR7;FDFT1							Gamma-glutamyl cycle for the biosynthesis and degradation of glutathione, including diseases WP4518	2021-04-10	0.0872503	0.273868	3.05379	7.44811	GGCT;GCLC;GSS;GGT1
																											Proteasome complex	2021-11-24	0.00151332	0.0116669	3.88189	25.2069	PSMB6;PSMB7;PSMD12;PSMA3;PSMD11;PSMA4;PSMD14;RPN2;PSMA1;UBE3A;UBA1							Mammary gland development pathway - Involution (Stage 4 of 4) WP2815	2021-04-10	0.0872503	0.273868	3.05379	7.44811	STAT3;E2F1;BAX;IL6ST
																											DNA strand elongation	13/31	0.00158085	0.0121057	3.31418	21.3758	GINS2;FEN1;RFC3;PCNA;MCM7;RFC1;MCM8;RFC2;POLA1;POLD2;MCM4;MCM5;MCM2							Trans-sulfuration pathway WP2333	2021-04-10	0.0872503	0.273868	3.05379	7.44811	AHCY;MTR;MAT2B;GCLM
																											Epidermal growth factor receptor (EGFR) pathway	33/111	0.00159408	0.0121057	1.94523	12.5301	GRB7;PIK3R1;WASL;CBL;ACTB;MAPK9;NRAS;RPS6KC1;AKT2;RPS6KA1;ERBB2;AKT1;MAP2K7;MAPK6;NCK1;MAPK3;VAV3;PRKCI;BAD;RHOG;RHOF;RHOC;RHOB;MAPK10;CREB1;SOAT1;PIK3CA;RPS6KB1;RPS6KB2;KRAS;SOS1;SOS2;RHOQ							Structural Pathway of Interleukin 1 (IL-1) WP2637	13/49	0.0873614	0.273868	1.65527	4.03505	MAP3K1;CHUK;IRAK4;TANK;IKBKB;MAPK10;MAPK9;TAB3;TAB2;MAP2K7;MAP3K7;EIF4E;MAPK3
																											Fc gamma receptor-mediated phagocytosis	29/94	0.00159655	0.0121057	2.05065	13.206	ARPC1B;ARPC5L;ASAP3;PIK3CB;WASL;ASAP2;PIK3R1;CRKL;CDC42;AKT2;CFL2;AKT1;MAPK3;VAV3;LYN;VASP;SYK;MYO10;SPHK2;SPHK1;LIMK1;ARPC4;DNM2;PIK3CA;RPS6KB1;ARPC3;RPS6KB2;DOCK2;CRK							4-hydroxytamoxifen, Dexamethasone, and Retinoic Acids Regulation of p27 Expression WP3879	2021-06-18	0.0874855	0.273868	2.29078	5.58099	PRKAA1;PBK;EIF4EBP1;AKT1;EIF4E;MAPK3
																											Polo-like kinase 1 (PLK1) pathway	17/46	0.00173345	0.0130719	2.69123	17.1099	RAB1A;CENPU;ERCC6L;PPP1R12A;ROCK2;NDC80;PPP1CB;PPP2CA;CENPE;FZR1;SGOL1;PPP2R1A;GORASP1;CDK1;CLSPN;ECT2;SPC24							TCA Cycle (aka Krebs or citric acid cycle) WP78	2021-06-18	0.0874855	0.273868	2.29078	5.58099	SUCLA2;IDH3B;SUCLG2;SUCLG1;SDHD;DLD
																											Base excision repair	14/35	0.0018204	0.013653	3.05954	19.3017	MBD4;FEN1;PCNA;MPG;LIG3;HMGB1;UNG;POLE4;SMUG1;NEIL3;APEX1;POLE2;POLD2;POLE							TGF-B Signaling in Thyroid Cells for Epithelial-Mesenchymal Transition WP3859	2021-06-18	0.0874855	0.273868	2.29078	5.58099	SMAD2;SMAD4;ID1;AKT1;RUNX2;MAPK3
																											Non-small cell lung cancer	19/54	0.00186654	0.0139234	2.4927	15.6633	BAD;ARAF;BRAF;PIK3CB;PIK3R1;STK4;RXRB;NRAS;CDK6;PIK3CA;CDK4;AKT2;ERBB2;E2F1;AKT1;KRAS;SOS1;SOS2;MAPK3							Trans-sulfuration and one-carbon metabolism WP2525	1931-09-01	0.0890948	0.275355	1.8747	4.53314	GCLC;AHCY;AHCYL1;MTHFD1L;GSS;MTR;PHGDH;MAT2B;GCLM
																											Renal cell carcinoma	23/70	0.00188183	0.013962	2.24793	14.1069	EGLN1;CREBBP;ARAF;BRAF;PTPN11;PIK3CB;PIK3R1;HIF1A;CRKL;CDC42;NRAS;RAP1A;PIK3CA;AKT2;AKT1;TCEB2;KRAS;SOS1;CRK;SOS2;PAK2;MAPK3;PAK4							Tumor suppressor activity of SMARCB1 WP4204	1931-09-01	0.0890948	0.275355	1.8747	4.53314	SUZ12;SMARCD1;SMARCD2;SMARCB1;CDK6;RBBP4;CDK4;ARID1B;EZH2
																											Thyroid-stimulating hormone signaling pathway	22/66	0.00190146	0.0139624	2.29658	14.3884	STAT1;PDE4D;STAT3;GNAI3;SCRIB;BRAF;PIK3R1;TTF1;GNA13;CCND3;CREB1;RAP1A;PIK3CA;RPS6KB1;CDK4;APEX1;GNAQ;RPS6KA1;E2F1;AKT1;JAK1;MAPK3							Cancer immunotherapy by CTLA4 blockade WP4582	2021-05-14	0.0893948	0.275355	2.54507	6.14556	PPP2CA;PIK3CA;PTPN11;PIK3R1;PIK3CB
																											RNA polymerase III transcription initiation From type 3 promoter	2021-12-28	0.00190213	0.0139624	3.4411	21.5578	SNAPC5;ZNF143;POLR3B;SNAPC3;POLR3D;POLR1C;POLR2E;POLR1D;POLR3G;POLR3H;POLR3K;POLR2L							B Cell Receptor Signaling Pathway WP23	23/97	0.0907721	0.27811	1.42539	3.42007	LYN;GSK3B;CR2;CHUK;SYK;NFATC3;BRAF;PTPN11;PIK3R1;CBL;MALT1;CRKL;IKBKB;CDC42;MAPK9;CREB1;RPS6KA1;AKT1;SOS1;MAP3K7;CRK;GTF2I;NCK1
																											CBL signaling regulation	2021-09-18	0.00192844	0.0140065	4.58625	28.6688	LYN;YES1;SYK;PIK3CA;PIK3CB;PIK3R1;CBL;CRK;CRKL							Genes related to primary cilium development (based on CRISPR) WP4536	24/103	0.100137	0.304009	1.39319	3.20602	TTC26;MKKS;ARL3;CEP120;FUZ;TXNDC15;MIB1;ICK;ARL13B;TTC21B;TMEM216;RAB23;SASS6;TRAPPC11;FGFR1OP;FOPNL;CEP192;BBS7;KIFAP3;IFT57;PIBF1;BBS5;CLUAP1;CEP44
																											Tie2 signaling	2021-09-18	0.00192844	0.0140065	4.58625	28.6688	GRB7;NRAS;ANGPT1;PIK3CA;PTPN11;KRAS;PIK3CB;PIK3R1;SOS1							AMP-activated protein kinase (AMPK) signaling WP1403	17/69	0.100281	0.304009	1.49877	3.44685	CDKN1A;PRKAA1;CAB39;STRADA;PIK3CB;PIK3R1;HMGCR;ADIPOR2;CAMKK2;CCNA2;GYS1;PIK3CA;RPS6KB1;AKT2;RPS6KB2;EIF4EBP1;AKT1
																											G13 signaling pathway	15/39	0.00201318	0.0144796	2.86859	17.8084	ROCK1;ROCK2;LIMK1;IQGAP1;PIK3CB;WASL;CDC42;GNA13;PPP1CB;MAPK10;PIK3CA;RPS6KB1;CFL2;CALM1;MAP3K4							Estrogen signaling pathway WP712	2021-07-23	0.102612	0.307836	2.00451	4.56386	IKBKB;MAPK9;CREB1;CHUK;PIK3CA;AKT1;BRAF
																											Salmonella infection	2021-07-12	0.00201456	0.0144796	6.41872	39.8433	ACTR3;CDC42;ACTR2;ARPC3;ARPC1B;ARPC4;WASL							Glutathione metabolism WP100	2021-07-23	0.102612	0.307836	2.00451	4.56386	GCLC;GPX1;GPX4;IDH1;GSS;GGT1;GCLM
																											Association of licensing factors with the pre-replicative complex	2021-08-15	0.00205052	0.0145862	5.2406	32.4375	CDT1;ORC4;ORC3;GMNN;ORC2;E2F1;RPS27A;UBA52							Oncostatin M Signaling Pathway WP2374	16/65	0.109166	0.325802	1.49683	3.3153	STAT1;SERPINE1;STAT3;PTPN11;PIK3R1;HIF1A;MAPK9;CREB1;CASP3;AKT1;KRAS;IL6ST;SOS1;JUNB;JAK1;MAPK3
																											Cyclin A/B1-associated events during G2/M transition	2021-08-15	0.00205052	0.0145862	5.2406	32.4375	CCNA2;CDK7;XPO1;CCNH;CDK1;PKMYT1;MNAT1;CDC25A							Effect of progerin on genes involved in Hutchinson-Gilford progeria syndrome WP4320	1937-10-01	0.112522	0.330677	1.69722	3.70776	MBD3;HDAC2;HIST1H3A;RBBP4;CBX3;MBD2;E2F1;INPP5K;MTA2;HIST1H3C
																											FSH regulation of apoptosis	66/263	0.00213454	0.015106	1.5435	9.49174	USPL1;ITGB5;CTNND1;ARHGAP1;ATP2A2;ILK;ACTB;AKAP12;PPP1CB;PPP2R1A;ARL6IP5;PSMD1;TLK1;TK1;UPP1;MAP3K7;RAB2A;ACTR2;DUSP3;CEP135;CHUK;IGFBP3;TPM2;PAWR;PPP2R5C;ALG10;RANGAP1;PHKA2;RAB33B;RHOB;ALDH3A2;PTP4A1;RAB31;PRKAR1A;PPIH;BECN1;RAB1A;SMARCD1;PDXK;TNFRSF11B;NLK;PGRMC1;HSD17B1;BAG1;PGK1;FLNC;MAPK6;CD55;GK;ANGPT1;CSNK1A1;KIDINS220;STAT1;BAD;IDH1;MBD2;TFPI2;ARPC4;ATP2B1;KRT18;RAB14;CAPZA1;RAD17;DHCR7;…							Factors and pathways affecting insulin-like growth factor (IGF1)-Akt signaling WP3850	1937-10-01	0.112522	0.330677	1.69722	3.70776	ITGB1;SMAD2;GSK3B;RPS6KB1;JKAMP;MLST8;ILK;AKT1;WASL;EIF4E
																											Carbohydrate metabolism	60/235	0.00215964	0.0152056	1.57903	9.69179	B4GALT2;SLC25A1;GPI;PYGB;B4GALT3;NUP107;CHPF;NUP188;HEXB;HEXA;ENO1;HK1;HS2ST1;NDST1;GYS1;PPP2R1B;PPP2R1A;PGLS;SLC37A4;PGM1;CHST7;TPI1;PHKA2;NUP93;VCAN;B3GNT2;ALDOC;NUP54;SLC25A10;B4GALT7;SLC25A11;SLC25A13;PRPS2;PRPS1;NUP205;HS3ST3A1;GALT;RPE;AAAS;PPP2CA;UGP2;NUP85;PGK1;ST3GAL6;NUP43;GPC4;ST3GAL1;RAE1;RANBP2;NUP155;B3GAT3;AGL;NUP153;PHKB;GALE;PFKL;NUP35;CALM1;PFKM;GALK1							Neovascularisation processes WP4331	1937-10-01	0.112522	0.330677	1.69722	3.70776	SMAD2;MAPK9;ANGPT1;KIT;AKT1;SMAD9;HIF1A;SMAD5;TGFBR1;MAPK3
																											Antigen processing: cross presentation	25/79	0.00220582	0.0154519	2.12695	13.0098	PSMD10;PSMD12;PSMD11;ITGB5;PSMD14;PSMB10;PSMD8;PSMB6;PSMD9;PSMB7;PSMD6;MRC1;PSMD1;RPS27A;B2M;PDIA3;PSMA3;PSMA4;PSMC6;PSMA1;PSMC1;PSME4;PSMC2;PSME1;UBA52							Cholesterol Biosynthesis with Skeletal Dysplasias WP4804	2021-03-07	0.114305	0.33421	3.43497	7.45007	CYP51A1;SC5D;DHCR7
																											Prolactin activation of MAPK signaling	24/75	0.00226675	0.0157986	2.16177	13.1639	ITGB1;GSK3B;CISH;STAT1;STAT3;PTPN11;PIK3CB;PIK3R1;CBL;YWHAZ;PTK2;MAPK9;PIK3CA;RPS6KB1;CASP3;ERBB2;EIF4EBP1;AKT1;FLNA;SOS1;CTSD;YWHAG;JAK1;MAPK3							Cysteine and methionine catabolism WP4504	2021-05-15	0.115102	0.334842	2.29042	4.95174	GCLC;AHCY;GSS;ETHE1;MTR
																											Interleukin-6 signaling pathway	23/71	0.00231872	0.0160796	2.20097	13.3527	NCOA1;GSK3B;CREBBP;LMO4;BAD;STAT1;SRF;STAT3;PTPN11;PRDM1;PIK3R1;CBL;NLK;PIAS1;HSP90B1;PIK3CA;RPS6KB1;AKT1;IL6ST;SOS1;JUNB;JAK1;MAPK3							Methionine metabolism leading to sulfur amino acids and related disorders WP4292	2021-04-11	0.118346	0.335942	2.61737	5.58584	AHCY;ADK;MTR;MAT2B
																											GM-CSF-mediated signaling events	14/36	0.00249322	0.0172032	2.92029	17.5047	LYN;CISH;SYK;STAT1;STAT3;PTPN11;PIK3R1;YWHAZ;IKBKB;NRAS;PIK3CA;KRAS;SOS1;MAPK3							NAD metabolism, sirtuins and aging WP3630	2021-04-11	0.118346	0.335942	2.61737	5.58584	NAMPT;TFAM;HIF1A;SIRT1
																											CTLA4 inhibitory signaling	2021-10-22	0.00267062	0.0183356	3.82224	22.6485	LYN;PPP2CA;YES1;PPP2R1B;PPP2R1A;PPP2R5E;AKT2;AKT1;PTPN11;PPP2R5C							Common Pathways Underlying Drug Addiction WP2636	1942-11-01	0.118396	0.335942	1.6261	3.46965	PPP1CB;GRIA2;PPP1CC;RAP1A;CREB1;ARAF;DRD1;CALM1;ACTB;MAPK3;PPP1CA
																											IGF1 pathway	2021-12-29	0.00272102	0.0184976	3.23849	19.1289	PIK3CA;RPS6KB1;BAD;AKT1;PTPN11;PIK3R1;SOS1;YWHAZ;CRK;PTK2;BCAR1;CRKL							Metabolic reprogramming in colon cancer WP4290	1942-11-01	0.118396	0.335942	1.6261	3.46965	GPI;PFKL;PDHA1;PPAT;PGK1;PYCR1;SUCLG2;ENO1;PAICS;GART;GLS
																											Reelin signaling pathway	2021-12-29	0.00272102	0.0184976	3.23849	19.1289	ITGB1;GSK3B;RAP1A;PIK3CA;MAP1B;AKT1;PIK3R1;ARHGEF2;CBL;MAP2K7;CRKL;PAFAH1B1							TNF related weak inducer of apoptosis (TWEAK) Signaling Pathway WP2036	1942-11-01	0.118396	0.335942	1.6261	3.46965	IKBKB;GSK3B;MAPK9;CHUK;TNFRSF12A;CASP3;AKT2;AKT1;FADD;MAP3K7;MAPK3
																											Signaling by ERBB4	28/93	0.00283115	0.0191519	1.97938	11.6132	YAP1;GSK3B;CDKN1A;CUL1;PIK3R1;NRAS;AKT2;MLST8;AKT1;RPS27A;MAPK3;PSENEN;CHUK;BAD;WWP1;PTPN11;ADAM17;ITCH;CREB1;NCOR1;PIK3CA;RPS6KB2;CDK1;TRIB3;KRAS;TAB2;SOS1;UBA52							Notch Signaling Pathway Netpath WP61	15/61	0.11898	0.335944	1.49465	3.18181	PSENEN;GSK3B;CDKN1A;HDAC2;STAT3;CUL1;PIK3R1;RBPJ;HIF1A;ADAM17;ITCH;NCOR1;SNW1;AKT1;CIR1
																											Epithelial cell signaling in Helicobacter pylori infection	22/68	0.00290663	0.019494	2.19646	12.829	ATP6V1A;LYN;ATP6V0B;ATP6V1G1;ATP6V0E1;CHUK;ADAM10;PTPN11;F11R;IKBKB;CDC42;MAPK10;MAPK9;ADAM17;CASP3;ATP6V1B2;CSK;ATP6V1D;GIT1;ATP6V1C1;ATP6V1F;JAM3							Association Between Physico-Chemical Features and Toxicity Associated Pathways WP3680	16/66	0.121269	0.338775	1.4668	3.09457	ACTR3;GSK3B;ACTR2;CDKN1A;GPX1;ROCK2;CBL;PTK2;PPP2CA;DAAM1;APC;ERBB2;AKT1;SOS1;NCK1;PFN2
																											Signaling by FGFR in disease	36/128	0.00290998	0.019494	1.79912	10.5061	GSK3B;CDKN1A;ITPR2;PIK3R1;CBL;FGF2;PPP2CA;NRAS;ZMYM2;PPP2R1A;AKT2;ADRBK1;FGFR1OP2;TRIM24;MLST8;AKT1;RPS27A;MAPK3;CPSF6;CHUK;BAD;STAT1;STAT3;BRAF;PTPN11;CREB1;PIK3CA;PRKAR1A;RPS6KB2;CDK1;FGFR1OP;TRIB3;KRAS;CALM1;SOS1;UBA52							Alpha 6 Beta 4 signaling pathway WP244	1933-09-01	0.122689	0.338775	1.71827	3.60511	EIF4EBP1;AKT1;PTPN11;LAMB1;LAMC1;PIK3R1;SOS1;PTK2;MAPK3
																											Diurnally regulated genes with circadian orthologs	17/48	0.00293395	0.0195597	2.51729	14.6794	IDI1;NCKAP1;RBPMS;CBX3;NCOA4;ZFR;NR1D2;AZIN1;QKI;HERPUD1;PURA;UGP2;PSMA4;SUMO1;VAPA;KLF9;TAB2							Oxidative Stress WP408	1933-09-01	0.122689	0.338775	1.71827	3.60511	MAPK10;GCLC;GPX1;TXNRD1;CAT;MGST1;JUNB;TXN2;NFE2L2
																											Diabetes pathways	38/137	0.002955	0.0196053	1.76503	10.28	PCSK2;ACADVL;FKBP14;GOSR2;PARN;ACTB;HSP90B1;HERPUD1;EXOSC5;SERP1;KIF5B;SSR1;IGF2BP3;EXOSC2;EXOSC1;SLC30A7;SLC30A6;KLHDC3;HSPA5;EXOC8;WFS1;DIS3;EXOC7;DDX11;IGFBP3;GFPT1;EIF2AK3;MYO5A;YIF1A;DNAJC3;SPCS3;DNAJB11;EXOC3;PREB;HDGF;EXOC5;ATF4;EXOC1							Regucalcin in proximal tubule epithelial kidney cells WP4838	1933-09-01	0.122689	0.338775	1.71827	3.60511	SMAD2;SMAD4;PIK3CA;CASP3;AKT1;BAX;BRAF;BAK1;TGFBR1
																											Endometrial cancer	18/52	0.00298721	0.0197242	2.43043	14.1291	GSK3B;BAD;ARAF;ILK;BRAF;PIK3CB;PIK3R1;NRAS;PIK3CA;APC;AKT2;ERBB2;CTNNA1;AKT1;KRAS;SOS1;SOS2;MAPK3							Thymic Stromal LymphoPoietin (TSLP) Signaling Pathway WP2203	1947-12-01	0.123089	0.338775	1.57125	3.29153	LYN;MAPK9;YES1;CISH;PIK3CA;STAT1;STAT3;EIF4EBP1;AKT1;PTPN11;JAK1;MAPK3
																											Signaling by ERBB2	30/102	0.00303082	0.0198958	1.91484	11.104	GRB7;GSK3B;CDKN1A;ITPR2;PIK3R1;NRAS;AKT2;ADRBK1;ERBB2;MLST8;AKT1;RPS27A;MAPK3;HSP90AA1;YES1;CHUK;BAD;RNF41;ERBB2IP;CREB1;PIK3CA;PRKAR1A;RPS6KB2;CDK1;TRIB3;KRAS;STUB1;CALM1;SOS1;UBA52							Angiogenesis WP1539	2021-07-24	0.123512	0.338775	1.88648	3.94542	CREBBP;ANGPT1;PIK3CA;AKT1;HIF1A;FGF2;PTK2
																											E2F-mediated regulation of DNA replication	13/33	0.00308306	0.0198958	2.9824	17.2437	CDT1;PCNA;MCM8;CDC25A;PPP2CA;ORC4;POLA1;PPP2R1B;PPP2R1A;ORC3;ORC2;E2F1;CDK1							Acute viral myocarditis WP4298	20/86	0.126655	0.34575	1.38921	2.87052	GSK3B;STAT1;STAT3;ILK;PIK3R1;ACTB;PYCARD;CREB1;SGCB;CASP3;RASA1;JKAMP;AKT1;ABL2;BNIP2;BAX;SOS1;CD55;JAK1;MAPK3
																											PTEN-dependent cell cycle arrest and apoptosis	2021-09-19	0.00308529	0.0198958	4.12737	23.8608	ITGB1;PIK3CA;ILK;AKT1;PIK3R1;SOS1;PTK2;BCAR1;MAPK3							Amyotrophic lateral sclerosis (ALS) WP2447	1938-10-01	0.129411	0.351608	1.63651	3.34626	CST3;CCS;TOMM40;GPX1;ALS2;BAD;CASP3;CAT;BAX;RAB5A
																											Signaling by FGFR1 fusion mutants	2021-09-19	0.00308529	0.0198958	4.12737	23.8608	CPSF6;ZMYM2;PIK3CA;STAT1;STAT3;FGFR1OP2;TRIM24;FGFR1OP;PIK3R1							Focal Adhesion WP306	42/198	0.132854	0.359266	1.23509	2.49304	ITGB1;GSK3B;ITGB5;ROCK1;ROCK2;XIAP;ILK;PIK3R1;PIK3CB;LAMC1;ARHGAP5;ACTB;CRKL;PPP1CB;CDC42;PPP1CC;MAPK9;CCND3;RAP1A;AKT2;ERBB2;SPP1;AKT1;FLNA;FLNC;PAK2;PAK4;MAPK3;VASP;VAV3;PPP1R12A;BAD;BRAF;LAMB1;PTK2;PPP1CA;MAPK10;PIK3CA;SOS1;CRK;DOCK1;BCAR1
																											Signaling by constitutively active EGFR	2021-09-19	0.00308529	0.0198958	4.12737	23.8608	HSP90AA1;NRAS;PIK3CA;KRAS;PIK3R1;CBL;RPS27A;SOS1;UBA52							Serotonin Receptor 2 and ELK-SRF/GATA4 signaling WP732	2021-06-20	0.133585	0.359555	1.96329	3.95214	ELK4;NRAS;SRF;GNAQ;KRAS;MAPK3
																											Sprouty regulation of FGF signaling	2021-08-16	0.00346024	0.0222099	4.58524	25.9819	PPP2CA;PPP2R1A;BRAF;PTPN11;CBL;RPS27A;UBA52;MAPK3							Fatty acid beta-oxidation WP143	1934-09-01	0.14171	0.379651	1.64944	3.22296	ACADVL;ECHS1;ACSS2;TPI1;GK;GPD2;ACADM;ACSL3;DLD
																											E2F-enabled inhibition of pre-replication complex formation	2021-06-10	0.00358561	0.0229081	6.8757	38.7159	ORC4;MCM8;ORC3;ORC2;CDK1;CDC25A							MAPK pathway in congenital thyroid cancer WP4928	2021-05-16	0.143876	0.38367	2.08207	4.03673	BRAF;KRAS;SOS1;SOS2;MAPK3
																											Integrin-linked kinase signaling	16/45	0.00368278	0.0231574	2.53221	14.1907	GSK3B;PPP1R14A;HSP90AA1;PPP1R14B;PPP1R12A;RHOG;ILK;IQGAP1;CDC42;XPO1;CREB1;NACA;RUVBL2;TACC3;AKT1;LIMS1							Biomarkers for urea cycle disorders WP4583	2021-04-12	0.153441	0.407154	2.29006	4.29258	GAMT;GATM;ASL;OTC
																											RNA polymerase III transcription	16/45	0.00368278	0.0231574	2.53221	14.1907	ZNF143;GTF3C3;SSB;GTF3C5;BRF1;SNAPC5;POLR3B;SNAPC3;POLR3D;POLR1C;POLR2E;POLR1D;POLR3G;POLR3H;POLR3K;POLR2L							Hepatitis C and Hepatocellular Carcinoma WP3646	1949-12-01	0.155397	0.407154	1.48614	2.76685	CDKN1A;SMAD4;CASP3;STAT3;AKT1;PTPN11;BRCA1;SOS1;HIF1A;TGFBR1;JAK1;MAPK3
																											Progesterone-mediated oocyte maturation	26/86	0.00368813	0.0231574	1.99066	11.1529	ANAPC13;ARAF;GNAI3;PIK3CB;PIK3R1;PKMYT1;ANAPC10;ANAPC11;MAPK9;FZR1;CDC23;AKT2;CDC27;RPS6KA1;AKT1;MAPK3;HSP90AA1;BRAF;CDC25A;CCNA2;MAD2L2;MAPK10;PIK3CA;CDK1;KRAS;ANAPC1							IL-3 signaling pathway WP286	1949-12-01	0.155397	0.407154	1.48614	2.76685	LYN;SYK;BAD;STAT3;AKT1;PTPN11;PIK3R1;SOS1;CBL;CRKL;JAK1;MAPK3
																											HIV life cycle early phase	2021-07-13	0.00369177	0.0231574	5.34861	29.961	FEN1;XRCC4;XRCC5;HMGA1;LIG4;PSIP1;BANF1							Extracellular vesicle-mediated signaling in recipient cells WP2870	2021-08-30	0.15551	0.407154	1.66594	3.10039	SMAD2;NRAS;SMAD4;APC;ERBB2;AKT1;KRAS;TGFBR1
																											Leptin signaling pathway	20/61	0.00371685	0.0232093	2.23972	12.5309	NCOA1;KHDRBS1;CHUK;CISH;STAT1;STAT3;PTPN11;PIK3R1;IKBKB;CDC42;CREB1;RPS6KB1;CFL2;ERBB2;AKT1;BAX;KPNA4;SOS1;JAK1;MAPK3							Caloric restriction and aging WP4191	2021-03-08	0.159372	0.411651	2.74781	5.04639	NAMPT;AKT1;SIRT1
																											Angiopoietin receptor Tie2-mediated signaling	17/49	0.00375394	0.0232307	2.43848	13.6188	ITGB1;GRB7;CDKN1A;ANGPT1;PTPN11;PIK3R1;FGF2;PTK2;ELF1;ELF2;PIK3CA;RPS6KB1;RASA1;AKT1;CRK;NCK1;MAPK3							Hijack of ubiquitination by SARS-CoV-2 WP4860	2021-03-08	0.159372	0.411651	2.74781	5.04639	ZYG11B;CBFB;UBA3
																											Interleukin-5 signaling pathway	17/49	0.00375394	0.0232307	2.43848	13.6188	LYN;GSK3B;SYK;STAT1;STAT3;PTPN11;PIK3R1;SPRED1;IL5;RPS6KB1;RPS6KA1;RPS6KB2;AKT1;KRAS;SOS1;JAK1;MAPK3							TFs regulate miRNAs related to cardiac hypertrophy WP1559	2021-03-08	0.159372	0.411651	2.74781	5.04639	AKT2;STAT3;AKT1
																											Retinoic acid receptor-mediated signaling	2021-12-30	0.00380424	0.0234369	3.05838	17.0402	RXRB;NCOA1;CREBBP;CDK7;HDAC3;CCNH;NCOA3;RBP1;CDK1;AKT1;MNAT1;MAPK3							Oxidative Damage WP3941	1940-10-01	0.166963	0.429334	1.52722	2.73369	CDC42;MAPK10;CDKN1A;CR2;PCNA;MAP3K1;BAD;TDP2;CASP3;BAK1
																											Cyclins and cell cycle regulation	2021-10-23	0.00397347	0.0240499	3.52801	19.5032	CDKN1A;CCND3;CDK7;CDK6;RBL1;CCNH;CDK4;CDK1;E2F1;CDC25A							Hippo-Merlin Signaling Dysregulation WP4541	26/120	0.17002	0.434131	1.26799	2.24667	ITGB1;ITGAM;ITGB5;TAZ;SAV1;STK3;PPP1CB;PPP1CC;NRAS;CTNNA1;TEAD1;PAK2;TEAD2;PAK4;TEAD4;PPP1R14A;PPP1R12A;PTK2;PPP1CA;CUL4A;PRKAR1A;KIT;CDH12;KRAS;NF2;EPHA2
																											Mismatch repair	2021-10-23	0.00397347	0.0240499	3.52801	19.5032	MSH6;RFC3;PCNA;RFC1;MSH2;RFC2;EXO1;MSH3;POLD2;MLH3							EPO Receptor Signaling WP581	2021-07-26	0.17109	0.434131	1.6877	2.97974	CISH;STAT1;RASA1;STAT3;AKT1;SOS1;MAPK3
																											RNA polymerase III transcription termination	2021-10-23	0.00397347	0.0240499	3.52801	19.5032	SSB;POLR3B;POLR3D;POLR1C;POLR1D;POLR2E;POLR3G;POLR3H;POLR3K;POLR2L							Wnt/beta-catenin signaling pathway in leukemia WP3658	2021-07-26	0.17109	0.434131	1.6877	2.97974	PYGO1;GSK3B;APC;CSNK1A1;AKT1;LRP6;RUNX1T1
																											Signaling events mediated by PRL	2021-10-23	0.00397347	0.0240499	3.52801	19.5032	ITGB1;CCNA2;PTP4A1;PTP4A2;CDKN1A;ROCK1;RABGGTB;RHOC;BCAR1;MAPK3							Canonical and non-canonical TGF-B signaling WP3874	2021-05-17	0.175367	0.439179	1.90845	3.32238	SMAD2;MAPK9;SMAD4;TGFBR1;BMPR1A
																											N-cadherin signaling events	13/34	0.00418355	0.0252109	2.8402	15.5546	GRIA2;DAGLA;ROCK1;CTNND1;PTPN11;PIK3R1;CDC42;GJA1;FER;PIK3CA;KIF5B;CTNNA1;MAPRE1							miR-509-3p alteration of YAP1/ECM axis WP3967	2021-05-17	0.175367	0.439179	1.90845	3.32238	TEAD4;YAP1;TEAD1;BCAR1;TEAD2
																											Oocyte meiosis	32/113	0.00429391	0.0257635	1.81557	9.89588	ANAPC13;CAMK2D;CUL1;ITPR2;SMC3;PKMYT1;ANAPC10;ANAPC11;PPP1CB;PPP2CA;PPP1CC;CDC23;SLK;SGOL1;PPP2R1B;PTTG1;PPP2R1A;PPP2R5E;CDC27;RPS6KA1;YWHAG;MAPK3;PPP2R5C;SMC1A;YWHAZ;REC8;PPP1CA;MAD2L2;ESPL1;CDK1;CALM1;ANAPC1							Regulation of Wnt/B-catenin Signaling by Small Molecule Compounds WP3664	2021-05-17	0.175367	0.439179	1.90845	3.32238	GSK3B;APC;CSNK1A1;TNKS;TCF4
																											BDNF signaling pathway	64/261	0.00437882	0.0259611	1.49587	8.12405	CDKN1A;ITGB5;NUMA1;WDR1;ARPC1B;SERPINE1;FGF2;HERPUD1;PPP2R1B;DPYSL3;UPP1;JUNB;PTRF;PPP1R16B;DUSP5;PNISR;TMED9;LMO4;IGFBP3;RECQL;FNDC3A;KIF22;RHOB;UGDH;VCAN;VSNL1;HNRNPH1;CDC42EP4;MYH9;RBMS1;SRSF5;SEC22B;TRIB2;PDXK;TWF2;ADD3;POLR2C;SPP1;SSR1;FLNC;S100A11;ZKSCAN1;JAM3;SEC24A;CADM1;GCH1;HSPA5;FEM1B;LRBA;GSS;GFPT1;TFPI2;CYP51A1;NR1D2;PHKB;ATP2B1;CENPF;CLCN5;ID2;MAFF;BAX;HBP1;KCNK1;LIMS1							Pathways in clear cell renal cell carcinoma WP4018	19/85	0.176471	0.439719	1.31938	2.2886	GPI;SETD2;PBRM1;CREBBP;TPI1;STAT3;PLOD2;ENO1;HIF1A;HK1;PFKL;RHEB;MLST8;PGK1;AKT1;PHGDH;ALDOC;PFKM;PGM1
																											Apoptosis	60/242	0.00438214	0.0259611	1.51764	8.24113	HMGB1;PIK3CB;PSMD8;IKBKB;PSMD9;PSMD6;AKT2;CASP3;AKT1;PSMD1;CAPN1;HIST1H1A;APPL1;KPNA1;HELLS;CHUK;UNC5B;DCC;IRAK4;PSMA3;PSMA4;PSMA1;PIK3CA;PRKAR1A;PSME4;PSME1;DSG2;UBA52;KPNB1;TNFRSF21;PLEC;PSMD10;PSMD12;PSMD11;PSMD14;ROCK1;MAGED1;XIAP;PIK3R1;PSMB10;PSMB6;PSMB7;E2F1;FADD;CLSPN;BAK1;RPS27A;PAK2;BCAP31;MAP3K1;BAD;PTK2;MAPK10;OCLN;PSMC6;APC;PSMC1;PSMC2;BAX;ATM							Cytosolic DNA-sensing pathway WP4655	17/75	0.177109	0.439719	1.34323	2.32512	CHUK;PYCARD;IKBKB;MAVS;TBK1;RNF125;POLR3B;POLR3D;POLR1C;POLR1D;POLR2E;POLR3G;POLR3H;FADD;POLR3K;ATG5;POLR2L
																											2-LTR circle formation	2021-04-05	0.00442092	0.0259611	18.3283	99.3652	XRCC4;XRCC5;LIG4;BANF1							Type I interferon induction and signaling during SARS-CoV-2 infection WP4868	2021-08-31	0.178611	0.441545	1.59341	2.74472	IFNAR2;MAVS;TBK1;STAT1;IRAK4;IRF9;JAK1;IFNAR1
																											ATM-mediated phosphorylation of repair proteins	2021-04-05	0.00442092	0.0259611	18.3283	99.3652	H2AFX;ATM;BRCA1;NBN							Host-pathogen interaction of human coronaviruses - MAPK signaling WP4877	1936-09-01	0.183853	0.45256	1.52707	2.58628	MAPK10;MAPK9;MAP3K1;RPS6KA1;MAP2K7;EIF4E;JUNB;MAP3K4;MAPK3
																											N-glycan trimming and elongation in the cis-Golgi	2021-04-05	0.00442092	0.0259611	18.3283	99.3652	MAN1A2;MAN1C1;MGAT1;MANEA							Fatty Acid Biosynthesis WP357	2021-06-22	0.188812	0.454753	1.71767	2.86335	MECR;ECHS1;ACSS2;SCD;ECHDC1;ACSL3
																											Hexose transport	15/42	0.00462681	0.0269082	2.54939	13.7053	RANBP2;NUP205;NUP107;NUP188;NUP155;NUP153;AAAS;HK1;NUP93;NUP85;NUP35;NUP43;NUP54;SLC37A4;RAE1							Methionine De Novo and Salvage Pathway WP3580	2021-06-22	0.188812	0.454753	1.71767	2.86335	AHCY;AMD1;APIP;MTR;MAT2B;ENOPH1
																											Control of gene expression by vitamin D receptor	2021-11-27	0.0046797	0.0269082	3.15346	16.9168	NCOA1;SMARCD1;MED1;CREBBP;SUPT16H;NCOR1;SNW1;PRMT1;NCOA3;COPS2;BAZ1B							NAD+ biosynthetic pathways WP3645	2021-06-22	0.188812	0.454753	1.71767	2.86335	TNKS2;TNKS;NAMPT;NADSYN1;SIRT1;SIRT2
																											EGFR downregulation	2021-11-27	0.0046797	0.0269082	3.15346	16.9168	CDC42;CLTC;AP2S1;AP2A1;EPS15L1;CBL;RPS27A;EPS15;STAM2;UBA52;AP2M1							Regulation of apoptosis by parathyroid hormone-related protein WP3872	2021-06-22	0.188812	0.454753	1.71767	2.86335	BCL2L12;GSK3B;BAX;AKT1;BAK1;BCL2L14
																											Glycolysis	2021-11-27	0.0046797	0.0269082	3.15346	16.9168	PPP2CA;GPI;PFKL;TPI1;PPP2R1B;PPP2R1A;PGK1;ALDOC;ENO1;PFKM;HK1							Type II diabetes mellitus WP1584	2021-06-22	0.188812	0.454753	1.71767	2.86335	IKBKB;SURF1;GK;MAFA;PHKA2;SOCS4
																											VEGFR1 pathway	2021-11-27	0.0046797	0.0269082	3.15346	16.9168	HSP90AA1;PIK3CA;RASA1;AKT1;PTPN11;PIK3R1;CBL;HIF1A;MAPK3;NCK1;CD2AP							Amino Acid metabolism WP3925	20/91	0.189556	0.454753	1.29099	2.147	PDHX;PDHA1;VARS;IDH1;GSS;MCCC1;PYCR1;EPRS;MUT;GLS;HAL;CPS1;RARS;SUCLG1;ACADM;BCAT1;GCLM;DLD;HIBCH;OTC
																											Peroxisomal lipid metabolism	2021-09-20	0.00472577	0.0269486	3.75193	20.0905	GNPAT;ACOT8;AMACR;SCP2;IDH1;AGPS;HSD17B4;FAR1;ACOX3							ncRNAs involved in STAT3 signaling in hepatocellular carcinoma WP4337	2021-04-13	0.191849	0.454753	2.03549	3.36068	IL11RA;STAT3;IL6ST;JAK1
																											Skeletal muscle hypertrophy is regulated via AKT/mTOR pathway	2021-09-20	0.00472577	0.0269486	3.75193	20.0905	PPP2CA;GSK3B;PIK3CA;RPS6KB1;EIF4EBP1;AKT1;PIK3R1;EIF2S2;EIF4E							Osteopontin Signaling WP1434	2021-04-13	0.191849	0.454753	2.03549	3.36068	IKBKB;CHUK;SPP1;MAPK3
																											Unfolded protein response	24/79	0.0048088	0.0273092	2.00406	10.6963	KLHDC3;ACADVL;HSPA5;FKBP14;DIS3;WFS1;DDX11;GOSR2;GFPT1;PARN;EIF2AK3;YIF1A;HERPUD1;HSP90B1;DNAJC3;EXOSC5;SERP1;DNAJB11;SSR1;PREB;HDGF;EXOSC2;EXOSC1;ATF4							Vitamin B12 Disorders WP4271	2021-04-13	0.191849	0.454753	2.03549	3.36068	MTRR;MTR;MUT;CD320
																											Alpha-V beta-3 integrin/OPN pathway	2021-12-31	0.0052085	0.0294579	2.89724	15.2321	CDC42;VAV3;MAP3K1;CHUK;SYK;PIK3CA;ROCK2;SPP1;ILK;PIK3R1;BCAR1;MAPK3							FGFR3 signaling in chondrocyte proliferation and terminal differentiation WP4767	2021-07-27	0.197451	0.466113	1.60321	2.60084	PPP2CA;CDKN1A;RBL1;CNP;STAT1;ATG5;MAPK3
																											Telomerase regulation	21/67	0.00542023	0.0305303	2.09603	10.9363	IFNAR2;HSP90AA1;BLM;HDAC2;TNKS;XRCC5;HUS1;UBE3A;TERF1;WRN;RAD50;RBBP4;RPS6KB1;SIN3A;SP3;E2F1;AKT1;POT1;ATM;NBN;MAPK3							Wnt signaling pathway and pluripotency WP399	22/102	0.200491	0.471359	1.26034	2.02535	GSK3B;PRKCI;CREBBP;WNT5B;CTBP2;CTNND1;ZBTB33;PPP2R5C;NLK;POU5F1;LRP6;SOX2;PPP2CA;MAPK10;MAPK9;CCND3;PPP2R1B;APC;PPP2R1A;PPP2R5E;MAP3K7;PAFAH1B1
																											Eukaryotic protein translation	2021-08-17	0.0055177	0.0308276	4.07552	21.1919	EIF5B;EIF5;EIF6;EIF1AX;EIF2S2;EIF4E;EIF4G3;EIF3A							IL17 signaling pathway WP2112	1932-08-01	0.203103	0.475559	1.52692	2.43398	IKBKB;GSK3B;PIK3CA;STAT3;AKT1;MAP3K7;JAK1;MAPK3
																											Nitric oxide metabolism	2021-08-17	0.0055177	0.0308276	4.07552	21.1919	HSP90AA1;GCH1;NOSIP;AKT1;ZDHHC21;WASL;CALM1;DNM2							15q11.2 copy number variation syndrome WP4940	2021-03-09	0.208692	0.476784	2.2897	3.58772	TUBGCP2;FMR1;NIPA1
																											Sulfur amino acid metabolism	2021-10-24	0.00573073	0.0318887	3.27581	16.9094	GCLC;AHCY;ETHE1;APIP;MTR;SLC25A10;MAT2B;GCLM;ENOPH1;CNDP2							Cytosine methylation WP3585	2021-03-09	0.208692	0.476784	2.2897	3.58772	MBD3;IDH1;TET2
																											GAB1 signalosome	14/39	0.00581844	0.0322468	2.56938	13.2239	GSK3B;CDKN1A;CHUK;BAD;PTPN11;PIK3R1;CREB1;PIK3CA;AKT2;RPS6KB2;MLST8;AKT1;CSK;TRIB3							Heme Biosynthesis WP561	2021-03-09	0.208692	0.476784	2.2897	3.58772	UROD;UROS;HMBS
																											Prostate cancer	26/89	0.00609116	0.0336232	1.89551	9.66886	GSK3B;CDKN1A;ARAF;PIK3CB;PIK3R1;HSP90B1;IKBKB;NRAS;AKT2;ERBB2;E2F1;AKT1;MAPK3;HSP90AA1;CREBBP;CHUK;BAD;BRAF;CREB3;CREB1;PIK3CA;KRAS;SOS1;SOS2;ATF4;CREB5							NLR Proteins WP288	2021-03-09	0.208692	0.476784	2.2897	3.58772	IKBKB;CHUK;MAP3K7
																											Activation of Rac	2021-07-14	0.00624883	0.0339503	4.58424	23.2667	SLIT2;SOS1;PAK2;SOS2;ROBO1;NCK1;PAK4							Supression of HMGB1 mediated inflammation by THBD WP4479	2021-03-09	0.208692	0.476784	2.2897	3.58772	IKBKB;CHUK;HMGB1
																											HIV-1 early elongation complex formation	2021-07-14	0.00624883	0.0339503	4.58424	23.2667	NCBP1;NCBP2;ERCC2;GTF2H1;NELFB;NELFCD;GTF2H3							Endoplasmic reticulum stress response in coronavirus infection WP4861	1947-11-01	0.210415	0.476784	1.39983	2.18188	PPP1CB;PPP1R16B;PPP1R15B;PPP1CC;PPP1R14A;PPP1R14B;PPP1R12A;HSPA5;EIF2AK3;PPP1CA;ATF4
																											Interferon gamma signaling regulation	2021-07-14	0.00624883	0.0339503	4.58424	23.2667	SUMO1;IFNGR1;STAT1;PTPN11;PTPN2;PIAS1;JAK1							One-carbon metabolism and related pathways WP3940	1952-12-01	0.211018	0.476784	1.37443	2.13835	GCLC;AHCYL1;GPX1;PCYT1A;GPX4;GSS;PEMT;MTR;CEPT1;BCAT1;GCLM;BCAT2
																											Intronless pre-mRNA processing	2021-07-14	0.00624883	0.0339503	4.58424	23.2667	NCBP1;NCBP2;PCF11;CPSF3;CSTF3;CPSF2;CSTF2							Wnt Signaling Pathway WP363	1952-12-01	0.211018	0.476784	1.37443	2.13835	GSK3B;MAPK9;GJA1;CDK6;APC;CSNK1A1;RYK;AKT1;TCF4;NLK;MAP3K7;LRP6
																											Beta-oxidation of pristanoyl-CoA	2021-05-08	0.00639219	0.0343238	7.638	38.5923	ACOT8;AMACR;SCP2;HSD17B4;ACOX3							Proximal tubule transport WP4917	13/57	0.211076	0.476784	1.35365	2.10565	ATP6V1A;ABCC4;ATP6V1G1;ATP6V0B;ATP6V0E1;SLC3A2;SLC4A2;ATP1B1;SLC7A8;CA2;ATP6V1D;ATP6V1C1;ATP6V1F
																											Mitotic metaphase/anaphase transition	2021-05-08	0.00639219	0.0343238	7.638	38.5923	STAG1;RAD21;SMC1A;SMC3;REC8							Nanoparticle-mediated activation of receptor signaling WP2643	2021-07-28	0.22527	0.504886	1.52678	2.27559	ITGB1;MAPK10;MAPK9;NRAS;KRAS;SOS1;PTK2
																											RNA polymerase II C-terminal domain phosphorylation and interaction with capping enzyme	2021-05-08	0.00639219	0.0343238	7.638	38.5923	RNGTT;RNMT;ERCC2;GTF2H1;GTF2H3							TLR4 Signaling and Tolerance WP3851	2021-07-28	0.22527	0.504886	1.52678	2.27559	IKBKB;TRAM1;TBK1;CHUK;TAB2;IRAK4;MAP3K7
																											Cell cycle: G1/S checkpoint	2021-11-28	0.00647695	0.0345104	2.96778	14.9562	GSK3B;CDKN1A;SMAD4;CDK6;CDK4;E2F1;CDK1;ATM;SKP2;CDC25A;ATR							Resistin as a regulator of inflammation WP4481	1933-08-01	0.228836	0.507994	1.46576	2.16163	IKBKB;CHUK;PIK3CA;AKT2;AKT1;PIK3CB;PLCD3;MAPK3
																											Extension of telomeres	2021-11-28	0.00647695	0.0345104	2.96778	14.9562	POLA1;FEN1;RFC3;PCNA;RFC1;RFC2;RUVBL2;POLE2;POLD2;NHP2;POLE							MAPK Signaling Pathway WP382	49/246	0.228866	0.507994	1.14042	1.68169	ARAF;ARRB1;ECSIT;FGF2;DUSP16;CRKL;ELK4;IKBKB;AKT2;CASP3;AKT1;MAP3K7;MAP3K4;DUSP3;CHUK;PLA2G4C;TGFBR1;PPM1A;PPM1B;RASA1;RAPGEF2;SOS1;CRK;SOS2;ATF4;SRF;NLK;STK4;STK3;CDC42;MAPK9;NRAS;RAP1A;FLNA;FLNC;MAP2K7;PAK2;MAP4K3;MAPK3;MAP3K2;MAP3K1;NFATC3;BRAF;MAPK10;PPP5C;TAOK2;TAB2;KRAS;LAMTOR3
																											Glutathione biosynthesis and recycling	2021-06-11	0.0066967	0.0351386	5.50022	27.5349	GGCT;GCLC;GSS;GCLM;GGT1;CNDP2							Neural Crest Cell Migration in Cancer WP4565	1943-10-01	0.231647	0.507994	1.38813	2.03019	TIAM1;PIK3CA;SORT1;KIDINS220;AKT2;STAT3;AKT1;PIK3CB;PAK2;PAK4
																											Sonic Hedgehog (SHH) receptor PTCH1 regulation of cell cycle	2021-06-11	0.0066967	0.0351386	5.50022	27.5349	CDK7;XPO1;CCNH;CDK1;MNAT1;CDC25A							Rett syndrome causing genes WP4312	1948-11-01	0.231725	0.507994	1.36191	1.99139	XAB2;NCOR1;TBL1XR1;IMPDH2;GPS2;HTT;BRAF;TCF4;SMC1A;CRK;SYNE2
																											TGF-beta signaling in gastrointestinal stem cells	2021-06-11	0.0066967	0.0351386	5.50022	27.5349	SMAD2;SMAD4;SMAD9;SMAD5;SPTBN1;TGFBR1							Kennedy pathway from sphingolipids WP3933	2021-04-14	0.232831	0.507994	1.83183	2.66978	PTDSS2;PCYT1A;PEMT;CEPT1
																											Unwinding of DNA	2021-06-11	0.0066967	0.0351386	5.50022	27.5349	GINS2;MCM7;MCM8;MCM4;MCM5;MCM2							Omega-9 FA synthesis WP4724	2021-04-14	0.232831	0.507994	1.83183	2.66978	ELOVL5;SCD;ELOVL6;ACSL3
																											T cell receptor signaling pathway	37/139	0.00690336	0.0360857	1.66726	8.29585	GSK3B;NFAT5;ARHGAP1;PIK3R1;PIK3CB;ASAP2;ARHGAP5;CBL;MALT1;IKBKB;CDC42;MAPK9;NRAS;AKT2;AKT1;MAP2K7;MAP3K7;PAK2;NCK1;MAPK3;PAK4;VAV3;RALBP1;MAP3K1;CHUK;NFATC3;ARAP1;ARFGAP3;DLG1;IL5;PIK3CA;CDK4;RASA1;KRAS;CALM1;SOS1;SOS2							Riboflavin and CoQ disorders WP5037	2021-04-14	0.232831	0.507994	1.83183	2.66978	FLAD1;RFK;ETFDH;COQ6
																											APC/C activator regulation between G1/S and early anaphase	2021-09-21	0.00697043	0.0362988	3.43906	17.0786	FZR1;CDC23;UBE2C;CDC27;CDK1;UBE2D1;ANAPC10;ANAPC1;ANAPC11							miRNA regulation of p53 pathway in prostate cancer WP3982	2021-06-24	0.251144	0.541794	1.52663	2.10939	ZMAT3;CASP3;PERP;SERPINE1;BAX;ATM
																											Ephrin receptor B forward pathway	19/60	0.00703311	0.0364876	2.12713	10.5445	LYN;GRB7;YES1;ROCK1;ITSN1;WASL;PIK3R1;PTK2;CDC42;TIAM1;NRAS;RAP1A;PIK3CA;RASA1;KRAS;MAP3K7;CRK;NCK1;MAPK3							NAD Metabolism in Oncogene-Induced Senescence and Mitochondrial Dysfunction-Associated Senescence WP5046	2021-06-24	0.251144	0.541794	1.52663	2.10939	PRKAA1;NAMPT;HMGA1;NMNAT2;SIRT1;SIRT2
																											G alpha (12/13) signaling events	23/77	0.00713578	0.0368815	1.9557	9.66629	VAV3;ROCK1;ROCK2;ITSN1;ARHGEF16;RHOG;ARHGEF18;PIK3R1;RHOC;RHOB;CDC42;FGD3;GNA13;NET1;TIAM1;GNG10;PIK3CA;GNB2;GNB4;ARHGEF2;SOS1;ECT2;SOS2							Triacylglyceride synthesis WP325	2021-06-24	0.251144	0.541794	1.52663	2.10939	AGPAT5;GNPAT;GK;GPAM;AGPS;AGPAT2
																											TGF-beta regulation of extracellular matrix	124/565	0.00780725	0.0402015	1.29731	6.29544	RPL5;SERPINE1;CCNF;GOLIM4;NUDT2;PEBP1;PLOD2;CCNC;SPINT2;SAT1;GOLGA4;RPL18A;PTTG1;DPYSL2;RUVBL2;ARL6IP5;FAM3C;JUNB;RPP38;CDK5RAP2;PUS1;NSMCE1;ACSL3;GTPBP2;VRK3;ATP1B1;SEPP1;MID1;CDC25A;ALDH3A2;MORF4L2;RBP1;HECA;TRIB3;ZFPM2;SLC27A4;EPHA2;IDI1;COPB1;TACSTD2;MGST1;PIK3R1;CNN1;SDCBP;EPB41L2;PMVK;EIF4EBP1;SSR1;ZNF148;SKIL;S100A11;XRCC4;DENND4A;TFPI2;CDK6;CPD;ID2;PIR;MIPEP;ITGAM;AKR1B1;SLC7A11;LAMC1;HER…							T-cell receptor (TCR) signaling pathway WP69	19/90	0.252227	0.5421	1.22609	1.68885	VAV3;CHUK;RIPK2;PTPN11;PIK3R1;CBL;MALT1;CRKL;IKBKB;CDC42;MAPK9;CREB1;AKT1;SOS1;MAP3K7;CRK;SH2B3;NCK1;MAPK3
																											ATM-dependent DNA damage response	24/82	0.00799159	0.0403546	1.90006	9.17607	GSK3B;CDKN1A;SMAD4;MAP3K1;WNT5B;BAD;HMGB1;PPP2R5C;CDC42;MAPK10;MAPK9;CCND3;SCP2;APC;PPP2R5E;CAT;ERBB2;BAX;ATM;BAK1;SOS1;MAP3K7;SOS2;MAP3K4							Phosphoinositides metabolism WP4971	1949-11-01	0.25382	0.542129	1.32599	1.81811	MTMR10;MTMR2;PIKFYVE;PIK3CA;SACM1L;PIK3CB;PIK3C2A;PLCD3;SBF2;MTMR6;MTM1
																											SMAD2/3 nuclear pathway	24/82	0.00799159	0.0403546	1.90006	9.17607	NCOA1;SMAD2;CDKN1A;HDAC2;CREBBP;SMAD4;TGIF2;ITGB5;CBFB;SERPINE1;LAMC1;MED15;RUNX2;CREB1;NCOR1;RBL1;IL5;RBBP4;SIN3A;CDK4;SP3;AKT1;E2F4;SKIL							Lipid Metabolism Pathway WP3965	2021-07-29	0.254332	0.542129	1.45729	1.9952	BCKDHA;PRKAA1;ACSS2;PDHA1;PRKAR1A;AKT2;AKT1
																											Signaling by PDGF	33/122	0.0080189	0.0403546	1.70366	8.22177	GRB7;GSK3B;CDKN1A;ITPR2;FURIN;PIK3R1;PIK3CB;CRKL;NRAS;AKT2;ADRBK1;MLST8;SPP1;AKT1;NCK1;MAPK3;CHUK;BAD;STAT1;STAT3;PTPN11;CREB1;PIK3CA;PRKAR1A;RASA1;RPS6KB2;CDK1;TRIB3;KRAS;CALM1;SOS1;CRK;BCAR1							Neurodegeneration with brain iron accumulation (NBIA) subtypes pathway WP4577	1944-10-01	0.255064	0.542129	1.34722	1.84062	BECN1;PRKAA1;SPTLC1;SCP2;ATG101;RHEB;ATG16L1;MLST8;GTPBP2;ATG5
																											APC/C- and Cdc20-mediated degradation of Nek2A	2021-10-25	0.00803902	0.0403546	3.05723	14.7464	CDC23;UBE2C;CDC27;CDK1;UBE2D1;RPS27A;UBA52;ANAPC10;ANAPC1;ANAPC11							Ethanol metabolism resulting in production of ROS by CYP2E1 WP4269	2021-03-10	0.260739	0.548122	1.96248	2.63804	MAFF;MAFK;NFE2L2
																											Glutathione conjugation	2021-10-25	0.00803902	0.0403546	3.05723	14.7464	GSTM4;GGCT;GCLC;GSTO1;MGST3;GSS;MGST1;GGT1;GCLM;CNDP2							TCA cycle in senescence WP5050	2021-03-10	0.260739	0.548122	1.96248	2.63804	PDHA1;BRAF;ME2
																											Regulatory RNA pathways	2021-10-25	0.00803902	0.0403546	3.05723	14.7464	POLR2B;POLR2C;POLR2D;POLR2E;DROSHA;POLR2G;POLR2I;TNRC6A;POLR2L;TNRC6B							Type III interferon signaling WP2113	2021-03-10	0.260739	0.548122	1.96248	2.63804	STAT1;IRF9;JAK1
																											mTOR signaling pathway	31/113	0.00804168	0.0403546	1.73679	8.37675	PRKAA1;RRN3;CAB39;POLDIP3;PIK3R1;PIK3CB;HIF1A;IKBKB;PPP2CA;NRAS;AKT2;RPS6KA1;EIF4EBP1;MLST8;AKT1;EIF4E;YWHAG;MAPK3;STRADA;BRAF;YWHAZ;CLIP1;PIK3CA;RPS6KB1;RHEB;EIF4E1B;RPS6KB2;ULK3;KRAS;EIF4G3;EIF3A							ERK Pathway in Huntington's Disease WP3853	2021-04-15	0.275641	0.570668	1.66519	2.14586	CREB1;CASP3;HTT;MAP2K7
																											ERK1/ERK2 MAPK pathway	20/65	0.00819883	0.0409942	2.04013	9.80031	ATF1;ITGB1;BAD;STAT3;ARAF;BRAF;PPP2CA;NRAS;CREB1;RAP1A;RPS6KB1;RPS6KC1;RPS6KA1;RPS6KB2;EIF4EBP1;KRAS;SOS1;SOS2;EIF4E;MAPK3							Regulation of toll-like receptor signaling pathway WP1449	28/139	0.278456	0.570668	1.15584	1.47773	CUEDC2;PIK3R1;PIK3CB;IKBKB;MAPK9;TBK1;AKT2;MLST8;SPP1;AKT1;FADD;MAP2K7;MAP3K7;MAPK3;IFNAR2;FBXW5;CISH;CHUK;SYK;STAT1;IRAK4;RNF41;MAPK10;PIK3CA;TAB3;TAB2;ZMYND11;IFNAR1
																											Toll receptor cascades	41/159	0.00830728	0.0413865	1.59723	7.65171	ATF1;APP;UBE2D1;HMGB1;ECSIT;HSP90B1;EEA1;IKBKB;PPP2CA;MAPK9;TBK1;PPP2R1B;PPP2R1A;UBE2Q2;RPS6KA1;MAP2K7;RPS27A;MAP3K7;MAPK3;MEF2A;UBE2F;UBE2H;UBE2I;DUSP3;MAP3K1;CHUK;UBE2C;RIPK2;UBE2E2;IRAK4;DNM2;MAPK10;UBE2W;CREB1;UBE2S;UBE2V2;CDK1;TAB3;TAB2;UBA52;UBE2K							Glycolysis and Gluconeogenesis WP534	1945-10-01	0.279228	0.570668	1.30864	1.66947	GPI;PFKL;TPI1;PDHA1;PGK1;ALDOC;ENO1;DLD;PFKM;HK1
																											CDK regulation of DNA replication	2021-08-18	0.00838911	0.0414945	3.66775	17.5348	CDT1;ORC4;MCM7;ORC3;ORC2;MCM4;MCM5;MCM2							Bladder cancer WP2828	1940-09-01	0.281534	0.570668	1.32971	1.6854	CDKN1A;NRAS;CDK4;ERBB2;ARAF;E2F1;BRAF;KRAS;PIK3R1
																											Nucleotide di- and triphosphate biosynthesis and interconversion	2021-08-18	0.00838911	0.0414945	3.66775	17.5348	DTYMK;RRM1;RRM2B;GUK1;TXNRD1;AK1;AK2;CMPK1							Microglia Pathogen Phagocytosis Pathway WP3937	1940-09-01	0.281534	0.570668	1.32971	1.6854	VAV3;LYN;ITGAM;SYK;PIK3CA;ARPC1B;PIK3R1;PIK3CB;PIK3C2A
																											Signaling by insulin receptor	30/109	0.00859556	0.0423638	1.74442	8.29736	ATP6V1A;PRKAA1;CAB39;PIK3R1;PIK3CB;FGF2;NRAS;AKT2;EIF4EBP1;MLST8;ATP6V1D;EIF4E;ATP6V1C1;ATP6V1F;MAPK3;ATP6V1G1;ATP6V0B;ATP6V0E1;STRADA;PTPN11;PPM1A;PIK3CA;RPS6KB1;RHEB;CDK1;ATP6V1B2;TRIB3;KRAS;SOS1;CRK							BMP Signaling Pathway in Eyelid Development WP3927	2021-05-20	0.281921	0.570668	1.52648	1.93272	MAPK9;SMAD4;MAP3K1;SMAD5;MAPK3
																											ADP-ribosylation factor	2021-11-29	0.00877224	0.042928	2.80274	13.2742	ARFGEF1;CYTH2;ARFGEF2;RALBP1;ARHGAP1;CLTB;KDELR2;ASAP2;ARAP1;ARHGAP5;ARFGAP3							Hematopoietic Stem Cell Gene Regulation by GABP alpha/beta Complex WP3657	2021-05-20	0.281921	0.570668	1.52648	1.93272	SMAD4;CREBBP;ATM;ZFX;GABPA
																											Sema4D in semaphorin signaling	2021-11-29	0.00877224	0.042928	2.80274	13.2742	CDC42;MYL6;ROCK1;ROCK2;ERBB2;LIMK1;RHOG;MYH9;RHOC;MYH10;RHOB							Hypertrophy Model WP516	2021-05-20	0.281921	0.570668	1.52648	1.93272	WDR1;IFRD1;EIF4EBP1;ADAM10;EIF4E
																											Pathogenic Escherichia coli infection	18/57	0.00884386	0.0431255	2.11819	10.0149	ITGB1;ROCK1;TUBAL3;ROCK2;ARPC1B;ARPC5L;ARPC4;WASL;TUBB4B;YWHAZ;ACTB;CDC42;TUBB6;OCLN;KRT18;ARPC3;ARHGEF2;NCK1							Metabolism of Spingolipids in ER and Golgi apparatus WP4142	2021-05-20	0.281921	0.570668	1.52648	1.93272	B4GALT2;SPHK2;GALNT1;SPHK1;KDSR
																											Actin cytoskeleton regulation	55/226	0.00911535	0.0442929	1.47957	6.95071	ITGB1;NCKAP1;ITGAM;ITGB5;ARPC1B;ARAF;ARPC5L;BRK1;WASL;PIK3CB;PIK3C2A;FGF2;ACTB;CRKL;PPP1CB;PPP1CC;CFL2;GIT1;VAV3;PPP1R12A;ENAH;TIAM1;PIK3CA;MYH9;SOS1;CRK;DOCK1;SOS2;PFN2;ROCK1;ROCK2;IQGAP1;PIK3R1;FGD3;CDC42;GNA13;NRAS;CSK;MAPK6;PAK2;MYH10;PAK4;MAPK3;RDX;LIMK1;BRAF;ARPC4;PTK2;PPP1CA;PIKFYVE;DIAPH3;APC;ARPC3;KRAS;BCAR1							Nanomaterial induced apoptosis WP2507	2021-05-20	0.281921	0.570668	1.52648	1.93272	CASP3;HTRA2;BAX;FADD;BAK1
																											FoxO family signaling	16/49	0.00934107	0.0451659	2.22473	10.3969	CSNK1G3;CREBBP;CHUK;CSNK1A1;ZFAND5;SIRT1;YWHAZ;IKBKB;MAPK10;MAPK9;XPO1;CAT;AKT1;SKP2;YWHAG;CSNK1G2							FBXL10 enhancement of MAP/ERK signaling in diffuse large B-cell lymphoma WP4553	1935-08-01	0.283353	0.570668	1.35702	1.71128	SUZ12;HIST1H3A;H2AFJ;H2AFX;BCOR;HIST1H3C;MAPK3;EZH2
																											Signaling events mediated by HDAC class I	21/70	0.00936047	0.0451659	1.96734	9.18996	MBD3;RANBP2;HDAC2;CREBBP;HDAC3;UBE2I;MBD2;STAT3;NUP153;RANGAP1;SIRT1;NR2C1;SIRT2;HDAC6;WDR77;XPO1;NCOR1;SUMO1;RBBP4;SIN3A;MTA2							The influence of laminopathies on Wnt signaling WP4844	1935-08-01	0.283353	0.570668	1.35702	1.71128	GSK3B;CDK6;APC;CSNK1A1;SPP1;EMD;RUNX2;ZMPSTE24
																											PI3K/AKT activation	13/37	0.00947328	0.045551	2.48472	11.577	GSK3B;CDKN1A;CHUK;BAD;PIK3CB;PIK3R1;CREB1;PIK3CA;AKT2;RPS6KB2;MLST8;AKT1;TRIB3							Autophagy WP4923	2021-07-30	0.284408	0.570798	1.39384	1.75254	BECN1;UVRAG;PRKAA1;ATG101;ATG16L1;MLST8;ATG5
																											ERBB1 internalization pathway	14/41	0.00954707	0.0457464	2.37877	11.0649	TSG101;ITSN1;UBE2D1;PIK3CB;PIK3R1;CBL;PTK2;CDC42;NRAS;PIK3CA;KRAS;SOS1;EPS15;RAB5A							AGE/RAGE pathway WP2324	14/66	0.287886	0.575762	1.23325	1.53563	SMAD2;CHUK;ROCK1;STAT1;STAT3;IRAK4;HIF1A;DDOST;IKBKB;CDC42;MAPK9;CASP3;AKT1;MAPK3
																											TNF-alpha signaling pathway	28/101	0.00981155	0.0468078	1.7616	8.14599	CUL1;TANK;IKBKB;PPP2CA;MAPK9;TBK1;CASP3;RFK;AKT1;FADD;MAP2K7;MAP4K5;MAP3K7;MAP4K3;MAPK3;TRAP1;PRKCI;CREBBP;HSP90AA1;MAP3K1;CHUK;BAD;STAT1;ADAM17;TAB3;BAX;TAB2;SOS1							Toll-like Receptor Signaling Pathway WP75	21/103	0.293613	0.575762	1.17324	1.43779	IFNAR2;CHUK;STAT1;PIK3R1;PIK3CB;IRAK4;IKBKB;MAPK10;MAPK9;TBK1;PIK3CA;AKT2;SPP1;AKT1;TAB3;TAB2;FADD;MAP2K7;MAP3K7;IFNAR1;MAPK3
																											Immune system signaling by interferons, interleukins, prolactin, and growth hormones	66/280	0.00983643	0.0468078	1.41939	6.55995	NUP107;NUP188;EIF4A3;PIK3CB;CRKL;IKBKB;SUMO1;KPNA4;B2M;KPNA3;MAP3K7;JAK1;KPNA1;IFNAR2;SYK;CISH;CHUK;IFNGR1;RIPK2;IRAK4;YWHAZ;PIAS1;NUP93;ADAM17;PPM1B;PIK3CA;NUP54;IL6ST;SOS1;UBA52;CRK;KPNB1;IRF9;IFNAR1;NUP205;SP100;CAMK2D;CUL1;PIK3R1;AAAS;CBL;NRAS;NUP85;NUP43;RPS27A;RAE1;EIF4E;MAPK3;LYN;RANBP2;YES1;NUP155;STAT1;STAT3;NUP153;PTPN11;ISG20;IL5;CDK1;PIN1;TAB3;NUP35;TAB2;KRAS;EIF4G3;PTPN2							Cellular Proteostasis WP4918	2021-02-06	0.293879	0.575762	2.28934	2.8035	VBP1;PFDN5
																											Terpenoid backbone biosynthesis	2021-07-15	0.00992236	0.0468504	4.01097	18.5024	FDPS;IDI1;MVK;GGPS1;PMVK;MVD;HMGCR							let-7 inhibition of ES cell reprogramming WP3299	2021-02-06	0.293879	0.575762	2.28934	2.8035	SOX2;POU5F1
																											Fanconi anemia pathway	2021-09-22	0.00994722	0.0468504	3.17432	14.6351	FANCA;USP1;ATM;BRCA1;RPS27A;PALB2;UBA52;FANCG;ATR							LncRNA-mediated mechanisms of therapeutic resistance WP3672	2021-02-06	0.293879	0.575762	2.28934	2.8035	CDKN1A;HIF1A
																											Nephrin interactions	2021-09-22	0.00994722	0.0468504	3.17432	14.6351	PIK3CA;CASK;IQGAP1;PIK3CB;PIK3R1;WASL;SPTBN1;CD2AP;NCK1							mir-124 predicted interactions with cell cycle and differentiation WP3595	2021-02-06	0.293879	0.575762	2.28934	2.8035	PRKAA1;SIX4
																											Signaling events mediated by focal adhesion kinase	19/62	0.0102808	0.0482569	2.02795	9.28289	ITGB1;GRB7;YES1;ITGB5;ROCK2;BRAF;WASL;PIK3R1;PTK2;MAPK9;RAP1A;PIK3CA;RASA1;ELMO1;SOS1;CRK;DOCK1;BCAR1;NCK1							Somatroph axis (GH) and its relationship to dietary restriction and aging WP4186	2021-02-06	0.293879	0.575762	2.28934	2.8035	AKT1;SIRT1
																											Estrogen receptor transcription factor targets	2021-10-26	0.011	0.051284	2.86598	12.9252	NCOA1;MED1;TAF6L;DDX5;CREBBP;HDAC3;NCOR1;NCOA3;DBT;SRA1							Primary focal segmental glomerulosclerosis (FSGS) WP2572	15/72	0.303625	0.592841	1.2054	1.43679	ITGB1;CDKN1A;PCNA;CD151;ILK;MKI67;PTK2;CD2AP;LRP6;FAT1;AKT1;MYH9;UTRN;NCK1;LIMS1
																											Galactose metabolism	2021-10-26	0.011	0.051284	2.86598	12.9252	B4GALT2;GALE;PFKL;GALT;UGP2;AKR1B1;PFKM;PGM1;HK1;GALK1							Ras signaling WP4223	36/184	0.308637	0.60033	1.11453	1.31023	PIK3R1;PIK3CB;STK4;IKBKB;CDC42;MAPK9;GNG10;NRAS;RAP1A;AKT2;AKT1;ABL2;SHOC2;PAK2;PAK4;MAPK3;RALBP1;PLA2G12A;CHUK;BAD;PLA2G4C;PTPN11;MAPK10;TIAM1;PIK3CA;GNB2;RASA1;KIT;GNB4;KRAS;CALM1;SOS1;RGL2;RAB5A;SOS2;EPHA2
																											Kit receptor signaling pathway	17/54	0.011133	0.0517293	2.10831	9.48285	LYN;GRB7;BAD;STAT1;STAT3;PTPN11;PIK3R1;CBL;RPS6KB1;RPS6KA1;KIT;AKT1;SOS1;SOCS6;JUNB;CRK;MAPK3							Zinc homeostasis WP3529	1936-08-01	0.311781	0.60033	1.30847	1.52496	SLC30A7;SLC30A6;SLC30A9;SLC39A9;SLC39A6;SLC39A10;SLC30A1;SLC39A3
																											eIF4E release	2021-04-06	0.0113753	0.0525178	9.1636	41.0191	RHEB;EIF4EBP1;MLST8;EIF4E							Alzheimer's disease WP2059	17/83	0.312945	0.60033	1.17984	1.37065	PSENEN;APP;GSK3B;BAD;EIF2AK3;ATP2A2;ADAM10;ITPR2;IDE;HSD17B10;ADAM17;CASP3;GNAQ;CAPN1;FADD;CALM1;MAPK3
																											Assembly of HIV virion	2021-06-12	0.0113788	0.0525178	4.58324	20.5146	TSG101;VPS37A;VPS37B;RPS27A;UBA52;VPS28							SRF and miRs in Smooth Muscle Differentiation and Proliferation WP1991	2021-03-11	0.314136	0.60033	1.71707	1.98824	MEF2A;CAMK2D;SRF
																											CDC42 activity regulation	2021-11-30	0.0116485	0.0532	2.65506	11.8219	DOCK6;ITSN2;CDC42;DOCK10;VAV3;RALBP1;APC;ITSN1;ARHGAP1;ARHGAP17;GIT1							SARS coronavirus and innate immunity WP4912	2021-07-31	0.315266	0.60033	1.33569	1.54183	IFNAR2;MAVS;TBK1;STAT1;IRF9;JAK1;IFNAR1
																											Nectin adhesion pathway	2021-11-30	0.0116485	0.0532	2.65506	11.8219	CDC42;RAP1A;PIK3CA;CTNNA1;IQGAP1;PIK3R1;F11R;MLLT4;PVR;CRK;PTK2							ID signaling pathway WP53	2021-04-16	0.319562	0.60033	1.52634	1.74125	ELK4;RBL1;ID2;ID1
																											Nuclear events mediated by MAP kinases	2021-11-30	0.0116485	0.0532	2.65506	11.8219	ATF1;PPP2CA;MEF2A;MAPK10;MAPK9;DUSP3;CREB1;PPP2R1B;PPP2R1A;RPS6KA1;MAPK3							NAD+ metabolism WP3644	2021-04-16	0.319562	0.60033	1.52634	1.74125	NAMPT;NMNAT2;SIRT1;SIRT2
																											Interleukin-1 signaling pathway	33/125	0.0116809	0.0532	1.6478	7.33238	CUL1;UBE2D1;PIK3R1;ECSIT;ELK4;IKBKB;MAPK9;UBE2Q2;AKT1;MAP2K7;MAPK6;MAP3K7;MAPK3;UBE2F;MAP3K2;PRKCI;UBE2H;UBE2I;MAP3K1;CHUK;UBE2C;RIPK2;UBE2E2;PTPN11;IRAK4;MAPK10;UBE2W;PIK3CA;UBE2S;UBE2V2;TAB3;TAB2;UBE2K							Osteoclast Signaling WP12	2021-04-16	0.319562	0.60033	1.52634	1.74125	ATP6V1G1;SPP1;TNFRSF11B;IFNAR1
																											p53 signaling pathway	36/139	0.0119093	0.05358	1.6059	7.11482	DDX5;CDKN1A;HDAC2;PCNA;CSE1L;SERPINE1;HTT;RPS27L;PRDM1;PYCARD;PERP;TP53INP1;TP53BP2;E2F1;SPP1;DROSHA;BAK1;CTSD;BCL2L14;PLK3;DUSP5;CREBBP;GPX1;PRMT1;IGFBP3;TADA2B;VCAN;RGCC;TP53I3;MSH2;RRM2B;APC;CCNG1;BAX;CEBPZ;EPHA2							Pathways of nucleic acid metabolism and innate immune sensing WP4705	2021-04-16	0.319562	0.60033	1.52634	1.74125	RNASEH2C;MAVS;RNASEH2A;RNASET2
																											Signaling events mediated by T cell protein tyrosine phosphatase (TC-PTP)	14/42	0.0120072	0.05358	2.29367	10.1432	ITGB1;CREBBP;STAT1;STAT3;PIK3CB;PIK3R1;PIAS1;LMAN1;PIK3CA;SOS1;KPNB1;PTPN2;JAK1;ATR							TCA Cycle and Deficiency of Pyruvate Dehydrogenase complex (PDHc) WP2453	2021-04-16	0.319562	0.60033	1.52634	1.74125	PDHA1;IDH1;SUCLG2;DLD
																											RAC1 activity regulation	13/38	0.0120841	0.05358	2.38519	10.5327	DOCK6;VAV3;RALBP1;RAP1GDS1;ARHGAP1;ARHGAP17;TIAM1;ABI1;ELMO1;ARHGEF2;DOCK2;SOS1;DOCK1							Tryptophan catabolism leading to NAD+ production WP4210	2021-04-16	0.319562	0.60033	1.52634	1.74125	NMRK1;NAMPT;NMNAT2;NADSYN1
																											Signaling events mediated by HDAC class II	13/38	0.0120841	0.05358	2.38519	10.5327	RANBP2;HSP90AA1;HDAC3;UBE2I;SRF;NUP153;RFXANK;RANGAP1;HDAC6;XPO1;SUMO1;ADRBK1;BCOR							Host-pathogen interaction of human coronaviruses - apoptosis WP4864	2021-05-21	0.319968	0.60033	1.43099	1.63066	BAD;CASP3;BAX;AKT1;FADD
																											Signaling of hepatocyte growth factor receptor	13/38	0.0120841	0.05358	2.38519	10.5327	ITGB1;STAT3;PTPN11;PIK3R1;PTK2;CRKL;RAP1A;PIK3CA;RASA1;SOS1;CRK;DOCK1;MAPK3							Netrin-UNC5B signaling pathway WP4747	1952-11-01	0.323853	0.605647	1.22874	1.38537	YAP1;PPP2R1B;PIK3CA;UNC5B;CASP3;AKT1;PTPN11;RLF;PTK2;MAPK3;PPP1CA
																											ER-associated degradation (ERAD) pathway	2021-08-19	0.0122464	0.05358	3.33411	14.6785	UBE2I;MAN1A2;CANX;CUL1;MAN1C1;UBA2;MAN2C1;UGGT1							Splicing factor NOVA regulated synaptic proteins WP4148	1942-09-01	0.334953	0.624379	1.24896	1.36607	MAPK9;SNW1;CADM1;CHL1;EPB41L2;CASK;ATP2B1;STX2;CLASP1
																											FRS2-mediated activation	2021-08-19	0.0122464	0.05358	3.33411	14.6785	NRAS;RAP1A;KIDINS220;CDK1;BRAF;KRAS;CRK;MAPK3							Overview of interferons-mediated signaling pathway WP4558	1937-08-01	0.340747	0.63313	1.26328	1.36006	IFNAR2;PIK3CA;STAT1;IFNGR1;PIK3R1;IRF9;JAK1;IFNAR1
																											Resolution of abasic sites (AP sites)	2021-08-19	0.0122464	0.05358	3.33411	14.6785	SMUG1;MBD4;FEN1;PCNA;MPG;APEX1;POLD2;LIG3							Initiation of transcription and translation elongation at the HIV-1 LTR WP3414	1932-07-01	0.346671	0.642066	1.28218	1.35831	CDK9;HDAC2;CREBBP;HDAC3;NFATC3;NELFB;NELFCD
																											Abl role in Robo-Slit signaling	2021-05-09	0.012269	0.05358	5.72815	25.2077	ABL2;SLIT2;CLASP1;CLASP2;ROBO1							7-oxo-C and 7beta-HC pathways WP5064	2021-06-27	0.352657	0.651059	1.3083	1.36359	ACOT8;ACOT7;AMACR;SCP2;DHCR7;SLC27A5
																											COPII-mediated vesicle transport	2021-05-09	0.012269	0.05358	5.72815	25.2077	SEC23A;SEC24A;SAR1B;PREB;SEC24D							Glycerolipids and Glycerophospholipids WP4722	2021-05-22	0.358543	0.65369	1.34673	1.38135	PTDSS2;PCYT1A;GPAM;PEMT;DGKZ
																											Folding of actin by CCT/TriC	2021-05-09	0.012269	0.05358	5.72815	25.2077	CCT3;CCT6A;CCT7;ACTB;CCT4							Cori Cycle WP1946	2021-04-17	0.36393	0.65369	1.40884	1.42404	GPI;TPI1;PGK1;HK1
																											Polyadenylation of mRNA	2021-05-09	0.012269	0.05358	5.72815	25.2077	CPSF4;CPSF3;CSTF3;CPSF2;CSTF2							MAP3K1 role in promoting and blocking gonadal determination WP4872	2021-04-17	0.36393	0.65369	1.40884	1.42404	GSK3B;MAP3K1;ROCK1;MAP3K4
																											Tat-mediated elongation of the HIV-1 transcript	2021-05-09	0.012269	0.05358	5.72815	25.2077	ELL;ERCC2;TCEA1;GTF2H1;GTF2H3							Mitochondrial LC-Fatty Acid Beta-Oxidation WP368	2021-04-17	0.36393	0.65369	1.40884	1.42404	ACADVL;SCP2;ACSL3;ACADM
																											Hemostasis pathway	103/468	0.0131977	0.0574539	1.30029	5.62726	APP;DGKD;SERPINE1;F13A1;JMJD1C;F11R;DOCK10;PPP2R1B;PPP2R1A;AKT2;KIF5B;LAMP2;BSG;AKT1;KIFAP3;ATP1B1;DGKZ;PRKAR1A;ZFPM2;GRB7;STXBP3;ITPR2;PIK3R1;KLC3;GNG10;RAP1A;HIST1H3A;LYN;CREBBP;YES1;HSPA5;PTK2;GNAQ;GNB2;MAFF;CALU;GNB4;MRVI1;MAFK;CALM1;RAB5A;ITGB1;DOCK6;DAGLA;ITGAM;WDR1;DOCK7;ATP2A2;ARRB1;PIK3CB;KIF11;SLC7A11;KIF15;SIN3A;PPP2R5E;OLR1;PRKG1;VAV3;ABCC4;SYK;RHOG;KIF23;KIF22;PPP2R5C;YWHAZ;RHOB;SLC7…							Arachidonate Epoxygenase / Epoxide Hydrolase WP678	2021-02-07	0.365708	0.65369	1.83136	1.8422	COX8A;COX5A
																											Mitochondrial pathway of apoptosis: caspases	22/77	0.0144241	0.062595	1.83603	7.78266	HSP90AA1;ROCK1;HSPA4;APIP;XIAP;COMMD1;HSPA14;HSPE1;HSPA13;PTK2;RNF41;HSPD1;IKBKB;CAPN7;CASP3;CHEK1;BIRC6;CAPN1;CYC1;MAP3K7;PAK2;LAMTOR5							Pentose Phosphate Metabolism WP134	2021-02-07	0.365708	0.65369	1.83136	1.8422	RPE;PGLS
																											Pentose phosphate pathway	2021-10-27	0.0147179	0.0632788	2.69723	11.3788	PRPS2;GPI;PRPS1;PFKL;RPEL1;RPE;ALDOC;PGLS;PFKM;PGM1							Focal Adhesion-PI3K-Akt-mTOR-signaling pathway WP3932	57/303	0.366305	0.65369	1.06156	1.06611	ITGB1;GSK3B;CDKN1A;ITGB5;PIK3CB;LAMC1;PIK3C2A;FGF2;IKBKB;GYS1;PPP2R1B;PPP2R1A;PPP2R5E;AKT2;MLST8;AKT1;JAK1;RAB2A;IFNAR2;HSP90AA1;STRADA;PPP2R5C;CREB3;CREB1;PIK3CA;EIF4E1B;KIT;SOS1;EPHA2;ATF4;IFNAR1;CREB5;PRKAA1;CAB39;PIK3R1;HIF1A;HSP90B1;PPP2CA;GNG10;NRAS;SPP1;EIF4EBP1;EIF4E;MAPK3;ANGPT1;BAD;LAMB1;PTK2;RAB11B;RAB10;RAB14;RPS6KB1;RHEB;GNB2;RPS6KB2;GNB4;KRAS
																											RORA activates circadian expression	2021-10-27	0.0147179	0.0632788	2.69723	11.3788	NCOA1;MED1;CREBBP;HDAC3;NCOR1;CHD9;NCOA6;TBL1XR1;TGS1;NCOA3							Myometrial relaxation and contraction pathways WP289	30/156	0.36691	0.65369	1.09058	1.09346	ATF1;CAMK2D;ITPR2;ATP2A2;ARRB1;ACTB;CNN2;CNN1;GJA1;CALD1;GRK6;GABPA;YWHAG;GSTO1;IGFBP3;PDE4D;DGKZ;YWHAZ;CREB3;CREB1;PRKAR1A;GNB2;GNAQ;MAFF;GNB4;RGS10;ACKR3;CALM1;PKIG;ATF4
																											B cell survival pathway	2021-07-16	0.0149485	0.0632788	3.56509	14.9846	ITGB1;PIK3CA;CASP3;XIAP;AKT1;PIK3R1;CCT4							Bone morphogenic protein (BMP) signaling and regulation WP1425	2021-03-12	0.367701	0.65369	1.52619	1.52693	SMAD4;RUNX2;BMPR1A
																											Cell-extracellular matrix interactions	2021-07-16	0.0149485	0.0632788	3.56509	14.9846	ITGB1;VASP;ILK;FLNA;FLNC;FERMT2;LIMS1							IL-10 Anti-inflammatory Signaling Pathway WP4495	2021-03-12	0.367701	0.65369	1.52619	1.52693	STAT1;STAT3;JAK1
																											Gap-filling DNA repair biosynthesis and ligation in global genomic nucleotide excision repair	2021-07-16	0.0149485	0.0632788	3.56509	14.9846	RFC3;PCNA;RFC1;RFC2;POLE2;POLD2;POLE							Iron metabolism in placenta WP2007	2021-03-12	0.367701	0.65369	1.52619	1.52693	TFRC;IREB2;MCOLN1
																											JNK (c-Jun kinases) phosphorylation and activation mediated by activated human TAK1	2021-07-16	0.0149485	0.0632788	3.56509	14.9846	MAPK10;MAPK9;RIPK2;TAB3;TAB2;MAP2K7;MAP3K7							MAPK and NFkB signaling pathways inhibited by Yersinia YopJ WP3849	2021-03-12	0.367701	0.65369	1.52619	1.52693	IKBKB;MAP3K1;CHUK
																											KIT signaling regulation	2021-07-16	0.0149485	0.0632788	3.56509	14.9846	LYN;YES1;KIT;CBL;SOCS6;SOS1;SH2B3							miRNA regulation of prostate cancer signaling pathways WP3981	1933-07-01	0.378396	0.670634	1.23279	1.19804	GSK3B;CDKN1A;CREBBP;PIK3CA;BAD;KRAS;SOS1
																											Rb tumor suppressor/checkpoint signaling in response to DNA damage	2021-07-16	0.0149485	0.0632788	3.56509	14.9846	CDKN1A;CDK4;CHEK1;CDK1;E2F1;ATM;CDC25A							Adipogenesis WP236	25/130	0.383828	0.678174	1.09045	1.04417	CDKN1A;SERPINE1;HIF1A;AGPAT2;ZMPSTE24;NAMPT;E2F1;E2F4;MEF2A;NCOA1;WNT5B;STAT1;STAT3;EBF1;HMGA1;KLF7;RBL1;CREB1;NCOR1;KLF5;SCD;TRIB3;PLIN2;IL6ST;LPIN2
																											Signaling events regulated by Ret tyrosine kinase	13/39	0.015217	0.0642184	2.29331	9.5983	GRB7;PTPN11;PIK3R1;PTK2;RAP1A;CREB1;PIK3CA;RASA1;SOS1;CRK;BCAR1;MAPK3;NCK1							Renin-angiotensin-aldosterone system (RAAS) WP4756	1944-09-01	0.389874	0.68675	1.17745	1.10908	ATF1;CREB3;CAMK2D;CREB1;GNAQ;ITPR2;CALM1;CREB5;ATF4
																											Basal transcription factors	1935-12-01	0.0153261	0.0642856	2.39279	9.99755	GTF2A1;TAF6L;TAF13;TAF10;GTF2H1;TAF5;TAF9B;GTF2H3;GTF2F2;TAF2;GTF2I;TAF1							Kisspeptin/kisspeptin receptor system in the ovary WP4871	1939-08-01	0.399568	0.699935	1.18163	1.08399	NRAS;PIK3CA;AKT2;AKT1;ARRB1;KRAS;PIK3CB;MAPK3
																											PIK3C1/AKT pathway	1935-12-01	0.0153261	0.0642856	2.39279	9.99755	GSK3B;CDKN1A;HSP90AA1;CHUK;PRKDC;BAD;AKT2;MLST8;AKT1;YWHAZ;YWHAG;KPNA1							22q11.2 copy number variation syndrome WP4657	25/131	0.399789	0.699935	1.0801	0.990252	SLC25A1;HDAC3;CUL3;SRF;MED15;RTN4;MALT1;CRKL;PPP1CB;CDC42;MRPL40;XPO1;DROSHA;SHOC2;TNPO1;PAK4;RANBP1;RANGAP1;NCOR1;THAP7;HIST1H4H;HIST1H4I;HIST1H4C;ASF1A;KPNB1
																											Signaling by interleukins	29/109	0.0155432	0.0649987	1.66463	6.93173	CUL1;PIK3R1;PIK3CB;CBL;CRKL;IKBKB;NRAS;MAP3K7;JAK1;MAPK3;LYN;YES1;CHUK;SYK;RIPK2;STAT1;STAT3;PTPN11;IRAK4;YWHAZ;IL5;PIK3CA;CDK1;TAB3;TAB2;KRAS;IL6ST;SOS1;CRK							Corticotropin-releasing hormone signaling pathway WP2355	18/93	0.401022	0.699966	1.09904	1.00423	GSK3B;PRKCI;HSP90AA1;ARRB1;BRAF;PTK2;MAPK9;GJA1;CREB1;TRIM28;CASP3;GNB2;GNAQ;GRK6;AKT1;TCF4;JUNB;MAPK3
																											Rho GTPase cycle	32/123	0.0159251	0.0663946	1.61507	6.68616	ARHGAP11B;FAM13B;ITSN1;GDI2;ARHGAP1;ARHGAP18;ARHGAP17;ARHGAP5;ARHGAP12;SYDE2;CDC42;FGD3;G3BP2;ECT2;VAV3;RALBP1;ARHGEF16;RHOG;ARHGEF18;MYO9B;ARAP1;RHOF;RHOC;MYO9A;RHOB;NET1;TIAM1;DEPDC1B;ARHGEF2;SOS1;SOS2;RHOQ							SARS-CoV-2 innate immunity evasion and cell-specific immune response WP5039	13/66	0.402611	0.700616	1.12317	1.02184	IFNAR2;HDAC2;STAT1;TANK;MAVS;TBK1;TP53I3;AP1G1;BSG;FADD;RAE1;JAK1;IFNAR1
																											Interleukin-2 receptor beta chain in T cell activation	16/52	0.0169771	0.0705676	2.03897	8.3106	PCNA;SYK;CCNH;BAD;PIK3R1;NMI;CBL;CRKL;CCND3;PIK3CA;RPS6KB1;E2F1;AKT1;SOS1;JAK1;MAPK3							MFAP5 effect on permeability and motility of endothelial cells via cytoskeleton rearrangement WP4560	2021-04-18	0.408148	0.703873	1.30813	1.17225	CREB1;LPP;PTK2;MAPK3
																											Dual incision reaction in GG-NER	2021-08-20	0.0172602	0.0713147	3.05608	12.4057	CDK7;CCNH;ERCC4;ERCC1;ERCC2;GTF2H1;GTF2H3;MNAT1							Proteoglycan biosynthesis WP4784	2021-04-18	0.408148	0.703873	1.30813	1.17225	SLC35B3;B3GAT3;IMPAD1;B4GALT7
																											N-glycan antennae elongation in the medial/trans-Golgi	2021-08-20	0.0172602	0.0713147	3.05608	12.4057	B4GALT2;B4GALT3;ST6GAL1;FUT8;MAN2A1;MGAT4B;MGAT3;MGAT2							Simplified Interaction Map Between LOXL4 and Oxidative Stress Pathway WP3670	2021-04-18	0.408148	0.703873	1.30813	1.17225	NRF1;ECSIT;SIRT1;NFE2L2
																											Activation of chaperones by IRE1 alpha	15/48	0.0177099	0.0727371	2.0851	8.41054	KLHDC3;ACADVL;HSPA5;FKBP14;WFS1;GOSR2;DDX11;GFPT1;YIF1A;DNAJC3;SERP1;DNAJB11;SSR1;HDGF;PREB							Nephrotic syndrome WP4758	1945-09-01	0.417535	0.713011	1.14467	0.999743	YARS;ANLN;CD151;TTC21B;MYH9;WDR73;COQ6;ZMPSTE24;CD2AP
																											Energy metabolism	15/48	0.0177099	0.0727371	2.0851	8.41054	MEF2A;NCOA1;GSK3B;MED1;PRKAA1;PRMT1;NRF1;TFB2M;PPRC1;SIRT1;CREB1;MYBBP1A;UCP2;TFAM;GABPA							Cell Differentiation - Index WP2029	2021-03-13	0.420456	0.713011	1.37349	1.19001	MEF2A;SRF;STAT3
																											Advanced glycosylation endproduct receptor signaling	2021-06-13	0.0179678	0.0731432	3.92825	15.7883	APP;CAPZA1;CAPZA2;HMGB1;DDOST;MAPK3							MFAP5-mediated ovarian cancer cell motility and invasiveness WP3301	2021-03-13	0.420456	0.713011	1.37349	1.19001	CREB1;PTK2;MAPK3
																											Downregulation of ERBB2-ERBB3 signaling	2021-06-13	0.0179678	0.0731432	3.92825	15.7883	AKT2;ERBB2;AKT1;RPS27A;UBA52;RNF41							NO metabolism in cystic fibrosis WP4947	2021-03-13	0.420456	0.713011	1.37349	1.19001	PRMT7;PRMT1;PRMT3
																											PIP biosynthesis at the early endosome membrane	2021-06-13	0.0179678	0.0731432	3.92825	15.7883	FIG4;PI4K2B;MTMR2;PIKFYVE;PIK3C2A;MTM1							Senescence and Autophagy in Cancer WP615	20/105	0.421552	0.713011	1.07743	0.930699	UVRAG;GSK3B;BECN1;SMAD4;CDKN1A;PCNA;KMT2A;IGFBP3;SERPINE1;HMGA1;BRAF;GABARAP;RSL1D1;ATG16L1;LAMP2;MLST8;E2F1;IL6ST;SLC39A3;ATG5
																											Meiosis	23/83	0.0181485	0.0736616	1.75948	7.05406	BLM;UBE2I;H2AFX;HIST1H2AJ;BRCA1;SMC3;SMC1A;TERF1;SYNE2;HIST2H2BE;MLH3;REC8;RAD50;STAG1;HIST1H3A;RAD51;CDK4;RAD21;POT1;ATM;NBN;HIST1H2BC;ATR							Cannabinoid receptor signaling WP3869	2021-06-29	0.422112	0.713011	1.19439	1.03014	MAPK10;MAPK9;DAGLA;CNR2;PRKAR1A;MAPK3
																											Valine, leucine and isoleucine degradation	14/44	0.0183749	0.0743618	2.1405	8.55508	BCKDHA;ECHS1;MCCC1;HSD17B10;ACADSB;MUT;ALDH3A2;ALDH2;DBT;ACADM;BCAT1;DLD;HIBCH;BCAT2							T-Cell Receptor and Co-stimulatory Signaling WP2583	2021-06-29	0.422112	0.713011	1.19439	1.03014	GSK3B;CSNK1A1;RASA1;DYRK1A;AKT1;CALM1
																											Cytosolic tRNA aminoacylation	2021-09-24	0.0186216	0.0749206	2.75074	10.9574	YARS;NARS;DARS;VARS;LARS;RARS;TARS;GARS;EPRS							Neural Crest Cell Migration during Development WP4564	1940-08-01	0.429077	0.714971	1.14463	0.968496	TIAM1;PIK3CA;AKT2;STAT3;AKT1;PIK3CB;PAK2;PAK4
																											Inhibition of cellular proliferation by Gleevec	2021-09-24	0.0186216	0.0749206	2.75074	10.9574	MAP3K1;PIK3CA;BAD;STAT1;AKT1;PIK3R1;SOS1;CRKL;MAPK3							Canonical NF-KB pathway WP4562	2021-02-08	0.434487	0.714971	1.52604	1.27209	IKBKB;CHUK
																											Pyruvate metabolism and citric acid (TCA) cycle	13/40	0.0189322	0.0759489	2.20824	8.75984	PDHX;PDHA1;SLC16A1;IDH1;SDHD;PDP1;SUCLA2;NNT;BSG;IDH3B;SUCLG2;SUCLG1;DLD							HIF1A and PPARG regulation of glycolysis WP2456	2021-02-08	0.434487	0.714971	1.52604	1.27209	TPI1;HIF1A
																											Signaling events mediated by VEGFR1 and VEGFR2	20/70	0.0190663	0.0762653	1.83556	7.2685	HSP90AA1;PRKAA1;ROCK1;BRAF;PTPN11;IQGAP1;PIK3R1;SHB;CBL;PTK2;DNM2;CAMKK2;CDC42;PIK3CA;CTNNA1;AKT1;PAK2;PTPN2;NCK1;MAPK3							Insulin signaling in adipocytes (diabetic condition) WP3635	2021-02-08	0.434487	0.714971	1.52604	1.27209	RPS6KB1;AKT2
																											Nef in HIV-1 replication and disease pathogenesis	2021-10-28	0.0192962	0.07674	2.54723	10.0561	AP1G1;AP2S1;AP1B1;ELMO1;AP1S1;AP2A1;DOCK2;B2M;PAK2;AP2M1							Insulin signaling in adipocytes (normal condition) WP3634	2021-02-08	0.434487	0.714971	1.52604	1.27209	RPS6KB1;AKT2
																											PKB-mediated events	2021-10-28	0.0192962	0.07674	2.54723	10.0561	PPM1A;PRKAA1;CAB39;RPS6KB1;STRADA;RHEB;AKT2;EIF4EBP1;MLST8;EIF4E							Ketogenesis and Ketolysis WP4742	2021-02-08	0.434487	0.714971	1.52604	1.27209	SLC16A1;UCP2
																											p73 transcription factor network	22/79	0.0194168	0.0769976	1.77139	6.98213	YAP1;PLK3;CDKN1A;SERPINE1;AEN;UBE4B;FBXO45;SIRT1;CCNA2;ITCH;CDK6;RAD51;TP53I3;CHEK1;CDK1;FLOT2;NDUFS2;BAX;PIN1;BAK1;PFDN5;JAK1							Mitochondrial CII Assembly WP4920	2021-02-08	0.434487	0.714971	1.52604	1.27209	SDHAF2;SDHD
																											Semaphorin interactions	19/66	0.0202967	0.0802563	1.85491	7.22912	ITGB1;SEMA5A;GSK3B;HSP90AA1;ROCK1;ROCK2;LIMK1;RHOG;RHOC;RHOB;CDC42;MYL6;DPYSL2;DPYSL3;ERBB2;MYH9;MYH10;PAK2;PLXNA4							Photodynamic therapy-induced NFE2L2 (NRF2) survival signaling WP3612	2021-05-24	0.435685	0.714971	1.20482	1.00101	ABCC4;GCLC;KEAP1;GCLM;NFE2L2
																											PI3K pathway	16/53	0.0203755	0.0803379	1.98374	7.72353	GSK3B;PRKCI;BAD;PIK3R1;NRAS;PIKFYVE;PIK3CA;RPS6KB1;RPS6KC1;AKT2;RPS6KA1;RPS6KB2;AKT1;KRAS;SOS1;SOS2							Sphingolipid Metabolism (general overview) WP4725	2021-05-24	0.435685	0.714971	1.20482	1.00101	ASAH1;SPTLC1;SPHK2;SPHK1;KDSR
																											CXCR4 signaling pathway	30/116	0.0207128	0.0807666	1.60175	6.20998	ITGB1;VPS4B;VPS4A;GNAI3;PIK3R1;PIK3CB;CDC42;GNA13;ADRBK1;GRK6;MLST8;UBQLN1;AKT1;CSK;MAPK3;LYN;YES1;BAD;STAT1;LIMK1;STAT3;PTPN11;RHOC;PTK2;RHOB;ITCH;PIK3CA;GNAQ;CRK;BCAR1							Urea cycle and associated pathways WP4595	2021-05-24	0.435685	0.714971	1.20482	1.00101	CPS1;PYCR1;ASL;SLC25A13;OTC
																											DCC role in regulating apoptosis	2021-05-10	0.0209525	0.0807666	4.58224	17.7126	DCC;MAGED1;UNC5B;CASP3;APPL1							Apoptosis Modulation by HSP70 WP384	2021-04-19	0.451698	0.737049	1.22084	0.970256	MAPK10;MAP3K1;CASP3;FADD
																											Fanconi anemia pathway regulation	2021-05-10	0.0209525	0.0807666	4.58224	17.7126	USP1;ATM;RPS27A;UBA52;ATR							TP53 network WP1742	2021-04-19	0.451698	0.737049	1.22084	0.970256	CDKN1A;SUMO1;BAX;ATM
																											Gap junction degradation	2021-05-10	0.0209525	0.0807666	4.58224	17.7126	GJA1;CLTC;CLTB;AP2M1;DNM2							One-carbon metabolism WP241	2021-06-30	0.456538	0.742842	1.14455	0.897425	MTRR;AHCY;MTHFD1L;MTR;MAT2B;GART
																											IRAK2-mediated activation of TAK1 complex	2021-05-10	0.0209525	0.0807666	4.58224	17.7126	TAB3;TAB2;RPS27A;MAP3K7;UBA52							Nucleotide-binding Oligomerization Domain (NOD) pathway WP1433	1941-08-01	0.458433	0.743824	1.10988	0.86564	PYCARD;IKBKB;NDUFA13;HSP90AA1;CHUK;RIPK2;XIAP;PRDM1
																											Interferon-alpha signaling pathway	2021-05-10	0.0209525	0.0807666	4.58224	17.7126	IFNAR2;STAT1;IRF9;IFNAR1;JAK1							H19 action Rb-E2F1 signaling and CDK-Beta-catenin activity WP3969	2021-03-14	0.471627	0.760945	1.24855	0.938367	MED1;CDK4;E2F1
																											PIP biosynthesis at the late endosome membrane	2021-05-10	0.0209525	0.0807666	4.58224	17.7126	FIG4;MTMR2;PIKFYVE;PIK3C2A;MTM1							Omega-3/Omega-6 FA synthesis WP4723	2021-03-14	0.471627	0.760945	1.24855	0.938367	ELOVL5;ACSL3;ACOX3
																											Ran role in mitotic spindle regulation	2021-05-10	0.0209525	0.0807666	4.58224	17.7126	RANBP1;NUMA1;RANGAP1;KPNB1;KIF15							Sphingolipid Metabolism (integrated pathway) WP4726	2021-05-25	0.47355	0.761913	1.14451	0.855521	ASAH1;SPTLC1;SPHK2;SPHK1;KDSR
																											Destabilization of mRNA by KSRP	2021-07-17	0.02155	0.0827191	3.20838	12.3118	EXOSC5;DIS3;PARN;AKT1;YWHAZ;EXOSC2;EXOSC1							Thermogenesis WP4321	20/108	0.475752	0.763324	1.04051	0.77295	SMARCD1;PRKAA1;SMARCD2;SMARCB1;ACSL3;ARID1B;ACTB;CREB3;NRAS;CREB1;RPS6KB1;RHEB;RPS6KA1;RPS6KB2;MLST8;KRAS;SOS1;SOS2;PRKG1;CREB5
																											Circadian rhythm	18/62	0.0215789	0.0827191	1.87691	7.1999	NCOA1;MED1;CREBBP;HDAC3;CHD9;NCOA6;NCOA3;SERPINE1;CUL1;HIF1A;CREB1;NCOR1;TBL1XR1;TGS1;NAMPT;FBXL3;RPS27A;UBA52							Fas ligand pathway and stress induction of heat shock proteins WP314	1942-08-01	0.487488	0.77998	1.07717	0.773937	MAP3K1;PRKDC;RIPK2;CASP3;FADD;PAK2;MAP3K7;ACTB
																											Deposition of new CENP-A-containing nucleosomes at the centromere	14/45	0.0223864	0.0853403	2.07133	7.86959	CENPU;NPM1;H2AFX;HIST1H2AJ;SMARCA5;CASC5;RSF1;HIST2H2BE;RBBP4;MIS18BP1;CENPK;CENPQ;ITGB3BP;HIST1H2BC							Folate-Alcohol and Cancer Pathway Hypotheses WP1589	2021-02-09	0.499	0.789627	1.30796	0.909224	CREB1;MTR
																											Interleukin-3, interleukin-5, and GM-CSF signaling	14/45	0.0223864	0.0853403	2.07133	7.86959	LYN;YES1;SYK;PTPN11;PIK3CB;PIK3R1;CBL;YWHAZ;CRKL;IL5;PIK3CA;SOS1;CRK;JAK1							Role of Altered Glycolysation of MUC1 in Tumour Microenvironment WP4480	2021-02-09	0.499	0.789627	1.30796	0.909224	IKBKB;CHUK
																											Acetylcholine biosynthesis	2021-04-07	0.0227923	0.0864103	6.10869	23.099	PDHA2;PCYT1A;PDHA1;PEMT							Tgif disruption of Shh signaling WP3674	2021-02-09	0.499	0.789627	1.30796	0.909224	SMAD2;TGIF2
																											Endothelial NOS activation	2021-04-07	0.0227923	0.0864103	6.10869	23.099	HSP90AA1;AKT1;ZDHHC21;CALM1							Thiamine metabolic pathways WP4297	2021-02-09	0.499	0.789627	1.30796	0.909224	BCKDHA;PDHA1
																											Plasma membrane estrogen receptor signaling	13/41	0.0232896	0.0880537	2.12924	8.00542	ROCK2;GNAI3;PIK3R1;GNA13;NRAS;PIK3CA;GNAQ;AKT1;KRAS;STRN;SOS1;BCAR1;PELP1							IL-18 signaling pathway WP4754	49/272	0.510494	0.803482	1.00584	0.676305	PYGB;GSK3B;PHF20;HSPB8;MUM1;ENO1;IKBKB;CASP3;BSG;LONP2;B2M;MAP3K7;TGM2;MEF2A;USP5;CHUK;IMP3;BAZ1B;RANGAP1;RUNX2;ARFGAP2;CCNA2;ALS2;RFX5;GRN;PRKAA1;NRN1;TOMM40;HDAC3;TNFRSF11B;PIK3R1;CENPB;RXRB;MAPK9;SPP1;TRPM7;FADD;MAP2K7;RAE1;UGGT1;MAPK3;ZNF143;BAD;NCAPH2;DEK;RPS6KB1;NACA;BAX;HDGF
																											Inactivation of APC/C via direct inhibition of the APC/C complex	2021-08-21	0.0235924	0.0889551	2.82083	10.5692	FZR1;CDC23;UBE2C;CDC27;UBE2D1;ANAPC10;ANAPC1;ANAPC11							Glucuronidation WP698	2021-05-26	0.510546	0.803482	1.08995	0.732743	UGDH;UGP2;PGM3;PGM1;HK1
																											TGF-beta regulation of skeletal system development	23/85	0.0238875	0.0898221	1.70252	6.35788	ACVR1;SMAD2;CREBBP;SMAD4;ROCK1;ZFYVE9;ROCK2;CUL1;SMAD9;SMAD5;TGFBR1;PPP2CA;RBL1;ZFYVE16;PPP2R1B;RPS6KB1;PPP2R1A;ID2;ID1;RPS6KB2;E2F4;MAPK3;BMPR1A							ESC Pluripotency Pathways WP3931	21/116	0.518639	0.813995	1.01188	0.664348	ACVR1;GSK3B;ACTR2;SMAD4;WNT5B;STAT3;ARAF;SMAD9;BRAF;PTPN11;FGF2;SMAD5;LRP6;APC;AKT2;AKT1;IL6ST;SOS1;MAPK6;BMPR1A;JAK1
																											RANKL signaling pathway	16/54	0.0242671	0.0908029	1.93142	7.18223	LYN;CHUK;SYK;TNFRSF11B;PIK3R1;CBL;PTK2;IKBKB;CDC42;MAPK9;AKT2;AKT1;TAB2;MAP2K7;MAP3K7;MAPK3							mBDNF and proBDNF regulation of GABA neurotransmission WP4829	1938-07-01	0.534606	0.836775	1.03364	0.647289	CREB1;ROCK1;PIK3CA;STAT3;AP2A1;PIK3R1;PIK3CB
																											C-Myc pathway	2021-09-25	0.0245743	0.0908029	2.57866	9.55667	PPP2CA;GSK3B;RUVBL2;TAF10;PIN1;HBP1;SKP2;PAK2;SUPT7L							Modulators of TCR signaling and T cell activation WP5072	1961-11-01	0.544021	0.843816	1.00702	0.613038	IKBKB;GNA13;TMEM222;FIBP;SMARCB1;CHUK;AKT1;PIK3R1;DGKZ;SH2B3;MALT1
																											IGF1 receptor signaling through beta-arrestin	2021-09-25	0.0245743	0.0908029	2.57866	9.55667	PPP2CA;MAPK10;MAPK9;PIK3CA;AKT2;AKT1;ARRB1;MAPK6;MAPK3							Regulatory circuits of the STAT3 signaling pathway WP4538	14/78	0.544673	0.843816	1.00128	0.608346	IFNAR2;CREBBP;IFNGR1;IL11RA;STAT3;MAPK10;MAPK9;TRIM28;MLST8;IL6ST;MAPK6;JAK1;IFNAR1;MAPK3
																											Fluoropyrimidine activity	1933-11-01	0.0246089	0.0908029	2.29259	8.49323	SMUG1;ABCC4;RRM1;PPAT;FPGS;XRCC3;ERCC2;GGH;TK1;UPP1;SLC29A1							1q21.1 copy number variation syndrome WP4905	2021-05-27	0.54643	0.843816	1.04034	0.628728	PYGO1;PRKAA1;GJA1;OCLN;F11R
																											Glycoprotein VI-mediated activation cascade	1933-11-01	0.0246089	0.0908029	2.29259	8.49323	CDC42;LYN;VAV3;SYK;PIK3CA;AKT2;RHOG;AKT1;PIK3CB;PIK3R1;RHOB							Eicosanoid Synthesis WP167	2021-05-27	0.54643	0.843816	1.04034	0.628728	PTGES2;PNPLA8;LTA4H;GGT1;PTGES
																											Negative regulators of RIG-I/MDA5 signaling	1933-11-01	0.0246089	0.0908029	2.29259	8.49323	ITCH;MAVS;TBK1;RNF125;TAX1BP1;UBE2D1;PIN1;RPS27A;UBA52;UBE2K;ATG5							Intraflagellar transport proteins binding to dynein WP4532	2021-05-27	0.54643	0.843816	1.04034	0.628728	DYNC1I2;DYNC1H1;DYNC1LI1;DYNC1LI2;DYNLRB1
																											Propanoate metabolism	1933-11-01	0.0246089	0.0908029	2.29259	8.49323	ALDH3A2;ACSS2;ECHS1;SUCLA2;ALDH2;SUCLG2;SUCLG1;ACADM;MLYCD;MUT;HIBCH							Apoptosis WP254	15/84	0.551687	0.846668	0.995032	0.591821	HELLS;MAP3K1;CHUK;SCAF11;BAD;XIAP;PIK3R1;IKBKB;MAPK10;CASP3;AKT1;BAX;FADD;BAK1;TNFRSF21
																											Influence of Ras and Rho proteins on G1 to S transition	2021-10-29	0.0248352	0.0911503	2.41302	8.91729	IKBKB;CDKN1A;CDK6;CHUK;PIK3CA;CDK4;E2F1;AKT1;PIK3R1;MAPK3							Disruption of postsynaptic signaling by CNV WP4875	1933-06-01	0.555894	0.846668	1.01719	0.597274	CAMK2D;DLG1;HOMER1;FMR1;YWHAG;MAPK3
																											Transferrin endocytosis and recycling	2021-10-29	0.0248352	0.0911503	2.41302	8.91729	ATP6V1A;ATP6V0B;ATP6V1G1;ATP6V0E1;TFRC;ATP6V1B2;MCOLN1;ATP6V1D;ATP6V1C1;ATP6V1F							Aspirin and miRNAs WP4707	2021-02-10	0.558565	0.846668	1.14439	0.666475	ABCC4;MVD
																											Phosphatidylinositol metabolism	15/50	0.0256458	0.093876	1.96572	7.20115	PI4K2B;MTMR2;MTMR14;PITPNB;SACM1L;PIK3CB;PIK3R1;PIK3C2A;MTMR6;MTM1;FIG4;PIKFYVE;PIK3CA;INPP5K;PI4KB							Degradation pathway of sphingolipids, including diseases WP4153	2021-02-10	0.558565	0.846668	1.14439	0.666475	HEXB;HEXA
																											AKT phosphorylation of cytosolic targets	2021-06-14	0.026757	0.0966615	3.43701	12.4453	GSK3B;CDKN1A;CHUK;BAD;AKT2;AKT1							Leptin and adiponectin WP3934	2021-02-10	0.558565	0.846668	1.14439	0.666475	PRKAA1;ADIPOR2
																											DCC-mediated attractive signaling	2021-06-14	0.026757	0.0966615	3.43701	12.4453	CDC42;DCC;WASL;DOCK1;PTK2;NCK1							Steroid Biosynthesis WP496	2021-02-10	0.558565	0.846668	1.14439	0.666475	HSD17B1;HSD17B4
																											Glycogen breakdown (glycogenolysis)	2021-06-14	0.026757	0.0966615	3.43701	12.4453	PYGB;AGL;PHKB;CALM1;PHKA2;PGM1							Vitamin D Metabolism WP1531	2021-02-10	0.558565	0.846668	1.14439	0.666475	RXRB;DHCR7
																											Leading strand biosynthesis	2021-06-14	0.026757	0.0966615	3.43701	12.4453	POLA1;RFC3;PCNA;RFC1;RFC2;POLD2							Deregulation of Rab and Rab Effector Genes in Bladder Cancer WP2291	2021-03-16	0.567022	0.857231	1.05633	0.599318	RAB27B;GCC2;EXPH5
																											Non-homologous end-joining (NHEJ) pathway	2021-06-14	0.026757	0.0966615	3.43701	12.4453	FEN1;RAD50;XRCC4;PRKDC;XRCC5;LIG4							Notch Signaling WP268	1945-08-01	0.57153	0.861548	0.989651	0.553649	HDAC2;CREBBP;ADAM17;CTBP2;INPP5K;DTX2;RFNG;RBPJ
																											Telomere maintenance	17/59	0.0269553	0.0971234	1.85676	6.70953	FEN1;RFC3;PCNA;RFC1;RFC2;H2AFX;HIST1H2AJ;TERF1;HIST2H2BE;POLA1;RUVBL2;POLE2;POLD2;NHP2;POT1;POLE;HIST1H2BC							PI3K/AKT/mTOR - VitD3 signaling WP4141	2021-04-22	0.574365	0.861548	1.01718	0.564019	GSK3B;PDHA1;PIK3CA;AKT1
																											Integrin-mediated cell adhesion	26/100	0.0279033	0.100278	1.61266	5.77174	ITGB1;ITGAM;ITGB5;ROCK1;ROCK2;ARAF;ILK;CDC42;RAP1A;CAPN7;AKT2;AKT1;CSK;CAPN1;MAPK6;PAK2;PAK4;VASP;VAV3;BRAF;PTK2;MAPK10;SOS1;CRK;DOCK1;BCAR1							Vitamin D in inflammatory diseases WP4482	2021-04-22	0.574365	0.861548	1.01718	0.564019	IKBKB;SMAD4;MAP3K1;CHUK
																											Signaling by NOTCH	30/119	0.0289026	0.103599	1.54747	5.48397	HDAC2;HDAC3;SEL1L;CUL1;ATP2A2;CCNC;DTX2;ARRB1;FURIN;RFNG;RBPJ;HIF1A;HDAC6;E2F1;TMED2;ST3GAL6;RAB6A;RPS27A;PSENEN;CREBBP;ADAM10;MIB1;ADAM17;ITCH;SNW1;NCOR1;TBL1XR1;UBA52;TNRC6A;TNRC6B							p38 MAPK Signaling Pathway WP400	1934-06-01	0.58711	0.878377	0.980806	0.522322	CDC42;MAP3K1;CREB1;STAT1;MAP3K7;TGFBR1
																											Validated nuclear estrogen receptor alpha network	18/64	0.0294617	0.105018	1.79509	6.32708	NCOA1;MED1;SMAD4;PCNA;CHUK;MPG;LMO4;NCOA3;AP1B1;SRA1;BRCA1;NCOR1;UBA3;NCOA7;TRIM59;NDUFV3;CTSD;EBAG9							Epithelial to mesenchymal transition in colorectal cancer WP4239	28/160	0.589021	0.878954	0.970702	0.513786	GSK3B;PIK3R1;PIK3CB;RBPJ;NR2C2;HIF1A;LRP6;RBBP4;AKT2;AKT1;MAPK3;SMAD2;SUZ12;SMAD4;WNT5B;NUBPL;MPP5;TGFBR1;OCLN;FMNL2;PIK3CA;ID2;ID1;STRAP;KRAS;SOS1;SOS2;EZH2
																											BMAL1-CLOCK/NPAS2 activates circadian expression	1938-12-01	0.0295822	0.105018	2.11631	7.45065	NCOA1;MED1;CREBBP;HDAC3;NCOR1;CHD9;NCOA6;TBL1XR1;TGS1;NCOA3;SERPINE1;NAMPT							Ciliopathies WP4803	32/183	0.592767	0.882258	0.969742	0.50713	GALNT11;ARL3;CEP120;CCDC28B;ARL13B;CSPP1;TTC21B;RAB23;POC1A;BBS7;RAB28;IFT57;PIBF1;BBS5;CEP78;PLK4;NEK8;DNAH11;MKKS;USP9X;POMGNT1;ICK;AHI1;CENPF;TTLL5;KIAA0586;TMEM216;XPNPEP3;UNC119;CEP41;ATXN10;CLUAP1
																											Trefoil factor initiation of mucosal healing	1938-12-01	0.0295822	0.105018	2.11631	7.45065	ITGB1;IKBKB;CHUK;PIK3CA;BAD;CASP3;ERBB2;RPS6KA1;AKT1;PIK3R1;SOS1;MAPK3							Folate Metabolism WP176	1969-12-01	0.59568	0.884309	0.963508	0.499147	ABCA1;MTRR;GPX1;AHCY;GPX4;FLAD1;RFK;SERPINE1;CAT;MTR;GART;SLC19A1
																											Signaling by NOTCH1	20/73	0.0296029	0.105018	1.73134	6.09412	PSENEN;HDAC2;CREBBP;HDAC3;CUL1;ADAM10;ARRB1;CCNC;DTX2;RBPJ;HIF1A;HDAC6;MIB1;ADAM17;ITCH;NCOR1;SNW1;TBL1XR1;RPS27A;UBA52							Aryl Hydrocarbon Receptor Netpath WP2586	1946-08-01	0.598137	0.885673	0.963549	0.495203	CDKN1A;NRAS;HSP90AA1;GCLC;E2F1;NCOA7;KRAS;NFE2L2
																											Pre-NOTCH processing in Golgi	2021-07-18	0.0299251	0.105618	2.91653	10.2343	SEL1L;ATP2A2;TMED2;FURIN;ST3GAL6;RFNG;RAB6A							Pathways Regulating Hippo Signaling WP4540	17/98	0.601204	0.887932	0.960469	0.488707	SMAD2;TEAD4;PRKCI;PRKAA1;GNAI3;TAZ;STK3;CDC42;PRKD3;PRKAR1A;GNAQ;KIT;CDH12;NF2;TEAD1;TEAD2;EPHA2
																											Serotonin receptor 4/6/7 and NR3C signaling	2021-07-18	0.0299251	0.105618	2.91653	10.2343	ATF1;ELK4;CREB1;RAP1A;SRF;BRAF;MAPK3							Leptin Insulin Overlap WP3935	2021-03-17	0.610542	0.893242	0.980822	0.483946	STAT3;AKT1;DGKZ
																											Glutathione metabolism	15/51	0.030485	0.107046	1.911	6.67037	GSTM4;RRM1;GPX1;GPX4;GSTO1;MGST3;GSS;IDH1;MGST1;GGCT;GSTZ1;GCLC;RRM2B;GGT1;GCLM							Cancer immunotherapy by PD-1 blockade WP4585	2021-04-23	0.611655	0.893242	0.96359	0.473689	NFAT5;STAT3;NFATC3;PTPN11
																											Metabolism of vitamins and cofactors	15/51	0.030485	0.107046	1.911	6.67037	PANK4;PDXK;PANK3;GSTO1;NMNAT2;NADSYN1;THTPA;FLAD1;RFK;FPGS;NAMPT;ENPP1;SLC25A32;AASDHPPT;SLC19A1							Ebstein-Barr virus LMP1 signaling WP262	2021-04-23	0.611655	0.893242	0.96359	0.473689	IKBKB;HSP90AA1;CHUK;MAP3K7
																											Cell-cell communication	32/129	0.0305911	0.107146	1.51461	5.28152	ITGB1;CD151;CTNND1;ILK;IQGAP1;PIK3R1;PIK3CB;WASL;F11R;PVR;MLLT4;CTNNA1;FLNA;FLNC;SPTBN1;NCK1;VASP;PRKCI;CADM1;DST;DCC;CASK;PTPN11;MPP5;INADL;PTK2;CD2AP;PIK3CA;CDH12;FERMT2;PLEC;LIMS1							Nanoparticle triggered autophagic cell death WP2509	2021-04-23	0.611655	0.893242	0.96359	0.473689	BECN1;UVRAG;ATG16L1;ATG5
																											AKT signaling pathway	2021-08-22	0.0313897	0.108973	2.61918	9.06571	IKBKB;PPP2CA;HSP90AA1;CHUK;PIK3CA;BAD;AKT1;PIK3R1							Autosomal recessive Osteopetrosis pathways WP4788	2021-02-11	0.612883	0.893242	1.01718	0.49799	IKBKB;OSTM1
																											RNA polymerase II promoter escape	2021-08-22	0.0313897	0.108973	2.61918	9.06571	GTF2A1;TAF13;TAF10;ERCC2;GTF2H1;TAF5;GTF2H3;TAF1							Eicosanoid metabolism via lipooxygenases (LOX) WP4721	2021-05-29	0.614104	0.893242	0.953528	0.464932	TRPA1;LTA4H;ACOX3;PTGR1;PTGR2
																											PDGFA signaling pathway	2021-10-30	0.0314285	0.108973	2.29223	7.93119	MAP3K1;PIK3CA;STAT1;SRF;RASA1;STAT3;PIK3R1;SOS1;JAK1;MAPK3							Fibrin Complement Receptor 3 Signaling Pathway WP4136	1941-07-01	0.62046	0.897952	0.942261	0.449736	IKBKB;ITGAM;SYK;CHUK;PIK3CA;AKT1;IRAK4
																											Signaling by FGFR1 mutants	2021-10-30	0.0314285	0.108973	2.29223	7.93119	ZMYM2;CPSF6;PIK3CA;STAT1;FGFR1OP2;STAT3;TRIM24;FGFR1OP;PIK3R1;FGF2							Vitamin D-sensitive calcium signaling in depression WP4698	1941-07-01	0.62046	0.897952	0.942261	0.449736	GCLC;GPX4;ATP2B4;ITPR2;ATP2B1;GGT1;NFE2L2
																											CARM1 and regulation of the estrogen receptor	2021-09-26	0.0317606	0.109301	2.42683	8.37141	GTF2A1;MED1;HDAC2;CREBBP;HDAC3;SRA1;BRCA1;HDAC6;PELP1							Linoleic acid metabolism known to be affected by coronavirus infection WP4853	2021-01-05	0.627715	0.901656	1.14435	0.532889	ELOVL5
																											Ras signaling pathway	2021-09-26	0.0317606	0.109301	2.42683	8.37141	CDC42;RALBP1;CHUK;PIK3CA;BAD;AKT1;PIK3R1;SOS1;MAPK3							SARS-CoV-2 altering angiogenesis via NRP1 WP5065	2021-01-05	0.627715	0.901656	1.14435	0.532889	FURIN
																											TGF-beta signaling in development	2021-09-26	0.0317606	0.109301	2.42683	8.37141	ACVR1;SMAD2;SMAD4;SMAD9;SMAD5;TDGF1;SPTBN1;TGFBR1;BMPR1A							Vitamin B6-dependent and responsive disorders WP4228	2021-01-05	0.627715	0.901656	1.14435	0.532889	AASS
																											CDC6 association with the ORC-origin complex	2021-05-11	0.0328323	0.111873	3.8183	13.0446	ORC4;MCM8;ORC3;ORC2;E2F1							LncRNA involvement in canonical Wnt signaling and colorectal cancer WP4258	16/94	0.632872	0.906478	0.938648	0.42942	GSK3B;WNT5B;CTBP2;CSNK1A1;RYK;CHD8;SENP2;NLK;LRP6;CCND3;FRAT2;CDK6;HNRNPK;APC;MAP3K7;EZH2
																											Mammalian target of rapamycin complex 1 (mTORC1)-mediated signaling	2021-05-11	0.0328323	0.111873	3.8183	13.0446	RPS6KB1;RHEB;EIF4EBP1;MLST8;EIF4E							Male infertility WP4673	25/146	0.63422	0.906478	0.945331	0.430465	MTRR;CCNT2;DDX20;UBR2;MTR;CREBBP;GPX1;XRCC4;RFC1;XRCC5;XRCC3;HMGA1;LIG4;CDC42BPA;REC8;MLH3;PUM2;DAZL;CDK9;ERCC1;CAT;ERCC2;PEMT;ATM;NFE2L2
																											SUMOylation as a mechanism to modulate CtBP-dependent gene responses	2021-05-11	0.0328323	0.111873	3.8183	13.0446	UBE2I;SUMO1;UBA2;UBA1;UBE3A							Cell migration and invasion through p75NTR WP4561	2021-05-30	0.645617	0.91326	0.915331	0.400502	TIAM1;KIDINS220;AKT2;STAT3;AKT1
																											eIF2 regulation	2021-05-11	0.0328323	0.111873	3.8183	13.0446	GSK3B;EIF5;EIF2AK3;EIF2AK4;EIF2S2							Eicosanoid metabolism via cyclooxygenases (COX) WP4719	2021-05-30	0.645617	0.91326	0.915331	0.400502	AKR1B1;ACOX3;PTGR1;PTGR2;PTGES
																											Factors involved in megakaryocyte development and platelet production	31/125	0.0330012	0.112171	1.51396	5.16444	DOCK6;HDAC2;DOCK7;JMJD1C;KIF11;KIF15;DOCK10;CDC42;KLC3;HIST1H3A;SIN3A;KIF5B;MFN1;MFN2;KIFAP3;SH2B3;CREBBP;KIF23;KIF22;CENPE;PRKAR1A;KIFC1;CAPZA1;MAFF;CAPZA2;MAFK;VPS45;ZFPM2;DOCK2;RAB5A;DOCK1							Kallmann's Syndrome WP5074	2021-04-24	0.646849	0.91326	0.915355	0.398768	PIK3CA;TMEM98;AKT1;PTPN11
																											Glioma	18/65	0.0341264	0.115711	1.75679	5.93387	CDKN1A;CAMK2D;ARAF;BRAF;PIK3CB;PIK3R1;NRAS;CDK6;PIK3CA;CDK4;AKT2;E2F1;AKT1;KRAS;SOS1;CALM1;SOS2;MAPK3							Unfolded protein response WP4925	2021-04-24	0.646849	0.91326	0.915355	0.398768	HSPA5;EIF2AK3;NFE2L2;ATF4
																											Notch signaling pathway	30/121	0.0356131	0.120456	1.51328	5.04684	GSK3B;CDKN1A;HDAC2;CTBP2;CUL1;CCNC;DTX2;FURIN;ENO1;PIK3R1;RFNG;RBPJ;CBL;HIF1A;AKT1;INPP5K;CIR1;SKP2;EPS15;PSENEN;CREBBP;CR2;CNTN6;STAT3;ADAM10;MIB1;ADAM17;ITCH;SNW1;NCOR1							Osteoblast differentiation WP4787	20/118	0.646892	0.91326	0.933762	0.406724	PRKCI;SMAD4;WNT5B;PRKDC;STAT1;SMAD9;PIK3R1;PIK3CB;RBPJ;PIK3C2A;FGF2;SMAD5;RUNX2;LRP6;MAPK10;MAPK9;PIK3CA;MAPK6;BMPR1A;MAPK3
																											Tricarboxylic acid (TCA) cycle	1939-12-01	0.0359667	0.121355	2.0378	6.77603	PDP1;PDHX;PDHA2;PDHA1;SUCLA2;NNT;IDH1;IDH3B;SUCLG2;SUCLG1;SDHD;DLD							Fatty acid transporters WP5061	2021-03-18	0.651021	0.916841	0.915378	0.392893	FABP5;ACSL3;SLC27A4
																											Interleukin-7 signaling pathway	1935-11-01	0.0376686	0.1266	2.10128	6.88995	GSK3B;CREBBP;PIK3CA;BAD;STAT1;STAT3;AKT1;PIK3R1;NMI;JAK1;MAPK3							Alanine and aspartate metabolism WP106	2021-02-12	0.661919	0.927653	0.915402	0.377705	DARS;ASL
																											ATR activation in response to replication stress	2021-06-15	0.0379801	0.1266	3.05493	9.99175	RFC3;RFC2;CHEK1;HUS1;CLSPN;CDC25A							Bile acids synthesis and enterohepatic circulation WP4389	2021-02-12	0.661919	0.927653	0.915402	0.377705	FXR1;MAPK3
																											BMP signaling pathway in stem cells	2021-06-15	0.0379801	0.1266	3.05493	9.99175	ACVR1;SMAD4;MAGED1;SMAD9;SMAD5;BMPR1A							TYROBP causal network in microglia WP3945	1961-10-01	0.674295	0.932462	0.897212	0.35358	PYCARD;ABCC4;ITGAM;GPX1;FKBP15;RPS6KA1;SPP1;CAPG;SH2B3;TGFBR1
																											Mechanisms of transcriptional repression by DNA methylation	2021-06-15	0.0379801	0.1266	3.05493	9.99175	MBD3;HDAC2;RBBP4;SIN3A;MBD2;MTA2							PPAR signaling pathway WP3942	1967-11-01	0.675633	0.932462	0.898791	0.352421	RXRB;SCP2;FABP5;SCD;ILK;OLR1;ACADM;ACSL3;ACOX3;SLC27A5;SLC27A4
																											Spliceosomal assembly	2021-06-15	0.0379801	0.1266	3.05493	9.99175	SNRPD2;SNRPG;SNRPE;SNRPD3;SNRPC;SNRPB							MTHFR deficiency WP4288	2021-04-25	0.679858	0.932462	0.871713	0.336369	PCYT1A;EHMT2;CASP3;PEMT
																											Post-translational regulation of adherens junction stability and disassembly	14/48	0.0383329	0.127469	1.88822	6.15831	CREBBP;CTNND1;ADAM10;IQGAP1;ZBTB33;ROBO1;DNM2;CDC42;GNA13;TIAM1;CASP3;CTNNA1;RAB5A;RIN2							Physiological and pathological hypertrophy of the heart WP1528	2021-04-25	0.679858	0.932462	0.871713	0.336369	CAMK2D;STAT3;IL6ST;CALM1
																											CD28 co-stimulation	2021-10-31	0.0391609	0.128381	2.18294	7.07289	CDC42;LYN;YES1;PIK3CA;AKT2;MLST8;AKT1;TRIB3;PIK3R1;PAK2							Ectoderm Differentiation WP2858	23/138	0.6849	0.932462	0.914903	0.346275	ABCC4;SMAD4;NUMA1;TSC22D1;STX16;C1GALT1;TNFRSF11B;NLK;HDAC6;ZBTB2;WDR44;SERPINB6;SOX2;SDCBP;AHI1;SGSM3;NF2;BCOR;SKIL;PGM1;TRIM33;LY6E;BMPR1A
																											BRCA1-dependent ubiquitin ligase activity	2021-04-08	0.0391924	0.128381	4.58124	14.8399	BARD1;FANCA;BRCA1;FANCG							15q13.3 copy number variation syndrome WP4942	2021-03-19	0.688394	0.932462	0.858115	0.320415	MTMR10;CREBBP;GPR75
																											Downregulation of ERBB4 signaling	2021-04-08	0.0391924	0.128381	4.58124	14.8399	ITCH;WWP1;RPS27A;UBA52							Extracellular vesicles in the crosstalk of cardiac cells WP4300	2021-03-19	0.688394	0.932462	0.858115	0.320415	STAT3;SPP1;PDLIM5
																											NOD-like receptor (NLR) proteins	2021-04-08	0.0391924	0.128381	4.58124	14.8399	ERBB2IP;IKBKB;CHUK;MAP3K7							Host-pathogen interaction of human coronaviruses - autophagy WP4863	2021-03-19	0.688394	0.932462	0.858115	0.320415	BECN1;ATG16L1;ATG5
																											Thiamine metabolism	2021-04-08	0.0391924	0.128381	4.58124	14.8399	THTPA;MTMR2;PHPT1;MTMR6							Overview of nanoparticle effects WP3287	2021-03-19	0.688394	0.932462	0.858115	0.320415	CCND3;BAX;PTK2
																											HIF-1 transcriptional activity in hypoxia	18/66	0.0393125	0.128381	1.72008	5.56655	NCOA1;EGLN1;CREBBP;NPM1;SMAD4;TFRC;SERPINE1;FURIN;ENO1;HIF1A;HK1;PFKL;CREB1;ID2;PGK1;AKT1;PLIN2;PGM1							Wnt signaling WP428	19/115	0.690485	0.932462	0.905412	0.33533	GSK3B;CAMK2D;WNT5B;CTBP2;ROCK2;CSNK1A1;RYK;CHD8;NFATC3;NLK;SENP2;LRP6;MAPK9;CCND3;FRAT2;DAAM1;APC;GPC4;MAP3K7
																											Retinoblastoma protein regulation	18/66	0.0393125	0.128381	1.72008	5.56655	CDKN1A;CREBBP;SMARCB1;HDAC3;SIRT1;RUNX2;CCNA2;PPP2CA;MAPK9;CCND3;ELF1;CDK6;RBBP4;CDK4;E2F1;E2F4;SKP2;TAF1							Amino Acid Metabolism Pathway Excerpt (Histidine catabolism extension) WP4661	2021-01-06	0.694482	0.932462	0.915425	0.333754	HAL
																											Pathways in cancer	71/325	0.0397772	0.128381	1.28511	4.14379	ITGB1;GSK3B;CDKN1A;ARAF;LAMC1;PIK3CB;FGF2;CRKL;CKS1B;IKBKB;AKT2;CASP3;AKT1;SKP2;APPL1;JAK1;RALBP1;HSP90AA1;WNT5B;CHUK;DCC;NCOA4;PIAS2;TGFBR1;PIAS1;MSH6;MSH2;PIK3CA;TRAF4;MSH3;KIT;SOS1;CRK;SOS2;HDAC2;CTBP2;XIAP;PIK3R1;STK4;CBL;HIF1A;HSP90B1;RXRB;CDC42;MAPK9;NRAS;ERBB2;CTNNA1;E2F1;TCEB2;FADD;RUNX1T1;MAPK3;EGLN1;SMAD2;CREBBP;SMAD4;STAT1;BAD;STAT3;BRAF;LAMB1;PTK2;MAPK10;CDK6;RAD51;APC;CDK4;CCDC6;BAX;…							exRNA mechanism of action and biogenesis WP2805	2021-01-06	0.694482	0.932462	0.915425	0.333754	DROSHA
																											Cell cycle progression regulation by PLK3	2021-07-19	0.0402377	0.128381	2.67333	8.58926	PLK3;CASP3;CHEK1;CDK1;BAX;ATM;ATR							miRNA Biogenesis WP2338	2021-01-06	0.694482	0.932462	0.915425	0.333754	DROSHA
																											Mitochondrial gene expression	2021-07-19	0.0402377	0.128381	2.67333	8.58926	CREB1;TFAM;NRF1;TFB2M;POLRMT;PPRC1;GABPA							Robo4 and VEGF Signaling Pathways Crosstalk WP3943	2021-01-06	0.694482	0.932462	0.915425	0.333754	SLIT2
																											Telomeres, telomerase, cellular aging, and immortality	2021-07-19	0.0402377	0.128381	2.67333	8.58926	PPP2CA;HSP90AA1;TNKS;XRCC5;AKT1;KRAS;TERF1							Photodynamic therapy-induced AP-1 survival signaling. WP3611	1950-08-01	0.695435	0.932462	0.87157	0.316569	CCNA2;CDKN1A;HSP90AA1;BAX;BAK1;MAP2K7;JUNB;NFE2L2
																											BAD phosphorylation regulation	2021-09-27	0.040282	0.128381	2.29186	7.36113	PIK3CA;BAD;PRKAR1A;RPS6KA1;KIT;AKT1;BAX;PIK3R1;MAPK3							ncRNAs involved in Wnt signaling in hepatocellular carcinoma WP4336	14/86	0.69807	0.932462	0.889589	0.31975	GSK3B;WNT5B;CTBP2;CSNK1A1;RYK;CHD8;SENP2;NLK;MTDH;LRP6;CCND3;FRAT2;APC;EZH2
																											Cell cycle: G2/M checkpoint	2021-09-27	0.040282	0.128381	2.29186	7.36113	CDKN1A;PRKDC;CHEK1;RPS6KA1;CDK1;ATM;BRCA1;CDC25A;ATR							Constitutive Androstane Receptor Pathway WP2875	1932-05-01	0.703575	0.932462	0.847425	0.297938	NCOA1;HSP90AA1;DNAJC7;NCOA6;SMC1A
																											Cooperation of prefoldin and TriC/CCT in actin and tubulin folding	2021-09-27	0.040282	0.128381	2.29186	7.36113	CCT3;CCT6A;TUBB6;VBP1;CCT7;TUBB4B;PFDN5;ACTB;CCT4							Ovarian infertility WP34	1932-05-01	0.703575	0.932462	0.847425	0.297938	DAZL;NCOR1;CDK4;ATM;SYNE2
																											FSH signaling pathway	2021-09-27	0.040282	0.128381	2.29186	7.36113	CREB1;RPS6KB1;RHEB;GRK6;RPS6KB2;EIF4EBP1;AKT1;APPL1;MAPK3							SARS-CoV-2 mitochondrial interactions WP5038	1932-05-01	0.703575	0.932462	0.847425	0.297938	MAVS;TBK1;PHB;ECSIT;BCS1L
																											Insulin regulation of blood glucose	2021-09-27	0.040282	0.128381	2.29186	7.36113	GSK3B;GYS1;PPP1CC;PRKCI;AKT2;AKT1;YWHAZ;YWHAG;RHOQ							BMP2-WNT4-FOXO1 pathway in primary endometrial stromal cell differentiation WP3876	2021-02-13	0.705822	0.932462	0.832133	0.289909	SMAD9;SMAD5
																											Kinesins	2021-09-27	0.040282	0.128381	2.29186	7.36113	CENPE;KLC3;KIFC1;KIF5B;KIF23;KIF11;KIF22;KIFAP3;KIF15							Cell-type Dependent Selectivity of CCK2R Signaling WP3679	2021-02-13	0.705822	0.932462	0.832133	0.289909	DAGLA;GNAQ
																											eIF4E and p70 S6 kinase regulation	2021-09-27	0.040282	0.128381	2.29186	7.36113	PPP2CA;PIK3CA;RPS6KB1;EIF4EBP1;AKT1;PIK3R1;EIF4E;EIF4G3;MAPK3							Disorders of Folate Metabolism and Transport WP4259	2021-02-13	0.705822	0.932462	0.832133	0.289909	MTR;GART
																											BAD phosphorylation mediated by IGF1R signaling	2021-08-23	0.0407776	0.128485	2.44442	7.82122	PIK3CA;BAD;PRKAR1A;RPS6KA1;AKT1;PIK3R1;SOS1;MAPK3							Estrogen Receptor Pathway WP2881	2021-02-13	0.705822	0.932462	0.832133	0.289909	GPAM;STAT3
																											CREB transcription factor and its extracellular signals	2021-08-23	0.0407776	0.128485	2.44442	7.82122	CREB1;PIK3CA;PRKAR1A;RPS6KA1;AKT1;PIK3R1;SOS1;MAPK3							Ganglio Sphingolipid Metabolism WP1423	2021-02-13	0.705822	0.932462	0.832133	0.289909	SLC33A1;ST3GAL1
																											Hypoxia and p53 in the cardiovascular system	2021-08-23	0.0407776	0.128485	2.44442	7.82122	CDKN1A;HSP90AA1;IGFBP3;AKT1;BAX;ATM;HIF1A;TAF1							Valproic acid pathway WP3871	2021-02-13	0.705822	0.932462	0.832133	0.289909	ACADSB;HSD17B10
																											Mitochondrial pathway of apoptosis: antiapoptotic Bcl-2 family	2021-08-23	0.0407776	0.128485	2.44442	7.82122	MAPK10;MAPK9;CDK6;HAX1;BAX;MAPK6;BCL2L14;MAPK3							PPAR-alpha pathway WP2878	2021-04-26	0.710642	0.936681	0.832039	0.284213	SCP2;CDK4;CDK1;ACADM
																											PI3K events in ERBB2 signaling	13/44	0.0407799	0.128485	1.92284	6.15224	GSK3B;CDKN1A;CHUK;BAD;PIK3R1;CREB1;PIK3CA;AKT2;ERBB2;RPS6KB2;MLST8;AKT1;TRIB3							G Protein Signaling Pathways WP35	15/93	0.715607	0.941066	0.879736	0.294381	PRKCI;PDE4D;GNAI3;AKAP12;GNA13;GNG10;NRAS;AKAP11;PRKD3;PRKAR1A;GNB2;GNAQ;KRAS;CALM1;PDE8A
																											MicroRNAs in cardiomyocyte hypertrophy	22/85	0.0425961	0.133901	1.6021	5.05621	GSK3B;CAMK2D;CHUK;CISH;ROCK1;ROCK2;STAT3;PIK3CB;PIK3R1;FGF2;LRP6;IKBKB;CDK9;CDK7;PIK3CA;AKT2;AKT1;IL6ST;MAP2K7;CALM1;PRKG1;MAPK3							Synaptic Vesicle Pathway WP2267	1951-08-01	0.717236	0.941066	0.851249	0.282913	NAPA;CLTC;AP2S1;AP2A1;CLN8;STX2;AP2M1;DNM2
																											APOBEC3G-mediated resistance to HIV-1 infection	2021-03-05	0.0432301	0.134667	6.87078	21.5826	HMGA1;PSIP1;BANF1							Imatinib and Chronic Myeloid Leukemia WP3640	2021-03-20	0.722673	0.944827	0.807588	0.262303	NOP2;KIT;SKP2
																											Cycling of Ran in nucleocytoplasmic transport	2021-03-05	0.0432301	0.134667	6.87078	21.5826	RANBP2;RANBP1;RANGAP1							Pregnane X receptor pathway WP2876	1933-05-01	0.729947	0.944827	0.81711	0.257213	NCOA1;ABCC4;HSP90AA1;DNAJC7;NCOA3
																											GDP-mannose biosynthesis	2021-03-05	0.0432301	0.134667	6.87078	21.5826	GMPPB;GMPPA;MPI							Signal transduction through IL1R WP4496	1933-05-01	0.729947	0.944827	0.81711	0.257213	IKBKB;MAP3K1;CHUK;ECSIT;MAP3K7
																											UDP-N-acetyl-glucosamine biosynthesis	2021-03-05	0.0432301	0.134667	6.87078	21.5826	GFPT1;PGM3;GNPNAT1							Type I collagen synthesis in the context of Osteogenesis imperfecta WP4786	1933-05-01	0.729947	0.944827	0.81711	0.257213	MIA3;PLOD2;TNFRSF11B;TMEM38B;LRP6
																											RIG-I/MDA5-mediated induction of interferon-alpha/beta pathways	20/76	0.0440005	0.136758	1.63829	5.11729	APP;CREBBP;MAP3K1;CHUK;UBE2D1;HMGB1;TANK;IKBKB;SIKE1;ITCH;MAVS;TBK1;RNF125;TAX1BP1;PIN1;FADD;RPS27A;UBA52;UBE2K;ATG5							Endochondral Ossification with Skeletal Dysplasias WP4808	1964-10-01	0.733489	0.944827	0.847212	0.262588	CAB39;STAT1;SPP1;AKT1;ENPP1;CALM1;FGF2;SLC38A2;RUNX2;BMPR1A
																											PI3K/PLC/TRK pathway	1936-11-01	0.045739	0.141524	2.01711	6.22238	GSK3B;NRAS;CREB1;PIK3CA;BAD;AKT1;KRAS;PIK3R1;SOS1;YWHAZ;YWHAG							Endochondral Ossification WP474	1964-10-01	0.733489	0.944827	0.847212	0.262588	CAB39;STAT1;SPP1;AKT1;ENPP1;CALM1;FGF2;SLC38A2;RUNX2;BMPR1A
																											SNARE interactions in vesicular transport	1936-11-01	0.045739	0.141524	2.01711	6.22238	STX16;GOSR2;STX8;STX5;STX2;SEC22B;YKT6;BET1L;STX10;VTI1B;BET1							PI3K-Akt signaling pathway WP4172	57/340	0.734785	0.944827	0.920657	0.283726	ITGB1;GSK3B;CDKN1A;ITGB5;BRCA1;PIK3CB;LAMC1;FGF2;IKBKB;GYS1;CCND3;PPP2R1B;PPP2R1A;PPP2R5E;AKT2;MLST8;AKT1;JAK1;IFNAR2;HSP90AA1;SYK;CHUK;PPP2R5C;CREB3;CREB1;PIK3CA;EIF4E1B;KIT;SOS1;SOS2;EPHA2;ATF4;IFNAR1;CREB5;PRKAA1;PIK3R1;HSP90B1;PPP2CA;GNG10;NRAS;SPP1;EIF4EBP1;EIF4E;MAPK3;ANGPT1;BAD;LAMB1;PTK2;CDK6;RPS6KB1;RHEB;CDK4;GNB2;RPS6KB2;GNB4;PKN2;KRAS
																											MAP kinase signaling pathway	21/81	0.046032	0.142112	1.60558	4.94265	MAP3K2;MAP3K1;CHUK;STAT1;TGFBR1;IKBKB;MAPK10;MAPK9;CREB1;RPS6KB1;RPS6KA1;RPS6KB2;RAPGEF2;MAP2K7;MAP4K5;MAPK6;MAP3K7;PAK2;MAP3K4;MAP4K3;MAPK3							Canonical and non-canonical Notch signaling WP3845	2021-04-27	0.7392	0.944827	0.795815	0.240484	CHUK;CNTN6;ADAM10;RBPJ
																											ERK inactivation	2021-05-12	0.0481563	0.147319	3.27263	9.92688	PPP2CA;DUSP3;PPP2R1B;PPP2R1A;MAPK3							Aryl Hydrocarbon Receptor Pathway WP2873	1946-07-01	0.74173	0.944827	0.821208	0.245352	NCOA1;HSP90AA1;MGST1;BAX;POLK;JUNB;NFE2L2
																											Inhibition of replication initiation of damaged DNA by RB1/E2F1	2021-05-12	0.0481563	0.147319	3.27263	9.92688	PPP2CA;POLA1;PPP2R1B;PPP2R1A;E2F1							Oxysterols derived from cholesterol WP4545	1946-07-01	0.74173	0.944827	0.821208	0.245352	ACOT8;ACOT7;AMACR;SCP2;NR1H2;DHCR7;SLC27A5
																											Rab GTPases mark targets in the endocytotic machinery	2021-05-12	0.0481563	0.147319	3.27263	9.92688	RAB2A;RAB1A;RAB9A;RAB6A;RAB5A							Selenium Micronutrient Network WP15	14/89	0.746759	0.944827	0.853848	0.249335	ABCA1;GPX1;GPX4;TXNRD1;SERPINE1;MTR;PRDX3;PRDX2;PRDX5;PRDX4;FLAD1;RFK;CAT;GGT1
																											Resolution of AP sites via the single-nucleotide replacement pathway	2021-05-12	0.0481563	0.147319	3.27263	9.92688	SMUG1;MBD4;MPG;APEX1;LIG3							Activation of NLRP3 Inflammasome by SARS-CoV-2 WP4876	2021-01-07	0.749278	0.944827	0.762808	0.220181	PYCARD
																											Signaling by FGFR mutants	13/45	0.0482522	0.147319	1.86263	5.64622	CPSF6;STAT1;STAT3;PIK3R1;FGF2;NRAS;ZMYM2;PIK3CA;FGFR1OP2;TRIM24;FGFR1OP;KRAS;SOS1							COVID-19, thrombosis and anticoagulation WP4927	2021-01-07	0.749278	0.944827	0.762808	0.220181	F13A1
																											Interferon signaling	39/168	0.0486608	0.148238	1.38804	4.19588	NUP205;CAMK2D;SP100;NUP107;NUP188;EIF4A3;AAAS;SUMO1;NUP85;KPNA4;NUP43;RPS27A;B2M;KPNA3;EIF4E;RAE1;KPNA1;JAK1;MAPK3;IFNAR2;RANBP2;NUP155;IFNGR1;STAT1;NUP153;PTPN11;PIAS1;NUP93;ISG20;PPM1B;PIN1;NUP35;NUP54;UBA52;EIF4G3;KPNB1;IRF9;PTPN2;IFNAR1							Glial Cell Differentiation WP2276	2021-01-07	0.749278	0.944827	0.762808	0.220181	CNP
																											PERK-regulated gene expression	2021-09-28	0.0502227	0.152659	2.17111	6.49441	EXOSC5;HSPA5;DIS3;PARN;EIF2AK3;EXOSC2;EXOSC1;HERPUD1;ATF4							Hfe effect on hepcidin production WP3924	2021-01-07	0.749278	0.944827	0.762808	0.220181	ID1
																											Interleukin-9 signaling pathway	2021-06-16	0.0517992	0.154893	2.74927	8.1389	CDK9;STAT1;STAT3;PIK3R1;JAK1;MAPK3							MicroRNA for Targeting Cancer Growth and Vascularization in Glioblastoma WP3593	2021-01-07	0.749278	0.944827	0.762808	0.220181	HIF1A
																											Riboflavin metabolism	2021-06-16	0.0517992	0.154893	2.74927	8.1389	MTMR2;FLAD1;RFK;ENPP1;PHPT1;MTMR6							Nanomaterial-induced inflammasome activation WP3890	2021-01-07	0.749278	0.944827	0.762808	0.220181	PYCARD
																											SREBF and miR-33 in cholesterol and lipid homeostasis	2021-06-16	0.0517992	0.154893	2.74927	8.1389	ABCA1;PRKAA1;SCD;HMGCR;MED15;SIRT1							Non-genomic actions of 1,25 dihydroxyvitamin D3 WP4341	1971-11-01	0.749628	0.944827	0.838667	0.241685	IKBKB;RXRB;MED1;MAPK9;CAMK2D;NRAS;STAT1;SP3;KRAS;JAK1;MAPK3
																											Nicotinate and nicotinamide metabolism	2021-08-24	0.0518556	0.154893	2.2915	6.78123	NT5C;NT5C3A;NNT;NMRK1;NAMPT;ENPP1;NMNAT2;NADSYN1							Galanin receptor pathway WP4970	2021-03-21	0.753931	0.946917	0.762676	0.215421	YAP1;CDKN1A;CREB1
																											SREBP signaling	2021-08-24	0.0518556	0.154893	2.2915	6.78123	SEC23A;SEC24A;CREB1;INSIG2;SAR1B;SCAP;SEC24D;KPNB1							Type 2 papillary renal cell carcinoma WP4241	1934-05-01	0.754574	0.946917	0.788886	0.222152	EGLN1;CDKN1A;SETD2;CREBBP;HIF1A
																											Signal transduction of S1P receptor	2021-08-24	0.0518556	0.154893	2.2915	6.78123	ASAH1;SPHK2;SPHK1;AKT2;GNAI3;AKT1;MAPK6;MAPK3							Development of ureteric collection system WP5053	1947-07-01	0.762351	0.954597	0.800629	0.217249	ITGB1;FRAS1;MYCN;ILK;SLIT2;ETV4;ROBO1
																											TAK1 activates NF-kappaB by phosphorylation and activation of IKK complex	2021-08-24	0.0518556	0.154893	2.2915	6.78123	IKBKB;APP;CHUK;RIPK2;TAB3;TAB2;HMGB1;MAP3K7							FOXP3 in COVID-19 WP5063	2021-02-15	0.779351	0.969023	0.704026	0.175509	STAT3;IL6ST
																											Tumor suppressor Arf inhibits ribosomal biogenesis	2021-08-24	0.0518556	0.154893	2.2915	6.78123	HSP90AA1;PIK3CA;POLR1C;E2F1;POLR1D;AKT1;ATM;PIK3R1							GPR40 Pathway WP3958	2021-02-15	0.779351	0.969023	0.704026	0.175509	PLCL1;PLCD3
																											Cell differentiation pathway	2021-07-20	0.0526102	0.156134	2.46753	7.26651	MEF2A;SOX2;SRF;ID2;STAT3;RUNX2;EZH2							Mammary gland development pathway - Embryonic development (Stage 1 of 4) WP2813	2021-02-15	0.779351	0.969023	0.704026	0.175509	ITGB1;AKT1
																											RNA polymerase III abortive and retractive initiation	2021-07-20	0.0526102	0.156134	2.46753	7.26651	ZNF143;SSB;POLR3B;POLR3D;POLR2E;POLR3H;POLR2L							FGF23 signaling in hypophosphatemic rickets and related disorders WP4790	2021-03-22	0.782284	0.969023	0.722491	0.177399	CDKN1A;SPP1;ENPP1
																											Urea cycle and metabolism of amino groups	2021-07-20	0.0526102	0.156134	2.46753	7.26651	GAMT;GATM;CPS1;PYCR1;ASL;CKB;OTC							STING pathway in Kawasaki-like disease and COVID-19 WP4961	2021-03-22	0.782284	0.969023	0.722491	0.177399	IKBKB;TBK1;CHUK
																											Peroxisome	20/78	0.0560545	0.165998	1.5816	4.55728	ACOT8;ABCD3;MVK;IDH1;HSD17B4;PEX2;ACSL3;PEX12;GNPAT;PRDX5;AMACR;SCP2;AGPS;CAT;PEX5;PMVK;PXMP2;FAR1;MLYCD;ACOX3							Tryptophan metabolism WP465	1942-06-01	0.789006	0.969252	0.762477	0.180692	ALDH3A2;ECHS1;ALDH2;PRMT1;CAT;HSD17B10
																											Meiotic synapsis	15/55	0.0565845	0.166593	1.71948	4.93837	UBE2I;H2AFX;HIST1H2AJ;BRCA1;SMC3;SMC1A;TERF1;SYNE2;HIST2H2BE;REC8;STAG1;RAD21;POT1;HIST1H2BC;ATR							RAS and bradykinin pathways in COVID-19 WP4969	2021-04-29	0.789801	0.969252	0.73206	0.172747	ROCK1;SERPINE1;KLKB1;PRKG1
																											TAp63 pathway	15/55	0.0565845	0.166593	1.71948	4.93837	CDKN1A;CHUK;DST;IGFBP3;WWP1;AEN;NOC2L;IKBKB;ITCH;TP53I3;TRAF4;PERP;FLOT2;BAX;HBP1							Statin inhibition of cholesterol production WP430	2021-04-29	0.789801	0.969252	0.73206	0.172747	ABCA1;SOAT1;HMGCR;FDFT1
																											Transfer RNA aminoacylation	13/46	0.0566173	0.166593	1.80608	5.18605	RARS2;YARS;DARS;VARS;TARSL2;TARS;EPRS;NARS;LARS;RARS;IARS2;GARS;CARS2							Dual hijack model of Vif in HIV infection WP3300	2021-01-08	0.794248	0.969252	0.653796	0.150608	CBFB
																											Phospholipid metabolism	46/205	0.057744	0.169546	1.32845	3.78838	AGPAT5;PI4K2B;MTMR2;ASAH1;LPGAT1;PITPNB;HEXB;MTMR14;HEXA;PIK3R1;PIK3CB;PIK3C2A;TAZ;LCLAT1;AGPAT2;MTMR6;MTM1;PTDSS2;COL4A3BP;SMPD4;SPTLC1;ARSK;INPP5K;CEPT1;KDSR;PLA2G12A;PCYT1A;SPHK2;PNPLA8;SACM1L;SPHK1;PLA2G4C;EPT1;MBOAT2;GPCPD1;SUMF2;FIG4;GNPAT;PIKFYVE;GPAM;PIK3CA;VAPA;PEMT;PI4KB;LPIN2;CSNK1G2							NAD Biosynthesis II (from tryptophan) WP2485	2021-01-08	0.794248	0.969252	0.653796	0.150608	NADSYN1
																											Natural killer cell receptor signaling pathway	16/60	0.0600415	0.175918	1.66743	4.69002	VAV3;MAP3K2;MAP3K1;SYK;MAPK10;MAPK9;NRAS;PIK3CA;AKT2;AKT1;KRAS;SOS1;MAPK6;SOS2;MAP3K4;MAPK3							Phase I biotransformations, non P450 WP136	2021-01-08	0.794248	0.969252	0.653796	0.150608	ESD
																											RANKL regulation of apoptosis and immune response	19/74	0.0607065	0.176665	1.58433	4.43881	PRMT3;ADAM10;MKI67;PYCARD;CDC42;ZNF33A;MYL6;CDK7;DLG1;IL5;CDK4;FUBP1;CDC27;CDK1;ADAM9;BAK1;CALM1;GABPA;CDK16							Serine Metabolism WP4688	2021-01-08	0.794248	0.969252	0.653796	0.150608	PHGDH
																											AKT phosphorylation of nuclear targets	2021-04-09	0.0607312	0.176665	3.66477	10.2661	CREB1;AKT2;RPS6KB2;AKT1							Kynurenine Pathway and links to Cellular Senescence WP5044	2021-03-23	0.807878	0.981748	0.686324	0.146423	CDKN1A;KLF5;EIF2AK4
																											G2/M DNA damage checkpoint	2021-04-09	0.0607312	0.176665	3.66477	10.2661	CHEK1;CDK1;ATM;ATR							Genes controlling nephrogenesis WP4823	1943-06-01	0.807896	0.981748	0.741824	0.158247	ITGB1;ILK;SLIT2;ETV4;NCK1;CD2AP
																											VEGF, hypoxia, and angiogenesis	1942-12-01	0.0608085	0.176665	1.83369	5.13437	EIF2B4;HSP90AA1;PIK3CA;EIF1AX;AKT1;CSK;PIK3R1;EIF2S2;SOS1;HIF1A;PTK2;BCAR1							miRNAs involvement in the immune response in sepsis WP4329	1937-05-01	0.818293	0.990203	0.714797	0.143342	IKBKB;CHUK;TAB2;IRAK4;MAP3K7
																											Basigin interactions	2021-08-25	0.0646938	0.187487	2.15658	5.9049	ITGB1;SLC7A6;SLC16A1;SLC7A8;BSG;SLC3A2;SLC7A11;ATP1B1							Type II interferon signaling (IFNG) WP619	1937-05-01	0.818293	0.990203	0.714797	0.143342	STAT1;IFNGR1;PTPN11;IRF9;JAK1
																											Small cell lung cancer	21/84	0.0648051	0.187487	1.52885	4.18349	ITGB1;CHUK;XIAP;LAMB1;LAMC1;PIK3CB;PIK3R1;PIAS2;PTK2;CKS1B;PIAS1;IKBKB;RXRB;CDK6;PIK3CA;TRAF4;CDK4;AKT2;E2F1;AKT1;SKP2							Hedgehog Signaling Pathway WP4249	1944-06-01	0.825438	0.991193	0.722258	0.138559	CSNK1G3;CSNK1A1;CUL3;SPOPL;ARRB1;CSNK1G2
																											ERBB4 signaling events	1938-11-01	0.065232	0.187934	1.86746	5.09781	YAP1;ADAM17;ITCH;NCOR1;PIK3CA;ERBB2;WWP1;TAB2;PIK3CB;PIK3R1;MAPK3							Glucocorticoid Receptor Pathway WP2880	1970-10-01	0.82899	0.991193	0.762211	0.142951	ARL5B;HSP90AA1;NAV3;SERTAD2;CUL1;STOM;ACKR3;LRRC8A;POU5F1;KTN1
																											Triglyceride biosynthesis	1938-11-01	0.065232	0.187934	1.86746	5.09781	AGPAT5;SLC25A1;GK;GPAM;ELOVL5;ELOVL6;HSD17B12;ACSL3;AGPAT2;LCLAT1;LPIN2							Benzo(a)pyrene metabolism WP696	2021-01-09	0.831154	0.991193	0.572036	0.105793	AKR1A1
																											Long-term potentiation	18/70	0.0657875	0.189092	1.58738	4.31978	GRIA2;CAMK2D;CREBBP;PPP1R12A;ARAF;ITPR2;BRAF;PPP1CA;PPP1CB;PPP1CC;NRAS;RAP1A;GNAQ;RPS6KA1;KRAS;CALM1;ATF4;MAPK3							Biotin Metabolism (including IEMs) WP5031	2021-01-09	0.831154	0.991193	0.572036	0.105793	MCCC1
																											Regulation of transcription by NOTCH1 intracellular domain	13/47	0.0659083	0.189092	1.75285	4.76687	HDAC2;CREBBP;HDAC3;CUL1;CCNC;RBPJ;HIF1A;HDAC6;NCOR1;SNW1;TBL1XR1;RPS27A;UBA52							Methylation Pathways WP704	2021-01-09	0.831154	0.991193	0.572036	0.105793	MAT2B
																											Activation of DNA fragmentation factor	2021-05-13	0.0670241	0.189416	2.86338	7.73885	CASP3;HMGB1;HIST1H1A;KPNB1;KPNA1							16p11.2 distal deletion syndrome WP4950	1931-04-01	0.832209	0.991193	0.677751	0.124484	CR2;PRMT1;SPNS1;RAB5A
																											Chemiosmotic coupling formation of ATP	2021-05-13	0.0670241	0.189416	2.86338	7.73885	ATP5A1;ATP5D;ATP5I;ATP5F1;ATP5G1							Toll-like Receptor Signaling related to MyD88 WP3858	1931-04-01	0.832209	0.991193	0.677751	0.124484	IKBKB;TBK1;CHUK;IRAK4
																											Keap1-Nrf2 pathway	2021-05-13	0.0670241	0.189416	2.86338	7.73885	GCLC;PIK3CA;KEAP1;GCLM;NFE2L2							Glycosaminoglycan degradation WP4815	2021-02-17	0.836236	0.991193	0.610082	0.10911	HEXB;HEXA
																											N-glycan trimming in the ER and calnexin/calreticulin cycle	2021-05-13	0.0670241	0.189416	2.86338	7.73885	EDEM3;PDIA3;CANX;UGGT2;UGGT1							NOTCH1 regulation of endothelial cell calcification WP3413	2021-02-17	0.836236	0.991193	0.610082	0.10911	CALU;SAT1
																											Prolactin regulation of apoptosis	28/118	0.0670446	0.189416	1.42737	3.85732	VPS29;SDCCAG3;DCTN3;BRCA1;SPRED1;TBK1;MRPL40;HNRNPA1;PHLDA1;PCMTD1;HSP90AA1;CISH;HSPA5;ANGPT1;MID1IP1;LANCL1;FNDC3A;KLHL24;PPRC1;RUNX2;NUP93;TM9SF2;HAX1;PSMA4;PQLC1;MAFF;KLF9;CMPK1							Parkinson's disease pathway WP2371	1938-05-01	0.836319	0.991193	0.693094	0.123887	ATXN2;CASP3;HTRA2;UBA1;EPRS
																											E-cadherin keratinocyte pathway	2021-07-21	0.0671191	0.189416	2.29114	6.18903	VASP;PIK3CA;AKT2;CTNND1;CTNNA1;AKT1;PIK3R1							Mammary gland development pathway - Pregnancy and lactation (Stage 3 of 4) WP2817	1932-04-01	0.850585	0.999995	0.653506	0.105757	CHUK;ERBB2;EIF4E;USF2
																											IGF1 signaling pathway	2021-07-21	0.0671191	0.189416	2.29114	6.18903	PIK3CA;SRF;RASA1;PTPN11;PIK3R1;SOS1;MAPK3							White fat cell differentiation WP4149	1932-04-01	0.850585	0.999995	0.653506	0.105757	CREB1;KLF5;CTNNA1;EBF1
																											Oxidative stress-induced gene expression via Nrf2	2021-07-21	0.0671191	0.189416	2.29114	6.18903	CREB1;MAFF;KEAP1;MAFK;HMOX2;CRYZ;NFE2L2							Differentiation of white and brown adipocyte WP2895	2021-03-25	0.851477	0.999995	0.623855	0.100305	PLAC8;SMAD9;SMAD5
																											Cell surface interactions at the vascular wall	23/94	0.0680249	0.190794	1.48589	3.99388	ITGB1;LYN;GRB7;ITGAM;SLC16A1;YES1;ANGPT1;SLC3A2;PTPN11;PIK3CB;SLC7A11;PIK3R1;F11R;ATP1B1;SLC7A6;NRAS;PIK3CA;SLC7A8;BSG;OLR1;KRAS;SOS1;JAM3							Liver X receptor pathway WP2874	2021-01-10	0.861441	0.999995	0.508446	0.0758339	SCD
																											G1/S-specific transcription	2021-06-17	0.0682987	0.190794	2.49919	6.70748	CDT1;POLA1;PCNA;CDK1;E2F1;CDC25A							SARS-CoV-2 and COVID-19 Pathway WP4846	2021-01-10	0.861441	0.999995	0.508446	0.0758339	FURIN
																											PIP biosynthesis at the Golgi membrane	2021-06-17	0.0682987	0.190794	2.49919	6.70748	FIG4;PI4K2B;PIKFYVE;SACM1L;PI4KB;PIK3C2A							PTF1A related regulatory pathway WP4147	2021-01-11	0.886297	0.999995	0.457573	0.0552306	RBPJ
																											Platelet sensitization by LDL	2021-06-17	0.0682987	0.190794	2.49919	6.70748	PPP2CA;PPP2R1B;PPP2R1A;PPP2R5E;PTPN11;PPP2R5C							Serotonin Transporter Activity WP1455	2021-01-11	0.886297	0.999995	0.457573	0.0552306	SCAMP2
																											Zinc transporters	2021-06-17	0.0682987	0.190794	2.49919	6.70748	SLC30A7;SLC30A6;SLC39A6;SLC39A10;SLC30A1;SLC39A3							Thyroid hormones production and their peripheral downstream signaling effects WP4746	13/95	0.8911	0.999995	0.724663	0.0835525	GSK3B;BAD;SECISBP2L;ITPR2;TTF1;MAFA;CREB3;PIK3CA;RPS6KB1;RHEB;MLST8;SOS1;MAP4K5
																											Apoptotic execution phase	14/52	0.0703184	0.196039	1.68904	4.48394	BCAP31;ROCK1;HMGB1;PTK2;OCLN;APC;CASP3;DSG2;CLSPN;HIST1H1A;PAK2;KPNB1;KPNA1;PLEC							Nanoparticle triggered regulated necrosis WP2513	2021-01-12	0.906695	0.999995	0.41595	0.0407421	FADD
																											Interleukin-2/STAT5 pathway	2021-09-30	0.0745978	0.206821	1.9641	5.09809	CCNA2;CCND3;ELF1;CDK6;PIK3CA;PTPN11;PIK3R1;SOS1;JAK1							Wnt signaling in kidney disease WP4150	1936-04-01	0.907896	0.999995	0.571678	0.0552386	MAPK10;MAPK9;WNT5B;LRP6
																											Assembly of the ORC complex at the origin of replication	2021-03-06	0.075085	0.206821	4.58024	11.8589	ORC4;ORC3;ORC2							FOXA2 pathway WP5066	2021-02-21	0.911983	0.999995	0.481526	0.0443651	ABCC4;SLC27A5
																											Basic mechanisms of SUMOylation	2021-03-06	0.075085	0.206821	4.58024	11.8589	UBE2I;SUMO1;UBA2							Globo Sphingolipid Metabolism WP1424	2021-02-21	0.911983	0.999995	0.481526	0.0443651	ST6GAL1;ST3GAL1
																											DNA replication initiation	2021-03-06	0.075085	0.206821	4.58024	11.8589	POLA1;POLE2;POLE							Complement and Coagulation Cascades WP558	1958-07-01	0.915356	0.999995	0.627522	0.0554996	LMAN1;CR2;CLTC;SERPINE1;TFPI;KLKB1;CD55
																											ER quality control compartment (ERQC)	2021-03-06	0.075085	0.206821	4.58024	11.8589	EDEM3;UGGT2;UGGT1							Heart Development WP1591	1944-05-01	0.915938	0.999995	0.586249	0.0514766	SMAD4;SRF;NFATC3;PTPN11;BMPR1A
																											Proteolysis and signaling pathway of Notch	2021-03-06	0.075085	0.206821	4.58024	11.8589	ADAM17;FURIN;RBPJ							Control of immune tolerance by vasoactive intestinal peptide WP4484	2021-01-13	0.923434	0.999995	0.381265	0.0303699	IL5
																											Iron uptake and transport	1939-11-01	0.0767292	0.210929	1.80066	4.62315	ATP6V1A;ATP6V0B;ATP6V1G1;ATP6V0E1;TFRC;ATP6V1B2;MCOLN1;ATP6V1D;ATP6V1C1;HMOX2;ATP6V1F							Dopamine metabolism WP2436	2021-01-13	0.923434	0.999995	0.381265	0.0303699	PPP2CA
																											ALK1 pathway	2021-08-26	0.0793308	0.217215	2.03664	5.16112	ACVR1;SMAD4;ID1;SMAD9;SMAD5;TGFBR1;MAPK3;PPP1CA							EDA signaling in hair follicle development WP3930	2021-01-13	0.923434	0.999995	0.381265	0.0303699	EDARADD
																											ERBB2 role in signal transduction and oncology	2021-08-26	0.0793308	0.217215	2.03664	5.16112	PIK3CA;ERBB2;STAT3;AKT1;PIK3R1;IL6ST;SOS1;MAPK3							Mammary gland development pathway - Puberty (Stage 2 of 4) WP2814	2021-01-13	0.923434	0.999995	0.381265	0.0303699	ERBB2
																											JNK/MAPK pathway	14/53	0.0804433	0.219391	1.64563	4.14733	MEF2A;MAP3K2;MAP3K1;NFATC3;DUSP16;CDC42;MAPK10;MAPK9;HNRNPK;TAB2;MAP2K7;MAP3K7;DLD;MAP3K4							Neuroinflammation WP4919	2021-01-13	0.923434	0.999995	0.381265	0.0303699	CHUK
																											Thrombin signaling through protease-activated receptors	14/53	0.0804433	0.219391	1.64563	4.14733	ARFGEF1;ARFGEF2;ROCK1;ARRB1;PIK3R1;GNA13;CYTH2;GNG10;PIK3CA;GNAQ;GNB2;GNB4;MAP3K7;MAPK3							Transcriptional cascade regulating adipogenesis WP4211	2021-01-13	0.923434	0.999995	0.381265	0.0303699	KLF5
																											Lysine degradation	1944-12-01	0.082503	0.224564	1.71887	4.28845	ALDH3A2;SUV39H2;SETD2;ECHS1;ALDH2;SETDB1;EHMT2;NSD1;SETDB2;PLOD2;AASS;WHSC1L1							Inflammatory Response Pathway WP453	2021-03-30	0.924713	0.999995	0.508171	0.0397753	IL5;LAMB1;LAMC1
																											Interleukin-2/PI3K pathway	1935-10-01	0.0827261	0.224728	1.83322	4.56879	HSP90AA1;PIK3CA;RPS6KB1;E2F1;AKT1;PTPN11;PIK3R1;SOS1;EIF3A;JAK1							miRNA targets in ECM and membrane receptors WP2911	2021-02-22	0.924952	0.999995	0.457422	0.0356849	ITGB5;LAMC1
																											COPI-mediated vesicle transport	2021-04-10	0.0872503	0.232621	3.05379	7.44811	COPB2;COPB1;COPE;ARCN1							PKC-gamma calcium signaling pathway in ataxia WP4760	2021-02-22	0.924952	0.999995	0.457422	0.0356849	GRIA2;GNAQ
																											Cdc25 and Chk1 regulatory pathway in response to DNA damage	2021-04-10	0.0872503	0.232621	3.05379	7.44811	CHEK1;CDK1;ATM;CDC25A							Prostaglandin Synthesis and Regulation WP98	1945-05-01	0.925221	0.999995	0.571558	0.0444233	ABCC4;ANXA6;AKR1B1;PTGFRN;PTGES
																											Deregulation of CDK5 in Alzheimer's disease	2021-04-10	0.0872503	0.232621	3.05379	7.44811	PPP2CA;APP;GSK3B;CAPN1							Nuclear receptors WP170	1938-04-01	0.928455	0.999995	0.537984	0.0399361	RXRB;NR1H2;NR1D2;NR2C2
																											Electron transport reaction in mitochondria	2021-04-10	0.0872503	0.232621	3.05379	7.44811	GPD2;ATP5A1;UQCRC1;SDHD							Sleep regulation WP3591	1938-04-01	0.928455	0.999995	0.537984	0.0399361	CST3;AHCY;DRD1;SLC29A1
																											Nef-mediated downregulation of MHC class I complex cell surface expression	2021-04-10	0.0872503	0.232621	3.05379	7.44811	AP1G1;AP1B1;AP1S1;B2M							Phosphodiesterases in neuronal function WP4222	1953-06-01	0.931825	0.999995	0.583632	0.0412104	CREB1;PDE12;PDE4D;PDE5A;DRD1;PDE8A
																											Netrin mediated repulsion signals	2021-04-10	0.0872503	0.232621	3.05379	7.44811	DCC;UNC5B;PTPN11;PTK2							Arrhythmogenic Right Ventricular Cardiomyopathy WP2118	1974-09-01	0.932256	0.999995	0.632851	0.0443928	ITGB1;GJA1;ITGB5;SGCB;CTNNA1;ATP2A2;DSG2;EMD;ACTB
																											Splicing regulation through Sam68	2021-04-10	0.0872503	0.232621	3.05379	7.44811	KHDRBS1;RASA1;CDK1;MAPK3							GABA receptor Signaling WP4159	2021-03-31	0.934625	0.999995	0.489992	0.0331286	AP2S1;AP2A1;AP2M1
																											Tetrahydrobiopterin (BH4) biosynthesis, recycling, salvage and regulation	2021-04-10	0.0872503	0.232621	3.05379	7.44811	HSP90AA1;GCH1;AKT1;CALM1							Blood Clotting Cascade WP272	2021-02-23	0.936102	0.999995	0.435613	0.0287638	SERPINE1;KLKB1
																											Deadenylation-dependent mRNA decay	13/49	0.0873614	0.232621	1.65527	4.03505	DDX6;DIS3;EIF4A3;PARN;LSM5;LSM4;LSM2;EXOSC5;LSM7;CNOT8;EIF4E;EXOSC2;EXOSC1							Osteoblast Signaling WP322	2021-01-14	0.937171	0.999995	0.351915	0.0228356	TNFRSF11B
																											Effect of METS on macrophage differentiation	2021-06-18	0.0874855	0.232621	2.29078	5.58099	HDAC2;RBL1;SIN3A;DDX20;E2F1;E2F4							Prader-Willi and Angelman Syndrome WP3998	1961-07-01	0.938164	0.999995	0.592551	0.037823	PCM1;CDK6;CDK4;NIPA1;E2F1;UBE3A;MDM4
																											Human cytomegalovirus and MAP kinase pathways	2021-06-18	0.0874855	0.232621	2.29078	5.58099	MAP3K1;CREB1;PIK3CA;AKT1;PIK3R1;MAPK3							NO/cGMP/PKG mediated Neuroprotection WP4008	1947-05-01	0.941093	0.999995	0.544275	0.0330446	CAMK2D;CREB1;BAD;XIAP;CALM1
																											Activated NOTCH1 signaling in the nucleus	1931-09-01	0.0890948	0.23599	1.8747	4.53314	PSENEN;ADAM17;ITCH;ADAM10;ARRB1;DTX2;RPS27A;UBA52;MIB1							Development and heterogeneity of the ILC family WP3893	1932-03-01	0.943318	0.999995	0.473067	0.0276042	IL5;NFIL3;ID2
																											Gluconeogenesis	1931-09-01	0.0890948	0.23599	1.8747	4.53314	SLC25A1;GPI;TPI1;PGK1;ALDOC;SLC25A10;ENO1;SLC25A11;SLC25A13							Apoptosis Modulation and Signaling WP1772	1990-11-01	0.945662	0.999995	0.636222	0.0355459	IKBKB;BAD;CASP3;HTRA2;XIAP;BAX;BIRC6;TNFRSF11B;FADD;BAK1;MAPK3
																											Retrograde neurotrophin signaling	2021-05-14	0.0893948	0.236331	2.54507	6.14556	CLTC;AP2S1;AP2A1;AP2M1;DNM2							Calcium Regulation in the Cardiac Cell WP536	20/150	0.947385	0.999995	0.702532	0.0379715	CAMK2D;GNAI3;ITPR2;ATP2A2;ARRB1;ATP2B1;ATP1B1;YWHAZ;GJA1;STIM2;PRKAR1A;GNB2;GNAQ;GRK6;GNB4;ANXA6;RGS10;CALM1;PKIG;YWHAG
																											AMPK signaling	17/68	0.0899287	0.237288	1.52825	3.68116	CDKN1A;PRKAA1;CAB39;STRADA;PIK3CB;HMGCR;PIK3R1;ADIPOR2;CAMKK2;CCNA2;GYS1;PIK3CA;RPS6KB1;AKT2;RPS6KB2;EIF4EBP1;AKT1							Fatty Acid Omega Oxidation WP206	2021-01-15	0.948444	0.999995	0.326758	0.0172962	ALDH2
																											Interferon-gamma signaling pathway	23/97	0.0907721	0.239056	1.42539	3.42007	CREBBP;CAMK2D;SP100;MAP3K1;CISH;IFNGR1;PTGES2;STAT1;STAT3;PTPN11;PIK3R1;CBL;CRKL;PIAS1;RAP1A;SUMO1;PIK3CA;AKT1;B2M;IRF9;PTPN2;JAK1;MAPK3							GPCRs, Class C Metabotropic glutamate, pheromone WP501	2021-01-15	0.948444	0.999995	0.326758	0.0172962	GPRC5C
																											Interleukin-3 signaling pathway	1945-12-01	0.0949579	0.249604	1.66668	3.92391	LYN;SYK;BAD;STAT3;AKT1;PTPN11;PIK3R1;CBL;SOS1;CRKL;JAK1;MAPK3							Role of Osx and miRNAs in tooth development WP3971	2021-01-15	0.948444	0.999995	0.326758	0.0172962	RUNX2
																											CTCF pathway	2021-08-27	0.0957724	0.250314	1.92933	4.52579	PPP2CA;SMAD4;PIK3CA;RPS6KB1;CTCF;PIK3R1;SMAD5;TGFBR1							Lung fibrosis WP3624	1963-07-01	0.950175	0.999995	0.571319	0.0291995	IL5;PARN;SPP1;ATP11A;FGF2;SKIL;NFE2L2
																											Collecting duct acid secretion	2021-08-27	0.0957724	0.250314	1.92933	4.52579	ATP6V1A;ATP6V1G1;ATP6V0E1;CA2;ATP6V1B2;ATP6V1D;ATP6V1C1;ATP6V1F							Spinal Cord Injury WP2431	15/118	0.950638	0.999995	0.665189	0.0336734	ROCK2;RHOC;RTN4;RHOB;CDC42;GJA1;VCAN;CDK4;CASP3;APEX1;CCNG1;CDK1;E2F1;SLIT2;MAPK3
																											ERK5 role in neuronal survival pathway	2021-08-27	0.0957724	0.250314	1.92933	4.52579	MEF2A;CREB1;PIK3CA;RPS6KA1;AKT1;PIK3R1;SOS1;MAPK3							Endothelin Pathways WP2197	1933-03-01	0.950928	0.999995	0.45727	0.0230087	CNN1;ATP2A2;CALM1
																											MAPK cascade role in angiogenesis	16/64	0.0978255	0.255197	1.5281	3.55219	GRB7;ANGPT1;BAD;PTPN11;IQGAP1;SHB;ROBO1;CDC42;APC;AKT1;KRAS;SLIT2;SOS1;MAP3K7;CRK;NCK1							NRF2 pathway WP2884	19/146	0.956439	0.999995	0.683106	0.0304243	GSTM4;ABCC4;HSP90AA1;MGST3;TXNRD1;KEAP1;SLC39A10;SLC7A11;PTGR1;GCLC;SLC39A9;MAFF;SLC39A6;GGT1;GCLM;SLC39A3;EPHA2;NFE2L2;CBR3
																											Wnt signaling pathway and pluripotency	23/98	0.0993441	0.258669	1.40629	3.24737	GSK3B;PRKCI;CREBBP;WNT5B;CTBP2;CTNND1;ZBTB33;PPP2R5C;NLK;POU5F1;LRP6;SOX2;PPP2CA;MAPK10;MAPK9;CCND3;PPP2R1B;PPP2R4;APC;PPP2R1A;PPP2R5E;MAP3K7;PAFAH1B1							Hedgehog Signaling Pathway Netpath WP47	2021-01-16	0.957694	0.999995	0.304956	0.0131822	SIN3A
																											Integrins in angiogenesis	18/74	0.102344	0.265675	1.47363	3.35903	VAV3;HSP90AA1;ROCK1;ILK;PTPN11;PIK3R1;F11R;PIK3C2A;CBL;FGF2;PTK2;PIK3CA;RPS6KB1;SPP1;AKT1;PI4KB;BCAR1;MAPK3							Metabolic pathway of LDL, HDL and TG, including diseases WP4522	2021-01-16	0.957694	0.999995	0.304956	0.0131822	ABCA1
																											Angiogenesis	2021-07-23	0.102612	0.265675	2.00451	4.56386	CREBBP;ANGPT1;PIK3CA;AKT1;FGF2;HIF1A;PTK2							Vitamin B12 metabolism WP1533	1950-05-01	0.959251	0.999995	0.507897	0.0211298	ABCA1;MTRR;SERPINE1;MTR;MUT
																											Signaling by bone morphogenetic protein (BMP)	2021-07-23	0.102612	0.265675	2.00451	4.56386	GREM2;SMAD4;ZFYVE16;SMAD9;UBE2D1;SMAD5;BMPR1A							Pre-implantation embryo WP3527	1958-06-01	0.961621	0.999995	0.527353	0.0206381	SOX2;TEAD4;BATF3;HMGA1;TPRX1;POU5F1
																											Fc epsilon receptor I signaling in mast cells	1941-11-01	0.103314	0.266621	1.68041	3.8145	LYN;MAP3K1;SYK;PIK3CA;NFATC3;PIK3R1;MAP2K7;CALM1;SOS1;PAK2;MAPK3							ACE Inhibitor Pathway WP554	2021-01-17	0.965286	0.999995	0.285879	0.0101005	ATP6AP2
																											Calcineurin-dependent NFAT signaling role in lymphocytes	14/55	0.103364	0.266621	1.56517	3.55215	GSK3B;CREBBP;MAP3K1;BAD;CSNK1A1;NFATC3;YWHAZ;MAPK9;XPO1;CASP3;RCAN2;YWHAG;KPNB1;MAPK3							Cells and molecules involved in local acute inflammatory response WP4493	2021-01-17	0.965286	0.999995	0.285879	0.0101005	ITGB1
																											Serotonin HTR1 group and FOS pathway	1932-09-01	0.105134	0.270681	1.79309	4.03896	ELK4;RAP1A;MAP3K1;CREB1;PIK3CA;SRF;GNAI3;BRAF;MAPK3							Drug Induction of Bile Acid Pathway WP2289	2021-01-17	0.965286	0.999995	0.285879	0.0101005	ABCC4
																											Cell junction organization	20/84	0.105505	0.27113	1.4328	3.22237	ITGB1;VASP;PRKCI;CD151;DST;CADM1;CTNND1;ILK;F11R;MPP5;PVR;MLLT4;INADL;CDH12;CTNNA1;FLNA;FLNC;FERMT2;PLEC;LIMS1							Serotonin and anxiety WP3947	2021-01-17	0.965286	0.999995	0.285879	0.0101005	FMR1
																											Alpha-6 beta-1 and alpha-6 beta-4 integrin signaling	1946-12-01	0.10849	0.278282	1.61756	3.59277	ITGB1;RXRB;PIK3CA;RPS6KB1;ERBB2;AKT1;CD9;LAMB1;LAMC1;PIK3R1;YWHAZ;YWHAG							Sudden Infant Death Syndrome (SIDS) Susceptibility Pathways WP706	20/158	0.971363	0.999995	0.661481	0.0192192	CREBBP;MAZ;CTCF;YBX1;HIF1A;YWHAZ;POU5F1;HSP90B1;HSPD1;SOX2;GJA1;REST;CREB1;PRKAR1A;CASP3;SP3;ACADM;SPTBN1;CC2D1A;YWHAG
																											Destabilization of mRNA by butyrate response factor 1 (BRF1)	2021-06-19	0.109292	0.278786	2.11444	4.6808	EXOSC5;DIS3;AKT1;TNPO1;EXOSC2;EXOSC1							Interactions between immune cells and microRNAs in tumor microenvironment WP4559	2021-02-28	0.971925	0.999995	0.351734	0.0100164	STAT3;IRAK4
																											G-protein-independent seven transmembrane receptor signaling	2021-06-19	0.109292	0.278786	2.11444	4.6808	MAPK10;MAPK9;SOAT1;GRK6;MAPK6;MAPK3							Nuclear Receptors Meta-Pathway WP2882	45/319	0.972008	0.999995	0.748582	0.021253	MGST3;MGST1;CUL1;KEAP1;SLC7A11;ARL5B;SCP2;SERTAD2;SLC39A9;SLC39A6;STOM;LRRC8A;ACADM;POLK;GGT1;JUNB;CBR3;SLC39A3;GSTM4;NCOA1;ABCC4;HSP90AA1;NCOA6;NCOA3;TXNRD1;STAT3;SLC39A10;PTGR1;SMC1A;POU5F1;KTN1;GCLC;GPAM;DNAJC7;NAV3;CDK4;SCD;MAFF;CDK1;ACKR3;BAX;GCLM;SLC27A5;EPHA2;NFE2L2
																											MAL role in Rho-mediated activation of SRF	2021-06-19	0.109292	0.278786	2.11444	4.6808	CDC42;MAP3K1;ROCK1;SRF;LIMK1;MAPK3							Complement system WP2806	1997-11-01	0.972114	0.999995	0.584186	0.0165219	PRNP;CR2;RPS19;CSNK1A1;GNAI3;SPP1;F13A1;LAMB1;LAMC1;KLKB1;CD55
																											Recycling pathway of cell adhesion molecule L1	2021-08-28	0.113992	0.283644	1.83276	3.98006	DPYSL2;CLTC;RPS6KA1;RDX;AP2S1;AP2A1;AP2M1;DNM2							Cardiac Progenitor Differentiation WP2406	1953-05-01	0.972138	0.999995	0.476066	0.0134522	SOX2;GSK3B;KIT;FGF2;POU5F1
																											TRAIL signaling pathway	2021-08-28	0.113992	0.283644	1.83276	3.98006	IKBKB;MAP3K1;CHUK;PIK3CA;PIK3CB;PIK3R1;FADD;MAPK3							Melatonin metabolism and effects WP3298	1937-03-01	0.972793	0.999995	0.403375	0.0111266	GSK3B;CALM1;SIRT1
																											CREB phosphorylation	2021-03-07	0.114305	0.283644	3.43497	7.45007	ATF1;CREB1;RPS6KA1							Selective expression of chemokine receptors during T-cell polarization WP4494	2029-02-01	0.976257	0.999995	0.338686	0.00813855	IL5;IFNGR1
																											Creatine metabolism	2021-03-07	0.114305	0.283644	3.43497	7.45007	GAMT;GATM;CKB							Farnesoid X receptor pathway WP2879	2021-01-19	0.976626	0.999995	0.254083	0.00600935	SLC27A5
																											FYVE-finger proteins in vesicle transport	2021-03-07	0.114305	0.283644	3.43497	7.45007	EEA1;TFRC;RAB5A							LTF danger signal response pathway WP4478	2021-01-19	0.976626	0.999995	0.254083	0.00600935	IRAK4
																											Fas signaling pathway in cardiomyocytes	2021-03-07	0.114305	0.283644	3.43497	7.45007	GSK3B;AKT2;AKT1							Small Ligand GPCRs WP247	2021-01-19	0.976626	0.999995	0.254083	0.00600935	CNR2
																											Internal ribosome entry pathway	2021-03-07	0.114305	0.283644	3.43497	7.45007	EIF4E;EIF4G3;EIF3A							Dopaminergic Neurogenesis WP2855	1930-02-01	0.979938	0.999995	0.32657	0.00661818	SOX2;STAT3
																											Nef-mediated CD8 downregulation	2021-03-07	0.114305	0.283644	3.43497	7.45007	AP2S1;AP2A1;AP2M1							Oligodendrocyte specification and differentiation, leading to myelin components for CNS WP4304	1930-02-01	0.979938	0.999995	0.32657	0.00661818	CNP;FGF2
																											Negative regulation of the PI3K/Akt network	2021-03-07	0.114305	0.283644	3.43497	7.45007	AKT2;AKT1;TRIB3							Neural Crest Differentiation WP2064	11/101	0.98135	0.999995	0.558085	0.0105063	ITGB1;GSK3B;HDAC2;HDAC3;CTBP2;ID1;TCF4;RBPJ;FGF2;HDAC6;RHOB
																											PELP1 modulation of estrogen receptor activity	2021-03-07	0.114305	0.283644	3.43497	7.45007	CREBBP;MAPK3;PELP1							Nicotine Activity on Dopaminergic Neurons WP1602	2021-01-21	0.984263	0.999995	0.228647	0.0036269	PPP1CA
																											PP2A-mediated dephosphorylation of key metabolic factors	2021-03-07	0.114305	0.283644	3.43497	7.45007	PPP2CA;PPP2R1B;PPP2R1A							Pathogenesis of SARS-CoV-2 Mediated by nsp9-nsp10 Complex WP4884	2021-01-21	0.984263	0.999995	0.228647	0.0036269	NKRF
																											Zinc efflux and compartmentalization by the SLC30 family	2021-03-07	0.114305	0.283644	3.43497	7.45007	SLC30A7;SLC30A6;SLC30A1							Hair Follicle Development: Organogenesis - Part 2 of 3 WP2839	1932-02-01	0.985713	0.999995	0.304762	0.00438555	ITGB1;RUNX2
																											Bile acid and bile salt biosynthesis via 7-alpha-hydroxycholesterol	2021-05-15	0.115102	0.283644	2.29042	4.95174	ACOT8;AMACR;SCP2;HSD17B4;SLC27A5							Monoamine Transport WP727	1932-02-01	0.985713	0.999995	0.304762	0.00438555	TNFRSF11B;SCAMP2
																											Glycosaminoglycan biosynthesis: keratan sulfate	2021-05-15	0.115102	0.283644	2.29042	4.95174	B4GALT2;B4GALT3;FUT8;B3GNT2;ST3GAL1							Complement Activation WP545	2021-01-22	0.987087	0.999995	0.217746	0.00283007	CD55
																											Messenger RNA decay by 5' to 3' exoribonuclease	2021-05-15	0.115102	0.283644	2.29042	4.95174	DDX6;LSM7;LSM5;LSM4;LSM2							Transcription factor regulation in adipogenesis WP3599	2021-01-22	0.987087	0.999995	0.217746	0.00283007	CREB1
																											PRC2 complex long-term gene silencing through modification of histone tails	2021-05-15	0.115102	0.283644	2.29042	4.95174	SUZ12;HDAC2;PHC1;RBBP4;EZH2							Nuclear Receptors in Lipid Metabolism and Toxicity WP299	1933-02-01	0.987957	0.999995	0.294913	0.00357316	ABCA1;ABCD3
																											Signaling to p38 via RIT and RIN	2021-05-15	0.115102	0.283644	2.29042	4.95174	NRAS;CDK1;BRAF;KRAS;MAPK3							Purinergic signaling WP4900	1933-02-01	0.987957	0.999995	0.294913	0.00357316	P2RX4;GNAI3
																											TRAF6-mediated induction of TAK1 complex	2021-05-15	0.115102	0.283644	2.29042	4.95174	TAB3;TAB2;RPS27A;MAP3K7;UBA52							GDNF/RET signaling axis WP4830	2021-01-23	0.989404	0.999995	0.207836	0.00221389	SLIT2
																											Validated nuclear estrogen receptor beta network	2021-05-15	0.115102	0.283644	2.29042	4.95174	NCOA1;SMARCB1;NCOA3;UBA3;ZNF14							GPCRs, Class B Secretin-like WP334	2021-01-24	0.991306	0.999995	0.198787	0.00173582	GHRHR
																											Axon guidance	67/325	0.116299	0.286082	1.19226	2.56525	SEMA5A;ITGB1;GSK3B;CLTC;AP2A1;WASL;LAMC1;ROBO1;CHL1;DPYSL2;CFL2;DPYSL3;RPS6KA1;AP2M1;NCK1;HSP90AA1;UNC5B;DCC;RHOG;RHOC;RHOB;DNM2;ENAH;MYL6;CREB1;RASA1;MYH9;SOS1;DOCK1;SOS2;EPHA2;PFN2;NFAT5;ROCK1;SEMA3C;ROCK2;GNAI3;CDC42;SDCBP;NRAS;ERBB2;AP2S1;ABL2;SLIT2;PAK2;MYH10;SPTBN1;PLXNA4;CLASP1;PAK4;CLASP2;MAPK3;VASP;PRNP;MYO10;CNTN6;RDX;LIMK1;NFATC3;RANBP9;LAMB1;PTPN11;PTK2;DLG1;CDK1;KRAS;CD24							IL1 and megakaryocytes in obesity WP2865	2021-01-24	0.991306	0.999995	0.198787	0.00173582	PIK3CA
																											ALK2 pathway	2021-04-11	0.118346	0.286142	2.61737	5.58584	ACVR1;SMAD4;SMAD9;SMAD5							Photodynamic therapy-induced NF-kB survival signaling WP3617	1935-02-01	0.991461	0.999995	0.277006	0.00237543	IKBKB;CHUK
																											Alpha-linolenic (omega3) and linoleic (omega6) acid metabolism	2021-04-11	0.118346	0.286142	2.61737	5.58584	ACOT8;SCP2;ELOVL5;HSD17B4							Mammalian disorder of sexual development WP4842	2021-01-25	0.992866	0.999995	0.190493	0.0013638	RBFOX2
																											Mechanism of protein import into the nucleus	2021-04-11	0.118346	0.286142	2.61737	5.58584	RANBP2;NUP153;RANGAP1;KPNB1							Cytokines and Inflammatory Response WP530	2021-01-26	0.994146	0.999995	0.182862	0.00107353	IL5
																											Messenger RNA decay by 3' to 5' exoribonuclease	2021-04-11	0.118346	0.286142	2.61737	5.58584	EXOSC5;DIS3;EXOSC2;EXOSC1							Matrix Metalloproteinases WP129	2021-01-30	0.997346	0.999995	0.157601	0.000418788	BSG
																											Osteopontin signaling	2021-04-11	0.118346	0.286142	2.61737	5.58584	IKBKB;CHUK;SPP1;MAPK3							Vitamin A and carotenoid metabolism WP716	1943-02-01	0.997891	0.999995	0.222847	0.000470413	RXRB;RBP1
																											Recruitment of NuMA to mitotic centrosomes	2021-04-11	0.118346	0.286142	2.61737	5.58584	NEDD1;NUMA1;TUBGCP2;CDK1							Monoamine GPCRs WP58	1933-01-01	0.998533	0.999995	0.1428	0.000209588	DRD1
																											Fibroblast growth factor receptor pathway	24/105	0.11838	0.286142	1.35862	2.8991	PRKCI;BAD;PTPN11;PIK3R1;CBL;FGF2;MAPK10;MAPK9;NRAS;CREB1;SOAT1;PIK3CA;RPS6KB1;RPS6KC1;AKT2;RPS6KA1;RPS6KB2;AKT1;KRAS;MAP2K7;SOS1;MAPK6;SOS2;MAPK3							Differentiation Pathway WP2848	1948-02-01	0.999132	0.999995	0.198564	0.000172338	KIT;FGF2
																											BMP receptor signaling	1942-11-01	0.118396	0.286142	1.6261	3.46965	GSK3B;PPM1A;SMAD4;ZFYVE16;XIAP;SMAD9;TAB2;MAP3K7;SMAD5;PPP1CA;BMPR1A							Striated Muscle Contraction Pathway WP383	1938-01-01	0.999453	0.999995	0.123465	6.75243e-05	TPM2
																											Netrin-1 signaling	1942-11-01	0.118396	0.286142	1.6261	3.46965	CDC42;MYO10;DCC;UNC5B;PTPN11;WASL;SLIT2;DOCK1;PTK2;ROBO1;NCK1							Vitamin D Receptor Pathway WP2877	17/182	0.999622	0.999995	0.469078	0.000177303	CDKN1A;LPGAT1;ITGAM;IGFBP3;MED9;CCNC;TNFRSF11B;MYO9B;PRDM1;ASAP2;ATP2B1;HIF1A;ID1;SPP1;CD9;JUNB;ZNF257
																											TWEAK signaling pathway	1942-11-01	0.118396	0.286142	1.6261	3.46965	IKBKB;GSK3B;MAPK9;CHUK;TNFRSF12A;AKT2;CASP3;AKT1;FADD;MAP3K7;MAPK3							Metapathway biotransformation Phase I and II WP702	17/183	0.999661	0.999995	0.466224	0.000157924	GSTM4;NAA50;NAA30;HS3ST3A1;CHST7;GPX4;GSTO1;GSTCD;MGST3;GSS;CYP51A1;MGST1;AKR1A1;AKR1B1;HS2ST1;GSTZ1;NDST1
																											FGF signaling pathway	15/61	0.11898	0.28705	1.49465	3.18181	STAT1;CTNND1;STAT3;PTPN11;PIK3R1;CBL;FGF2;RUNX2;PIK3CA;RPS6KA1;SPP1;AKT1;SOS1;MAPK3;PAK4							Hematopoietic Stem Cell Differentiation WP2849	1955-02-01	0.999752	0.999995	0.172265	4.27174e-05	IL5;RIOK3
																											PIP biosynthesis at the plasma membrane	1933-09-01	0.122689	0.295401	1.71827	3.60511	PI4K2B;PIK3CA;MTMR14;INPP5K;PIK3CB;PIK3R1;PIK3C2A;MTMR6;MTM1							Allograft Rejection WP2328	1989-05-01	0.99984	0.999995	0.271439	4.34405e-05	IL5;STAT1;CASP3;GABPA;CD55
																											Delta Np63 pathway	1947-12-01	0.123089	0.295401	1.57125	3.29153	TOP2A;YAP1;GSK3B;HELLS;ITCH;RRAD;DLX6;PERP;IGFBP3;WWP1;ATM;HBP1							Oxidation by Cytochrome P450 WP43	1961-02-01	0.999915	0.999995	0.154689	1.3196e-05	CYB5R4;CYP51A1
																											LKB1 signaling events	1947-12-01	0.123089	0.295401	1.57125	3.29153	GSK3B;PRKAA1;HSP90AA1;SMAD4;CREB1;CAB39;STRADA;MLST8;CTSD;ETV4;YWHAZ;YWHAG							GPCRs, Other WP117	1991-03-01	0.999993	0.999995	0.155336	1.08449e-06	GHRHR;GPR176;ALG6
																											Lysosome vesicle biogenesis	2021-07-24	0.123512	0.295401	1.88648	3.94542	AP1G1;BLOC1S1;CLTC;AP1B1;AP1S1;ARRB1;DNM2							GPCRs, Class A Rhodopsin-like WP455	4/257	0.999995	0.999995	0.0713316	3.71363e-07	CNR2;GPR75;ACKR3;DRD1
																											Protein export	2021-07-24	0.123512	0.295401	1.88648	3.94542	SPCS3;HSPA5;SRP72;SRP54;SEC62;SRP9;SEC63
																											Focal adhesion	49/233	0.125093	0.298664	1.22197	2.54012	ITGB1;GSK3B;ITGAM;ITGB5;ARAF;ILK;LAMC1;PIK3CB;ARHGAP5;ACTB;CRKL;PPP1CB;PPP1CC;CCND3;AKT2;AKT1;CAPN1;VAV3;PPP1R12A;RHOB;MYL6;PIK3CA;SOS1;CRK;DOCK1;SOS2;ROCK1;ROCK2;XIAP;PIK3R1;CDC42;MAPK9;RAP1A;ERBB2;SPP1;FLNA;FLNC;MAPK6;PAK2;PAK4;MAPK3;VASP;BAD;BRAF;LAMB1;PTK2;PPP1CA;MAPK10;BCAR1
																											PI3K cascade	14/57	0.129849	0.308951	1.49219	3.04612	GSK3B;CDKN1A;CHUK;BAD;PTPN11;PIK3R1;FGF2;CREB1;PIK3CA;AKT2;RPS6KB2;MLST8;AKT1;TRIB3
																											SHP2 signaling	14/57	0.129849	0.308951	1.49219	3.04612	ANGPT1;IFNGR1;LMO4;STAT1;GNAI3;PTPN11;PIK3R1;MLLT4;NRAS;PIK3CA;KRAS;IL6ST;SOS1;JAK1
																											Apoptotic signaling in response to DNA damage	2021-06-20	0.133585	0.316747	1.96329	3.95214	BAD;STAT1;CASP3;AKT1;BAX;ATM
																											Signaling by Hippo	2021-06-20	0.133585	0.316747	1.96329	3.95214	YAP1;MOB1A;CASP3;STK4;SAV1;STK3
																											Homologous recombination	2021-08-29	0.133933	0.317029	1.74538	3.50892	MUS81;BLM;RAD50;RAD51;POLD2;XRCC3;ATM;NBN
																											Cell differentiation by G alpha (i/o) pathway inferred from mouse Neuro2A model	1943-11-01	0.134646	0.317627	1.57519	3.15843	ASAH1;NRAS;CREBBP;RAP1A;AKT2;STAT3;ILK;AKT1;BRAF;KRAS;CRK
																											Growth hormone receptor signaling	1943-11-01	0.134646	0.317627	1.57519	3.15843	LYN;ADAM17;CISH;PIK3CA;STAT1;SRF;RPS6KA1;STAT3;PIK3R1;SOS1;MAPK3
																											Costimulation by the CD28 family	17/72	0.135595	0.31932	1.41676	2.8308	LYN;YES1;PTPN11;PPP2R5C;PIK3R1;CDC42;PPP2CA;PPP2R1B;PIK3CA;PPP2R1A;PPP2R5E;AKT2;MLST8;AKT1;TRIB3;CSK;PAK2
																											Presenilin action in Notch and Wnt signaling	1948-12-01	0.138735	0.326158	1.52751	3.01712	PSENEN;GSK3B;CREBBP;ADAM17;APC;CSNK1A1;ADAM10;NLK;RBPJ;MAP3K7;LRP6;MAPK3
																											Fatty acid beta oxidation	1934-09-01	0.14171	0.330896	1.64944	3.22296	ACADVL;ACSS2;ECHS1;TPI1;GK;GPD2;ACADM;ACSL3;DLD
																											HIF-2-alpha transcription factor network	1934-09-01	0.14171	0.330896	1.64944	3.22296	EGLN1;CREBBP;APEX1;SERPINE1;PGK1;TCEB2;EIF3E;SIRT1;POU5F1
																											MAPK/TRK pathway	1934-09-01	0.14171	0.330896	1.64944	3.22296	MAP3K2;NRAS;RAP1A;CREB1;SRF;RPS6KA1;BRAF;KRAS;MAPK3
																											TOR signaling	1934-09-01	0.14171	0.330896	1.64944	3.22296	CDC42;PRKAA1;RPS6KB1;RHEB;EIF4EBP1;MLST8;ULK3;AKT1;PRR5L
																											Acetylation and deacetylation of RelA in the nucleus	2021-05-16	0.143876	0.333136	2.08207	4.03673	IKBKB;CREBBP;HDAC3;CHUK;FADD
																											Pantothenate and CoA biosynthesis	2021-05-16	0.143876	0.333136	2.08207	4.03673	PANK4;PANK3;ENPP1;BCAT1;BCAT2
																											Protein kinase A (PKA) at the centrosome	2021-05-16	0.143876	0.333136	2.08207	4.03673	PPP2CA;NUP85;CDK1;PCNT;PPP1CA
																											TGF-beta receptor signaling in EMT (epithelial to mesenchymal transition)	2021-05-16	0.143876	0.333136	2.08207	4.03673	ARHGEF18;F11R;RPS27A;UBA52;TGFBR1
																											p75 neurotrophin receptor signaling via NF-kB	2021-05-16	0.143876	0.333136	2.08207	4.03673	IKBKB;PRKCI;RIPK2;RPS27A;UBA52
																											Cellular response to hypoxia	2021-07-25	0.146385	0.336686	1.78157	3.4233	EGLN1;CREBBP;UBE2D1;TCEB2;RPS27A;HIF1A;UBA52
																											DARPP-32 events	2021-07-25	0.146385	0.336686	1.78157	3.4233	PPP2CA;PPP2R1B;PPP2R1A;PRKAR1A;PDE4D;CALM1;PPP1CA
																											Fatty acid biosynthesis	2021-07-25	0.146385	0.336686	1.78157	3.4233	ACSS2;ECHS1;MECR;SCD;ECHDC1;ACSL3;MCAT
																											TPO signaling pathway	2021-07-25	0.146385	0.336686	1.78157	3.4233	PIK3CA;STAT1;RASA1;STAT3;PIK3R1;SOS1;MAPK3
																											Vasopressin-regulated water reabsorption	1944-11-01	0.152027	0.349081	1.52737	2.87709	DYNC1I2;DYNC1H1;CREB3;DYNC1LI1;DYNC1LI2;CREB1;DCTN2;DCTN4;RAB5A;RAB11B;CREB5
																											Beta-arrestins in GPCR desensitization	2021-04-12	0.153441	0.350578	2.29006	4.29258	ADRBK1;AP2A1;ARRB1;AP2M1
																											NF-kappaB activation through FADD/RIP-1 pathway	2021-04-12	0.153441	0.350578	2.29006	4.29258	IKBKB;MAVS;CHUK;FADD
																											Pyruvate dehydrogenase (PDH) complex regulation	2021-04-12	0.153441	0.350578	2.29006	4.29258	PDP1;PDHX;PDHA1;DLD
																											Interleukin-5 regulation of apoptosis	31/144	0.153756	0.350715	1.25793	2.35534	IDI1;CCNH;SRF;HEXA;ENO1;HMGCR;HIF1A;SUPT6H;CCND3;TBK1;NFIL3;QSOX1;FADD;UPP1;MAPK6;MAP3K7;CD55;MAPK3;MAP3K2;TRAP1;DUSP5;YES1;CHUK;GK;TFPI2;SCRIB;CREB1;ID2;CD24;ATF4;NFE2L2
																											Arf6 integrin-mediated signaling pathway	1949-12-01	0.155397	0.352387	1.48614	2.76685	ITGB1;SPAG9;EXOC7;CLTC;CTNND1;CTNNA1;EXOC3;EXOC5;ASAP2;DNM2;SCAMP2;EXOC1
																											G alpha 12 pathway	1949-12-01	0.155397	0.352387	1.48614	2.76685	MEF2A;VAV3;MAP3K2;MAPK10;MAPK9;NRAS;MAP3K1;KRAS;MAPK6;MAP3K4;PTK2;MAPK3
																											Inactivation of GSK3 by Akt causes accumulation of beta-catenin in alveolar macrophages	2021-08-30	0.15551	0.352387	1.66594	3.10039	PPP2CA;GSK3B;GJA1;APC;PIK3CA;AKT1;PIK3R1;LRP6
																											Tumor necrosis factor (TNF) pathway	2021-08-30	0.15551	0.352387	1.66594	3.10039	IKBKB;MAPK10;MAPK9;MAP3K1;CASP3;FADD;MAP2K7;MAP3K7
																											Arginine and proline metabolism	13/54	0.157929	0.354731	1.45296	2.6816	GAMT;AMD1;PYCR1;SAT2;SAT1;GLS;ALDH3A2;GATM;ALDH2;CPS1;ASL;CKB;OTC
																											Meiotic recombination	13/54	0.157929	0.354731	1.45296	2.6816	BLM;H2AFX;HIST1H2AJ;BRCA1;HIST2H2BE;MLH3;RAD50;HIST1H3A;RAD51;CDK4;ATM;NBN;HIST1H2BC
																											CHL1 interactions	2021-03-08	0.159372	0.354731	2.74781	5.04639	ITGB1;CHL1;CNTN6
																											Chromatin remodeling by nuclear receptors to facilitate initiation of transcription in carcinoma cells	2021-03-08	0.159372	0.354731	2.74781	5.04639	NCOA1;GTF2A1;HDAC3
																											Folate and pterine metabolism	2021-03-08	0.159372	0.354731	2.74781	5.04639	FPGS;SLC25A32;SLC19A1
																											Glycogen biosynthesis	2021-03-08	0.159372	0.354731	2.74781	5.04639	GYS1;UGP2;PGM1
																											Mitochondrial beta-oxidation of saturated fatty acids	2021-03-08	0.159372	0.354731	2.74781	5.04639	ACADVL;ECHS1;ACADM
																											Nef-induced signal transduction	2021-03-08	0.159372	0.354731	2.74781	5.04639	ELMO1;DOCK2;PAK2
																											Nicotinate metabolism	2021-03-08	0.159372	0.354731	2.74781	5.04639	NAMPT;NMNAT2;NADSYN1
																											Shuttle for transfer of acetyl groups from mitochondria to the cytosol	2021-03-08	0.159372	0.354731	2.74781	5.04639	SLC25A1;PDHA1;SLC25A11
																											Transcription factor regulation of microRNAs related to cardiac hypertrophy	2021-03-08	0.159372	0.354731	2.74781	5.04639	AKT2;STAT3;AKT1
																											Biosynthesis of unsaturated fatty acids	2021-06-21	0.160171	0.355363	1.83229	3.35587	ACOT7;ELOVL5;SCD;ELOVL6;HSD17B12;ACOX3
																											CD28-dependent PI3K/Akt signaling	2021-06-21	0.160171	0.355363	1.83229	3.35587	PIK3CA;AKT2;MLST8;AKT1;TRIB3;PIK3R1
																											Angiotensin II-stimulated signaling through G-proteins and beta-arrestin	15/64	0.161139	0.356711	1.40288	2.56095	MAP3K2;PRKCI;MAP3K1;PLCL1;ITPR2;ARRB1;MAPK10;MAPK9;ADRBK1;GNAQ;GRK6;MAPK6;PLCD3;MAP3K4;MAPK3
																											Interleukin-4 signaling pathway	23/104	0.161295	0.356711	1.30165	2.37488	CISH;CHUK;BAD;STAT1;STAT3;HMGA1;PTPN11;PIK3R1;CBL;IKBKB;IL5;PIK3CA;NFIL3;RPS6KB1;AKT2;RPS6KB2;AKT1;IL13RA2;SOS1;SOS2;SOCS5;JAK1;MAPK3
																											Granule cell survival pathway	22/99	0.161903	0.357234	1.30968	2.38462	MAP3K2;GSK3B;CREBBP;MAP3K1;PLCL1;CREB3;MYCN;SMPD4;CREB1;PPP2R4;AKT2;GNAQ;CASP3;POLR2C;AKT1;BAX;POLR2G;CYC1;KCNK1;PLCD3;MAP3K4;CREB5
																											NFAT involvement in hypertrophy of the heart	16/69	0.16205	0.357234	1.38352	2.5178	GSK3B;CREBBP;CSNK1A1;NFATC3;ATP2A2;PIK3R1;FGF2;CAMKK2;PIK3CA;RPS6KB1;PRKAR1A;AKT1;SOS1;CALM1;ADSS;MAPK3
																											Adherens junction cell adhesion	17/74	0.162609	0.357895	1.36688	2.48282	SMAD2;CREBBP;SMAD4;YES1;CTNND1;WASL;IQGAP1;NLK;MLLT4;ACTB;TGFBR1;CDC42;FER;ERBB2;CTNNA1;MAP3K7;MAPK3
																											Fc epsilon receptor I signaling pathway	18/79	0.162878	0.357917	1.35243	2.45433	VAV3;LYN;PLA2G12A;SYK;PIK3CB;PIK3R1;MAPK10;MAPK9;NRAS;IL5;PIK3CA;AKT2;AKT1;KRAS;SOS1;MAP2K7;SOS2;MAPK3
																											Steroid biosynthesis	2021-07-26	0.17109	0.375364	1.6877	2.97974	SOAT1;HSD17B1;CYP51A1;HSD17B4;SC5D;DHCR7;FDFT1
																											Type 2 diabetes mellitus	1950-12-01	0.173033	0.379026	1.44694	2.53833	IKBKB;MAPK10;MAPK9;SURF1;PIK3CA;GK;PIK3CB;PIK3R1;MAFA;SOCS4;HK1;MAPK3
																											Apoptotic cleavage of cellular proteins	2021-05-17	0.175367	0.379915	1.90845	3.32238	BCAP31;ROCK1;CASP3;CLSPN;PTK2
																											Cell to cell adhesion signaling	2021-05-17	0.175367	0.379915	1.90845	3.32238	CTNNA1;PTPN11;CSK;PTK2;BCAR1
																											Endocytotic role of NDK, phosphins and dynamin	2021-05-17	0.175367	0.379915	1.90845	3.32238	AP2A1;CALM1;EPS15;AP2M1;PICALM
																											Energy-dependent regulation of mTOR by LKB1-AMPK	2021-05-17	0.175367	0.379915	1.90845	3.32238	PPM1A;PRKAA1;CAB39;STRADA;RHEB
																											GRB2-SOS provides linkage to MAPK signaling for integrins	2021-05-17	0.175367	0.379915	1.90845	3.32238	RAP1A;SOS1;CRK;PTK2;BCAR1
																											SHC-related events	2021-05-17	0.175367	0.379915	1.90845	3.32238	NRAS;CDK1;KRAS;SOS1;MAPK3
																											SHC1 events in EGFR signaling	2021-05-17	0.175367	0.379915	1.90845	3.32238	NRAS;CDK1;KRAS;SOS1;MAPK3
																											Cardiac muscle contraction	18/80	0.176893	0.381891	1.33054	2.30477	COX8A;COX7B;UQCRB;COX4I1;TPM2;ATP2A2;COX7A2;UQCR11;UQCR10;COX6A1;ATP1B1;COX5B;COX5A;COX6B1;SLC9A6;UQCRQ;UQCRC1;CYC1
																											Long-term depression	16/70	0.177073	0.381891	1.35782	2.35064	LYN;GRIA2;PLA2G12A;ARAF;GNAI3;ITPR2;BRAF;GNA13;PPP2CA;NRAS;PPP2R1B;PPP2R1A;GNAQ;KRAS;PRKG1;MAPK3
																											Glycolysis and gluconeogenesis	17/75	0.177109	0.381891	1.34323	2.32512	GPI;PDHX;PDHA2;TPI1;ACSS2;PDHA1;AKR1A1;ENO1;HK1;ALDH3A2;PFKL;ALDH2;PGK1;ALDOC;DLD;PFKM;PGM1
																											Alpha-6 beta-4 integrin signaling pathway	2021-08-31	0.178611	0.384529	1.59341	2.74472	EIF4EBP1;AKT1;LAMB1;PTPN11;LAMC1;PIK3R1;PTK2;MAPK3
																											Ion transport by P-type ATPases	1936-09-01	0.183853	0.394583	1.52707	2.58628	ATP8B1;ATP2B4;ATP2A2;ATP11C;ATP11B;ATP11A;ATP2B1;ATP2C1;ATP1B1
																											Signaling to ERKs	1936-09-01	0.183853	0.394583	1.52707	2.58628	NRAS;RAP1A;KIDINS220;CDK1;BRAF;KRAS;SOS1;CRK;MAPK3
																											FOXM1 transcription factor network	1941-10-01	0.187495	0.401775	1.47786	2.47395	CCNA2;CREBBP;CENPF;CDK4;NFATC3;CDK1;SKP2;AURKB;CENPB;CKS1B
																											Beta-alanine metabolism	2021-06-22	0.188812	0.402101	1.71767	2.86335	ALDH3A2;ECHS1;ALDH2;ACADM;MLYCD;HIBCH
																											Smooth muscle contraction	2021-06-22	0.188812	0.402101	1.71767	2.86335	MYL6;ITGB5;CALD1;TPM2;MYL6B;CALM1
																											T cell receptor downstream signaling	2021-06-22	0.188812	0.402101	1.71767	2.86335	IKBKB;CHUK;RIPK2;TAB2;MAP3K7;MALT1
																											TRAF6 mediated NF-kB activation	2021-06-22	0.188812	0.402101	1.71767	2.86335	IKBKB;APP;MAVS;MAP3K1;CHUK;HMGB1
																											Glycerophospholipid biosynthesis	19/86	0.190598	0.404201	1.29961	2.15422	AGPAT5;PLA2G12A;LPGAT1;PCYT1A;PNPLA8;PITPNB;PLA2G4C;EPT1;MBOAT2;TAZ;GPCPD1;LCLAT1;AGPAT2;GNPAT;PTDSS2;GPAM;PEMT;CEPT1;LPIN2
																											Platelet activation, signaling and aggregation	42/205	0.191312	0.404201	1.18154	1.95409	APP;DGKD;DAGLA;STXBP3;WDR1;SERPINE1;GNAI3;F13A1;ITPR2;ARRB1;PIK3R1;PIK3CB;CDC42;GNA13;GNG10;RAP1A;AKT2;LAMP2;AKT1;FLNA;CSK;MAPK3;LYN;VAV3;ABCC4;SYK;HSPA5;RHOG;DGKZ;YWHAZ;PTK2;RHOB;PIK3CA;GNAQ;GNB2;CALU;GNB4;CD9;CALM1;SOS1;CRK;BCAR1
																											Type I interferon (interferon-alpha/beta) pathway	1951-12-01	0.191593	0.404201	1.40975	2.32945	PTP4A1;PTP4A2;STAT1;PTPMT1;PTPN11;PTPN12;PTPN4;PTPN14;IRF9;PTPN2;JAK1;IFNAR1
																											Melanocyte development and pigmentation pathway	2021-04-13	0.191849	0.404201	2.03549	3.36068	CREB1;KIT;RPS6KA1;MAPK3
																											PI3K class IB pathway	2021-04-13	0.191849	0.404201	2.03549	3.36068	NRAS;AKT2;AKT1;KRAS
																											Purine salvage	2021-04-13	0.191849	0.404201	2.03549	3.36068	DGUOK;ADK;DCK;APRT
																											p27 phosphorylation regulation during cell cycle progression	2021-04-13	0.191849	0.404201	2.03549	3.36068	CUL1;E2F1;SKP2;CKS1B
																											Melanoma	16/71	0.192769	0.404903	1.33305	2.19455	CDKN1A;BAD;ARAF;BRAF;PIK3CB;PIK3R1;FGF2;NRAS;CDK6;PIK3CA;CDK4;AKT2;E2F1;AKT1;KRAS;MAPK3
																											Mitochondrial pathway of apoptosis: multidomain Bcl-2 family	16/71	0.192769	0.404903	1.33305	2.19455	UBL4A;PRNP;PRKCI;HSPA4;HTRA2;ITPR2;HSPA14;UBL5;UBL3;CAPN7;MFN1;MFN2;BAX;CAPN1;BAK1;UBL7
																											Oxidative stress	2021-07-27	0.197451	0.414107	1.60321	2.60084	MAPK10;GCLC;CAT;MGST1;JUNB;TXN2;NFE2L2
																											Antigen-activated B-cell receptor generation of second messengers	43/211	0.198273	0.4152	1.17364	1.89908	GSK3B;NFAT5;ITPR2;PIK3R1;PIK3CB;CBL;MALT1;CRKL;IKBKB;CDC42;MAPK9;NRAS;AKT2;RPS6KA1;REV3L;AKT1;CSK;MAPK6;MAP3K7;GTF2I;NCK1;MAPK3;LYN;VAV3;PRKCI;CR2;MAP3K1;SYK;CHUK;BAD;NFATC3;BRAF;PTPN11;MAPK10;IBTK;CREB1;PIK3CA;RASA1;KRAS;CALM1;SOS1;CRK;SOS2
																											Syndecan 4 pathway	1932-08-01	0.203103	0.424671	1.52692	2.43398	ITGB1;SDCBP;MDK;GIPC1;TFPI;FGF2;PTK2;DNM2
																											ALK in cardiac myocytes	1937-09-01	0.20678	0.425739	1.47244	2.32072	ACVR1;GSK3B;SMAD4;RFC1;APC;MAP3K7;SMAD5;TGFBR1;BMPR1A
																											Calcium/calmodulin-dependent protein kinase activation	2021-03-09	0.208692	0.425739	2.2897	3.58772	CREB1;CALM1;CAMKK2
																											EGFR transactivation by gastrin	2021-03-09	0.208692	0.425739	2.2897	3.58772	NRAS;KRAS;SOS1
																											Heme biosynthesis	2021-03-09	0.208692	0.425739	2.2897	3.58772	UROD;UROS;HMBS
																											Inactivation of Cdc42 and Rac	2021-03-09	0.208692	0.425739	2.2897	3.58772	CDC42;SLIT2;ROBO1
																											Nef-mediated CD4 downregulation	2021-03-09	0.208692	0.425739	2.2897	3.58772	AP2S1;AP2A1;AP2M1
																											PI3K/AKT signalling	2021-03-09	0.208692	0.425739	2.2897	3.58772	MLST8;AKT1;TRIB3
																											PPAR-gamma coactivator role in obesity and thermogenesis	2021-03-09	0.208692	0.425739	2.2897	3.58772	NCOA1;MED1;CREBBP
																											Phenylalanine and tyrosine catabolism	2021-03-09	0.208692	0.425739	2.2897	3.58772	GSTZ1;CCBL1;PCBD1
																											Pyrimidine salvage reactions	2021-03-09	0.208692	0.425739	2.2897	3.58772	TK1;UPP1;DCK
																											Type I hemidesmosome assembly	2021-03-09	0.208692	0.425739	2.2897	3.58772	CD151;DST;PLEC
																											Urea cycle	2021-03-09	0.208692	0.425739	2.2897	3.58772	CPS1;ASL;OTC
																											Bone remodeling	2021-05-18	0.209167	0.425739	1.76154	2.75614	IFNAR2;IKBKB;CHUK;IRF9;IFNAR1
																											Botulinum neurotoxicity	2021-05-18	0.209167	0.425739	1.76154	2.75614	STX16;STX8;STX5;STX2;STX10
																											Corticosteroids and cardioprotection	2021-05-18	0.209167	0.425739	1.76154	2.75614	HSP90AA1;PIK3CA;AKT1;PIK3R1;CALM1
																											Fatty acyl-CoA biosynthesis	2021-05-18	0.209167	0.425739	1.76154	2.75614	SLC25A1;ELOVL5;ELOVL6;ACSL3;HSD17B12
																											Nicotinic acetylcholine receptor role in the regulation of apoptosis	2021-05-18	0.209167	0.425739	1.76154	2.75614	PIK3CA;BAD;AKT1;PIK3R1;PTK2
																											Transcriptional activity regulation by PML	2021-05-18	0.209167	0.425739	1.76154	2.75614	CREBBP;SP100;UBE2I;SUMO1;SIRT1
																											G alpha 13 pathway	15/67	0.210038	0.426479	1.3217	2.06248	PRKCI;MAP3K1;ROCK1;ROCK2;SRF;RDX;ARHGEF18;PIK3CB;PHKA2;PTK2;IKBKB;CDC42;AKT2;AKT1;MAP2K7
																											Pyruvate metabolism	1952-12-01	0.211018	0.426479	1.37443	2.13835	ALDH3A2;PDP1;PDHX;PDHA2;ACSS2;PDHA1;SLC16A1;ALDH2;BSG;AKR1B1;ME2;DLD
																											Signaling events mediated by PTP1B	1952-12-01	0.211018	0.426479	1.37443	2.13835	LYN;FER;YES1;PIK3CA;STAT3;AKT1;CSK;YBX1;CAPN1;PIK3R1;CRK;BCAR1
																											Inositol phosphate metabolism	13/57	0.211076	0.426479	1.35365	2.10565	PI4K2B;ISYNA1;TPI1;IPMK;PIK3CB;PIK3C2A;MINPP1;PIKFYVE;IMPA1;PIK3CA;INPP5K;PI4KB;PLCD3
																											Pre-NOTCH expression and processing	13/57	0.211076	0.426479	1.35365	2.10565	CREBBP;SEL1L;ATP2A2;FURIN;RFNG;RBPJ;SNW1;E2F1;TMED2;ST3GAL6;RAB6A;TNRC6A;TNRC6B
																											Collagen binding in corneal epithelia mediated by Erk and PI-3 Kinase	2021-06-23	0.219236	0.438716	1.61653	2.45326	ITGB1;ROCK1;PIK3CA;PIK3R1;ARHGAP5;MAPK3
																											Mitochondrial fatty acid beta-oxidation	2021-06-23	0.219236	0.438716	1.61653	2.45326	ACADVL;ECHS1;SCP2;ACSL3;ACADM;MUT
																											Activation of RAS in B cells	2021-02-05	0.220948	0.438716	3.05264	4.60897	NRAS;KRAS
																											Beta-oxidation of myristoyl-CoA to lauroyl-CoA	2021-02-05	0.220948	0.438716	3.05264	4.60897	ACADVL;ACADM
																											Chk1/Chk2(Cds1)-mediated inactivation of cyclin B-Cdk1 complex	2021-02-05	0.220948	0.438716	3.05264	4.60897	CHEK1;CDK1
																											Cleavage of a damaged pyrimidine	2021-02-05	0.220948	0.438716	3.05264	4.60897	SMUG1;MBD4
																											Cyclin B2-mediated events	2021-02-05	0.220948	0.438716	3.05264	4.60897	CDK1;CDC25A
																											ERK activation	2021-02-05	0.220948	0.438716	3.05264	4.60897	CDK1;MAPK3
																											G2 phase pathway	2021-02-05	0.220948	0.438716	3.05264	4.60897	CCNA2;E2F1
																											GRB7 events in ERBB2 signaling	2021-02-05	0.220948	0.438716	3.05264	4.60897	GRB7;ERBB2
																											NOSTRIN-mediated endothelial NOS trafficking	2021-02-05	0.220948	0.438716	3.05264	4.60897	WASL;DNM2
																											Sulfide oxidation to sulfate	2021-02-05	0.220948	0.438716	3.05264	4.60897	ETHE1;SLC25A10
																											T cell signal transduction	18/83	0.222399	0.440963	1.26889	1.90751	VAV3;MAP3K2;NFAT5;PRKCI;MAP3K1;NFATC3;CBL;MAPK10;MAPK9;NRAS;CSK;KRAS;SOS1;MAPK6;SOS2;MAP3K4;NCK1;MAPK3
																											Syndecan 2 pathway	1933-08-01	0.228836	0.453076	1.46576	2.16163	ITGB1;SDCBP;CASP3;TRAPPC4;RASA1;CASK;BAX;MAPK3
																											p38 alpha/beta MAPK downstream pathway	1938-09-01	0.230791	0.455108	1.42158	2.08438	ATF1;ELK4;MEF2A;CREB1;EIF4EBP1;HBP1;EIF4E;RAB5A;USF1
																											Androgen receptor regulation of biosynthesis and transcription	1953-12-01	0.23124	0.455108	1.34082	1.96337	NCOA1;RXRB;GSK3B;HSP90AA1;CREBBP;APPBP2;EHMT2;TRIM24;NR2C2;SIRT1;NR2C1;SENP1
																											CARM1 transcriptional regulation by protein methylation	2021-04-14	0.232831	0.455108	1.83183	2.66978	CREBBP;CREB1;PRKAR1A;NCOA3
																											Initiation of the second proteolytic cleavage of Notch receptor by receptor-ligand binding	2021-04-14	0.232831	0.455108	1.83183	2.66978	ADAM17;ADAM10;RPS27A;UBA52
																											Porphyrin metabolism	2021-04-14	0.232831	0.455108	1.83183	2.66978	UROD;UROS;HMBS;HMOX2
																											S1P/S1P4 pathway	2021-04-14	0.232831	0.455108	1.83183	2.66978	CDC42;GNA13;GNAI3;MAPK3
																											T cell receptor/JNK pathway	2021-04-14	0.232831	0.455108	1.83183	2.66978	MAP3K1;CRK;MAP3K7;CRKL
																											T cell receptor/Ras pathway	2021-04-14	0.232831	0.455108	1.83183	2.66978	NRAS;BRAF;KRAS;MAPK3
																											TRAF3-dependent IRF activation pathway	2021-04-14	0.232831	0.455108	1.83183	2.66978	CREBBP;MAVS;SIKE1;TBK1
																											Differentiation pathway in PC12 cells	18/84	0.238624	0.465773	1.24959	1.7905	ATF1;MAP3K2;CREBBP;MAP3K1;SRF;PLCL1;BRAF;PTPN11;MAPK10;MAPK9;NRAS;RAP1A;AKT2;GNAQ;AKT1;KRAS;PLCD3;MAP3K4
																											Chemokine signaling pathway	38/189	0.242367	0.472411	1.15352	1.63488	GSK3B;ROCK1;ROCK2;GNAI3;ARRB1;PIK3R1;PIK3CB;WASL;CRKL;IKBKB;CDC42;GNG10;NRAS;RAP1A;AKT2;ADRBK1;GRK6;AKT1;CSK;MAPK3;LYN;VAV3;CHUK;STAT1;STAT3;BRAF;PTK2;TIAM1;PIK3CA;GNB2;ELMO1;GNB4;KRAS;DOCK2;SOS1;CRK;SOS2;BCAR1
																											Seven transmembrane receptor signaling through beta-arrestin	16/74	0.243541	0.472552	1.26387	1.78517	MAP3K2;MAP3K1;PDE4D;ACTB;PPP2CA;MAPK10;MAPK9;PDE12;AKT2;GRK6;AKT1;PDE5A;MAPK6;PDE8A;MAP3K4;MAPK3
																											Calcineurin in effects in keratinocyte differentiation	2021-05-19	0.244837	0.472552	1.63562	2.30158	CDKN1A;GNAQ;SP3;NFATC3;CALM1
																											Eicosanoid biosynthesis	2021-05-19	0.244837	0.472552	1.63562	2.30158	PNPLA8;PTGES2;LTA4H;GGT1;PTGES
																											Hypoxic and oxygen homeostasis regulation of HIF-1-alpha	2021-05-19	0.244837	0.472552	1.63562	2.30158	EGLN1;HSP90AA1;NAA10;TCEB2;HIF1A
																											IGF-1 receptor and longevity	2021-05-19	0.244837	0.472552	1.63562	2.30158	PIK3CA;CAT;AKT1;PIK3R1;SOS1
																											STAT3 pathway	2021-05-19	0.244837	0.472552	1.63562	2.30158	CISH;SLTM;STAT3;JAK1;MAPK3
																											Signaling by NODAL	2021-05-19	0.244837	0.472552	1.63562	2.30158	SMAD2;DRAP1;SMAD4;FURIN;TDGF1
																											Caspase cascade in apoptosis	13/59	0.250273	0.482029	1.29464	1.79334	APP;MAP3K1;NUMA1;LIMK1;XIAP;PTK2;KRT18;CASP3;CFL2;AKT1;BAX;TOP1;FADD
																											Endogenous Toll-like receptor signaling	2021-06-24	0.251144	0.482029	1.52663	2.10939	IKBKB;VCAN;CHUK;HMGB1;IRAK4;HSPD1
																											Ras-independent pathway in NK cell-mediated cytotoxicity	2021-06-24	0.251144	0.482029	1.52663	2.10939	ITGB1;SYK;PIK3CA;PIK3R1;B2M;MAPK3
																											Triacylglyceride biosynthesis	2021-06-24	0.251144	0.482029	1.52663	2.10939	AGPAT5;GNPAT;GK;GPAM;AGPS;AGPAT2
																											Glycerolipid metabolism	1949-11-01	0.25382	0.486119	1.32599	1.81811	ALDH3A2;DGKD;ALDH2;GK;GPAM;AKR1A1;AKR1B1;MBOAT2;LCLAT1;DGKZ;AGPAT2
																											CDO in myogenesis	2021-07-29	0.254332	0.486119	1.45729	1.9952	CDC42;MEF2A;SPAG9;TCF12;CTNNA1;BNIP2;TCF4
																											Thyroid cancer	2021-07-29	0.254332	0.486119	1.45729	1.9952	RXRB;NRAS;NCOA4;CCDC6;BRAF;KRAS;MAPK3
																											C-Myb transcription factor network	18/85	0.255322	0.486605	1.23087	1.68042	CDKN1A;CREBBP;ZFHX3;UBE2I;IQGAP1;ATP2B1;NLK;NRAS;NCOR1;CDK6;TRIM28;SIN3A;KIT;TOM1;MCM4;KRAS;TAB2;MAP3K7
																											Cysteine and methionine metabolism	1934-08-01	0.255644	0.486605	1.4093	1.92224	AHCY;AHCYL1;AMD1;APIP;MTR;MAT2B;ENOPH1;TRDMT1
																											Ephrin receptor A forward pathway	1934-08-01	0.255644	0.486605	1.4093	1.92224	LYN;VAV3;YES1;ROCK1;CBL;CRK;CRKL;EPHA2
																											Activation of Src by protein tyrosine phosphatase alpha	2021-03-10	0.260739	0.490886	1.96248	2.63804	CDK1;CSK;CDC25A
																											Activation of the AP-1 family of transcription factors	2021-03-10	0.260739	0.490886	1.96248	2.63804	MAPK10;MAPK9;MAPK3
																											Apoptotic DNA fragmentation and tissue homeostasis	2021-03-10	0.260739	0.490886	1.96248	2.63804	TOP2A;CASP3;HMGB1
																											Glycoprotein 1b-IX-V activation signaling	2021-03-10	0.260739	0.490886	1.96248	2.63804	FLNA;PIK3R1;YWHAZ
																											Phospholipase C signaling pathway	2021-03-10	0.260739	0.490886	1.96248	2.63804	PIK3CA;AKT1;PIK3R1
																											Purine catabolism	2021-03-10	0.260739	0.490886	1.96248	2.63804	NT5C;GPX1;CAT
																											Reduction of cytosolic calcium levels	2021-03-10	0.260739	0.490886	1.96248	2.63804	ATP2B4;ATP2A2;ATP2B1
																											Zinc influx into cells by the SLC39 gene family	2021-03-10	0.260739	0.490886	1.96248	2.63804	SLC39A6;SLC39A10;SLC39A3
																											Tight junction	27/133	0.268672	0.505133	1.16716	1.53396	GNAI3;F11R;MLLT4;ACTB;CDC42;PPP2CA;NRAS;PPP2R1B;PPP2R1A;AKT2;EPB41L2;CTNNA1;AKT1;MPDZ;MYH10;JAM3;PRKCI;YES1;CASK;MPP5;INADL;OCLN;VAPA;CDK4;EXOC3;MYH9;KRAS
																											Calcium signaling by HBx of hepatitis B virus	2021-04-15	0.275641	0.514033	1.66519	2.14586	CREB1;SOS1;LAMTOR5;MAPK3
																											Fibrinolysis pathway	2021-04-15	0.275641	0.514033	1.66519	2.14586	ZFHX3;SERPINE1;F13A1;UBA1
																											Glycosphingolipid biosynthesis: ganglio series	2021-04-15	0.275641	0.514033	1.66519	2.14586	HEXB;HEXA;SLC33A1;ST3GAL1
																											Lagging strand processive biosynthesis	2021-04-15	0.275641	0.514033	1.66519	2.14586	POLA1;FEN1;PCNA;POLD2
																											Sema3A/PAK-dependent axon repulsion	2021-04-15	0.275641	0.514033	1.66519	2.14586	HSP90AA1;LIMK1;PAK2;PLXNA4
																											TrkA receptor signaling pathway	2021-04-15	0.275641	0.514033	1.66519	2.14586	PIK3CA;AKT1;PIK3R1;SOS1
																											VEGF signaling pathway	16/76	0.280041	0.520535	1.22159	1.55486	NFAT5;PLA2G12A;SPHK2;BAD;SPHK1;NFATC3;PIK3CB;PIK3R1;PTK2;CDC42;NRAS;PIK3CA;AKT2;AKT1;KRAS;MAPK3
																											Negative regulation of FGFR signaling	1940-09-01	0.281534	0.520535	1.32971	1.6854	PPP2CA;PPP2R1A;BRAF;PTPN11;CBL;RPS27A;FGF2;UBA52;MAPK3
																											Estrogen receptor signaling pathway	2021-05-20	0.281921	0.520535	1.52648	1.93272	MAPK9;CREB1;PIK3CA;AKT1;BRAF
																											Hypertrophy pathway	2021-05-20	0.281921	0.520535	1.52648	1.93272	WDR1;IFRD1;EIF4EBP1;ADAM10;EIF4E
																											Arf6 signal transduction regulation	1935-08-01	0.283353	0.520535	1.35702	1.71128	CYTH2;ACAP2;GNAQ;ARRB1;FBXO8;GIT1;NCK1;EPHA2
																											Autophagy regulation	1935-08-01	0.283353	0.520535	1.35702	1.71128	BECN1;PRKAA1;ATG4C;ULK3;ATG4B;GABARAP;ATG5;ATG4D
																											Phase II of biological oxidations: conjugation	15/71	0.283934	0.520535	1.227	1.54481	GSTM4;AHCY;GSTO1;MGST3;GSS;MGST1;MTR;MAT2B;CNDP2;GGCT;UGDH;GCLC;UGP2;GGT1;GCLM
																											RIG-I-like receptor signaling pathway	15/71	0.283934	0.520535	1.227	1.54481	DDX3X;MAP3K1;CHUK;TANK;IKBKB;MAPK10;MAPK9;SIKE1;MAVS;TBK1;RNF125;PIN1;FADD;MAP3K7;ATG5
																											Alpha-9 beta-1 integrin pathway	2021-06-25	0.284226	0.520535	1.44619	1.81929	ITGB1;SPP1;F13A1;SAT1;BCAR1;TGM2
																											Metal ion solute carrier family (SLC) transporters	2021-06-25	0.284226	0.520535	1.44619	1.81929	SLC30A7;SLC30A6;SLC39A6;SLC39A10;SLC30A1;SLC39A3
																											SHC1 events in ERBB2 signaling	2021-06-25	0.284226	0.520535	1.44619	1.81929	NRAS;ERBB2;CDK1;KRAS;SOS1;MAPK3
																											Apoptosis intrinsic pathway	2021-07-30	0.284408	0.520535	1.39384	1.75254	BAD;CASP3;E2F1;XIAP;AKT1;BAX;BAK1
																											MicroRNAs in muscle cell differentiation	2021-07-30	0.284408	0.520535	1.39384	1.75254	MEF2A;PRKCI;PRKAR1A;PRKD3;SRF;ID2;EZH2
																											O-glycan biosynthesis	2021-07-30	0.284408	0.520535	1.39384	1.75254	GALNT7;GALNT11;C1GALT1C1;GALNT13;GALNT1;C1GALT1;ST3GAL1
																											Acyl chain remodeling of cardiolipin	2021-02-06	0.293879	0.533622	2.28934	2.8035	TAZ;LCLAT1
																											Beta-oxidation of very long chain fatty acids	2021-02-06	0.293879	0.533622	2.28934	2.8035	ACOT8;HSD17B4
																											Cell cycle negative regulation by p75 neurotrophin receptor	2021-02-06	0.293879	0.533622	2.28934	2.8035	HDAC2;HDAC3
																											Methionine salvage pathway	2021-02-06	0.293879	0.533622	2.28934	2.8035	APIP;ENOPH1
																											Phosphorylation of Emi1	2021-02-06	0.293879	0.533622	2.28934	2.8035	FZR1;CDK1
																											Telomere extension by telomerase	2021-02-06	0.293879	0.533622	2.28934	2.8035	RUVBL2;NHP2
																											Regular glucocorticoid receptor pathway	17/82	0.294399	0.533865	1.19806	1.46502	NCOA1;GSK3B;SMARCD1;CDKN1A;HSP90AA1;HDAC2;CREBBP;TSG101;STAT1;MAPK10;MAPK9;PPP5C;CREB1;IL5;AKT1;BAX;MAPK3
																											Cytosolic DNA-sensing pathway	1956-12-01	0.295929	0.535934	1.24917	1.52104	IKBKB;PYCARD;MAVS;TBK1;CHUK;POLR3B;POLR3D;POLR1C;POLR1D;POLR3G;POLR3H;POLR3K
																											T cell receptor signaling in naive CD4+ T cells	14/67	0.308449	0.556508	1.2099	1.42309	CHUK;PTPN11;CBL;MALT1;IKBKB;CDC42;NRAS;RAP1A;AKT1;FLNA;CSK;KRAS;SOS1;NCK1
																											Chagas disease	21/104	0.310089	0.556508	1.15903	1.3571	SMAD2;CHUK;IFNGR1;SERPINE1;GNAI3;PIK3R1;PIK3CB;IRAK4;TGFBR1;IKBKB;PPP2CA;MAPK10;MAPK9;PPP2R1B;PIK3CA;PPP2R1A;AKT2;GNAQ;AKT1;FADD;MAPK3
																											Phospholipids as signaling intermediaries	1936-08-01	0.311781	0.556508	1.30847	1.52496	ASAH1;PIK3CA;SPHK1;AKT1;PIK3R1;SOS1;PTK2;MAPK3
																											Apoptotic cleavage of cell adhesion proteins	2021-03-11	0.314136	0.556508	1.71707	1.98824	OCLN;CASP3;DSG2
																											E2F1 destruction pathway	2021-03-11	0.314136	0.556508	1.71707	1.98824	CUL1;E2F1;SKP2
																											Folate biosynthesis	2021-03-11	0.314136	0.556508	1.71707	1.98824	GCH1;FPGS;GGH
																											Glypican-3 pathway	2021-03-11	0.314136	0.556508	1.71707	1.98824	MAPK9;MDK;FURIN
																											Methylation	2021-03-11	0.314136	0.556508	1.71707	1.98824	AHCY;MTR;MAT2B
																											Vitamin B5 (pantothenate) metabolism	2021-03-11	0.314136	0.556508	1.71707	1.98824	PANK4;PANK3;AASDHPPT
																											Keratan sulfate/keratin metabolism	2021-07-31	0.315266	0.556508	1.33569	1.54183	B4GALT2;B4GALT3;HEXB;HEXA;B3GNT2;ST3GAL6;ST3GAL1
																											RNA polymerase I promoter opening	2021-07-31	0.315266	0.556508	1.33569	1.54183	HIST1H3A;H2AFX;HIST1H2AJ;MBD2;HIST2H2BE;MAPK3;HIST1H2BC
																											Glycosaminoglycan biosynthesis: heparan sulfate	2021-06-26	0.318167	0.556508	1.3738	1.57325	NDST1;EXTL2;HS3ST3A1;B3GAT3;B4GALT7;HS2ST1
																											RXR/VDR pathway	2021-06-26	0.318167	0.556508	1.3738	1.57325	RXRB;ABCA1;NCOA1;MED1;RPS6KB1;NR1H2
																											Selenoamino acid metabolism	2021-06-26	0.318167	0.556508	1.3738	1.57325	AHCY;AHCYL1;WBSCR22;MAT2B;GGT1;SEPHS1
																											Mechanism of gene regulation by peroxisome proliferators via PPAR-alpha	1957-12-01	0.318556	0.556508	1.22134	1.39716	NCOA1;MED1;HSP90AA1;CREBBP;NCOR1;PIK3CA;PRKAR1A;FAT1;SRA1;HSD17B4;PIK3R1;MAPK3
																											Amino acid biosynthesis and interconversion (transamination)	2021-04-16	0.319562	0.556508	1.52634	1.74125	CCBL1;PYCR1;PHGDH;GLS
																											CRMPs in Sema3A signaling	2021-04-16	0.319562	0.556508	1.52634	1.74125	GSK3B;DPYSL2;DPYSL3;PLXNA4
																											Cell death signaling by NRIF in the nucleus	2021-04-16	0.319562	0.556508	1.52634	1.74125	PSENEN;RPS27A;UBA52;ITGB3BP
																											Control of cell cycle and breast tumor growth by estrogen-responsive protein Efp	2021-04-16	0.319562	0.556508	1.52634	1.74125	CDK7;CDK6;CDK4;CDK1
																											DNA-PK pathway in nonhomologous end joining	2021-04-16	0.319562	0.556508	1.52634	1.74125	XRCC4;PRKDC;XRCC5;LIG4
																											GluR2-containing AMPA receptor trafficking	2021-04-16	0.319562	0.556508	1.52634	1.74125	GRIA2;AP2S1;AP2A1;AP2M1
																											Hypoxia-inducible factor in the cardivascular system	2021-04-16	0.319562	0.556508	1.52634	1.74125	HSP90AA1;CREB1;ASPH;HIF1A
																											Inhibitor of DNA binding (ID) signaling pathway	2021-04-16	0.319562	0.556508	1.52634	1.74125	ELK4;RBL1;ID2;ID1
																											Primary bile acid biosynthesis	2021-04-16	0.319562	0.556508	1.52634	1.74125	AMACR;SCP2;HSD17B4;SLC27A5
																											Rap1 signaling	2021-04-16	0.319562	0.556508	1.52634	1.74125	RAP1GAP2;RAP1A;YWHAZ;PRKG1
																											Selenium metabolism and selenoproteins	2021-04-16	0.319562	0.556508	1.52634	1.74125	EEFSEC;RPL30;SP3;TRNAU1AP
																											Serotonin receptor 2 and ELK-SRF/GATA4 signaling	2021-04-16	0.319562	0.556508	1.52634	1.74125	ELK4;SRF;GNAQ;MAPK3
																											Cytosolic sensors of pathogen-associated DNA	2021-05-21	0.319968	0.556508	1.43099	1.63066	IKBKB;APP;TBK1;CHUK;HMGB1
																											PKC-catalyzed phosphorylation of inhibitory phosphoprotein of myosin phosphatase	2021-05-21	0.319968	0.556508	1.43099	1.63066	GNA13;PPP1R14A;ROCK1;GNAQ;ARHGAP5
																											Prion pathway	2021-05-21	0.319968	0.556508	1.43099	1.63066	PRNP;HSPA5;LAMB1;LAMC1;NFE2L2
																											p38 MK2 pathway	2021-05-21	0.319968	0.556508	1.43099	1.63066	CREB1;SRF;ETV1;YWHAZ;YWHAG
																											L1CAM interactions	19/94	0.320533	0.556508	1.16042	1.32029	ITGB1;CNTN6;CLTC;RDX;RANBP9;AP2A1;LAMB1;LAMC1;DNM2;SDCBP;DLG1;CHL1;DPYSL2;RPS6KA1;AP2S1;CD24;AP2M1;SPTBN1;MAPK3
																											Toll-like receptor signaling pathway regulation	28/142	0.320597	0.556508	1.12521	1.28001	CUEDC2;PIK3R1;PIK3CB;IKBKB;MAPK9;TBK1;AKT2;MLST8;SPP1;AKT1;FADD;MAP2K7;MAP3K7;MAPK3;IFNAR2;FBXW5;CISH;CHUK;SYK;STAT1;IRAK4;RNF41;MAPK10;PIK3CA;TAB3;TAB2;ZMYND11;IFNAR1
																											Bladder cancer	1942-09-01	0.334953	0.580698	1.24896	1.36607	CDKN1A;NRAS;CDK4;ERBB2;ARAF;E2F1;BRAF;KRAS;MAPK3
																											Glycerophospholipid metabolism	16/79	0.337797	0.584894	1.1632	1.26244	PLA2G12A;DGKD;LPGAT1;PCYT1A;EPT1;MBOAT2;TAZ;LCLAT1;DGKZ;AGPAT2;GNPAT;PTDSS2;GPAM;GPD2;PEMT;CEPT1
																											Phagosome	30/154	0.338489	0.585357	1.1083	1.20059	ATP6V1A;ITGB1;COLEC12;DYNC1I2;ITGAM;TFRC;ITGB5;TUBAL3;ACTB;EEA1;TUBB6;LAMP2;MRC1;OLR1;ATP6V1D;RILP;ATP6V1C1;ATP6V1F;DYNC1H1;ATP6V1G1;ATP6V0B;ATP6V0E1;TUBB4B;DYNC1LI1;DYNC1LI2;PIKFYVE;CANX;ATP6V1B2;SEC22B;RAB5A
																											FRA pathway	1937-08-01	0.340747	0.587055	1.26328	1.36006	CCNA2;GJA1;DMTF1;NFATC3;TXLNG;JUNB;USF2;ATF4
																											Latent infection of Homo sapiens with Mycobacterium tuberculosis	1937-08-01	0.340747	0.587055	1.26328	1.36006	ATP6V1A;ATP6V0B;ATP6V1G1;ATP6V0E1;ATP6V1B2;ATP6V1D;ATP6V1C1;ATP6V1F
																											Platelet aggregation (plug formation)	1937-08-01	0.340747	0.587055	1.26328	1.36006	RAP1A;SYK;AKT1;CSK;SOS1;CRK;PTK2;BCAR1
																											Alanine, aspartate and glutamate metabolism	1932-07-01	0.346671	0.595774	1.28218	1.35831	ADSL;CPS1;PPAT;GFPT1;ASL;ADSS;GLS
																											Sphingolipid de novo biosynthesis	1932-07-01	0.346671	0.595774	1.28218	1.35831	COL4A3BP;SPTLC1;VAPA;SPHK2;SPHK1;KDSR;CSNK1G2
																											Starch and sucrose metabolism	1953-11-01	0.348109	0.597207	1.19941	1.26567	GPI;PYGB;GYS1;UGDH;UGP2;UXS1;AGL;ENPP1;PGM1;PGM2L1;HK1
																											Leukocyte transendothelial migration	23/117	0.348371	0.597207	1.12074	1.18181	VASP;ITGB1;VAV3;ITGAM;ROCK1;ROCK2;CTNND1;GNAI3;PTPN11;PIK3R1;PIK3CB;F11R;ARHGAP5;MLLT4;ACTB;PTK2;CDC42;OCLN;RAP1A;PIK3CA;CTNNA1;BCAR1;JAM3
																											Integrin cell surface interactions	17/85	0.350923	0.600835	1.145	1.19903	ITGB1;ITGAM;ITGB5;SYK;LAMB1;LAMC1;F11R;PTK2;RAP1A;BSG;SPP1;AKT1;CSK;SOS1;CRK;BCAR1;JAM3
																											Myometrial relaxation and contraction pathways	30/155	0.352631	0.601566	1.09937	1.14591	ATF1;CAMK2D;ITPR2;ATP2A2;ARRB1;ACTB;CNN2;CNN1;GJA1;CALD1;GRK6;GABPA;YWHAG;GSTO1;IGFBP3;PDE4D;DGKZ;YWHAZ;CREB3;CREB1;PRKAR1A;GNAQ;GNB2;MAFF;GNB4;RGS10;ACKR3;CALM1;PKIG;ATF4
																											Bile acid and bile salt metabolism	2021-06-27	0.352657	0.601566	1.3083	1.36359	ACOT8;AMACR;SCP2;SLCO1B3;HSD17B4;SLC27A5
																											TNF/stress-related signaling	2021-06-27	0.352657	0.601566	1.3083	1.36359	ATF1;IKBKB;MAP3K1;CHUK;MAP2K7;TANK
																											Wnt signaling pathway	44/231	0.353943	0.603015	1.07796	1.11958	GPI;GSK3B;NFAT5;CAMK2D;CTBP2;ROCK1;ROCK2;CHD8;CUL1;ARRB1;NLK;LRP6;SOX2;PPP2CA;MAPK9;GJA1;CCND3;FRAT2;PPP2R1B;PPP2R1A;PPP2R5E;AKT2;AKT1;MAP3K7;SMAD2;CSNK1G3;PRKCI;CREBBP;SMAD4;WNT5B;CSNK1A1;RYK;NFATC3;PPP2R5C;SENP2;PYGO1;MAPK10;DAAM1;APC;TBL1XR1;PIN1;MDFI;CSNK1G2;PAFAH1B1
																											HES/HEY pathway	1948-10-01	0.355001	0.604071	1.20511	1.24805	NCOA1;CAMK2D;CREBBP;NCOR1;STAT3;ID1;E2F1;RBPJ;HIF1A;RUNX2
																											CCR3 signaling in eosinophils	2021-05-22	0.358543	0.6048	1.34673	1.38135	ROCK2;GNAQ;LIMK1;PTK2;MAPK3
																											Atypical NF-kappaB pathway	2021-04-17	0.36393	0.6048	1.40884	1.42404	IKBKB;SYK;PIK3CA;PIK3R1
																											Chromatin remodeling by hSWI/SNF ATP-dependent complexes	2021-04-17	0.36393	0.6048	1.40884	1.42404	GTF2A1;SMARCD1;SMARCB1;ACTB
																											Osteoclast signaling	2021-04-17	0.36393	0.6048	1.40884	1.42404	ATP6V1G1;SPP1;TNFRSF11B;IFNAR1
																											Synaptic proteins at the synaptic junction	2021-04-17	0.36393	0.6048	1.40884	1.42404	DLG1;GUK1;CASK;SPTBN1
																											TAK1-mediated activation of p38 MAPK	2021-04-17	0.36393	0.6048	1.40884	1.42404	RIPK2;TAB3;TAB2;MAP3K7
																											Apoptotic factor-mediated response	2021-02-07	0.365708	0.6048	1.83136	1.8422	CASP3;XIAP
																											Arachidonate epoxygenase/epoxide hydrolase pathway	2021-02-07	0.365708	0.6048	1.83136	1.8422	COX8A;COX5A
																											Attachment of GPI anchor to uPAR	2021-02-07	0.365708	0.6048	1.83136	1.8422	PGAP1;PIGK
																											BAD activation and translocation to mitochondria	2021-02-07	0.365708	0.6048	1.83136	1.8422	BAD;AKT1
																											Homologous DNA pairing and strand exchange	2021-02-07	0.365708	0.6048	1.83136	1.8422	BRIP1;RAD51
																											Integrin alpha-2b beta-3 signaling	2021-02-07	0.365708	0.6048	1.83136	1.8422	CSK;PTK2
																											MEK activation	2021-02-07	0.365708	0.6048	1.83136	1.8422	NRAS;KRAS
																											Nectin/Necl trans heterodimerization	2021-02-07	0.365708	0.6048	1.83136	1.8422	CADM1;PVR
																											Post-transcriptional silencing by small RNAs	2021-02-07	0.365708	0.6048	1.83136	1.8422	TNRC6A;TNRC6B
																											SARS coronavirus protease	2021-02-07	0.365708	0.6048	1.83136	1.8422	FBL;EIF4E
																											Viral dsRNA-TLR3-TRIF complex activation of RIP1	2021-02-07	0.365708	0.6048	1.83136	1.8422	IKBKB;CHUK
																											MAPK signaling pathway	59/314	0.366996	0.6048	1.06004	1.06259	ATF1;ARAF;ARRB1;ECSIT;FGF2;DUSP16;CRKL;ELK4;IKBKB;AKT2;CASP3;RPS6KA1;AKT1;MAP3K7;MAP3K4;MEF2A;DUSP5;PLA2G12A;DUSP3;CHUK;TGFBR1;PPM1A;PPM1B;CREB1;RASA1;RAPGEF2;SOS1;CRK;SOS2;ATF4;SRF;NLK;STK4;NR2C2;STK3;CDC42;MAPK9;NRAS;RAP1A;EIF4EBP1;FLNA;FLNC;MAP2K7;MAPK6;PAK2;EIF4E;MAP4K3;MAPK3;MAP3K2;MAP3K1;HSPA5;STAT1;BRAF;MAPK10;PPP5C;TAOK2;TAB2;KRAS;LAMTOR3
																											Activation of chaperones by ATF6 alpha	2021-03-12	0.367701	0.6048	1.52619	1.52693	HSPA5;ATF4;HSP90B1
																											BMP signaling and regulation	2021-03-12	0.367701	0.6048	1.52619	1.52693	SMAD4;RUNX2;BMPR1A
																											Granzyme A-mediated apoptosis pathway	2021-03-12	0.367701	0.6048	1.52619	1.52693	CREBBP;APEX1;CASP3
																											Hormone-sensitive lipase (HSL)-mediated triacylglycerol hydrolysis	2021-03-12	0.367701	0.6048	1.52619	1.52693	PPP1CB;PPP1CC;PPP1CA
																											Iron metabolism in placenta	2021-03-12	0.367701	0.6048	1.52619	1.52693	TFRC;IREB2;MCOLN1
																											Parkin role in the ubiquitin-proteasomal pathway	2021-03-12	0.367701	0.6048	1.52619	1.52693	UBE2F;SUMO1;UBE2E2
																											Phosphatidylethanolamine biosynthesis	2021-03-12	0.367701	0.6048	1.52619	1.52693	EPT1;CEPT1;LPIN2
																											Platelet endothelial cell adhesion molecule 1 (PECAM1) interactions	2021-03-12	0.367701	0.6048	1.52619	1.52693	LYN;YES1;PTPN11
																											Pyrimidine catabolism	2021-03-12	0.367701	0.6048	1.52619	1.52693	NT5C;NT5C3A;UPP1
																											SRF and microRNAs in smooth muscle differentiation and proliferation	2021-03-12	0.367701	0.6048	1.52619	1.52693	MEF2A;CAMK2D;SRF
																											G alpha i pathway	21/108	0.378325	0.621534	1.10547	1.07452	MAP3K2;PRKCI;MAP3K1;STAT3;ITPR2;BRAF;PIK3CB;MAPK10;MAPK9;NRAS;RAP1A;AKT2;GRK6;RGS10;AKT1;KRAS;SOS1;MAPK6;SOS2;MAP3K4;MAPK3
																											LPA receptor mediated events	13/65	0.380014	0.623566	1.14484	1.10768	LYN;GSK3B;GNAI3;PIK3CB;PIK3R1;PTK2;GNA13;TIAM1;CASP3;GNAQ;AKT1;CRK;BCAR1
																											Ceramide signaling pathway	1949-10-01	0.380945	0.624352	1.17414	1.13316	ASAH1;MAP3K1;SPHK2;BAD;AKT1;PAWR;BAX;FADD;CTSD;MAPK3
																											Interleukin receptor SHC signaling	2021-06-28	0.387399	0.633239	1.24876	1.1842	IL5;PIK3CA;PIK3CB;PIK3R1;SOS1;JAK1
																											Phosphatidic acid biosynthesis	2021-06-28	0.387399	0.633239	1.24876	1.1842	AGPAT5;GNPAT;PLA2G12A;GPAM;AGPAT2;LCLAT1
																											EGFR1 pathway	29/152	0.387744	0.633239	1.07983	1.02305	PRPS1;NUP205;CDKN1A;GRN;ITGB5;PDCD5;AMD1;ARHGAP1;DDX21;CCNC;PKMYT1;CDC42;CA2;PPAT;E2F1;SPP1;MYBL2;PHLDA1;ADSS;RANBP1;ADSL;ACOT7;IGFBP3;CDK9;ESPL1;CDK4;LUC7L3;YPEL5;TRIB2
																											RAGE pathway	1960-12-01	0.388396	0.633553	1.1448	1.08267	ITGB1;GJA1;CASP3;ID2;SERPINE1;ID1;SCAP;TNFRSF11B;TRMT1;HMGCR;RUNX2;PTGES
																											Modulation of interferon signaling by chaperones	2021-05-23	0.397239	0.64362	1.27184	1.17418	IKBKB;CHUK;IFNGR1;DNAJA3;TAX1BP3
																											Nitrogen metabolism	2021-05-23	0.397239	0.64362	1.27184	1.17418	CA12;HAL;CPS1;CA2;GLS
																											Progesterone-initiated oocyte maturation	2021-05-23	0.397239	0.64362	1.27184	1.17418	PRKAR1A;RPS6KA1;CDK1;PIN1;MAPK3
																											Signaling events mediated by the hedgehog family	2021-05-23	0.397239	0.64362	1.27184	1.17418	STIL;PIK3CA;ADRBK1;AKT1;PIK3R1
																											T cell receptor signaling in naive CD8+ T cells	1955-11-01	0.397365	0.64362	1.14476	1.05649	IKBKB;NRAS;RAP1A;CHUK;AKT1;CSK;KRAS;SOS1;CBL;B2M;MALT1
																											Vibrio cholerae infection	1955-11-01	0.397365	0.64362	1.14476	1.05649	ATP6V1A;SLC12A2;ATP6V0B;ATP6V1G1;ATP6V0E1;ATP6V1B2;KDELR2;ATP6V1D;ACTB;ATP6V1C1;ATP6V1F
																											Platelet homeostasis	16/82	0.39787	0.643682	1.11013	1.02313	ATP2B4;ATP2A2;ITPR2;PTPN11;PPP2R5C;ATP2B1;PPP2CA;GNG10;PPP2R1B;PPP2R1A;PPP2R5E;GNB2;GNB4;PDE5A;MRVI1;PRKG1
																											Angiotensin II-mediated activation of JNK pathway via Pyk2-dependent signaling	1939-08-01	0.399568	0.645673	1.18163	1.08399	MEF2A;MAP3K1;GNAQ;CALM1;SOS1;BCAR1;CRKL;MAPK3
																											Phosphatidylcholine biosynthesis	2021-04-18	0.408148	0.657996	1.30813	1.17225	PCYT1A;PEMT;CEPT1;LPIN2
																											TNFR2 signaling pathway	2021-04-18	0.408148	0.657996	1.30813	1.17225	IKBKB;MAP3K1;CHUK;TANK
																											EPO receptor signaling	1934-07-01	0.410221	0.660565	1.18706	1.05774	CISH;STAT1;RASA1;STAT3;AKT1;SOS1;MAPK3
																											Lysosome	23/121	0.414731	0.66705	1.07473	0.945898	CD164;ATP6V0B;ASAH1;SORT1;HEXB;CLTC;HEXA;AP1B1;AP4E1;CLTB;AP3B1;NAGPA;MCOLN1;IGF2R;AP4M1;AP3M1;GGA1;GNPTAB;AP1G1;LAMP2;AP1S1;CTSF;CTSD
																											RhoA signaling pathway	1945-09-01	0.417535	0.670778	1.14467	0.999743	ITGB1;CDC42;PPP1R12A;ROCK1;ROCK2;SRF;LIMK1;RDX;PKN2
																											Alpha-hemoglobin stabilizing enzyme (AHSP) pathway	2021-03-13	0.420456	0.670786	1.37349	1.19001	UROD;UROS;HMBS
																											Chondroitin sulfate/dermatan sulfate degradation	2021-03-13	0.420456	0.670786	1.37349	1.19001	VCAN;HEXB;HEXA
																											Double stranded RNA-induced gene expression	2021-03-13	0.420456	0.670786	1.37349	1.19001	DNAJC3;CHUK;EIF2S2
																											Interleukin-22 soluble receptor signaling pathway	2021-03-13	0.420456	0.670786	1.37349	1.19001	STAT1;STAT3;JAK1
																											NICD trafficking to the nucleus	2021-03-13	0.420456	0.670786	1.37349	1.19001	CREBBP;SNW1;RBPJ
																											Signal attenuation	2021-03-13	0.420456	0.670786	1.37349	1.19001	SOS1;CRK;MAPK3
																											Adherens junction actin cytoskeletal organization	2021-06-29	0.422112	0.671874	1.19439	1.03014	CADM1;CTNND1;CTNNA1;CDH12;MLLT4;PVR
																											Post-translational modification: biosynthesis of GPI-anchored proteins	2021-06-29	0.422112	0.671874	1.19439	1.03014	DPM1;DPM3;PGAP1;PIGN;PIGA;PIGK
																											Adipocytokine signaling pathway	13/67	0.42528	0.676136	1.1023	0.942476	PRKAA1;CHUK;STAT3;PTPN11;ACSL3;ADIPOR2;CAMKK2;IKBKB;RXRB;MAPK10;MAPK9;AKT2;AKT1
																											Adipogenesis	25/133	0.431919	0.682907	1.05997	0.889858	CDKN1A;SERPINE1;HIF1A;AGPAT2;ZMPSTE24;NAMPT;E2F1;E2F4;MEF2A;NCOA1;WNT5B;STAT1;STAT3;EBF1;HMGA1;KLF7;CREB1;NCOR1;RBL1;KLF5;SCD;TRIB3;PLIN2;IL6ST;LPIN2
																											Jak-STAT signaling pathway	37/199	0.432059	0.682907	1.04589	0.877706	PIK3R1;PIK3CB;CBL;CCND3;SPRED1;AKT2;PTPMT1;AKT1;IL13RA2;SOCS4;JAK1;SOCS5;IFNAR2;CREBBP;CISH;IFNGR1;STAT1;IL11RA;STAT3;PTPN11;PTPN12;PTPN14;PIAS2;PIAS1;PTP4A1;PTP4A2;IL5;SOAT1;PIK3CA;IL6ST;SOS1;PTPN4;STAM2;SOS2;IRF9;PTPN2;IFNAR1
																											Binding of RNA by insulin-like growth factor 2 mRNA binding proteins (IGF2BPs/IMPs/VICKZs)	2021-02-08	0.434487	0.682907	1.52604	1.27209	IGF2BP3;ACTB
																											Degradation of cysteine and homocysteine	2021-02-08	0.434487	0.682907	1.52604	1.27209	ETHE1;SLC25A10
																											Fatty acid elongation in mitochondria	2021-02-08	0.434487	0.682907	1.52604	1.27209	ECHS1;MECR
																											Hydrolysis of lysophosphatidylcholine (LPC)	2021-02-08	0.434487	0.682907	1.52604	1.27209	PLA2G4C;GPCPD1
																											Lysine catabolism	2021-02-08	0.434487	0.682907	1.52604	1.27209	DLD;AASS
																											Recycling of eIF2-GDP complex	2021-02-08	0.434487	0.682907	1.52604	1.27209	EIF2B4;EIF2S2
																											S6K1 signaling	2021-02-08	0.434487	0.682907	1.52604	1.27209	RPS6KB1;MLST8
																											Support of platelet aggregation by Eph kinases and ephrins	2021-02-08	0.434487	0.682907	1.52604	1.27209	ITGB1;LYN
																											Dorso-ventral axis formation	2021-05-24	0.435685	0.683234	1.20482	1.00101	SPIRE1;KRAS;SOS1;SOS2;MAPK3
																											NF-kappaB signaling pathway	2021-05-24	0.435685	0.683234	1.20482	1.00101	IKBKB;MAP3K1;CHUK;FADD;MAP3K7
																											Ether lipid metabolism	1935-07-01	0.441938	0.691467	1.14459	0.934659	PLA2G12A;AGPS;EPT1;CEPT1;PAFAH1B3;PAFAH2;PAFAH1B1
																											Signal transduction by L1	1935-07-01	0.441938	0.691467	1.14459	0.934659	ITGB1;CLTC;RPS6KA1;AP2S1;AP2A1;AP2M1;MAPK3
																											Apoptosis modulation by HSP70	2021-04-19	0.451698	0.704343	1.22084	0.970256	MAPK10;MAP3K1;CASP3;FADD
																											Platelet calcium homeostasis	2021-04-19	0.451698	0.704343	1.22084	0.970256	ATP2B4;ATP2A2;ITPR2;ATP2B1
																											TP53 network	2021-04-19	0.451698	0.704343	1.22084	0.970256	CDKN1A;SUMO1;BAX;ATM
																											Glutamate binding and activation of AMPA receptors and synaptic plasticity	2021-06-30	0.456538	0.707891	1.14455	0.897425	GRIA2;CAMK2D;DLG1;AP2S1;AP2A1;AP2M1
																											Interferon-beta enhancer pathway	2021-06-30	0.456538	0.707891	1.14455	0.897425	GTF2A1;SMARCD1;CREBBP;SMARCB1;HMGB1;ACTB
																											Signaling pathway from G-protein families	2021-06-30	0.456538	0.707891	1.14455	0.897425	CREB1;PRKAR1A;GNAQ;NFATC3;CALM1;MAPK3
																											TNFR1 signaling pathway	2021-06-30	0.456538	0.707891	1.14455	0.897425	MAP3K1;PRKDC;CASP3;FADD;MAP3K7;PAK2
																											p38-alpha and p38-beta regulation	2021-06-30	0.456538	0.707891	1.14455	0.897425	CDC42;LYN;YES1;CCM2;DUSP16;PAK2
																											Alpha-M beta-2 integrin signaling	1941-08-01	0.458433	0.708959	1.10988	0.86564	LYN;ITGAM;RAP1A;YES1;ROCK1;AKT1;HMGB1;JAM3
																											Bioactive peptide-induced signaling pathway	1941-08-01	0.458433	0.708959	1.10988	0.86564	CAMK2D;PIK3CA;STAT1;STAT3;PIK3R1;CALM1;SOS1;MAPK3
																											NOD signaling pathway	16/85	0.458769	0.708959	1.06167	0.82726	HSP90AA1;CHUK;RIPK2;XIAP;PRDM1;HSP90B1;IKBKB;PYCARD;ERBB2IP;MAPK10;MAPK9;ITCH;TAB3;TAB2;MAP3K7;MAPK3
																											HIV-1 Nef as negative effector of Fas and TNF	1958-11-01	0.471596	0.725304	1.07149	0.805367	MAP3K1;NUMA1;CHUK;PRKDC;CASP3;RASA1;XIAP;FADD;MAP2K7;PAK2;PTK2
																											Glycosphingolipid biosynthesis: globo series	2021-03-14	0.471627	0.725304	1.24855	0.938367	HEXB;HEXA;ST3GAL1
																											Polyamine metabolism	2021-03-14	0.471627	0.725304	1.24855	0.938367	AMD1;APIP;ENOPH1
																											Agrin in postsynaptic differentiation	1947-09-01	0.47258	0.725304	1.0843	0.812733	ITGB1;CDC42;LAMB1;LAMC1;UTRN;PAK2;PTK2;MAPK3;PAK4
																											Nucleotide-binding domain, leucine rich repeat containing receptor (NLR) signaling pathways	1947-09-01	0.47258	0.725304	1.0843	0.812733	IKBKB;PYCARD;APP;ITCH;CHUK;RIPK2;TAB3;TAB2;MAP3K7
																											Regulation of NFAT transcription factors	1947-09-01	0.47258	0.725304	1.0843	0.812733	BATF3;ITCH;IL5;CDK4;CASP3;E2F1;NFATC3;SLC3A2;JUNB
																											Ck1/Cdk5 regulation by type 1 glutamate receptors	2021-05-25	0.47355	0.725304	1.14451	0.855521	PPP2CA;PRKAR1A;ADRBK1;DRD1;PPP1CA
																											Interferon alpha signaling regulation	2021-05-25	0.47355	0.725304	1.14451	0.855521	IFNAR2;STAT1;PTPN11;JAK1;IFNAR1
																											Amyotrophic lateral sclerosis (ALS)	1953-10-01	0.484985	0.741995	1.06466	0.770424	GRIA2;CCS;GPX1;TOMM40;ALS2;BAD;CASP3;CAT;BAX;RAB5A
																											Fatty acid metabolism	1942-08-01	0.487488	0.744998	1.07717	0.773937	ALDH3A2;ACADVL;ECHS1;ALDH2;ACADM;ACSL3;ACOX3;ACADSB
																											Amino acid transport across the plasma membrane	1931-06-01	0.490443	0.745388	1.0987	0.782766	SLC7A6;SLC7A8;SLC3A2;SLC7A11;SLC38A2;SLC7A2
																											NF-kappaB activation by non-typeable Hemophilus influenzae	1931-06-01	0.490443	0.745388	1.0987	0.782766	IKBKB;CREBBP;SMAD4;CHUK;MAP3K7;TGFBR1
																											One-carbon metabolism	1931-06-01	0.490443	0.745388	1.0987	0.782766	AHCY;MTRR;MTHFD1L;MTR;MAT2B;GART
																											Signal amplification	1931-06-01	0.490443	0.745388	1.0987	0.782766	GNA13;GNG10;GNAQ;GNB2;GNAI3;GNB4
																											Stathmin and breast cancer resistance to antimicrotubule agents	1931-06-01	0.490443	0.745388	1.0987	0.782766	CAMK2D;TSG101;HSPA5;PRKAR1A;CDK1;UHMK1
																											4-1BB-dependent immune response	2021-04-20	0.494142	0.748536	1.14447	0.806774	IKBKB;MAP3K1;CHUK;MAP4K5
																											Nerve growth factor (NGF) pathway	2021-04-20	0.494142	0.748536	1.14447	0.806774	PIK3CA;PIK3R1;SOS1;MAPK3
																											Sprouty regulation of tyrosine kinase signals	2021-04-20	0.494142	0.748536	1.14447	0.806774	RASA1;CBL;SOS1;MAPK3
																											ATF2 transcription factor network	1959-11-01	0.496052	0.750605	1.0491	0.7355	CCNA2;DUSP5;MAPK9;CREB1;CBFB;CDK4;RUVBL2;CUL3;BRCA1;JUNB;MAPK3
																											Alpha-4 beta-7 integrin signaling	2021-02-09	0.499	0.751769	1.30796	0.909224	ITGB1;PTK2
																											Gene expression regulation by hypoxia-inducible factor	2021-02-09	0.499	0.751769	1.30796	0.909224	CREBBP;HIF1A
																											West Nile virus infection	2021-02-09	0.499	0.751769	1.30796	0.909224	TIA1;CASP3
																											cAMP receptor, G-protein-independent pathways inferred from amoeba model	2021-02-09	0.499	0.751769	1.30796	0.909224	STAT1;STAT3
																											Inhibition of activated T cell apoptosis by neuropeptides VIP and PACAP	2021-05-26	0.510546	0.768324	1.08995	0.732743	MAP3K1;CHUK;PRKAR1A;GNAQ;CALM1
																											Interleukin-4 regulation of apoptosis	48/267	0.517222	0.777523	1.00328	0.661444	TOP2A;SUV39H2;CDKN1A;ABCD3;ITGAM;MCM7;HSPB8;CLTB;RNF219;F13A1;SPINT2;MED16;OSBPL11;TFPI;ENOX2;UBL3;NFIL3;CA2;CASP3;TP53BP2;SPP1;ENPP1;UPP1;IL13RA2;PPP1R16B;ST6GAL1;DST;RIPK2;STAT1;DENND4A;RDX;PAWR;ELL2;ZDHHC17;HIST2H2BE;CDC25A;RAB11B;DNAJC3;VCAN;DAAM1;KIT;FAT1;MCM4;RBMS1;CD9;MCM5;SOS1;MCM2
																											Selenium pathway	1960-11-01	0.520219	0.778397	1.02763	0.671561	PRDX3;ABCA1;PRDX2;PRDX5;PRDX4;FLAD1;RFK;SERPINE1;CAT;MTR;GGT1
																											AKAP95 role in mitosis and chromosome dynamics	2021-03-15	0.520624	0.778397	1.14443	0.747003	PPP2CA;DDX5;CDK1
																											Activation of IRF3/IRF7 mediated by TBK1/IKK epsilon	2021-03-15	0.520624	0.778397	1.14443	0.747003	TBK1;RPS27A;UBA52
																											Glycosylation of mammalian N-linked oligosaccarides	2021-03-15	0.520624	0.778397	1.14443	0.747003	MAN1A2;MAN1C1;MAN2C1
																											Repression of pain sensation by the transcriptional regulator DREAM	2021-03-15	0.520624	0.778397	1.14443	0.747003	CREB1;PRKAR1A;MAPK3
																											Alpha-synuclein signaling	1932-06-01	0.523622	0.781187	1.05638	0.683464	LYN;YES1;SYK;BAD;STUB1;MAPK3
																											Packaging of telomere ends	1932-06-01	0.523622	0.781187	1.05638	0.683464	H2AFX;HIST1H2AJ;POT1;TERF1;HIST2H2BE;HIST1H2BC
																											Signal transduction through IL-1R	1938-07-01	0.534606	0.795767	1.03364	0.647289	IKBKB;MAP3K1;CHUK;PEBP1;TAB2;ECSIT;MAP3K7
																											Mitochondrial role in apoptotic signaling	2021-04-21	0.535125	0.795767	1.07708	0.673453	CASP3;XIAP;BAX;BAK1
																											Mitochondrial tRNA aminoacylation	2021-04-21	0.535125	0.795767	1.07708	0.673453	RARS2;GARS;IARS2;CARS2
																											Myocyte adrenergic pathway	13/72	0.537156	0.797071	1.00858	0.626796	ASAH1;PLA2G4C;ARRB1;PIK3CB;MAPK10;MAPK9;NRAS;AKT2;GNAQ;GRK6;AKT1;KRAS;HCN2
																											Sphingolipid metabolism	13/72	0.537156	0.797071	1.00858	0.626796	ASAH1;SPHK2;HEXB;SPHK1;HEXA;SUMF2;COL4A3BP;SMPD4;SPTLC1;VAPA;ARSK;KDSR;CSNK1G2
																											Phosphatidylinositol signaling system	14/78	0.544673	0.807356	1.00128	0.608346	PI4K2B;DGKD;ITPR2;PIK3CB;PIK3R1;PIK3C2A;DGKZ;PIKFYVE;IMPA1;PIK3CA;INPP5K;PI4KB;CALM1;PLCD3
																											Glucuronidation	2021-05-27	0.54643	0.808224	1.04034	0.628728	UGDH;UGP2;PGM3;PGM1;HK1
																											Mammalian calpain regulation of cell motility	2021-05-27	0.54643	0.808224	1.04034	0.628728	ITGB1;CAST;PRKAR1A;CAPN1;MAPK3
																											GnRH signaling pathway	18/101	0.552172	0.815842	0.992618	0.589513	MAP3K2;PLA2G12A;CAMK2D;MAP3K1;ITPR2;CDC42;MAPK10;MAPK9;NRAS;GNAQ;KRAS;MAP2K7;CALM1;SOS1;SOS2;MAP3K4;ATF4;MAPK3
																											Gap junction pathway	16/90	0.55827	0.816547	0.989628	0.576866	MAP3K2;TUBAL3;GNAI3;ITPR2;TUBB4B;GJA1;TUBB6;NRAS;GNAQ;CDK1;KRAS;DRD1;SOS1;SOS2;PRKG1;MAPK3
																											Activation of calcium-permeable kainate receptor	2021-02-10	0.558565	0.816547	1.14439	0.666475	DLG1;CALM1
																											Bile acid and bile salt biosynthesis via 24-hydroxycholesterol	2021-02-10	0.558565	0.816547	1.14439	0.666475	AMACR;SLC27A5
																											Bile acids and bile salt biosynthesis	2021-02-10	0.558565	0.816547	1.14439	0.666475	AMACR;SLC27A5
																											Ethanol oxidation	2021-02-10	0.558565	0.816547	1.14439	0.666475	ACSS2;ALDH2
																											Free radical-induced apoptosis	2021-02-10	0.558565	0.816547	1.14439	0.666475	GPX1;GSS
																											Ganglio sphingolipid metabolism	2021-02-10	0.558565	0.816547	1.14439	0.666475	SLC33A1;ST3GAL1
																											IKK complex recruitment by IRAK1	2021-02-10	0.558565	0.816547	1.14439	0.666475	IKBKB;CHUK
																											IKK complex recruitment mediated by RIP1	2021-02-10	0.558565	0.816547	1.14439	0.666475	IKBKB;CHUK
																											Rheb GTPase activity by AMPK regulation	2021-02-10	0.558565	0.816547	1.14439	0.666475	PRKAA1;RHEB
																											FAS pathway and stress induction of heat shock protein regulation	1939-07-01	0.564146	0.821944	1.00127	0.573172	MAP3K1;PRKDC;RIPK2;CASP3;FADD;MAP3K7;PAK2
																											FRS2-mediated cascade	1939-07-01	0.564146	0.821944	1.00127	0.573172	NRAS;CDK1;PTPN11;KRAS;SOS1;FGF2;MAPK3
																											CD40L signaling pathway	2021-03-16	0.567022	0.821944	1.05633	0.599318	IKBKB;MAP3K1;CHUK
																											Inhibition of platelet activation by aspirin	2021-03-16	0.567022	0.821944	1.05633	0.599318	ITGB1;SYK;MAPK3
																											Interleukin-10 anti-inflammatory signaling pathway	2021-03-16	0.567022	0.821944	1.05633	0.599318	STAT1;STAT3;JAK1
																											Other glycan degradation	2021-03-16	0.567022	0.821944	1.05633	0.599318	HEXB;HEXA;MAN2C1
																											Other semaphorin interactions	2021-03-16	0.567022	0.821944	1.05633	0.599318	ITGB1;SEMA5A;PLXNA4
																											Sonic Hedgehog (Shh) pathway	2021-03-16	0.567022	0.821944	1.05633	0.599318	GSK3B;PRKAR1A;DYRK1A
																											Epstein-Barr virus LMP1 signaling	2021-04-22	0.574365	0.830843	1.01718	0.564019	IKBKB;HSP90AA1;CHUK;MAP3K7
																											Glycosaminoglycan biosynthesis: chondroitin sulfate	2021-04-22	0.574365	0.830843	1.01718	0.564019	CHST7;CHPF;B3GAT3;B4GALT7
																											Amyloids	1951-09-01	0.578256	0.835595	0.98079	0.537217	CST3;APP;HIST1H3A;H2AFX;HIST1H2AJ;B2M;HIST2H2BE;ITM2B;HIST1H2BC
																											G-protein beta-gamma signalling	2021-05-28	0.581002	0.836933	0.995046	0.540312	GNG10;AKT2;GNB2;GNB4;AKT1
																											Multi-step regulation of transcription by PITX2	2021-05-28	0.581002	0.836933	0.995046	0.540312	GSK3B;MED1;CREBBP;APC;LRP6
																											PTM: gamma carboxylation, hypusine formation and arylsulfatase activation	2021-05-28	0.581002	0.836933	0.995046	0.540312	ARSK;DHPS;FURIN;DOHH;SUMF2
																											Mitochondrial pathway of apoptosis: BH3-only Bcl-2 family	17/97	0.583002	0.838939	0.972534	0.524746	PRKCI;SPHK2;BAD;HIF1A;PPP1CA;PPP2CA;MAPK10;MAPK9;CAPN7;AKT2;RPS6KB2;CDK1;E2F1;AKT1;CAPN1;CTSF;CTSD
																											Opioid signaling	14/80	0.585744	0.842007	0.970817	0.519263	PDE4D;GNAI3;ITPR2;PPP1CA;PPP2CA;GNG10;CREB1;PPP2R1B;PPP2R1A;PRKAR1A;ADRBK1;GNB2;GNB4;CALM1
																											Nuclear signaling by ErbB4	1940-07-01	0.592797	0.851259	0.970874	0.507673	YAP1;PSENEN;ADAM17;NCOR1;CUL1;PTPN11;TAB2
																											PPAR signaling pathway	1969-12-01	0.59568	0.85451	0.963508	0.499147	RXRB;SCP2;GK;FABP5;SCD;ILK;OLR1;ACADM;ACSL3;ACOX3;SLC27A5;SLC27A4
																											RhoA activity regulation	1946-08-01	0.598137	0.857143	0.963549	0.495203	VAV3;NET1;ARHGEF18;MYO9B;ARAP1;ARHGEF2;ARHGAP5;ECT2
																											Activation of BH3-only proteins	2021-03-17	0.610542	0.861937	0.980822	0.483946	BAD;E2F1;AKT1
																											Beta-arrestin-dependent recruitment of Src kinases in GPCR signaling	2021-03-17	0.610542	0.861937	0.980822	0.483946	ADRBK1;ARRB1;MAPK3
																											Post-chaperonin tubulin folding pathway	2021-03-17	0.610542	0.861937	0.980822	0.483946	TUBB6;TBCB;TUBB4B
																											Deadenylation of mRNA	2021-04-23	0.611655	0.861937	0.96359	0.473689	EIF4A3;PARN;CNOT8;EIF4E
																											Proximal tubule bicarbonate reclamation	2021-04-23	0.611655	0.861937	0.96359	0.473689	CA2;SLC25A10;ATP1B1;GLS
																											Rho cell motility signaling pathway	2021-04-23	0.611655	0.861937	0.96359	0.473689	ROCK1;LIMK1;ARHGAP1;ARHGAP5
																											Attenuation of GPCR signaling	2021-02-11	0.612883	0.861937	1.01718	0.49799	PRKAR1A;ARRB1
																											Bone mineralization regulation	2021-02-11	0.612883	0.861937	1.01718	0.49799	SPP1;ENPP1
																											CD28-dependent Vav1 pathway	2021-02-11	0.612883	0.861937	1.01718	0.49799	CDC42;PAK2
																											Erythropoietin-mediated neuroprotection through NF-kB	2021-02-11	0.612883	0.861937	1.01718	0.49799	CDKN1A;HIF1A
																											Integrin beta-4 pathway	2021-02-11	0.612883	0.861937	1.01718	0.49799	LAMB1;LAMC1
																											Keratan sulfate degradation	2021-02-11	0.612883	0.861937	1.01718	0.49799	HEXB;HEXA
																											Monocyte and its surface molecules	2021-02-11	0.612883	0.861937	1.01718	0.49799	ITGB1;ITGAM
																											Notch receptor processing	2021-02-11	0.612883	0.861937	1.01718	0.49799	PSENEN;ADAM10
																											Recycling of bile acids and salts	2021-02-11	0.612883	0.861937	1.01718	0.49799	SLCO1B3;SLC27A5
																											Regulated proteolysis of p75 neurotrophin receptor	2021-02-11	0.612883	0.861937	1.01718	0.49799	PSENEN;ADAM17
																											Pentose and glucuronate interconversions	2021-05-29	0.614104	0.861937	0.953528	0.464932	UGDH;UGP2;RPEL1;RPE;AKR1B1
																											S1P/S1P3 pathway	2021-05-29	0.614104	0.861937	0.953528	0.464932	GNA13;GNAQ;GNAI3;AKT1;MAPK3
																											Skeletal myogenesis control by HDAC and calcium/calmodulin-dependent kinase (CaMK)	2021-05-29	0.614104	0.861937	0.953528	0.464932	MEF2A;PIK3CA;AKT1;PIK3R1;CALM1
																											Vascular smooth muscle contraction	20/116	0.61471	0.861937	0.953332	0.463896	PPP1R14A;PLA2G12A;PPP1R12A;ROCK1;ROCK2;ARAF;ITPR2;BRAF;MYL6B;PPP1CA;PPP1CB;GNA13;PPP1CC;MYL6;CALD1;GNAQ;MRVI1;CALM1;PRKG1;MAPK3
																											Senescence and autophagy	17/99	0.619057	0.861937	0.948698	0.454955	UVRAG;GSK3B;BECN1;CDKN1A;KMT2A;SERPINE1;HMGA1;BRAF;GABARAP;RSL1D1;ATG16L1;LAMP2;MLST8;E2F1;IL6ST;SLC39A3;ATG5
																											Actions of nitric oxide in the heart	1947-08-01	0.623892	0.861937	0.938785	0.442899	HSP90AA1;PIK3CA;PRKAR1A;GNAQ;AKT1;PIK3R1;CALM1;PRKG1
																											Abacavir metabolism	2021-01-05	0.627715	0.861937	1.14435	0.532889	GUK1
																											Activation of NOXA and translocation to mitochondria	2021-01-05	0.627715	0.861937	1.14435	0.532889	E2F1
																											Beta-oxidation of lauroyl-CoA to decanoyl-CoA	2021-01-05	0.627715	0.861937	1.14435	0.532889	ECHS1
																											CREB phosphorylation through the activation of adenylate cyclase	2021-01-05	0.627715	0.861937	1.14435	0.532889	CREB1
																											Disinhibition of SNARE formation	2021-01-05	0.627715	0.861937	1.14435	0.532889	STXBP3
																											Dopamine receptors	2021-01-05	0.627715	0.861937	1.14435	0.532889	DRD1
																											Extrinsic pathway	2021-01-05	0.627715	0.861937	1.14435	0.532889	TFPI
																											FGFR1b ligand binding and activation	2021-01-05	0.627715	0.861937	1.14435	0.532889	FGF2
																											FOSB gene expression and drug abuse	2021-01-05	0.627715	0.861937	1.14435	0.532889	GRIA2
																											FasL/CD95L signaling	2021-01-05	0.627715	0.861937	1.14435	0.532889	FADD
																											Flap intermediate removal from the telomere lagging strand (C-strand)	2021-01-05	0.627715	0.861937	1.14435	0.532889	FEN1
																											G-protein signaling through tubby proteins	2021-01-05	0.627715	0.861937	1.14435	0.532889	GNAQ
																											Heme degradation	2021-01-05	0.627715	0.861937	1.14435	0.532889	HMOX2
																											Histidine catabolism	2021-01-05	0.627715	0.861937	1.14435	0.532889	HAL
																											Kit receptor transcriptional targets	2021-01-05	0.627715	0.861937	1.14435	0.532889	KIT
																											Maturation of Notch precursor via proteolytic cleavage	2021-01-05	0.627715	0.861937	1.14435	0.532889	FURIN
																											Neuroregulin receptor degredation protein-1 controls ErbB3 receptor recycling	2021-01-05	0.627715	0.861937	1.14435	0.532889	UBE2D1
																											Nifedipine activity	2021-01-05	0.627715	0.861937	1.14435	0.532889	PCNA
																											Phospholipase C delta-1 interactions in phospholipid-associated cell signaling	2021-01-05	0.627715	0.861937	1.14435	0.532889	TGM2
																											Polo-like kinase 3 (PLK3) pathway	2021-01-05	0.627715	0.861937	1.14435	0.532889	PLK3
																											Activation of kainate receptors upon glutamate binding	2021-05-30	0.645617	0.883004	0.915331	0.400502	GNG10;DLG1;GNB2;GNB4;CALM1
																											Gap junction trafficking and regulation	2021-05-30	0.645617	0.883004	0.915331	0.400502	GJA1;CLTC;CLTB;AP2M1;DNM2
																											Ovarian infertility genes	2021-05-30	0.645617	0.883004	0.915331	0.400502	DAZL;NCOR1;CDK4;ATM;SYNE2
																											TRAF6-mediated IRF7 activation	2021-05-30	0.645617	0.883004	0.915331	0.400502	CREBBP;MAVS;SIKE1;TBK1;TANK
																											Urokinase-type plasminogen activator (uPA) and uPAR-mediated signaling	1942-07-01	0.647054	0.884094	0.915284	0.398446	ITGB1;ITGAM;ITGB5;SERPINE1;CRK;DOCK1;BCAR1
																											Chondroitin sulfate/dermatan sulfate metabolism	1948-08-01	0.648728	0.885503	0.91526	0.396072	VCAN;CHST7;CHPF;B3GAT3;HEXB;HEXA;GPC4;B4GALT7
																											Activated AMPK stimulation of fatty-acid oxidation in muscle	2021-03-18	0.651021	0.887756	0.915378	0.392893	PRKAA1;CAB39;STRADA
																											Alanine and aspartate metabolism	2021-02-12	0.661919	0.89818	0.915402	0.377705	DARS;ASL
																											Caspase-mediated cleavage of cytoskeletal proteins	2021-02-12	0.661919	0.89818	0.915402	0.377705	CASP3;PLEC
																											D4-GDI signaling pathway	2021-02-12	0.661919	0.89818	0.915402	0.377705	CASP3;ARHGAP5
																											Gamma-aminobutyric acid receptor life cycle	2021-02-12	0.661919	0.89818	0.915402	0.377705	UBQLN1;GABARAP
																											Reversible hydration of carbon dioxide	2021-02-12	0.661919	0.89818	0.915402	0.377705	CA12;CA2
																											Adrenergic pathway	23/137	0.670841	0.909392	0.922985	0.368476	PRKCI;PDE4D;PLCL1;ITPR2;AKR1B1;BRAF;PIK3CB;PHKA2;MAPK10;MAPK9;NRAS;PDE12;AKT2;GNAQ;GRK6;RGS10;AKT1;PDE5A;KRAS;MAPK6;PLCD3;PDE8A;MAPK3
																											Beta-3 integrin cell surface interactions	1943-07-01	0.672517	0.909633	0.889805	0.35301	SPHK1;SPP1;LAMB1;HMGB1;LAMC1;F11R;PVR
																											Insulin secretion regulation by glucagon-like peptide-1	1943-07-01	0.672517	0.909633	0.889805	0.35301	GNG10;RAP1A;PRKAR1A;GNB2;GNB4;ITPR2;IQGAP1
																											Activation of NMDA receptor upon glutamate binding and postsynaptic events	1937-06-01	0.673311	0.909633	0.885727	0.350348	GRIA2;CAMK2D;CREB1;RPS6KA1;BRAF;CALM1
																											CD40/CD40L signaling	2021-05-31	0.675458	0.909633	0.880072	0.345309	MAPK10;MAPK9;MAP3K1;TDP2;AKT1
																											Ras family activation regulation	2021-05-31	0.675458	0.909633	0.880072	0.345309	NRAS;RASA1;KRAS;SOS1;SOS2
																											Transport of vitamins, nucleosides, and related molecules	2021-05-31	0.675458	0.909633	0.880072	0.345309	SLC35A3;SLCO1B3;SLC33A1;SLC29A1;SLC27A4
																											cAMP cell motility pathway inferred from amoeba model	1967-11-01	0.675633	0.909633	0.898791	0.352421	VASP;PDE12;PDE4D;BRK1;AKT1;ITPR2;PDE5A;PLCD3;PDE8A;ACTB;MAPK3
																											Myc repressed pathway	1973-12-01	0.677176	0.910618	0.900107	0.350884	ITGB1;SMAD2;CDKN1A;SMAD4;CREB1;RBL1;HDAC3;PPP2R4;CSDE1;ID2;ERBB2;BRCA1
																											G alpha s pathway	20/120	0.677685	0.910618	0.914975	0.355992	MAP3K2;PYGB;MAP3K1;PDE4D;BRAF;PHKB;PHKA2;MAPK10;MAPK9;RAP1A;CREB1;PDE12;ADRBK1;GRK6;RGS10;PDE5A;MAPK6;PDE8A;MAP3K4;MAPK3
																											Ghrelin pathway	2021-04-25	0.679858	0.911763	0.871713	0.336369	ABCA1;BAX;PLIN2;ATG5
																											PIP2 hydrolysis	2021-04-25	0.679858	0.911763	0.871713	0.336369	DAGLA;DGKD;ITPR2;DGKZ
																											Inhibition of T cell receptor signaling by activated Csk	2021-03-19	0.688394	0.918374	0.858115	0.320415	CREBBP;PRKAR1A;CSK
																											Lissencephaly gene (LIS1) in neuronal migration and development	2021-03-19	0.688394	0.918374	0.858115	0.320415	CLIP1;DCTN3;PAFAH1B1
																											Ras activation upon calcium influx through NMDA receptor	2021-03-19	0.688394	0.918374	0.858115	0.320415	CAMK2D;CREB1;CALM1
																											Alternative NF-kappaB pathway	2021-01-06	0.694482	0.918374	0.915425	0.333754	CHUK
																											Fas signaling pathway in hepatocytes	2021-01-06	0.694482	0.918374	0.915425	0.333754	YES1
																											G beta-gamma signaling through PI3K gamma	2021-01-06	0.694482	0.918374	0.915425	0.333754	AKT1
																											Influenza factor interactions with host	2021-01-06	0.694482	0.918374	0.915425	0.333754	CPSF4
																											Mitochondrial beta-oxidation of unsaturated fatty acids	2021-01-06	0.694482	0.918374	0.915425	0.333754	ACADM
																											NADE-dependent death signaling	2021-01-06	0.694482	0.918374	0.915425	0.333754	CASP3
																											Neurotransmitter clearance in the synaptic cleft	2021-01-06	0.694482	0.918374	0.915425	0.333754	ALDH2
																											Pregnenolone biosynthesis	2021-01-06	0.694482	0.918374	0.915425	0.333754	AKR1B1
																											RSK activation	2021-01-06	0.694482	0.918374	0.915425	0.333754	RPS6KA1
																											Signaling by EGFR	2021-01-06	0.694482	0.918374	0.915425	0.333754	SOS1
																											Vitamin B6 metabolism	2021-01-06	0.694482	0.918374	0.915425	0.333754	PDXK
																											Thromboxane A2 receptor signaling	1956-09-01	0.694862	0.918374	0.876183	0.318968	GNA13;LYN;YES1;SYK;ROCK1;ADRBK1;GNAQ;AKT1;TGM2
																											Type II interferon signaling (interferon-gamma)	1950-08-01	0.695435	0.918374	0.87157	0.316569	IFNGR1;STAT1;HIST1H4H;PTPN11;HIST1H4I;HIST1H4C;IRF9;JAK1
																											Nuclear beta-catenin signaling and target gene transcription regulation	13/80	0.696935	0.919475	0.887715	0.320521	HDAC2;CHD8;CUL1;YWHAZ;VCAN;XPO1;APC;TBL1XR1;RUVBL2;ID2;HBP1;TCF4;YWHAG
																											EGFR interaction with phospholipase C-gamma	1938-06-01	0.699318	0.920858	0.857996	0.306862	CREB1;PRKAR1A;ADRBK1;ERBB2;ITPR2;CALM1
																											Glycosphingolipid metabolism	1938-06-01	0.699318	0.920858	0.857996	0.306862	ASAH1;SMPD4;HEXB;HEXA;ARSK;SUMF2
																											Hypothetical network for drug addiction	1932-05-01	0.703575	0.925008	0.847425	0.297938	GRIA2;CREB1;KRIT1;DRD1;MAPK3
																											Arylsulfatase activation	2021-02-13	0.705822	0.925008	0.832133	0.289909	ARSK;SUMF2
																											CBL-mediated ligand-induced downregulation of EGF receptors	2021-02-13	0.705822	0.925008	0.832133	0.289909	SH3GLB2;CBL
																											Platelet adhesion to exposed collagen	2021-02-13	0.705822	0.925008	0.832133	0.289909	ITGB1;LYN
																											Signal regulatory protein (SIRP) family interactions	2021-02-13	0.705822	0.925008	0.832133	0.289909	PTPN11;PTK2
																											Acyl chain remodelling of phosphatidylcholine	2021-04-26	0.710642	0.925175	0.832039	0.284213	PLA2G12A;PNPLA8;PLA2G4C;MBOAT2
																											Fibroblast growth factor 1	2021-04-26	0.710642	0.925175	0.832039	0.284213	CDKN1A;SERPINE1;TCF4;TNPO1
																											Interleukin-27-mediated signaling events	2021-04-26	0.710642	0.925175	0.832039	0.284213	STAT1;STAT3;IL6ST;JAK1
																											PGC-1a regulation	2021-04-26	0.710642	0.925175	0.832039	0.284213	MEF2A;CAMK2D;CALM1;CAMKK2
																											Physiological and pathological hypertrophy of the heart	2021-04-26	0.710642	0.925175	0.832039	0.284213	CAMK2D;STAT3;CALM1;IL6ST
																											Segmentation clock	2021-04-26	0.710642	0.925175	0.832039	0.284213	GSK3B;ADAM17;RBPJ;LRP6
																											Tetrasaccharide linker sequence formation in glycosaminoglycan biosynthesis	2021-04-26	0.710642	0.925175	0.832039	0.284213	VCAN;B3GAT3;GPC4;B4GALT7
																											Folate metabolism	1963-10-01	0.714592	0.929441	0.86325	0.29009	ABCA1;MTRR;AHCY;FLAD1;RFK;SERPINE1;CAT;MTR;GART;SLC19A1
																											HNF3B pathway	1945-07-01	0.719879	0.935436	0.84287	0.277028	ACADVL;CREB1;TFRC;FOXF1;UCP2;AKT1;ACADM
																											Chondroitin sulfate biosynthesis	2021-03-20	0.722673	0.936422	0.807588	0.262303	VCAN;CHST7;CHPF
																											GATA3-mediated activation of Th2 cytokine expression	2021-03-20	0.722673	0.936422	0.807588	0.262303	IL5;PRKAR1A;JUNB
																											Gene expression regulation in pancreatic beta cells	2021-03-20	0.722673	0.936422	0.807588	0.262303	AKT2;AKT1;MAFA
																											AP-1 transcription factor network	1970-11-01	0.732275	0.946889	0.852934	0.265773	GJA1;ELF1;CREB1;IL5;DMTF1;CBFB;BAG1;NFATC3;CDK1;JUNB;HIF1A
																											Tryptophan metabolism	1958-09-01	0.735322	0.946889	0.840318	0.258353	ALDH3A2;ECHS1;ALDH2;PRMT1;RNF25;CAT;UBR5;UBE3A;HSD17B10
																											ADP signalling through P2Y purinoceptor 12	2021-04-27	0.7392	0.946889	0.795815	0.240484	GNG10;GNB2;GNAI3;GNB4
																											Glycosphingolipid biosynthesis: lacto and neolacto series	2021-04-27	0.7392	0.946889	0.795815	0.240484	B4GALT2;B4GALT3;B3GNT2;ST3GAL6
																											Proteins and DNA sequences in cardicac structures	2021-04-27	0.7392	0.946889	0.795815	0.240484	NFATC3;ATP2A2;PTPN11;RUNX2
																											TWEAK regulation of gene expression	2021-04-27	0.7392	0.946889	0.795815	0.240484	TNFRSF12A;SERPINE1;SPP1;RUNX2
																											Hyaluronan metabolism	2021-02-14	0.744854	0.946889	0.762742	0.224679	HEXB;HEXA
																											Interleukin-6 regulation of target genes	2021-02-14	0.744854	0.946889	0.762742	0.224679	ABCC4;SLC38A2
																											Platelet amyloid precursor protein pathway	2021-02-14	0.744854	0.946889	0.762742	0.224679	APP;SERPINE1
																											Signaling by NOTCH2	2021-02-14	0.744854	0.946889	0.762742	0.224679	PSENEN;ADAM10
																											G-protein signaling pathways	15/95	0.746463	0.946889	0.857638	0.250781	PRKCI;PDE4D;GNAI3;AKAP12;GNA13;GNG10;NRAS;AKAP11;PRKAR1A;PRKD3;GNAQ;GNB2;KRAS;CALM1;PDE8A
																											Activation of PKC through G-protein coupled receptors	2021-01-07	0.749278	0.946889	0.762808	0.220181	GNAQ
																											Anandamide metabolism	2021-01-07	0.749278	0.946889	0.762808	0.220181	CNR2
																											Cation-coupled chloride cotransporters	2021-01-07	0.749278	0.946889	0.762808	0.220181	SLC12A2
																											Cyanoamino acid metabolism	2021-01-07	0.749278	0.946889	0.762808	0.220181	GGT1
																											FXR and LXR regulation of cholesterol metabolism	2021-01-07	0.749278	0.946889	0.762808	0.220181	ABCA1
																											Gamma-secretase-mediated ErbB4 signaling pathway	2021-01-07	0.749278	0.946889	0.762808	0.220181	ADAM17
																											Gene expression regulation in late stage pancreatic bud precursor cells	2021-01-07	0.749278	0.946889	0.762808	0.220181	RBPJ
																											Inactivation of BCL-2 by BH3-only proteins	2021-01-07	0.749278	0.946889	0.762808	0.220181	BAD
																											Neurofascin interactions	2021-01-07	0.749278	0.946889	0.762808	0.220181	SDCBP
																											NrCAM interactions	2021-01-07	0.749278	0.946889	0.762808	0.220181	DLG1
																											Phase I of biological oxidations: non-cytochrome P450 enzymes	2021-01-07	0.749278	0.946889	0.762808	0.220181	ESD
																											Spermatogenesis regulation by CREM	2021-01-07	0.749278	0.946889	0.762808	0.220181	XPO1
																											Telomerase RNA component gene hTERC transcriptional regulation	2021-01-07	0.749278	0.946889	0.762808	0.220181	SP3
																											Transport of nucleosides and free purine and pyrimidine bases across the plasma membrane	2021-01-07	0.749278	0.946889	0.762808	0.220181	SLC29A1
																											Ubiquinone and other terpenoid-quinone biosynthesis	2021-01-07	0.749278	0.946889	0.762808	0.220181	COQ6
																											Wnt/LRP6 signaling	2021-01-07	0.749278	0.946889	0.762808	0.220181	LRP6
																											ChREBP regulation by carbohydrates and cAMP	2021-03-21	0.753931	0.949236	0.762676	0.215421	PPP2CA;PRKAA1;PRKAR1A
																											Presynaptic function of kainate receptors	2021-03-21	0.753931	0.949236	0.762676	0.215421	GNG10;GNB2;GNB4
																											S1P/S1P1 pathway	2021-03-21	0.753931	0.949236	0.762676	0.215421	SPHK1;GNAI3;MAPK3
																											T cell activation co-stimulatory signal	2021-03-21	0.753931	0.949236	0.762676	0.215421	PIK3CA;PTPN11;PIK3R1
																											EGF receptor transactivation by GPCRs in cardiac hypertrophy	1934-05-01	0.754574	0.949236	0.788886	0.222152	IKBKB;CHUK;RPS6KA1;SOS1;MAPK3
																											G-protein activation	2021-04-28	0.765567	0.962188	0.762609	0.203723	GNG10;GNB2;GNAI3;GNB4
																											Endochondral ossification	1966-10-01	0.76872	0.965272	0.816854	0.214856	CAB39;STAT1;SPP1;AKT1;ENPP1;CALM1;FGF2;SLC38A2;RUNX2;BMPR1A
																											Prion diseases	1935-05-01	0.777479	0.974189	0.762543	0.191931	PRNP;HSPA5;BAX;LAMC1;MAPK3
																											Arf6 vesicle-mediated transport	2021-02-15	0.779351	0.974189	0.704026	0.175509	TIAM1;MAPK3
																											Extrinsic prothrombin activation pathway	2021-02-15	0.779351	0.974189	0.704026	0.175509	ZFHX3;TFPI
																											Mu-calpain pathway	2021-02-15	0.779351	0.974189	0.704026	0.175509	ITGB1;CAPN1
																											Prolactin receptor signaling pathway	2021-02-15	0.779351	0.974189	0.704026	0.175509	CUL1;PTPN11
																											Ion channel transport	1961-09-01	0.788899	0.975144	0.791693	0.187724	ATP8B1;ATP2B4;ATP2A2;ATP11C;ATP11B;ATP11A;ATP2B1;ATP1B1;ATP2C1
																											Aldosterone-regulated sodium reabsorption	1942-06-01	0.789006	0.975144	0.762477	0.180692	PIK3CA;KRAS;PIK3CB;PIK3R1;ATP1B1;MAPK3
																											Histidine metabolism	2021-04-29	0.789801	0.975144	0.73206	0.172747	ALDH3A2;HAL;ALDH2;WBSCR22
																											Statin pathway	2021-04-29	0.789801	0.975144	0.73206	0.172747	ABCA1;SOAT1;HMGCR;FDFT1
																											T cell receptor calcium pathway	2021-04-29	0.789801	0.975144	0.73206	0.172747	BATF3;RCAN2;NFATC3;JUNB
																											ChREBP activates metabolic gene expression	2021-01-08	0.794248	0.975144	0.653796	0.150608	MLX
																											Cross-presentation of particulate exogenous antigens (phagosomes)	2021-01-08	0.794248	0.975144	0.653796	0.150608	ITGB5
																											Cytoskeletal remodeling regulation and cell spreading by IPP complex components	2021-01-08	0.794248	0.975144	0.653796	0.150608	LIMS1
																											Dissolution of fibrin clot	2021-01-08	0.794248	0.975144	0.653796	0.150608	SERPINE1
																											Eosinophils in the chemokine network of allergy	2021-01-08	0.794248	0.975144	0.653796	0.150608	IL5
																											Formyl peptide interaction with formyl peptide receptors	2021-01-08	0.794248	0.975144	0.653796	0.150608	APP
																											Insulin secretion regulation by fatty acids bound to GPR40 (FFAR1)	2021-01-08	0.794248	0.975144	0.653796	0.150608	GNAQ
																											Organic cation transport	2021-01-08	0.794248	0.975144	0.653796	0.150608	SLC22A18
																											Oxygen/carbon dioxide exchange in erythrocytes	2021-01-08	0.794248	0.975144	0.653796	0.150608	CA2
																											Proepithelin conversion to epithelin and wound repair control	2021-01-08	0.794248	0.975144	0.653796	0.150608	GRN
																											SREBP control of lipid biosynthesis	2021-01-08	0.794248	0.975144	0.653796	0.150608	SCAP
																											Stabilization of mRNA by HuR	2021-01-08	0.794248	0.975144	0.653796	0.150608	XPO1
																											TSP1-induced apoptosis in microvascular endothelial cell	2021-01-08	0.794248	0.975144	0.653796	0.150608	CASP3
																											Transport of nucleotide sugars	2021-01-08	0.794248	0.975144	0.653796	0.150608	SLC35A3
																											Vitamin C (ascorbate) metabolism	2021-01-08	0.794248	0.975144	0.653796	0.150608	GSTO1
																											Amino acid and oligopeptide SLC transporters	1949-07-01	0.799944	0.981114	0.76241	0.17018	SLC7A6;SLC7A8;SLC25A10;SLC3A2;SLC7A11;SLC38A2;SLC7A2
																											CD8/T cell receptor downstream pathway	1968-10-01	0.800532	0.981114	0.788591	0.175444	IFNAR2;MAPK9;NRAS;NFATC3;BRAF;KRAS;B2M;JUNB;IFNAR1;MAPK3
																											PI3K class IB pathway in neutrophils	1943-06-01	0.807896	0.98707	0.741824	0.158247	NRAS;PRKCI;AKT2;AKT1;KRAS;DOCK2
																											Porphyrin and chlorophyll metabolism	1943-06-01	0.807896	0.98707	0.741824	0.158247	UROD;UROS;HMBS;EPRS;COX10;HMOX2
																											Antigen processing and presentation	1981-12-01	0.808038	0.98707	0.795358	0.169527	PDIA3;PSMB6;HSP90AA1;CREB1;HSPA5;HSPA4;CANX;RFX5;RFXAP;PSME1;RFXANK;B2M
																											Acyl chain remodelling of phosphatidylinositol	2021-02-16	0.809684	0.98707	0.653699	0.138004	PLA2G12A;PLA2G4C
																											Glutamate neurotransmitter release cycle	2021-02-16	0.809684	0.98707	0.653699	0.138004	SLC38A2;GLS
																											Glyoxylate and dicarboxylate metabolism	2021-02-16	0.809684	0.98707	0.653699	0.138004	MTHFD1L;PGP
																											Heparan sulfate/heparin glycosaminoglycan (HS-GAG) biosynthesis	2021-04-30	0.811983	0.988128	0.703861	0.146597	NDST1;HS3ST3A1;GPC4;HS2ST1
																											Tight junction interactions	2021-04-30	0.811983	0.988128	0.703861	0.146597	PRKCI;F11R;MPP5;INADL
																											O-linked glycosylation of mucins	1963-09-01	0.819915	0.996901	0.762278	0.151354	GALNT7;GALNT11;C1GALT1C1;ST6GAL1;GALNT13;GALNT1;C1GALT1;B3GNT2;ST3GAL1
																											G-protein-mediated events	1944-06-01	0.825438	0.998275	0.722258	0.138559	CREB1;PRKAR1A;ADRBK1;GNAI3;ITPR2;CALM1
																											G alpha q pathway	1970-10-01	0.82899	0.998275	0.762211	0.142951	IKBKB;PRKCI;AKT2;GNAQ;GRK6;RGS10;AKT1;ITPR2;PIK3CB;PHKA2
																											Activation of pro-caspase 8	2021-01-09	0.831154	0.998275	0.572036	0.105793	FADD
																											Axonogenesis regulation by p75 neurotrophin receptor	2021-01-09	0.831154	0.998275	0.572036	0.105793	RTN4
																											Benzo(a)pyrene metabolism	2021-01-09	0.831154	0.998275	0.572036	0.105793	AKR1A1
																											Bicarbonate transporters	2021-01-09	0.831154	0.998275	0.572036	0.105793	SLC4A2
																											Elevation of cytosolic calcium levels	2021-01-09	0.831154	0.998275	0.572036	0.105793	ITPR2
																											Endosomal/vacuolar pathway	2021-01-09	0.831154	0.998275	0.572036	0.105793	B2M
																											Inhibition of matrix metalloproteinases	2021-01-09	0.831154	0.998275	0.572036	0.105793	RECK
																											MAP kinase pathway regulation through dual specificity phosphatases	2021-01-09	0.831154	0.998275	0.572036	0.105793	MAPK3
																											Rapid glucocorticoid receptor pathway	2021-01-09	0.831154	0.998275	0.572036	0.105793	MAPK9
																											Sodium/proton exchangers	2021-01-09	0.831154	0.998275	0.572036	0.105793	SLC9A6
																											Nuclear receptor transcription pathway	1951-07-01	0.832822	0.998275	0.727666	0.133116	RXRB;MED1;NR1H2;NR1D2;NR2C2;NR2C1;NR2C2AP
																											Response to elevated platelet cytosolic calcium	1983-12-01	0.833699	0.998275	0.772859	0.14057	APP;ABCC4;WDR1;STXBP3;HSPA5;SERPINE1;LAMP2;CALU;F13A1;FLNA;CD9;CALM1
																											Acyl chain remodelling of phosphatidylglycerol	2021-02-17	0.836236	0.998275	0.610082	0.10911	PLA2G12A;LPGAT1
																											Glycosylphosphatidylinositol (GPI) biosynthesis	2021-02-17	0.836236	0.998275	0.610082	0.10911	PIGN;PIGA
																											Inflammasomes	2021-02-17	0.836236	0.998275	0.610082	0.10911	PYCARD;APP
																											Integrin beta-5 pathway	2021-02-17	0.836236	0.998275	0.610082	0.10911	ITGB5;TGFBR1
																											Ion channel function in vascular endothelium	2021-02-17	0.836236	0.998275	0.610082	0.10911	HSP90AA1;AKT1
																											Syndecan 3 pathway	2021-02-17	0.836236	0.998275	0.610082	0.10911	PSENEN;CASK
																											Unblocking of NMDA receptor, glutamate binding and activation	2021-02-17	0.836236	0.998275	0.610082	0.10911	GRIA2;CAMK2D
																											Arachidonic acid metabolism	1958-08-01	0.840163	0.999996	0.731761	0.127443	PLA2G12A;GPX1;GPX4;PTGES2;LTA4H;GGT1;PTGES;CBR3
																											Wnt interactions in lipid metabolism and immune response	1945-06-01	0.841677	0.999996	0.703696	0.121288	GJA1;UBE2I;KLF5;GPNMB;RBP1;TCF4
																											Heparan sulfate/heparin glycosaminoglycan (HS-GAG) metabolism	1952-07-01	0.847576	0.999996	0.711453	0.117656	NDST1;VCAN;HS3ST3A1;B3GAT3;GPC4;B4GALT7;HS2ST1
																											Glycine, serine and threonine metabolism	1932-04-01	0.850585	0.999996	0.653506	0.105757	GAMT;GATM;PHGDH;DLD
																											Pancreatic beta-cell development regulation	1932-04-01	0.850585	0.999996	0.653506	0.105757	AKT2;AKT1;RBPJ;MAFA
																											Glycosaminoglycan metabolism	16/110	0.854685	0.999996	0.778116	0.122181	B4GALT2;B4GALT3;HS3ST3A1;CHST7;CHPF;B3GAT3;HEXB;HEXA;HS2ST1;NDST1;VCAN;B3GNT2;ST3GAL6;GPC4;ST3GAL1;B4GALT7
																											Downregulation of MTA-3 in ER-negative breast tumors	2021-02-18	0.859388	0.999996	0.571917	0.0866656	MBD3;CTSD
																											PKA activation in glucagon signaling	2021-02-18	0.859388	0.999996	0.571917	0.0866656	CREB1;PRKAR1A
																											Pertussis toxin-insensitive CCR5 signaling in macrophage	2021-02-18	0.859388	0.999996	0.571917	0.0866656	GNAQ;CALM1
																											Abacavir transport and metabolism	2021-01-10	0.861441	0.999996	0.508446	0.0758339	GUK1
																											Dermatan sulfate biosynthesis	2021-01-10	0.861441	0.999996	0.508446	0.0758339	VCAN
																											Insulin secretion regulation by acetylcholine	2021-01-10	0.861441	0.999996	0.508446	0.0758339	GNAQ
																											NODAL signaling regulation	2021-01-10	0.861441	0.999996	0.508446	0.0758339	TDGF1
																											Second messenger role in netrin-1 signaling	2021-01-10	0.861441	0.999996	0.508446	0.0758339	DCC
																											Signal-dependent regulation of myogenesis by corepressor MITR	2021-01-10	0.861441	0.999996	0.508446	0.0758339	MEF2A
																											TRAF6-mediated IRF7 activation in TLR7/8 or 9 signaling	2021-01-10	0.861441	0.999996	0.508446	0.0758339	IRAK4
																											Taurine and hypotaurine metabolism	2021-01-10	0.861441	0.999996	0.508446	0.0758339	GGT1
																											Glucagon signaling in metabolic regulation	1933-04-01	0.867225	0.999996	0.630932	0.0898807	GNG10;PRKAR1A;GNB2;GNB4
																											Glucagon-type ligand receptors	1933-04-01	0.867225	0.999996	0.630932	0.0898807	GHRHR;GNG10;GNB2;GNB4
																											Ascorbate and aldarate metabolism	2021-03-26	0.869846	0.999996	0.596695	0.0832023	ALDH3A2;UGDH;ALDH2
																											Integrin family cell surface interactions	2021-03-26	0.869846	0.999996	0.596695	0.0832023	ITGB1;ITGAM;ITGB5
																											Interleukin-9 regulation of target genes	2021-03-26	0.869846	0.999996	0.596695	0.0832023	CISH;SCGB3A2;JUNB
																											ABC transporters	1947-06-01	0.870472	0.999996	0.669287	0.0928432	ABCA1;ABCC4;ABCD3;ABCB10;ABCB7;ABCB8
																											Natural killer cell-mediated cytotoxicity	20/137	0.872858	0.999996	0.781215	0.106231	IFNAR2;VAV3;NFAT5;SYK;IFNGR1;ARAF;NFATC3;BRAF;PTPN11;PIK3R1;PIK3CB;NRAS;PIK3CA;CASP3;KRAS;SOS1;SOS2;IFNAR1;MAPK3;MICB
																											Alpha-linolenic acid metabolism	2021-02-19	0.879504	0.999996	0.538242	0.0691085	PLA2G12A;ACOX3
																											Glycosaminoglycan degradation	2021-02-19	0.879504	0.999996	0.538242	0.0691085	HEXB;HEXA
																											Tob role in T-cell activation	2021-02-19	0.879504	0.999996	0.538242	0.0691085	SMAD4;TGFBR1
																											Induction of apoptosis through DR3 and DR4/5 death receptors	1934-04-01	0.882245	0.999996	0.609864	0.0764071	CHUK;CASP3;XIAP;FADD
																											B lymphocyte cell surface molecules	2021-01-11	0.886297	0.999996	0.457573	0.0552306	CR2
																											BTG family proteins and cell cycle regulation	2021-01-11	0.886297	0.999996	0.457573	0.0552306	PRMT1
																											Cardiac protection against reactive oxygen species	2021-01-11	0.886297	0.999996	0.457573	0.0552306	GPX1
																											Cystic fibrosis transmembrane conductance regulator (CFTR) and beta 2 adrenergic receptor (b2AR) pathway	2021-01-11	0.886297	0.999996	0.457573	0.0552306	PRKAR1A
																											Down syndrome cell adhesion molecule (DSCAM) interactions	2021-01-11	0.886297	0.999996	0.457573	0.0552306	DCC
																											Gamma-carboxylation, transport, and amino-terminal cleavage of proteins	2021-01-11	0.886297	0.999996	0.457573	0.0552306	FURIN
																											Reversal of insulin resistance by leptin	2021-01-11	0.886297	0.999996	0.457573	0.0552306	PRKAA1
																											Serotonin transporter activity	2021-01-11	0.886297	0.999996	0.457573	0.0552306	SCAMP2
																											Signaling by activated point mutants of FGFR1	2021-01-11	0.886297	0.999996	0.457573	0.0552306	FGF2
																											Telomerase protein component gene hTERT transcriptional regulation	2021-01-11	0.886297	0.999996	0.457573	0.0552306	SP3
																											Transport of organic anions	2021-01-11	0.886297	0.999996	0.457573	0.0552306	SLCO1B3
																											Tryptophan catabolism	2021-01-11	0.886297	0.999996	0.457573	0.0552306	CCBL1
																											Muscle contraction	1949-06-01	0.894756	0.999996	0.63808	0.070957	MYL6;ITGB5;CALD1;TPM2;MYL6B;CALM1
[truncated: 183 more rows]
