# Supplementary material for: Effects of Anticancer Agent P-bi-TAT on Gene Expression Link the Integrin Thyroid Hormone Receptor to Expression of Stemness and Energy Metabolism Genes in Cancer Cells
Source: Preprints.org preprint supplement (doi:10.20944/preprints202203.0125.v1), 2022-03-09
Supplement: Supplementary file 2 [file Supplemental Table S1. GBM PancCa common pathways.xlsx]

## Sheet: 16common
Pathway	Cell line	Up-regulated	Down-regulated	Total genes	p-value	Cell line	Up-regulated	Down-regulated	Total genes	p-value
VEGFA-VEGFR2 Signaling Pathway	GBM	51	-34	85	0.011056	SUIT2-luc	14	-15	29	0.002447
Androgen receptor signaling pathway	GBM	28	-15	43	4.6e-05	SUIT2-luc	9	-4	13	0.008432
Brain-Derived Neurotrophic Factor (BDNF) signaling pathway	GBM	36	-18	54	0.020347	SUIT2-luc	9	-10	19	0.006784
Deubiquitination	GBM	12	-1	13	0	SUIT2-luc	4	0	4	0
Endoderm Differentiation	GBM	41	-12	53	0.025638	SUIT2-luc	11	-6	17	0.028083
Focal Adhesion	GBM	37	-32	69	0.011855	SUIT2-luc	15	-9	24	0.003079
Gastric Cancer Network 2	GBM	11	-4	15	0.027934	SUIT2-luc	7	0	7	0.004667
Human Thyroid Stimulating Hormone (TSH) signaling pathway	GBM	17	-13	30	0.002383	SUIT2-luc	6	-4	10	0.012345
IL-6 signaling pathway	GBM	16	-6	22	0.001737	SUIT2-luc	7	-2	9	0.001931
Integrin-mediated Cell Adhesion	GBM	20	-20	40	0.013987	SUIT2-luc	9	-5	14	0.008498
Interleukin-11 Signaling Pathway	GBM	17	-10	27	4e-06	SUIT2-luc	4	-4	8	0.008305
MAPK Signaling Pathway	GBM	8	-8	16	0.002772	SUIT2-luc	13	-8	21	0.007676
Olfactory receptor activity	GBM	5	-42	47	0	SUIT2-luc	1	-5	6	4e-06
Signaling of Hepatocyte Growth Factor Receptor	GBM	11	-5	16	0.020177	SUIT2-luc	3	-3	6	0.02432
TCF dependent signaling in response to WNT	GBM	11	-3	14	0	SUIT2-luc	4	-5	9	0.005386
TGF-beta Signaling Pathway	GBM	48	-13	61	1.9e-05	SUIT2-luc	12	-5	17	0.013877

## Sheet: SUIT2
SUIT2-luc cell line: 39 affected pathways (at least 4 affected genes)										top 39 signaling pathways
Pathway	Up-regulated genes	Down-regulated genes	Total affected genes	p-value	Up List	Down List				at least 4 genes affected
VEGFA-VEGFR2 Signaling Pathway	14	-15	29	0.002447	ROCK2,FRS2,ITGAV,PTK2,ROCK1,NRP1,PIK3R1,EIF2AK3,DNAJB9,PIK3CA,CTNND1,EEA1,ANXA1,MEF2C	NCF2,BIN1,HSPA1A,SRC,MYL9,RHOC,PTK2B,VAV2,FLNB,TXNIP,ACP1,JUN,NFATC2,EGR1,TEAD4				range 4 to 29 gemes
Focal Adhesion	15	-9	24	0.003079	THBS3,PIK3R1,BRAF,ITGB8,ROCK1,PPP1R12A,PTK2,ITGAV,SOS1,ARHGAP5,PIK3CA,BIRC3,MAPK6,ROCK2,MAP2K5	ILK,ZYX,JUN,ACTB,COL1A2,LAMB3,BAD,MAPK7,SRC
MAPK Signaling Pathway	13	-8	21	0.007676	TGFBR1,MAP4K3,PPM1B,MAP2K5,MAPK6,MAP3K13,SOS2,KRAS,BRAF,CASP1,MEF2C,TAOK1,MAP3K7	MAPK7,DUSP1,DUSP5,DUSP4,PPP3CC,HSPA1A,JUN,NR4A1				p < 0.05
Brain-Derived Neurotrophic Factor (BDNF) signaling pathway	9	-10	19	0.006784	TIAM1,FRS2,NFATC4,PIK3R1,APC,PIK3CA,MAP2K5,MEF2C,EIF2S2	KSR1,BAD,MAPK7,PTK2B,VAV2,NCF2,SRC,JUN,RPS6KA1,EGR1				SUIT2 metastatic pancreatic canecr cells
Insulin Signaling	12	-7	19	0.016971	KIF5B,PIK3R1,SOS1,MAP4K3,MAP3K7,MAPK6,SOS2,MAP3K13,MAP2K5,PIK3C2A,PIK3CA,MAP4K5	SLC2A1,RPS6KA1,MAPK7,RPS6KA2,JUN,FLOT2,EGR1
EGF/EGFR Signaling Pathway	10	-9	19	0.016971	PIK3R1,SOS1,ROCK1,SOS2,KRAS,BRAF,MAP2K5,ATF1,PTK2,MEF2C	JUN,SRC,PLD2,VAV2,PIAS3,PTK2B,MAPK7,RPS6KA1,RPS6KA2
Integrated Breast Cancer Pathway	15	-3	18	0.044118	HIPK2,ATR,BRCA1,SIRT1,ATF1,BLM,MSH2,KRAS,BRAF,SMAD6,IMPA1,TFPI,NCOA2,ANXA1,AHR	BAD,RAD51,JUN
DNA IR-damage and cellular response via ATR	13	-4	17	0.000114	ATR,RBBP8,MSH2,USP1,CLSPN,BLM,NBN,RAD17,BRCA1,TOPBP1,BRIP1,BRCC3,RECQL	RPA2,RAD51,TRIM28,CDC25C
Angiopoietin Like Protein 8 Regulatory Pathway	13	-4	17	0.013197	PIK3R1,SOS1,SOS2,PIK3C2A,PIK3CA,THRB,SCD,MAP3K7,MAP4K3,MAP4K5,MAPK6,MAP2K5,MAP3K13	FLOT2,RPS6KA1,RPS6KA2,MAPK7
TGF-beta Signaling Pathway	12	-5	17	0.013877	ZFYVE16,MAP3K7,UCHL5,PIK3R1,SOS1,TGFBR1,WWP1,RBL1,SKIL,MEF2C,ROCK1,PTK2	TRAP1,COL1A2,JUNB,JUN,SRC
Endoderm Differentiation	11	-6	17	0.028083	LRPPRC,LEO1,CEBPZ,WDHD1,EXT1,CTR9,AEBP2,CDC73,PARP8,TRIM5,APC	WWC1,DUSP5,MAD2L2,DUSP4,TCF4,RAB38
Wnt Signaling Pathway and Pluripotency	8	-7	15	0.003903	FZD8,APC,MAP3K7,MMP7,FZD6,PPP2R5E,CTNND1,LRP6	JUN,CSNK1E,WNT7B,WNT2B,CTBP1,DVL1,PPP2R2B
DNA Damage Response (only ATM dependent)	10	-5	15	0.004739	APC,SOS1,SOS2,SCP2,MAP3K7,PPP2R5E,PIK3CA,PIK3R1,PIK3C2A,KRAS	WNT7B,DVL1,JUN,WNT2B,BAD
ESC Pluripotency Pathways	10	-5	15	0.013871	FZD6,BRAF,FZD8,SOS1,IL6ST,MAP2K5,MAPK6,APC,SMAD6,LRP6	DVL1,JUN,MAPK7,WNT7B,WNT2B
Integrin-mediated Cell Adhesion	9	-5	14	0.008498	BRAF,ROCK2,ROCK1,SOS1,PTK2,MAP2K5,MAPK6,ITGAV,ITGB8	MAPK7,VAV2,ZYX,SRC,ILK
Androgen receptor signaling pathway	9	-4	13	0.008432	PTK2,ROCK1,ROCK2,RB1,SIRT1,RNF6,PIK3R1,BRCA1,NCOA2	PIAS3,SRC,JUN,KAT5
Corticotropin-releasing hormone signaling pathway	5	-7	12	0.035796	PTK2,TLR4,NCOA2,CRHBP,BRAF	JUN,JUNB,NR4A1,TRIM28,IL18,TCF4,IL2
Oncostatin M Signaling Pathway	5	-6	11	0.0043	KRAS,IL6ST,HIF1A,SOS1,PIK3R1	PIAS3,SRC,PTK2B,JUNB,CYR61,EGR1
Prolactin Signaling Pathway	6	-5	11	0.018313	PIK3CA,IRF1,PIK3R1,PTK2,YWHAG,SOS1	RPS6KA2,PIAS3,JUN,VAV2,SRC
Apoptosis & Apoptotic Signaling Pathway	7	-4	11	0.048141	IRF1,CASP1,BIRC3,PIK3R1,IRF4,TNFSF10,HELLS	BAD,BIRC5,JUN,DFFB
DNA IR-Double Strand Breaks (DSBs) and cellular response via ATM	6	-4	10	0.004955	ATR,BLM,NBN,RAD17,BRCA1,RIF1	RAD51,KAT5,TRIM28,CDC25C
Wnt Signaling Pathway	5	-5	10	0.012345	FZD8,FZD6,PPP2R5E,APC,LRP6	WNT2B,WNT7B,DVL1,CSNK1E,JUN
Human Thyroid Stimulating Hormone (TSH) signaling pathway	6	-4	10	0.012345	BRAF,PIK3CA,PIK3R1,RB1,PDE4D,GNA13	JUN,EGR1,SRC,RPS6KA1
DNA Damage Response	6	-4	10	0.023782	RB1,ATR,CCNE2,RAD17,NBN,BRCA1	SFN,RPA2,CDC25C,RAD51
Glucocorticoid Receptor Pathway	5	-5	10	0.027053	ARL5B,KTN1,BIRC3,SCNN1A,TNS4	JUN,FGFBP1,RGS2,LRRC8A,ETNK2
IL-6 signaling pathway	7	-2	9	0.001931	SOS1,PIK3R1,IL6R,IL6ST,PRDM1,MAP3K7,IRF1	BAD,JUNB
TCF dependent signaling in response to WNT	4	-5	9	0.005386	LEO1,CDC73,APC,USP34	CTBP1,KAT5,CSNK1E,DVL1,CCDC88C
Hepatitis C and Hepatocellular Carcinoma	6	-3	9	0.01327	IL6R,HIF1A,BRCA1,BIRC3,SOS1,TGFBR1	BIRC5,VAV2,JUN
Interleukin-11 Signaling Pathway	4	-4	8	0.008305	IL6ST,YES1,PIK3R1,ATF1	RPS6KA1,BIRC5,SRC,PIAS3
Wnt Signaling Pathway Netpath	3	-5	8	0.019736	LRP6,APC,MAP3K7	DVL1,CTBP1,TCF4,CSNK1E,NFATC2
Apoptosis-related network due to altered Notch3 in ovarian cancer	5	-3	8	0.024427	CUL5,RIPK2,HELLS,BCL3,PTK2	BIRC5,NRG1,PTK2B
Gastric Cancer Network 2	7	0	7	0.004667	MTDH,PLAC8,RAD17,RFC3,FAM91A1,ATAD2,CEBPZ
Wnt Signaling in Kidney Disease	4	-3	7	0.009156	NPHP3,LRP6,FZD8,FZD6	WNT2B,WNT7B,DVL1
Olfactory receptor activity	1	-5	6	4e-06	OR2AK2	OR8H1,OR56B1,OR52I2,OR52N2,OR2M3
Signaling of Hepatocyte Growth Factor Receptor	3	-3	6	0.02432	PIK3CA,PTK2,SOS1	PTK2B,JUN,SRC
Interactome of polycomb repressive complex 2 (PRC2)	5	0	5	0.003196	BCLAF1,SETX,MORC3,AEBP2,SUZ12
Signaling by FGFR2	4	-1	5	0.025711	FRS2,PIK3R1,PIK3CA,BRAF	ESRP2
Deubiquitination	4	0	4	0	UCHL5,USP34,PSMD14,VCPIP1
Benzo(a)pyrene metabolism	4	0	4	0.001954	AKR1C1,AKR1C2,AKR1C3,AKR1C4

## Sheet: GBM
GBM 021913: 103 affected pathways (at least 10 affected genes)
Pathway	UP	DOWN	#Total	p-value	Up List	Down List
miR-targeted genes in lymphocytes - TarBase	131	-49	180	0.000205	CHORDC1,FMNL2,EGFR,GPAM,IFRD1,BCKDHB,PDLIM5,SUCLG2,MTRR,ELOVL5,TNFRSF10A,SLC38A1,RCN2,RAI14,RTN4,RAB6A,MBNL1,PDCD4,CYP51A1,ATP2A2,RB1,BACH1,DHX40,TMED2,GPD2,KRAS,MET,CACNA2D1,DMTF1,STRN,WDFY1,SLC25A24,SLC38A2,SEC24A,ATP6V1C1,GFM1,FNDC3B,NRP1,MLLT11,CDK6,SLC12A2,KDELC2,FRG1,TXNRD1,CBFB,CUL4B,GALNT7,SHOC2,BET1,NRAS,MYO10,WNT5A,SLC25A13,RARS,FGF2,AMIGO2,CALCOCO2,NT5E,ATRX,GOLGA7,GFPT1,SYPL1,NARS,TIC…	PHC2,CAPG,CDK5RAP3,POLR2C,UBE2S,TMED3,PPP5C,IPO4,RHOG,EHMT2,E2F1,PPP2R4,RAB34,TPM2,DDX5,MTX1,ARL2,POLD2,DNAJB1,MYCN,TXN2,AURKB,ABHD11,CDKN1C,PGM1,MRPS33,MPDU1,ATAD3B,POLE4,AP2A1,KIT,HMGA1,RHOB,GYS1,TRMT1,RHEB,LMNB2,ATP6V1F,CARHSP1,SLC25A1,GSTM4,YIF1B,TNFAIP2,ARFIP2,MAPK7,NF2,LRRC8A,UNC93B1,PTBP1
miR-targeted genes in muscle cell - TarBase	118	-32	150	0.000529	ANAPC1,CALCOCO2,DOCK5,FAM96A,FNDC3A,GRPEL2,IFRD1,MTRR,PGRMC1,SLC25A13,SLC25A24,SLC25A32,SPCS3,THBS1,SLC38A1,SYPL1,AMIGO2,ATP6V1C1,BET1,CBFB,CLDN1,CUL4B,CYP51A1,DHX40,DSG2,FMNL2,GNA13,HSD17B12,MET,MYO10,NT5E,PDLIM5,PICALM,PKN2,PRKCI,RAB27B,RAB6A,RAI14,RCN2,SCAMP1,SDCBP,SYNE2,TRAM1,TXNRD1,WDFY1,ABHD10,CA12,CACNA2D1,CHORDC1,EGFR,EIF4E,FGF2,FNDC3B,GALNT7,GFM1,GFPT1,GPAM,IGF2R,ITGA2,KPNA3,LAMC1,PANX1,…	ATAD3B,CAPG,CARHSP1,HMGA1,IPO4,POLD2,POLR2C,RHOG,TPM2,CDK5RAP3,DNAJB1,POLE4,RAB34,RHEB,ARL2,GSTM4,TXN2,EHMT2,LRRC8A,SLC25A1,LMNB2,PGM1,PPP2R4,TMED3,TNFAIP2,NF2,ERBB2,SRF,MAPK7,E2F1,GRIA2,KIT
miR-targeted genes in epithelium - TarBase	87	-36	123	0.004889	CALCOCO2,DOCK5,FAM96A,FNDC3A,GRPEL2,IFRD1,MTRR,PGRMC1,SLC25A24,SLC38A1,SYPL1,AMIGO2,CLDN1,CUL4B,CYP51A1,DHX40,GNA13,HSD17B12,MET,MYO10,NARS,NT5E,PDLIM5,PICALM,PRKCI,RAB6A,RAI14,RCN2,SDCBP,SYNE2,TRAM1,WDFY1,CA12,EGFR,FNDC3B,GALNT7,GFM1,GFPT1,IGF2R,LAMC1,PHLDB2,PURA,RARS,RTN4,SERPINE2,SLC12A2,SPTLC1,UBE4A,VTI1B,ARCN1,ARF4,BCKDHB,CAND1,GOLGA7,NRP1,SNX6,ATP2A2,ATRX,CHD1,CPNE8,DOCK7,GALNT1,IDH1,KDELC2…	ATAD3B,AURKB,CAPG,IPO4,MRPS33,POLD2,POLR2C,RHOB,SLC25A1,TRMT1,ARFIP2,CDK5RAP3,DNAJB1,PHC2,PPP5C,RAB34,RHEB,GSTM4,TXN2,UBE2S,YIF1B,DDX5,EHMT2,MTX1,PTBP1,UNC93B1,LMNB2,MPDU1,PGM1,PPP2R4,TMED3,TNFAIP2,KCNJ2,E2F1,KIT,CDKN1C
VEGFA-VEGFR2 Signaling Pathway	51	-34	85	0.011056	STAT3,ROCK2,MAPK9,SMARCA2,NCK1,PAK2,STAT1,FRS2,CRK,PRKCI,RAP1A,ITGAV,PTK2,IQGAP1,ITGB1,CAPN2,ROCK1,PLA2G4A,NRP1,PTPN11,HSP90AA1,MLLT4,PIK3R1,ATF2,GJA1,RPS6KB1,PRKAA1,CREB1,GSK3B,EIF2AK3,TRPC1,PIK3CA,RAB5A,CTNND1,CTNNA1,EEA1,CLTC,MAP2K4,ANXA1,PTGS2,PPP3CA,CXCL8,FOXO3,EPS15,OCLN,ITCH,HDAC4,EIF4E,F3,ETS1,PRKG1	MAPK3,MAPK12,FADD,STAT6,SRC,BCAR1,ITGB5,MYL9,RHOC,CBL,SPHK1,HRAS,CSK,CDC42,MYH9,AKT1,NFKBIA,LIMK1,SHB,CAMKK2,MLST8,ATF4,HERPUD1,GIPC1,ARRB2,MAP2K7,JUN,SRF,TEAD4,RCAN2,ACKR3,HBEGF,IGFBP7,CTGF
EGFR1 Signaling Pathway	51	-28	79	1e-06	NRAS,KRAS,SHOC2,PIK3R1,MAP3K2,SOS1,GRB7,PIK3CA,PIK3CB,JAK1,STAT1,JAK2,STAT3,MAP3K1,PRKCI,MAP3K4,ELK4,GJA1,WNK1,EGFR,PTPN12,CRK,CAV1,CAV2,NCK1,RAB5A,RASA1,PRKAR1A,PTPN11,ERRFI1,CBLB,PLD1,EPS15,HTT,SH3BGRL,REPS2,RALBP1,ABI1,SOS2,SIN3A,WASL,APPL1,APPL2,ASAP1,CTNND1,PKN2,SMAD2,ATF1,CREB1,HAT1,ITCH	HRAS,VAV3,MAPK7,MAPK3,MAP2K7,KRT7,KRT18,SNRPD2,PLEC,SRC,CBL,CRKL,GIT1,SOCS3,CSK,CDC42,PEBP1,JUN,AKT1,RPS6KA1,AP2A1,MTA2,EPS15L1,RFXANK,BCAR1,CASP9,ARAF,MCF2
Circadian rythm related genes	47	-27	74	0.009655	CLOCK,DRD1,HTR7,CREB1,NCOR1,HOMER1,PRKAA1,GFPT1,RORA,KLF9,DYRK1A,CUL1,BTBD9,SETX,KCNMA1,EZH2,HDAC2,PPP1CC,OPN3,SUV39H2,FBXL21,ROCK2,SIN3A,PRKDC,BTRC,THRAP3,TOP2A,TOP1,ZFHX3,SIRT1,NFIL3,GNAQ,GSK3B,FBXL3,NLGN1,PPP1CB,PPARA,NRIP1,KMT2A,NR1D2,UBE3A,ID2,DHX9,MAPK9,MAPK10,NAMPT,AHR	JUN,CIART,CDK4,LEP,CST3,HDAC3,AHCY,DDX5,SOX14,DDC,PRF1,MTA1,METTL3,ID3,DRD2,MAGED1,CCAR2,ATF4,NOCT,SERPINE1,RELB,UBA52,RPS27A,PPP1CA,CRTC1,MYBBP1A,BHLHE40
EGF/EGFR Signaling Pathway	47	-22	69	6.8e-05	PIK3R1,SOS1,EGFR,CAV1,ROCK1,MAPK9,STAT1,NCK1,RASA1,PTPN11,EPS15,CRK,ATXN2,JAK2,JAK1,STAT3,ABI1,CAV2,CREB1,MAP3K1,GJA1,PRKCI,SOS2,ASAP1,RAB5A,STAM2,RALBP1,REPS2,RAP1A,PLD1,ITCH,PTPN12,NCOA3,KRAS,BRAF,ERRFI1,RICTOR,RPS6KB1,IQGAP1,MAP3K2,MAP3K4,ATF1,ELK4,PCNA,CBLB,PTK2,MEF2A	AKT1,JUN,MAPK3,CDC42,SRC,VAV3,CSK,CRKL,BCAR1,PEBP1,HRAS,EPS15L1,AP2A1,AP2S1,MAPK7,EIF4EBP1,RPS6KA1,E2F1,MYBL2,ERBB2,CBL,AP2M1
Focal Adhesion	37	-32	69	0.011855	PDGFRA,HGF,PIK3R1,BRAF,THBS1,ITGB8,ROCK1,PPP1R12A,MET,CRK,ITGA2,PAK3,SPP1,PTK2,ITGAV,ITGB1,LAMB1,FIGF,CAV1,MYLK,COL1A2,MAPK9,SOS1,ARHGAP5,RAP1A,DOCK1,GSK3B,LAMC1,FN1,PIK3CA,BIRC2,MAPK6,CAV2,PIK3CB,ROCK2,EGFR,PAK2	CAPN1,THBS3,FGR,ILK,LAMA2,PARVB,IBSP,JUN,ITGA2B,SEPP1,ERBB2,ARAF,CDC42,ACTB,PAK4,RAC3,AKT2,VASP,LAMB3,FLNA,MAPK12,BIRC3,CCND3,AKT1,RHOB,ITGAM,BAD,MAPK7,SRC,BCAR1,ITGB5,MYL6
miR-targeted genes in squamous cell - TarBase	51	-11	62	0.004785	DHX57,FAM96A,FNDC3A,SPCS3,THBS1,ARFIP1,ATP6V1C1,BET1,CBFB,CUL4B,DHX40,FMNL2,HSD17B12,MET,PICALM,RAI14,SDCBP,SYNE2,TRAM1,TXNRD1,FGF2,FNDC3B,GALNT7,GFPT1,LAMC1,RARS,RTN4,SLC12A2,SLC38A1,SPTLC1,ARCN1,ARF4,GOLGA7,NRP1,ATP2A2,ATRX,CPNE8,GALNT1,IDH1,KDELC2,PRPF40A,SEC23A,SLC38A2,TMED10,TMED2,TMED7,TICAM2,NRAS,ELOVL5,MAGT1,PDCD4	ATP6V1F,GYS1,HMGA1,MRPS33,POLD2,POLR2C,DNAJB1,RAB34,RHEB,AP2A1,NF2
TGF-beta Signaling Pathway	48	-13	61	1.9e-05	STRAP,CDK1,ZFYVE16,RNF111,MAP3K7,UCHL5,SPTBN1,BTRC,CUL1,ATF2,PIK3R1,SOS1,TGFBR1,ZFYVE9,SMAD2,SMAD4,CAV1,WWP1,ITCH,COL1A2,MET,APP,RBL1,ETS1,NUP153,ZEB2,SNW1,SKIL,PPM1A,RUNX2,MEF2A,KLF6,PIAS1,PIAS2,SUMO1,YAP1,CREBBP,PAK2,ROCK1,ITGB1,PTK2,MAPK9,MAP2K4,SIN3A,ITGA2,THBS1,FN1,RBL2	TRAP1,AKT1,TGFB1,CDKN1A,JUNB,E2F4,JUN,UBE2I,TGFB1I1,MAPK3,CDC42,BCAR1,SRC
Brain-Derived Neurotrophic Factor (BDNF) signaling pathway	36	-18	54	0.020347	MAPK9,NCK1,PTPN11,NCAM1,TIAM1,RANBP9,SHC4,FRS2,BDNF,CREB1,PPP2CA,FOXO3,KIDINS220,RPS6KB1,GSK3B,PIK3R1,MAP3K1,ADAM17,MAPK10,EIF4E,CASP3,YBX1,DPYSL2,APC,DLG1,PIK3CA,PRKAA1,MAP3K2,MEF2A,RAP1A,JAK2,STAT1,STAT3,SPP1,BMP2,EIF2S2	VAV3,MAPK3,SORT1,GRIA2,CRTC1,EIF4EBP1,AKT1,BAD,MAPK7,CDC42,HRAS,SRC,NFKBIA,JUN,RPS6KA1,CAMK1,GRIP1,RHOG
Endoderm Differentiation	41	-12	53	0.025638	STAT1,UBR5,BTAF1,EPB41L5,LAMC1,RTF1,RFX7,BPTF,NAA15,LRPPRC,CTBP2,CEBPZ,WDHD1,SP4,EXT1,PABPC1,POU5F1,CTR9,SMAD4,ZFHX4,TAF5,MTF2,APP,AEBP2,BMPR1A,SMAD2,CAND1,ASCC3,CDC73,ELK4,PIAS1,NLK,CUL4B,SCHIP1,TRIM5,PHF6,TCF4,EMSY,NR3C1,EZH2,APC	SOX21,NME1,TGFB1,RARG,HOXA1,DUSP5,MAD2L2,SOX2,CRTC1,RGS10,NABP2,VAV3
Cytoplasmic Ribosomal Proteins	3	-47	50	0	RPS25,RPL5,RPS6KB1	RPL10A,RPL8,RPL9,RPLP2,RPLP1,RPL35,RPL7A,RPL13,RPL14,RPL18A,RPL18,RPL19,RPL21,RPL27,RPL28,RPL29,RPL32,RPL39,UBA52,RPL41,RPL36A,RPS3,RPS9,RPS5,RPS15A,RPS16,RPS20,RPS14,RPS29,RPS11,RPS15,RPS7,RPS8,RPS10,RPS19,RPS26,RPS27,RPS27A,RPS28,FAU,RPLP0,RPS6KA1,RPL11,RPL10,RPL30,RPS2,RPS6KB2
Olfactory receptor activity	5	-42	47	0	OR4Q3,OR7D2,OR10P1,OR1N2,OR4F15	OR1E1,OR1F1,OR2H1,OR5V1,OR6C70,OR8K3,OR9G1,OR1L6,OR2T34,OR4K15,OR5P2,OR2B3,OR2G3,OR10H3,OR8B12,OR2J3,OR51I1,OR4D1,OR4M1,OR8H3,OR51E2,OR56A1,OR8U1,OR5L1,OR1D2,OR56B4,OR10A7,OR3A2,OR6C4,OR10J3,OR2AE1,OR2B11,OR51M1,OR2K2,OR5AP2,OR13G1,OR52M1,OR4S2,OR5AK2,OR8B3,OR5B2,OR1S2
Androgen receptor signaling pathway	28	-15	43	4.6e-05	PTK2,ROCK1,ROCK2,DSTN,NCOR1,SMAD4,NCOA3,NR2C2,PIAS1,STAT3,RUNX2,RB1,EGFR,SUMO1,CREB1,SIRT1,UBE3A,KAT2B,RNF6,SIN3A,CAV1,NCOA1,PIK3R1,PIAS2,BRCA1,CREBBP,NCOA4,GSK3B	CDC42,RHOB,PATZ1,AES,CDKN1A,BAG1,STUB1,ETV5,SRC,FLNA,AKT1,UBE2I,JUN,TGFB1I1,RNF4
Electron Transport Chain	8	-35	43	0.004131	COX11,NDUFS4,SLC25A4,UQCRB,SDHD,NDUFB5,NDUFA5,ATP5F1	ATP5A1,ATP5I,COX6B1,ATP5G2,NDUFA8,NDUFA3,NDUFV2,NDUFA6,NDUFA2,COX5A,NDUFS7,COX6A1,COX4I1,SLC25A6,NDUFB3,ATP5G1,COX7A2,ND6,NDUFAB1,COX7B,NDUFB7,UQCRC1,COX5B,COX8A,NDUFV1,ATP5G3,SURF1,NDUFB2,NDUFS2,ATP5D,NDUFV3,NDUFA10,UCP2,NDUFS8,NDUFB8
JAK/STAT	27	-16	43	0.04466	JAK2,PTPN11,STAT1,STAT3,PIK3R1,SOS1,CREB1,RPS6KB1,EIF4E,GSK3B,IKBKB,CHUK,YWHAZ,KHDRBS1,PRKAA1,PTK2,LEPR,EGFR,PIK3CA,PIK3CB,ITGB1,JAK1,ROCK1,ROCK2,CFL2,MAPK9,NCOA1	HRAS,MAPK3,JUN,RPS6KA1,AKT1,EIF4EBP1,BAD,CISH,SOCS3,CBL,FLNA,BAX,LEP,SRC,CDC42,TIMP1
Retinoblastoma (RB) in Cancer	32	-11	43	7.9e-05	RB1,SKP2,CCNA2,CCNE2,CDK1,PLK4,NPAT,CCDC6,TOP2A,RFC3,MCM4,POLA1,SMARCA2,CHEK1,PCNA,MSH6,PRKDC,BARD1,TTK,SMC2,RRM1,DHFR,DCK,HLTF,ANLN,HMGB1,POLE2,SMC3,SMC1A,SIN3A,RBBP4,CDK6	E2F1,RBP1,MCM7,CDKN1A,CDC25A,CCND3,POLE,CDT1,RABIF,FANCG,CDK4
Pyrimidine metabolism	14	-28	42	5.2e-05	DPYD,CMPK1,ENTPD4,PNPT1,ENPP1,RRM1,DCK,RRM2B,POLA1,POLR2B,POLR3B,POLR3G,TWISTNB,POLE2	DTYMK,DCTPP1,NT5C,UCK2,TK1,NME1-NME2,NME1,NME2,NME6,UPP1,UCKL1,ZNRD1,POLR2G,POLR3D,POLR3H,POLR1C,POLR1D,POLR1E,POLR2C,POLR2D,POLR2E,POLR2J2,POLR2J3,POLR2L,POLR3K,POLR2I,POLD2,POLE4
Cell Cycle	28	-13	41	0.011617	BUB1B,ATM,ATR,BUB1,CDK6,CCNH,GSK3B,CCNA2,PCNA,HDAC2,PRKDC,CDK1,RBL1,SKP2,SMC1A,E2F6,SMAD4,HDAC4,CCNE2,APC,YWHAG,YWHAZ,MCM4,MCM8,MCM10,ORC2,ORC3,ORC4	PTTG1,CDK4,CCND3,HDAC3,HDAC6,ESPL1,E2F1,E2F4,UBE2F,TGFB1,MCM2,MCM5,MCM7
Histone Modifications	9	-31	40	0	ASH1L,EZH2,NSD1,SETBP1,SETD2,SETD3,SETDB2,SUV39H2,AEBP2	H3F3B,HIST1H3D,HIST1H3J,HIST2H3A,HIST2H3C,HIST2H3D,DOT1L,EHMT2,SETDB1,SMYD5,HIST1H4C,HIST1H4H,HIST1H4I,HIST1H4J,HIST4H4,HIST1H3C,HIST1H3G,HIST1H4K,HIST1H4E,HIST1H3H,HIST1H4B,HIST1H4L,HIST1H3A,HIST1H4G,HIST1H3F,HIST1H3B,HIST1H4F,HIST1H3I,HIST1H4D,HIST1H4A,HIST1H3E
Integrin-mediated Cell Adhesion	20	-20	40	0.013987	BRAF,ROCK2,ROCK1,SOS1,CAV1,CAV2,PTK2,CAPN2,CAPN7,PAK2,PAK3,DOCK1,CRK,RAP1A,MAPK6,ITGA2,ITGAV,ITGB1,ITGB8,MAPK10	CDC42,ARAF,MAPK7,RAC3,VAV3,SEPP1,HRAS,CSK,BCAR1,SRC,AKT1,AKT2,PAK4,MAPK12,CAPN1,ITGA2B,ITGAM,ITGB5,ILK,VASP
DNA IR-damage and cellular response via ATR	32	-7	39	0.003826	ATR,MSH2,TP53BP1,PRKDC,PCNA,APAF1,USP1,CLSPN,SMC1A,BLM,RAD50,NBN,POLN,RAD17,BRCA2,EXO1,BRCA1,DCLRE1A,ATM,CASP3,RNF8,YAP1,TOPBP1,BRIP1,HUS1,BARD1,BRCC3,WRN,RECQL,RMI1,PALB2,RBBP8	RAD51,E2F1,FANCA,CASP9,MCM2,TRIM28,FEN1
DNA IR-damage and cellular response via ATR	30	-6	36	0.013634	ATR,RBBP8,MSH2,TP53BP1,PRKDC,PCNA,USP1,CLSPN,SMC1A,BLM,RAD50,NBN,POLN,RAD17,XRCC5,BRCA2,EXO1,BRCA1,DCLRE1A,ATM,RNF8,TOPBP1,BRIP1,HUS1,BARD1,BRCC3,WRN,RECQL,RMI1,PALB2	RAD51,E2F1,FANCA,MCM2,TRIM28,FEN1
TNF alpha Signaling Pathway	22	-14	36	0.027267	MAP2K4,MAPK9,SOS1,MAP3K7,TAB2,TAB3,CHUK,IKBKB,CUL1,BTRC,PPP2CA,CREBBP,MAP3K1,TBK1,TANK,BIRC2,CASP3,RFK,HSP90AA1,APAF1,KRAS,NRAS	MAP2K7,JUN,MAPK3,TRAP1,FADD,AKT1,NFKBIA,BIRC3,NOX1,BID,BAX,BAD,CASP9,HRAS
Metapathway biotransformation	10	-25	35	0.003254	CYP1B1,FMO4,CYP4V2,CYP51A1,KCNAB3,GSTCD,MGST1,HS2ST1,HS3ST3A1,HS6ST3	CYP3A5,AKR1A1,AKR7A3,EPHX1,COMT,NNMT,CYP19A1,AKR1D1,AKR1B1,KCNAB1,GPX1,GPX4,GSTM2,GSTM3,GSTM4,GSTO1,GSTT2,GSTT2B,GSTZ1,MGST3,GSS,NAT14,CHST7,CHST10,NDST1
GPCRs, Class A Rhodopsin-like	10	-24	34	0	DRD1,HTR7,BDKRB2,EDNRA,F2RL2,OPN3,PTGFR,GPR85,GPR21,GPR75	DRD2,HRH3,BDKRB1,FPR1,XCR1,MC1R,NTSR1,OPRM1,SSTR5,OR1F1,OR1E1,OR1D2,OR5V1,OR2B3,OR2J3,OR2H1,OR10H3,P2RY13,P2RY12,GPR4,P2RY11,CNR2,OR3A2,GPR171
Leptin signaling pathway	22	-12	34	0.007486	LEPR,STAT1,JAK2,NCOA1,PIK3R1,STAT3,KHDRBS1,PTPN11,CHUK,IKBKB,EIF4E,GSK3B,PTK2,CFL2,CREB1,SOS1,EGFR,RPS6KB1,PRKAA1,JAK1,ROCK1,ROCK2	TIMP1,SOCS3,ERBB2,SRC,AKT1,CISH,EIF4EBP1,BAX,BAD,HRAS,MAPK3,CDC42
Vitamin D Receptor Pathway	16	-18	34	0.002359	LPGAT1,HIF1A,PRDM1,RASGRP1,THBD,NRIP1,SPP1,ASAP2,CD9,TNFRSF11B,ATP2B1,DACT2,TGFB2,ZNF257,CCNC,IGFBP3	ITGAM,TREM1,VDR,TNFSF4,BGLAP,MYO9B,BDKRB1,TGFB1,MED9,NOX1,JUNB,CDC34,CYP3A5,S100A6,KRT34,ID1,CA9,CDKN1A
Signaling Pathways in Glioblastoma	21	-12	33	0.027689	PIK3R1,ERRFI1,RB1,PIK3C2A,PIK3CA,PIK3CB,FOXO3,PDGFRA,EGFR,MET,NRAS,KRAS,BRAF,PRKCI,MAP2K4,CDK6,MDM4,ATM,BRCA1,BRCA2,MSH6	AKT1,AKT2,SRC,ERBB2,CBL,HRAS,ARAF,MAP2K7,MAPK3,CDKN1A,CDK4,E2F1
Sudden Infant Death Syndrome (SIDS) Susceptibility Pathways	23	-10	33	0.041631	REST,YBX1,CREB1,NR3C1,HSPD1,CTCF,RORA,ACADM,HIF1A,CREBBP,SP3,POU5F1,BDNF,GJA1,YWHAZ,YWHAG,PRKAR1A,PRKACB,CASP3,SLC25A4,SNAP25,HSP90B1,SPTBN1	DEAF1,DDC,CC2D1A,SCN5A,JUN,MAZ,BHLHE40,SOX2,SNTA1,POU2F2
Human Thyroid Stimulating Hormone (TSH) signaling pathway	17	-13	30	0.002383	BRAF,TTF1,STAT3,PIK3CA,PIK3R1,RPS6KB1,RB1,CREB1,PDE4D,GNAI1,GNA13,GNAQ,GNAI3,JAK2,JAK1,PLD1,RAP1A	CCND3,MAPK3,TSHB,CGA,HRAS,JUN,E2F1,SCRIB,SRC,AKT1,CDK4,RPS6KA1,APEX1
Pathways Affected in Adenoid Cystic Carcinoma	23	-7	30	0.002046	SMARCA2,ATRX,CREBBP,MORF4L1,KAT6A,SETD2,NSD1,KMT2C,CMTR2,ARID4B,BCOR,JMJD1C,PRKDC,ATM,SMC1A,BRCA1,TLK1,NFIB,NCOR1,ERBB2IP,PIK3CA,FOXO3,FBXW7	HIST1H1E,HIST1H2AL,MYCN,ERBB2,HRAS,AKT1,CNTN6
Processing of Capped Intron-Containing Pre-mRNA	20	-10	30	0	HNRNPA2B1,HNRNPA1,HNRNPF,HNRNPH2,HNRNPK,HNRNPH1,HNRNPR,YBX1,DHX9,SRSF7,SRSF2,SRSF1,SRSF5,CDC40,SRSF11,SRSF4,NCBP2,NCBP1,EIF4E,ZC3H11A	PTBP1,PCBP1,CD2BP2,RNPS1,ALYREF,CHTOP,POLDIP3,DDX5,EIF4A3,CASC3
Calcium Regulation in the Cardiac Cell	17	-11	28	0.008301	CALM1,ATP2B1,GNB4,PRKACB,GJA1,ITPR2,CAMK2D,CACNA1A,YWHAZ,GNG12,GNAQ,GNAI3,PRKAR1A,ATP2A2,GNAI1,YWHAG,ATP1B1	RGS6,ARRB2,RGS10,GJB6,ANXA6,GNB2,PKIG,ARRB1,CAMK1,RGS3,GRK6
DNA Damage Response	18	-10	28	0.020739	RB1,ATR,SMC1A,ATM,TLK2,CDK6,CHEK1,TLK1,CCNE2,RAD17,PRKDC,RRM2B,RAD50,NBN,BRCA1,CASP3,HUS1,APAF1	CDKN1A,CDK4,CASP9,CDC25A,BID,E2F1,BAX,CCND3,H2AFX,RAD51
DNA IR-Double Strand Breaks (DSBs) and cellular response via ATM	20	-7	27	0.00299	ATR,ATM,EXO1,TP53BP1,STK3,SMC3,PCNA,APAF1,BLM,RAD50,NBN,RAD17,BRCA2,SMC1A,BRCA1,CASP3,RNF8,RIF1,ATF2,YAP1	RAD51,BAX,E2F1,CASP9,BAK1,TRIM28,BID
Interleukin-11 Signaling Pathway	17	-10	27	4e-06	IKBKB,IL6ST,IL11RA,YES1,JAK2,STAT3,PIK3R1,PTPN11,STAT1,CREB1,ATF1,CHUK,RUNX2,JAK1,RPS6KB1,PIAS1,ITGA2	PPP2R4,HRAS,RPS6KA1,AKT1,MAPK3,SOCS3,BGLAP,IBSP,SRC,TGFB1
Major pathway of rRNA processing in the nucleolus and cytosol	10	-16	26	1e-06	RIOK3,RIOK2,LTV1,RIOK1,SKIV2L2,NOL11,EXOSC10,RPS27L,C1D,DIS3	TSR1,RRP1,BOP1,RPS8,RPS5,RPS16,RPS7,RPS11,RPS27,RPS14,RPS15A,RPS28,RPS9,RPS2,EXOSC5,WBSCR22
RIG-I-like Receptor Signaling	16	-9	25	0.021398	CYLD,CXCL8,DDX58,ATG5,IFIH1,TANK,SIKE1,TBK1,DDX3X,CHUK,IKBKB,MAPK10,MAPK9,MAP3K7,MAP3K1,SNW1	MAPK12,ISG15,TRIM25,NLRX1,MAVS,RNF125,FADD,PIN1,NFKBIA
Apoptosis-related network due to altered Notch3 in ovarian cancer	19	-5	24	0.008411	NET1,SERBP1,CUL5,RIPK2,CUL1,CTNNA1,HSPD1,HELLS,PTK2,ETS1,RPS6KB1,GCLC,THBS1,TNFRSF21,APP,NRG1,PAK2,IL7R,HSPA5	CDKN1A,AKT1,NGFRAP1,SOCS3,VAV3
Alzheimers Disease	14	-9	23	0.00059	APP,ADAM10,IDE,CALM1,PPP3CA,ADAM17,APAF1,CASP3,GNAQ,ATP2A2,EIF2AK3,ITPR2,CAPN2,GSK3B	APBB1,PSENEN,FADD,HSD17B10,BID,BAD,CASP9,MAPK3,CAPN1
Eukaryotic Transcription Initiation	12	-11	23	0.000169	TAF5,TAF7,TAF9,TAF13,GTF2F2,CDK7,GTF2H1,POLR3B,POLR2B,CCNH,MNAT1,GTF2H3	ILK,ERCC2,POLR2F,POLR2C,POLR2E,POLR3D,POLR3H,POLR3K,POLR2I,POLR2G,POLR1D
Exercise-induced Circadian Regulation	17	-6	23	0.003417	KLF9,CBX3,AZIN1,PSMA4,ZFR,SUMO1,PURA,NCOA4,UGP2,NCKAP1,VAPA,IDI1,TOB1,NR1D2,CLOCK,EIF4G2,QKI	HERPUD1,HIST1H2BN,CAST,GSTM3,TUBB3,RBPMS
IL-6 signaling pathway	16	-6	22	0.001737	STAT3,STAT1,SOS1,MAP2K4,RPS6KB1,PIK3R1,GSK3B,IL6ST,JAK1,JAK2,PTPN11,PRDM1,MAP3K7,CREBBP,NLK,NCOA1	MAPK3,AKT1,SOCS3,BAD,JUNB,TIMP1
Energy Metabolism	14	-7	21	0.0143	TFAM,PPP3CA,PPARA,GSK3B,CREB1,TFB2M,PRKAA1,MEF2A,GABPA,FOXO3,ATF2,MED1,SIRT1,NCOA1	UCP2,NRF1,MEF2B,MYBBP1A,PPRC1,PRMT1,SIRT3
Asparagine N-linked glycosylation	9	-11	20	0.038847	ALG6,ALG11,PGM3,PDIA3,MANEA,MGAT2,FUT8,MGAT5,FPGT	ALG3,ALG1,DOLPP1,MPI,MGAT1,MGAT3,ST6GAL1,ST3GAL4,MPDU1,CHST10,NUDT14
Assembly of the primary cilium	18	-2	20	0	TRIP11,IFT88,IFT80,IFT57,WDR19,WDR35,TTC21B,RP2,BBS5,BBS7,BBS9,TNPO1,ARL13B,TTBK2,CCP110,CEP97,SEPT2,TTC26	IFT46,HDAC6
Cilium Assembly	18	-2	20	0	TRIP11,IFT88,IFT80,IFT57,WDR19,WDR35,TTC21B,RP2,BBS5,BBS7,BBS9,TNPO1,ARL13B,TTBK2,CCP110,CEP97,SEPT2,TTC26	IFT46,HDAC6
IL-2 Signaling Pathway	9	-10	19	0.016058	STAT3,STAT1,SOS1,PTPN11,RPS6KB1,JAK1,SYK,NMI,PIK3R1	AKT1,CBL,IL2,CRKL,JUN,CISH,MAPK3,RPS6KB2,SOCS3,HRAS
IL-5 Signaling Pathway	11	-7	18	0.034841	RPS6KB1,JAK2,LYN,PTPN11,PIK3R1,GSK3B,SPRED1,SOS1,STAT3,STAT1,SYK	MAPK3,AKT1,HRAS,RPS6KA1,IL5,JUN,RPS6KB2
Allograft Rejection	5	-12	17	0.04719	PDGFRA,STAT1,GABPA,CD55,CASP3	IL2,CCL21,ABCB1,PRF1,TGFB1,IL5,IL17A,CD40LG,C1QC,CASP9,HLA-DOA,HLA-DPB1
Cell junction organization	10	-7	17	0.001556	FERMT2,ITGB1,LIMS1,ARHGEF6,INADL,MPP5,CTNNA1,CTNND1,CADM1,PVRL3	CD151,PLEC,ILK,VASP,PARVB,F11R,PVR
G13 Signaling Pathway	14	-3	17	0.028855	GNA13,MAPK10,PPP1CB,MAP3K4,PAK3,IQGAP1,RPS6KB1,ROCK1,ROCK2,PIK3CA,PIK3CB,CFL2,CALM1,WASL	LIMK1,ARHGDIG,CDC42
Glycogen Metabolism	10	-7	17	0.014743	GSK3B,AGL,UGP2,PHKB,PPP2R5E,PPP2R5C,PPP2R3A,PPP2CA,CALM1,PPP2R1B	GYS1,PYGM,PYGB,PGM1,PHKA2,PPP2R1A,PPP2R4
Prion disease pathway	14	-3	17	0.012669	CREB1,STAT3,HSP90B1,RAD21,NCAM1,PDIA3,CTCF,PRNP,CASP3,EBF1,SMC3,PTK2,CHD2,HSPA5	RFX5,MAPK3,POU2F2
Fluoropyrimidine Activity	7	-9	16	0.020177	DHFR,DPYD,ABCC4,RRM1,CES1,GGH,PPAT	UPP1,TK1,SLC22A7,FPGS,SMUG1,XRCC3,ERCC2,UCK2,SLC29A1
MAPK Cascade	8	-8	16	0.002772	NRAS,KRAS,BRAF,MAP3K1,MAP3K2,MBP,MAP2K4,MAPK10	SIPA1,HRAS,RRAS,ARAF,MAPK3,MAP2K7,JUN,MAPK12
Photodynamic therapy-induced HIF-1 survival signaling	9	-7	16	0.044438	SLC16A1,PDHA1,EGLN1,HIF1A,PTGS2,ANGPT1,IGFBP3,ANGPT2,BNIP3L	PFKL,PGK1,HK1,SERPINE1,BID,BAX,BAK1
RNA Polymerase I, RNA Polymerase III, and Mitochondrial Transcription	7	-9	16	0	RRN3,TTF1,ZNF143,SSB,NFIB,TFAM,TWISTNB	TAF1C,POLR1D,POLR1C,PTRF,POLR2F,POLR2E,ZNRD1,POLR2L,POLR1E
Signaling of Hepatocyte Growth Factor Receptor	11	-5	16	0.020177	PTPN11,PIK3CA,STAT3,CRK,PTK2,RASA1,RAP1A,ITGB1,DOCK1,HGF,SOS1	JUN,SRC,CRKL,HRAS,MAPK3
Ethanol effects on histone modifications	9	-6	15	0.015717	DHFR,ATF2,HDAC2,KAT2B,MTR,HAT1,ALDH2,ALDH1A3,HDAC4	AHCY,EHMT2,SLC19A1,ACSS2,HDAC3,HDAC6
Gastric Cancer Network 1	12	-3	15	0.00675	KIF15,ESM1,LIN9,CENPF,NUP107,MCM4,KIF20B,APC,E2F7,ECT2,TOP2A,CEP192	MYBL2,UBE2C,GATS
Gastric Cancer Network 2	11	-4	15	0.027934	MTDH,PLAC8,RAD17,DSCC1,RFC3,TOP2A,AHCTF1,FAM91A1,ATAD2,CEBPZ,EGFR	LMNB2,UBE2C,S100A6,CHTF8
GPCRs, Other	5	-10	15	8.3e-05	GPR135,HTR7,EDNRA,ALG6,PTGFR	TAAR2,GPR88,NTSR1,P2RY13,OR1F1,OR1E1,OR2H1,GHRHR,GRM1,P2RY11
Hair Follicle Development: Cytodifferentiation (Part 3 of 3)	10	-5	15	0.013622	PERP,NR3C1,RBPJ,PHLDA1,BMPR1A,WNT5A,EGFR,FZD1,ADAM17,TCF4	JUN,GJB6,SOX2,LRIG1,CTGF
Mitotic G1-G1/S phases	8	-7	15	0	MCM10,RB1,DYRK1A,PCNA,TOP2A,RBL1,CDK1,RBL2	CKS1B,CDC25A,CDT1,CDKN1A,PKMYT1,E2F1,MYBL2
XBP1(S) activates chaperone genes	5	-10	15	0.003369	DNAJB11,FKBP14,GFPT1,SSR1,DNAJC3	ACADVL,DDX11,GOSR2,HDGF,KLHDC3,SERP1,PREB,WFS1,YIF1A,ASNA1
Extracellular vesicle-mediated signaling in recipient cells	10	-4	14	0.039079	SMAD4,SMAD2,WNT5A,EGFR,HGF,NRAS,KRAS,TGFBR1,TGFB2,APC	ERBB2,TGFB1,AKT1,HRAS
HIV Life Cycle	6	-8	14	0	RNMT,RNGTT,XPO1,TCEA1,PSIP1,PDCD6IP	FEN1,BANF1,RANBP1,RANGAP1,ELL,RCC1,HMGA1,FURIN
Human Complement System	6	-8	14	0	CFH,ITGA2,PTX3,LAMB1,LAMC1,GNAI3	KLKB1,ARRB2,CFHR4,CR2,RPS19,ITGA2B,IBSP,FPR1
TCF dependent signaling in response to WNT	11	-3	14	0	XIAP,CDC73,APC,BTRC,CSNK1A1,YWHAZ,XPO1,USP34,RYK,GSK3B,CHD8	CSNK1G2,DVL1,CCDC88C
Deubiquitination	12	-1	13	0	UCHL5,USP9X,SMAD4,DDX58,YOD1,USP34,ZRANB1,PSMD14,CYLD,BARD1,VCPIP1,CDK1	ATXN3
Follicle Stimulating Hormone (FSH) signaling pathway	4	-9	13	0.029631	CREB1,RPS6KB1,APPL1,BDNF	CGA,MAPK3,AKT1,GRK6,RPS6KB2,EIF4EBP1,SRC,CYP19A1,RHEB
Host Interactions of HIV factors	6	-7	13	0	KPNA1,KPNB1,XPO1,ELMO1,BTRC,NPM1	RANBP1,RANGAP1,DOCK2,AP2M1,PACS1,RCC1,CDK9
TP53 Regulates Transcription of Cell Death Genes	9	-4	13	1.7e-05	APAF1,CREBBP,BNIP3L,ZNF420,TP53INP1,IGFBP3,PERP,RABGGTB,CHM	BAX,BCL2L14,TP53I3,PRELID1
Transcriptional regulation by the AP-2 (TFAP2) family of transcription factors	6	-7	13	0.004195	CREBBP,NPM1,HSPD1,DEK,EGFR,ATAD2	CGA,ERBB2,KIT,CDKN1A,UBE2I,NOP2,MYBL2
Transcriptional regulation of white adipocyte differentiation	6	-7	13	0.00013	KLF5,EBF1,NCOR1,NCOA3,CREBBP,NCOA1	HDAC3,HELZ2,PCK1,TGFB1,CDK4,CCND3,LEP
Activation of gene expression by SREBF (SREBP)	6	-6	12	0.00252	GGPS1,IDI1,CYP51A1,SC5D,ELOVL6,SCD	DHCR7,MVD,FDPS,FDFT1,MVK,PMVK
Chromatin organization	6	-6	12	0	CREBBP,CLOCK,ATF7IP,SETD2,BRWD1,PRMT3	SETDB1,COPRS,WDR77,PRMT1,DOT1L,RPS2
GPCR ligand binding	2	-10	12	0	PTGFR,CD55	XCR1,FPR1,RXFP3,PTGDR2,P2RY12,P2RY13,P2RY11,FFAR1,GHRHR,GPRC6A
MicroRNAs in cardiomyocyte hypertrophy	10	-2	12	4.8e-05	FGF2,PIK3CA,PIK3CB,PIK3R1,ROCK1,ROCK2,STAT3,FZD1,LRP6,WNT5A	AKT1,AKT2
Regulation of lipid metabolism by Peroxisome proliferator-activated receptor alpha (PPARalpha)	8	-4	12	0	PPARA,TBL1XR1,ABCA1,ACADM,ACSL1,ME1,TNFRSF21,TXNRD1	CTGF,FDFT1,PLIN2,TRIB3
RNA Polymerase I Transcription	3	-9	12	3.4e-05	RRN3,TTF1,TWISTNB	TAF1C,POLR1D,POLR1C,PTRF,POLR2F,POLR2E,ZNRD1,POLR2L,POLR1E
Selenium Micronutrient Network	6	-6	12	0.00252	MTR,GGT1,RFK,DIO2,PRDX3,ABCA1	PRDX5,PRDX4,SAA4,SAA2,PRDX2,FLAD1
Signaling by PTK6	4	-8	12	8e-06	STAT3,KHDRBS1,RASA1,HIF1A	STAP2,SOCS3,BCAR1,AKT1,CBL,ARAP1,PELP1,GPNMB
Transcriptional regulation by RUNX1	11	-1	12	0	KMT2A,RSPO3,HIPK2,LIFR,OCLN,CREBBP,ELF1,ELF2,SOCS4,YAP1,ITCH	SOCS3
Cell surface interactions at the vascular wall	8	-3	11	0	SOS1,ANGPT2,ANGPT1,GRB7,PTPN11,JAM3,OLR1,CAV1	F11R,TREM1,BSG
DDX58/IFIH1-mediated induction of interferon-alpha/beta	6	-5	11	1e-06	DDX58,SIKE1,TANK,MAP3K1,CYLD,ITCH	MAVS,FADD,RNF125,PIN1,NLRX1
Generic Transcription Pathway	6	-5	11	0	CCNC,MED1,MED7,MED13,MED23,RBPJ	MED25,MED24,MED16,MED15,MED27
Glycerophospholipid biosynthesis	5	-6	11	1e-06	GNPAT,AGPAT5,LCLAT1,PLA2G4C,GPCPD1	PEMT,PTDSS2,CDS2,PGP,TAZ,PTPMT1
HDR through Homologous Recombination (HR) or Single Strand Annealing (SSA)	6	-5	11	0	BRCC3,TOPBP1,CHEK1,BRCA2,RAD51B,PALB2	UBE2I,BABAM1,RAD51,XRCC3,MUS81
Parkinsons Disease Pathway	6	-5	11	0.017179	EPRS,ATXN2,CCNE2,CASP6,CASP3,APAF1	DDC,HTRA2,UBA1,MAPK12,CASP9
RIG-I/MDA5 mediated induction of IFN-alpha/beta pathways	6	-5	11	1e-06	DDX58,SIKE1,TANK,MAP3K1,CYLD,ITCH	MAVS,FADD,RNF125,PIN1,NLRX1
Apoptotic execution phase	7	-3	10	0	DSG2,OCLN,BIRC2,ROCK1,CLSPN,PAK2,APC	DBNL,GSN,PLEC
Cell Differentiation - meta	5	-5	10	0.019569	EZH2,ID2,MEF2A,RUNX2,STAT3	SRF,PAX7,MEF2B,SOX2,TLX1
DNA Double Strand Break Response	6	-4	10	0	BRCA1,NBN,RAD50,BARD1,TP53BP1,BRCC3	UBE2I,BABAM1,PPP5C,APBB1
Folate Metabolism	3	-7	10	0.019569	DHFR,RFK,ABCA1	SLC19A1,AHCY,GART,SAA4,SAA2,IL2,FLAD1
Hematopoietic Stem Cell Differentiation	6	-4	10	0.0001	LMO2,RIOK3,ELF1,ZNF792,NLK,CRLF3	ZNF835,NCKAP1L,IL5,TGFB1
Metabolism of carbohydrates	1	-9	10	0	AGL	SLC25A1,PCK1,SLC25A10,GALK1,GALT,PGLS,SLC37A4,AKR1B1,AKR1A1
Mitotic G2-G2/M phases	4	-6	10	0	CDK1,XPO1,CENPF,PHLDA1	PKMYT1,NUMA1,CDC25A,MYBL2,CDKN1A,FKBPL
RNA Polymerase II Transcription	4	-6	10	0	RNGTT,RNMT,TCEA1,SUPT16H	ELL,TCEB2,NELFCD,NELFE,NELFB,CDK9
Signaling by EGFR	6	-4	10	1e-06	PIK3R1,PIK3CA,PTPN11,SOS1,EGFR,PTPRK	EPS15L1,CBL,CSK,LRIG1

## Sheet: GBM_SUIT2 consensus
Gene Symbol	GBM_Fold Change	SUIT2 Fold Change			P-bi-TAT					P-bi-TAT				Gene Symbol	GBM_Fold Change	SUIT2 Fold Change
PPIP5K2	14.41	2.48	0.879223		737 genes consensus expression signature					768 genes consensus expression signature				PPIP5K2	14.41	2.48	0.876705
BCLAF1	9.75	2.9								Single gene name records				BCLAF1	9.75	2.9
ATP2B1	9.24	2.86			534 UP					553 UP				ATP2B1	9.24	2.86
KRIT1	9.15	2.57			203 DOWN					215 DOWN				KRIT1	9.15	2.57
LRRC58	8.68	1.66												LRRC58	8.68	1.66
MATR3; SNORA74A; SNHG4	8.24	1.62												MATR3	8.24	1.62
CCDC14	8.13	2.44												SNORA74A	8.24	1.62
PARP14	7.66	4.56												SNHG4	8.24	1.62
OPA1	7.53	1.79												CCDC14	8.13	2.44
USP24	7.49	1.76												PARP14	7.66	4.56
CPD	7.43	2.21												OPA1	7.53	1.79
SLC7A11	7.33	2												USP24	7.49	1.76
DST	7.23	2.6												CPD	7.43	2.21
CWC22	7.21	2.65												SLC7A11	7.33	2
TOP2B; MIR4442	7.17	2.17												DST	7.23	2.6
NCAPG	7.07	1.78												CWC22	7.21	2.65
TAX1BP1	7.02	3.29												TOP2B	7.17	2.17
MYCBP2	6.63	2.38												MIR4442	7.17	2.17
TRAPPC11	6.52	2.45												NCAPG	7.07	1.78
ARHGAP5	6.51	1.93												TAX1BP1	7.02	3.29
MARCH7	6.43	2.51	Hs.529272	MARCH7; AXO; AXOT; RNF177; MARCH-VII										MYCBP2	6.63	2.38
ARHGEF12	6.41	2.28												TRAPPC11	6.52	2.45
MPHOSPH9	6.4	1.66												ARHGAP5	6.51	1.93
RNF6	6.39	1.83												MARCH7	6.43	2.51	Hs.529272	MARCH7; AXO; AXOT; RNF177; MARCH-VII
OSTM1	6.2	2.06												AXO	6.43	2.51
ZNF644	6.07	3.24												AXOT	6.43	2.51
DNAJC13	6.04	2.7												RNF177	6.43	2.51
FBXO30	6.04	3.33												ARHGEF12	6.41	2.28
HAT1	5.88	1.95												MPHOSPH9	6.4	1.66
ARFIP1	5.8	1.92												RNF6	6.39	1.83
CAMSAP2	5.72	1.84												OSTM1	6.2	2.06
RBM27	5.71	3.17												ZNF644	6.07	3.24
ZNF654	5.68	1.86												DNAJC13	6.04	2.7
ANKIB1	5.66	1.7												FBXO30	6.04	3.33
QSER1	5.64	2.14												HAT1	5.88	1.95
MCM8	5.63	1.87												ARFIP1	5.8	1.92
SEPT7	5.56	2.53	Hs.191346	Septin 7										CAMSAP2	5.72	1.84
IBTK	5.5	2												RBM27	5.71	3.17
IL6ST	5.41	2.89												ZNF654	5.68	1.86
ERGIC2	5.39	2.26												ANKIB1	5.66	1.7
HACD2	5.38	1.52												QSER1	5.64	2.14
MAN2A1	5.36	2.27												MCM8	5.63	1.87
ORC3	5.34	2.59												SEPT7	5.56	2.53	Hs.191346	Septin 7
NOP58	5.33	3.63												IBTK	5.5	2
DDX46	5.28	2.97												IL6ST	5.41	2.89
KLHL9	5.25	1.68												ERGIC2	5.39	2.26
MAPK6	5.24	2.46												HACD2	5.38	1.52
ZCCHC6	5.21	1.84												MAN2A1	5.36	2.27
EPRS	5.2	2.62												ORC3	5.34	2.59
FZD6	5.19	1.7												NOP58	5.33	3.63
HSPH1	5.18	2.18												DDX46	5.28	2.97
MLLT11	5.16	1.65												KLHL9	5.25	1.68
GOLGB1	5.13	2.02												MAPK6	5.24	2.46
AHR	5.12	2.25												ZCCHC6	5.21	1.84
MYO5A	5.11	2.16												EPRS	5.2	2.62
AKAP11	5.07	2.07												FZD6	5.19	1.7
DNAJC10	5.05	1.81												HSPH1	5.18	2.18
ASUN	5.04	1.96												MLLT11	5.16	1.65
NKTR	5.03	2.05												GOLGB1	5.13	2.02
SLK	5.01	4.32												AHR	5.12	2.25
ITGB8	4.99	2.13												MYO5A	5.11	2.16
ZDHHC20	4.96	2.05												AKAP11	5.07	2.07
RLIM	4.93	1.97												DNAJC10	5.05	1.81
SREK1	4.93	2.37												ASUN	5.04	1.96
CHD1	4.89	3.56												NKTR	5.03	2.05
DENND4C	4.87	2.4												SLK	5.01	4.32
USP1	4.85	1.66												ITGB8	4.99	2.13
MANEA	4.85	3.8												ZDHHC20	4.96	2.05
SLC39A6	4.84	1.69												RLIM	4.93	1.97
YES1	4.84	2.16												SREK1	4.93	2.37
LYSMD3	4.82	3.25												CHD1	4.89	3.56
PDS5A	4.8	2.22												DENND4C	4.87	2.4
SHPRH	4.79	3.08												USP1	4.85	1.66
ATAD2	4.77	1.83												MANEA	4.85	3.8
HECTD1	4.76	3.57												SLC39A6	4.84	1.69
ME1	4.75	1.87												YES1	4.84	2.16
LMAN1	4.75	1.94												LYSMD3	4.82	3.25
TAF2	4.73	1.52												PDS5A	4.8	2.22
RPGR	4.73	1.66												SHPRH	4.79	3.08
DHX36	4.72	2.75												ATAD2	4.77	1.83
ATP11C	4.69	1.66												HECTD1	4.76	3.57
PCM1	4.66	2.71												ME1	4.75	1.87
KIF1B	4.63	1.84												LMAN1	4.75	1.94
ARRDC3	4.62	2.45												TAF2	4.73	1.52
ZNF484	4.6	2.17												RPGR	4.73	1.66
SLC35A3	4.59	2.21												DHX36	4.72	2.75
TRIM33	4.57	3.17												ATP11C	4.69	1.66
EFCAB7; DLEU2L	4.55	1.88												PCM1	4.66	2.71
CDC5L	4.55	3.74												KIF1B	4.63	1.84
CTR9	4.53	1.76												ARRDC3	4.62	2.45
NEK7	4.47	1.66												ZNF484	4.6	2.17
SHOC2	4.45	2.09												SLC35A3	4.59	2.21
ZNF12	4.43	1.89												TRIM33	4.57	3.17
CUL2	4.43	1.91												EFCAB7	4.55	1.88
ARID4B	4.43	2.01												DLEU2L	4.55	1.88
TMEM30A	4.4	2.46												CDC5L	4.55	3.74
USO1	4.36	2.09												CTR9	4.53	1.76
CSNK1G3	4.35	1.68												NEK7	4.47	1.66
PPP1R12A	4.35	2.38												SHOC2	4.45	2.09
ZC3H12C	4.34	1.82												ZNF12	4.43	1.89
SMARCAD1	4.33	3.52												CUL2	4.43	1.91
WWC2	4.3	1.75												ARID4B	4.43	2.01
ACAP2; ACAP2-IT1; AC090018.3	4.27	2.14												TMEM30A	4.4	2.46
PIK3CA	4.26	2.75												USO1	4.36	2.09
RECQL	4.24	1.73												CSNK1G3	4.35	1.68
CSE1L	4.23	2.02												PPP1R12A	4.35	2.38
TNKS2	4.21	1.66												ZC3H12C	4.34	1.82
UBXN4	4.21	1.66												SMARCAD1	4.33	3.52
LRRC40	4.21	2.82												WWC2	4.3	1.75
MTDH	4.2	1.76												ACAP2	4.27	2.14
HELLS	4.19	2.11												ACAP2-IT1	4.27	2.14
STYX	4.18	1.6												AC090018.3	4.27	2.14
NRIP1	4.18	1.76												PIK3CA	4.26	2.75
BIRC6	4.18	2.32												RECQL	4.24	1.73
G2E3	4.17	1.73												CSE1L	4.23	2.02
USP16	4.16	3.87												TNKS2	4.21	1.66
FEM1B	4.15	1.54												UBXN4	4.21	1.66
DEK	4.15	2.75												LRRC40	4.21	2.82
BBS7	4.14	1.95												MTDH	4.2	1.76
TTC3	4.13	1.85												HELLS	4.19	2.11
AHI1	4.11	2.36												STYX	4.18	1.6
DEPDC1	4.09	1.75												NRIP1	4.18	1.76
ZNF280B	4.09	2.05												BIRC6	4.18	2.32
BRCC3	4.09	2.39												G2E3	4.17	1.73
NFAT5	4.08	1.71												USP16	4.16	3.87
LMBRD2	4.08	1.87												FEM1B	4.15	1.54
TMOD3	4.07	1.53												DEK	4.15	2.75
HIF1A	4.07	2												BBS7	4.14	1.95
SCAMP1	4.07	2.17												TTC3	4.13	1.85
ITGAV	4.07	2.69												AHI1	4.11	2.36
TAOK1; MIR4523	4.04	2.24												DEPDC1	4.09	1.75
TMTC3	4.03	2.18												ZNF280B	4.09	2.05
ACSL3	4.02	2.16												BRCC3	4.09	2.39
PHF14	4.02	2.18												NFAT5	4.08	1.71
ZFAND1	4.01	1.89												LMBRD2	4.08	1.87
METAP2	3.99	1.7												TMOD3	4.07	1.53
MAP7D3	3.98	1.89												HIF1A	4.07	2
ZMYM4	3.98	2.5												SCAMP1	4.07	2.17
KIF18A	3.97	2.27												ITGAV	4.07	2.69
CCDC88A	3.96	2.42												TAOK1	4.04	2.24
JMJD1C	3.94	3.03												MIR4523	4.04	2.24
ANXA1	3.9	1.95												TMTC3	4.03	2.18
METTL4	3.9	2.18												ACSL3	4.02	2.16
FAM208A	3.89	2.16												PHF14	4.02	2.18
TOPBP1	3.87	2.1												ZFAND1	4.01	1.89
ALMS1	3.87	2.54												METAP2	3.99	1.7
RSF1	3.86	2.07												MAP7D3	3.98	1.89
SETX	3.85	1.85												ZMYM4	3.98	2.5
SPAST	3.8	1.96												KIF18A	3.97	2.27
UBE2V2	3.79	2.04												CCDC88A	3.96	2.42
SPOPL	3.78	1.76												JMJD1C	3.94	3.03
MYSM1	3.78	2.46												ANXA1	3.9	1.95
ATAD2B	3.77	2.39												METTL4	3.9	2.18
CDC42BPA	3.77	2.58												FAM208A	3.89	2.16
NUCB2	3.77	3.07												TOPBP1	3.87	2.1
RB1	3.76	1.99												ALMS1	3.87	2.54
ZZZ3	3.76	2.17												RSF1	3.86	2.07
TOPORS	3.71	1.85												SETX	3.85	1.85
BAZ1A	3.71	2.58												SPAST	3.8	1.96
NPAT	3.7	3.7												UBE2V2	3.79	2.04
KIF14	3.69	1.61												SPOPL	3.78	1.76
IFI44	3.69	1.86												MYSM1	3.78	2.46
HAUS6	3.68	1.74												ATAD2B	3.77	2.39
TRPM7	3.67	3.62												CDC42BPA	3.77	2.58
ZNF28	3.66	2.18												NUCB2	3.77	3.07
CWC27	3.66	2.66												RB1	3.76	1.99
NLN	3.65	1.55												ZZZ3	3.76	2.17
FRS2	3.64	1.54												TOPORS	3.71	1.85
APC	3.63	2.83												BAZ1A	3.71	2.58
PIK3R1	3.62	1.76												NPAT	3.7	3.7
ATE1	3.61	1.7												KIF14	3.69	1.61
PHAX	3.61	2.97												IFI44	3.69	1.86
SIRT1	3.6	2.01												HAUS6	3.68	1.74
SCP2	3.57	1.97												TRPM7	3.67	3.62
CHD2; MIR3175	3.56	2.11												ZNF28	3.66	2.18
AGL	3.55	2.76												CWC27	3.66	2.66
SLC25A36	3.54	1.72												NLN	3.65	1.55
SMC4	3.53	2.96												FRS2	3.64	1.54
KCTD3	3.52	1.82												APC	3.63	2.83
SENP6	3.52	2.18												PIK3R1	3.62	1.76
VCPIP1	3.5	2.76												ATE1	3.61	1.7
CEP295	3.5	2.92												PHAX	3.61	2.97
SAMD9	3.5	4.17												SIRT1	3.6	2.01
DIAPH3	3.47	1.63												SCP2	3.57	1.97
CEP55	3.46	2.26												CHD2	3.56	2.11
NSRP1; MIR423	3.44	2.68												MIR3175	3.56	2.11
ROCK1	3.43	2.72												AGL	3.55	2.76
LRPPRC	3.43	3.23												SLC25A36	3.54	1.72
SUZ12	3.41	1.8												SMC4	3.53	2.96
CSDE1	3.4	1.51												KCTD3	3.52	1.82
RAD17	3.4	1.81												SENP6	3.52	2.18
ZNF594	3.39	1.63												VCPIP1	3.5	2.76
TMX1	3.39	1.64												CEP295	3.5	2.92
UBE2D1	3.39	1.95												SAMD9	3.5	4.17
MASTL	3.39	2.06												DIAPH3	3.47	1.63
ZC3H14	3.39	2.51												CEP55	3.46	2.26
RPF2	3.38	1.8												NSRP1	3.44	2.68
TNRC6A	3.38	2.04												MIR423	3.44	2.68
ALG11; UTP14C	3.35	1.89												ROCK1	3.43	2.72
COPS2	3.34	2.25												LRPPRC	3.43	3.23
CDCA2	3.32	1.62												SUZ12	3.41	1.8
PHLDB2; PLCXD2	3.32	1.81												CSDE1	3.4	1.51
BRCA1	3.32	1.9												RAD17	3.4	1.81
SACS	3.32	2.05												ZNF594	3.39	1.63
TEAD1	3.31	1.66												TMX1	3.39	1.64
RAPGEF2	3.3	1.6												UBE2D1	3.39	1.95
SECISBP2L	3.28	2.36												MASTL	3.39	2.06
MINPP1	3.27	2.03												ZC3H14	3.39	2.51
PKN2	3.27	2.36												RPF2	3.38	1.8
ARHGAP12	3.25	2.17												TNRC6A	3.38	2.04
EVI5	3.25	2.27												ALG11	3.35	1.89
CCSER2	3.25	3.52												UTP14C	3.35	1.89
EEA1	3.24	2.85												COPS2	3.34	2.25
TPP2	3.23	1.7												CDCA2	3.32	1.62
EIF5B	3.23	1.98												PHLDB2	3.32	1.81
LOC100421561	3.22	1.83												PLCXD2	3.32	1.81
NUFIP2	3.21	1.61												BRCA1	3.32	1.9
SOS2	3.21	3.46												SACS	3.32	2.05
TFPI	3.2	1.96												TEAD1	3.31	1.66
EID3	3.2	2.4												RAPGEF2	3.3	1.6
TMEM167A	3.18	2.68												SECISBP2L	3.28	2.36
PPWD1	3.17	2.57												MINPP1	3.27	2.03
MSH2	3.15	1.93												PKN2	3.27	2.36
SMARCA5	3.15	2.45												ARHGAP12	3.25	2.17
VPS13C	3.14	1.52												EVI5	3.25	2.27
CDC73	3.14	1.62												CCSER2	3.25	3.52
REST	3.13	2.06												EEA1	3.24	2.85
RABEP1	3.12	1.66												TPP2	3.23	1.7
GNA13	3.12	2.03												EIF5B	3.23	1.98
RIPK2	3.09	1.73												LOC100421561	3.22	1.83
PLGLB1	3.09	2.01												NUFIP2	3.21	1.61
TGFBR1	3.08	1.85												SOS2	3.21	3.46
GRIA4	3.07	1.67												TFPI	3.2	1.96
PIK3C2A	3.07	1.78												EID3	3.2	2.4
TMEM135	3.07	1.97												TMEM167A	3.18	2.68
PCMTD1	3.07	2.13												PPWD1	3.17	2.57
ERCC6L2	3.05	1.72												MSH2	3.15	1.93
ZNF98	3.04	2.19												SMARCA5	3.15	2.45
ZGRF1	3.04	2.44												VPS13C	3.14	1.52
MYO10	3.04	2.73												CDC73	3.14	1.62
MBD4	3.03	1.6												REST	3.13	2.06
NBN	3.03	3.01												RABEP1	3.12	1.66
SMC2	3.02	1.53												GNA13	3.12	2.03
SOS1	3.02	1.87												RIPK2	3.09	1.73
EIF2AK3	3.02	2.13												PLGLB1	3.09	2.01
BAG2	3.01	1.52												TGFBR1	3.08	1.85
SMCHD1	3.01	2.07												GRIA4	3.07	1.67
PPP2R5E	3	1.92												PIK3C2A	3.07	1.78
ANP32E	3	1.97												TMEM135	3.07	1.97
PNPLA8	3	2.45												PCMTD1	3.07	2.13
MINA	2.99	1.91												ERCC6L2	3.05	1.72
ROCK2	2.99	3.34												ZNF98	3.04	2.19
AP3B1	2.98	1.86												ZGRF1	3.04	2.44
UBLCP1	2.98	2.41												MYO10	3.04	2.73
FAM171B	2.98	3												MBD4	3.03	1.6
SLAIN2	2.97	1.67												NBN	3.03	3.01
ZNF138	2.97	1.71												SMC2	3.02	1.53
PSMA3	2.97	1.89												SOS1	3.02	1.87
RAB11FIP2	2.96	3.05												EIF2AK3	3.02	2.13
LCA5	2.94	1.6												BAG2	3.01	1.52
CFAP97	2.94	1.89												SMCHD1	3.01	2.07
EFR3A	2.94	2.01												PPP2R5E	3	1.92
LARP7	2.94	2.53												ANP32E	3	1.97
HIBCH	2.92	1.5												PNPLA8	3	2.45
IMPA1	2.92	1.51												MINA	2.99	1.91
NSA2	2.92	1.52												ROCK2	2.99	3.34
DNAJC2	2.92	2.75												AP3B1	2.98	1.86
GOLIM4	2.91	1.98												UBLCP1	2.98	2.41
KIAA1524	2.91	2.25												FAM171B	2.98	3
DNAJC3	2.91	3.11												SLAIN2	2.97	1.67
EIF2AK2	2.9	1.59												ZNF138	2.97	1.71
IPO8	2.9	1.59												PSMA3	2.97	1.89
PSMC6	2.9	1.82												RAB11FIP2	2.96	3.05
SUV39H2	2.9	1.83												LCA5	2.94	1.6
ARFGEF2	2.88	1.91												CFAP97	2.94	1.89
BIVM-ERCC5	2.88	2.14												EFR3A	2.94	2.01
C10orf12	2.87	2.59												LARP7	2.94	2.53
ZFYVE16	2.86	2.18												HIBCH	2.92	1.5
HLTF	2.86	4.06												IMPA1	2.92	1.51
CGGBP1	2.85	1.69												NSA2	2.92	1.52
C6orf62	2.83	1.53												DNAJC2	2.92	2.75
AFTPH	2.82	2.02												GOLIM4	2.91	1.98
FBXO5	2.81	1.71												KIAA1524	2.91	2.25
HIVEP2	2.8	1.83												DNAJC3	2.91	3.11
ERBB2IP	2.8	2.29												EIF2AK2	2.9	1.59
CLSPN	2.8	2.33												IPO8	2.9	1.59
UFL1	2.8	2.43												PSMC6	2.9	1.82
SEC24D	2.79	1.53												SUV39H2	2.9	1.83
IPMK	2.79	1.58												ARFGEF2	2.88	1.91
ZHX1	2.79	2.11												BIVM-ERCC5	2.88	2.14
GPATCH11	2.78	1.97												C10orf12	2.87	2.59
KTN1	2.78	2.79												ZFYVE16	2.86	2.18
RB1CC1	2.78	4.19												HLTF	2.86	4.06
TMF1	2.77	1.69												CGGBP1	2.85	1.69
ZNF800	2.77	2.41												C6orf62	2.83	1.53
CCP110	2.77	2.69												AFTPH	2.82	2.02
RDX	2.76	1.57												FBXO5	2.81	1.71
ATP13A3	2.76	1.59												HIVEP2	2.8	1.83
FAM91A1	2.76	1.8												ERBB2IP	2.8	2.29
MTR	2.76	1.98												CLSPN	2.8	2.33
CEBPZ	2.75	2.24												UFL1	2.8	2.43
ABCA5	2.75	2.82												SEC24D	2.79	1.53
MKI67	2.74	1.57												IPMK	2.79	1.58
ZNF254	2.74	1.63												ZHX1	2.79	2.11
CASC5	2.74	2.47												GPATCH11	2.78	1.97
KIAA1143	2.73	1.59												KTN1	2.78	2.79
RPAP3	2.73	2.73												RB1CC1	2.78	4.19
PIBF1	2.71	1.95												TMF1	2.77	1.69
QKI	2.7	1.78												ZNF800	2.77	2.41
PSMD14	2.69	1.76												CCP110	2.77	2.69
REV3L	2.69	2.77												RDX	2.76	1.57
HIPK2	2.67	1.86												ATP13A3	2.76	1.59
NAP1L1	2.67	1.91												FAM91A1	2.76	1.8
C18orf54	2.67	2.23												MTR	2.76	1.98
FAM13B	2.66	1.5												CEBPZ	2.75	2.24
ZNF189	2.66	1.68												ABCA5	2.75	2.82
MAP3K7	2.66	1.71												MKI67	2.74	1.57
ZFAND5	2.66	2.05												ZNF254	2.74	1.63
USP33	2.65	1.73												CASC5	2.74	2.47
SMC5	2.65	2.5												KIAA1143	2.73	1.59
CENPK	2.63	2.2												RPAP3	2.73	2.73
BLM	2.63	2.21												PIBF1	2.71	1.95
GLS	2.63	2.52												QKI	2.7	1.78
C1GALT1	2.61	2.46												PSMD14	2.69	1.76
DIS3	2.6	1.89												REV3L	2.69	2.77
SUB1	2.6	2.11												HIPK2	2.67	1.86
IDE	2.6	2.3												NAP1L1	2.67	1.91
UTRN	2.59	1.87												C18orf54	2.67	2.23
SKIL	2.59	2.67												FAM13B	2.66	1.5
LMBRD1	2.58	1.72												ZNF189	2.66	1.68
ATF1	2.58	2.08												MAP3K7	2.66	1.71
CENPU	2.57	2.13												ZFAND5	2.66	2.05
C5orf42	2.57	2.17												USP33	2.65	1.73
CUL3	2.57	2.21												SMC5	2.65	2.5
NPIPB5	2.56	1.54												CENPK	2.63	2.2
EIF1AX	2.55	1.52												BLM	2.63	2.21
SSX2IP	2.55	1.69												GLS	2.63	2.52
FAM3C	2.54	2.16												C1GALT1	2.61	2.46
CCNE2	2.52	1.69												DIS3	2.6	1.89
WDHD1	2.52	1.87												SUB1	2.6	2.11
MSI2	2.51	1.59												IDE	2.6	2.3
KRR1	2.51	1.77												UTRN	2.59	1.87
TCERG1	2.51	2.54												SKIL	2.59	2.67
SLMAP	2.5	1.54												LMBRD1	2.58	1.72
GUF1	2.5	1.95												ATF1	2.58	2.08
ZNF92	2.5	4.02												CENPU	2.57	2.13
ITGB3BP	2.49	1.52												C5orf42	2.57	2.17
PRPF39	2.49	2.5												CUL3	2.57	2.21
BCCIP	2.48	1.58												NPIPB5	2.56	1.54
XRCC4	2.48	1.64												EIF1AX	2.55	1.52
CUL5	2.48	2.63												SSX2IP	2.55	1.69
SOCS6	2.47	1.53												FAM3C	2.54	2.16
ZNF91	2.47	1.69												CCNE2	2.52	1.69
CASP8AP2	2.47	1.73												WDHD1	2.52	1.87
PHF20L1	2.47	1.81												MSI2	2.51	1.59
EXT1; spawla	2.47	2.39												KRR1	2.51	1.77
PTBP2	2.46	1.81												TCERG1	2.51	2.54
NRP1	2.46	1.83												SLMAP	2.5	1.54
MBIP	2.46	2.5												GUF1	2.5	1.95
MPHOSPH10	2.45	1.58												ZNF92	2.5	4.02
WASL	2.45	1.62												ITGB3BP	2.49	1.52
SEL1L	2.45	1.74												PRPF39	2.49	2.5
TMED5	2.45	1.82												BCCIP	2.48	1.58
CAB39	2.45	2.41												XRCC4	2.48	1.64
AEBP2	2.44	1.68												CUL5	2.48	2.63
RBBP8; MIR4741	2.44	2.08												SOCS6	2.47	1.53
CCNJ	2.43	1.78												ZNF91	2.47	1.69
ATP1B1	2.43	2.78												CASP8AP2	2.47	1.73
EHBP1	2.42	1.92												PHF20L1	2.47	1.81
BAZ2B	2.42	2.36												EXT1	2.47	2.39
ZNF354A	2.41	1.73												PTBP2	2.46	1.81
SMG1	2.41	1.75												NRP1	2.46	1.83
RGPD6; RGPD5	2.41	1.96												MBIP	2.46	2.5
RFC3	2.4	1.62												MPHOSPH10	2.45	1.58
CLEC2B	2.4	2.35												WASL	2.45	1.62
ALG6	2.4	3.83												SEL1L	2.45	1.74
KRAS	2.39	1.56												TMED5	2.45	1.82
GBP2	2.39	1.82												CAB39	2.45	2.41
MAGEA10-MAGEA5; RP11-1007I13.4	2.38	1.57												AEBP2	2.44	1.68
TRMT10C	2.38	1.86												RBBP8	2.44	2.08
VPS8	2.37	1.78												MIR4741	2.44	2.08
ZNF100	2.37	1.85												CCNJ	2.43	1.78
POLA1	2.36	1.55												ATP1B1	2.43	2.78
ST3GAL6	2.36	1.65												EHBP1	2.42	1.92
OSGIN2	2.36	2.58												BAZ2B	2.42	2.36
FRYL	2.35	1.77												ZNF354A	2.41	1.73
RBBP6	2.35	2.87												SMG1	2.41	1.75
NUDCD1	2.35	2.91												RGPD6	2.41	1.96
GVQW2	2.34	1.75												RGPD5	2.41	1.96
FCHO2	2.34	2.62												RFC3	2.4	1.62
DOPEY1	2.34	2.73												CLEC2B	2.4	2.35
CCDC82	2.34	3.32												ALG6	2.4	3.83
RIF1	2.34	3.63												KRAS	2.39	1.56
GTF2A1	2.33	1.62												GBP2	2.39	1.82
LOC643802	2.33	2.24												MAGEA10-MAGEA5	2.38	1.57
PAPD4	2.32	1.61												RP11-1007I13.4	2.38	1.57
SPCS3	2.32	1.68												TRMT10C	2.38	1.86
GNPDA2	2.32	1.92												VPS8	2.37	1.78
ZNF200	2.31	1.84												ZNF100	2.37	1.85
SPG20	2.31	2.24												POLA1	2.36	1.55
USP12	2.3	1.5												ST3GAL6	2.36	1.65
ZNF107; MIR6839	2.3	2.2												OSGIN2	2.36	2.58
ZBTB26	2.29	1.85												FRYL	2.35	1.77
LIN54	2.29	1.91												RBBP6	2.35	2.87
CCDC91	2.28	1.62												NUDCD1	2.35	2.91
CENPJ	2.28	1.8												GVQW2	2.34	1.75
ATP6V1C1	2.26	1.62												FCHO2	2.34	2.62
SAMD9L	2.26	2.98												DOPEY1	2.34	2.73
FAM111B	2.26	4.9												CCDC82	2.34	3.32
SDHAF2	2.25	1.61												RIF1	2.34	3.63
ZNF823	2.25	1.63												GTF2A1	2.33	1.62
UBR1	2.25	1.71												LOC643802	2.33	2.24
WWP1	2.25	1.96												PAPD4	2.32	1.61
CCNT2	2.24	1.54												SPCS3	2.32	1.68
RBBP9	2.24	1.6												GNPDA2	2.32	1.92
CD2AP	2.24	2.45												ZNF200	2.31	1.84
IL13RA1	2.23	1.61												SPG20	2.31	2.24
EIF2S2	2.23	1.73												USP12	2.3	1.5
CEP78	2.23	1.79												ZNF107	2.3	2.2
THAP5	2.23	2.25												MIR6839	2.3	2.2
KIF21A	2.22	3.01												ZBTB26	2.29	1.85
C1orf27	2.21	1.65												LIN54	2.29	1.91
LARGE	2.2	1.76												CCDC91	2.28	1.62
PDE4D	2.2	2.52												CENPJ	2.28	1.8
ZMYM2	2.19	1.79												ATP6V1C1	2.26	1.62
HNRNPDL	2.19	1.89												SAMD9L	2.26	2.98
EPC2	2.19	2.05												FAM111B	2.26	4.9
WNK1	2.19	2.64												SDHAF2	2.25	1.61
NBPF20	2.18	1.56												ZNF823	2.25	1.63
ZNF638	2.18	1.66												UBR1	2.25	1.71
ZBTB21	2.18	1.91												WWP1	2.25	1.96
CCDC181	2.17	1.57												CCNT2	2.24	1.54
AGGF1	2.17	1.58												RBBP9	2.24	1.6
CBWD1	2.17	2.04												CD2AP	2.24	2.45
C7orf60	2.15	1.85												IL13RA1	2.23	1.61
CREBZF	2.15	1.93												EIF2S2	2.23	1.73
CEP57	2.14	1.84												CEP78	2.23	1.79
PDLIM5	2.14	1.86												THAP5	2.23	2.25
VPS54	2.13	1.67												KIF21A	2.22	3.01
MYNN	2.13	1.72												C1orf27	2.21	1.65
GBP3	2.13	4.23												LARGE	2.2	1.76
IKBIP	2.12	1.69												PDE4D	2.2	2.52
MAP4K5	2.12	1.77												ZMYM2	2.19	1.79
ZNF302	2.12	2												HNRNPDL	2.19	1.89
UCHL3	2.11	1.7												EPC2	2.19	2.05
PRMT3	2.11	1.85												WNK1	2.19	2.64
TRIM5	2.11	1.88												NBPF20	2.18	1.56
NUF2	2.1	2.19												ZNF638	2.18	1.66
ZNF85	2.09	1.51												ZBTB21	2.18	1.91
PPIL4	2.09	1.74												CCDC181	2.17	1.57
SYDE2	2.08	1.64												AGGF1	2.17	1.58
C14orf166	2.08	1.8												CBWD1	2.17	2.04
KIF15	2.08	2.37												C7orf60	2.15	1.85
TIAM1	2.07	1.68												CREBZF	2.15	1.93
FEM1C	2.07	2.47												CEP57	2.14	1.84
TANK	2.04	1.73												PDLIM5	2.14	1.86
MAP4K3	2.03	1.56												VPS54	2.13	1.67
SIKE1	2.03	1.62												MYNN	2.13	1.72
UGDH	2.02	1.94												GBP3	2.13	4.23
ELF2	2.01	1.65												IKBIP	2.12	1.69
VPS37A	2.01	1.66												MAP4K5	2.12	1.77
PLEKHA1	2	1.58												ZNF302	2.12	2
CDC27	2	1.73												UCHL3	2.11	1.7
ANKRD36C	1.99	2.15												PRMT3	2.11	1.85
RBL1	1.98	1.59												TRIM5	2.11	1.88
TMEM41B	1.96	1.64												NUF2	2.1	2.19
TAS2R31	1.94	1.8												ZNF85	2.09	1.51
FAM3C2	1.94	1.88												PPIL4	2.09	1.74
CLMP	1.94	2.14												SYDE2	2.08	1.64
RSBN1L	1.94	2.49												C14orf166	2.08	1.8
BRAF	1.93	1.62												KIF15	2.08	2.37
FNBP4	1.92	1.57												TIAM1	2.07	1.68
LIN9	1.92	1.72												FEM1C	2.07	2.47
RFK	1.92	1.77												TANK	2.04	1.73
SETD2	1.92	1.81												MAP4K3	2.03	1.56
ZNF354B	1.92	1.82												SIKE1	2.03	1.62
ARHGAP11B	1.91	1.57												UGDH	2.02	1.94
NAA50	1.91	1.57												ELF2	2.01	1.65
ABHD17B	1.91	1.64												VPS37A	2.01	1.66
CARD16	1.91	1.86												PLEKHA1	2	1.58
CENPQ	1.91	1.9												CDC27	2	1.73
BRIP1	1.91	2.15												ANKRD36C	1.99	2.15
UCHL5	1.91	2.3												RBL1	1.98	1.59
TBC1D3P1-DHX40P1	1.9	1.58												TMEM41B	1.96	1.64
ARHGEF26	1.9	2.01												TAS2R31	1.94	1.8
TERF1	1.9	2.94												FAM3C2	1.94	1.88
LRP6	1.89	1.69												CLMP	1.94	2.14
GPR75	1.88	1.66												RSBN1L	1.94	2.49
ZNF33A	1.87	1.75												BRAF	1.93	1.62
GCC2	1.87	1.99												FNBP4	1.92	1.57
C12orf29	1.86	1.55												LIN9	1.92	1.72
DMXL1	1.86	1.66												RFK	1.92	1.77
ZNF585A	1.85	1.67												SETD2	1.92	1.81
MEI1	1.85	1.68												ZNF354B	1.92	1.82
MLLT3	1.85	2.76												ARHGAP11B	1.91	1.57
NFXL1	1.83	1.54												NAA50	1.91	1.57
NUDT12	1.83	1.69												ABHD17B	1.91	1.64
ZNF720	1.82	1.59												CARD16	1.91	1.86
ZNF780A	1.82	1.89												CENPQ	1.91	1.9
UBE2K	1.81	1.69												BRIP1	1.91	2.15
TMEM2	1.81	1.98												UCHL5	1.91	2.3
PLAC8	1.81	2.09												TBC1D3P1-DHX40P1	1.9	1.58
TOP1	1.81	3.55												ARHGEF26	1.9	2.01
TAS2R14	1.8	1.86												TERF1	1.9	2.94
ZNF780B	1.8	2.18												LRP6	1.89	1.69
ARL5B	1.79	1.72												GPR75	1.88	1.66
KLF5	1.79	1.73												ZNF33A	1.87	1.75
ZNF14	1.79	1.92												GCC2	1.87	1.99
ALDH1A3	1.79	2.07												C12orf29	1.86	1.55
PPM1B	1.79	2.18												DMXL1	1.86	1.66
PNISR	1.79	4.53												ZNF585A	1.85	1.67
CTAGE5	1.78	1.73												MEI1	1.85	1.68
KIAA1033	1.78	2.73												MLLT3	1.85	2.76
PRDM1	1.77	2.07												NFXL1	1.83	1.54
PTK2	1.76	1.54												NUDT12	1.83	1.69
USP34	1.76	1.87												ZNF720	1.82	1.59
RNMT	1.73	1.7												ZNF780A	1.82	1.89
MIS18BP1	1.72	2.27												UBE2K	1.81	1.69
SECTM1	1.72	2.43												TMEM2	1.81	1.98
CTNND1	1.71	1.61												PLAC8	1.81	2.09
ATR	1.71	2												TOP1	1.81	3.55
CCDC186; MIR2110	1.71	3.33												TAS2R14	1.8	1.86
RIOK1	1.7	1.96												ZNF780B	1.8	2.18
CRLF3	1.69	1.58												ARL5B	1.79	1.72
IFIH1	1.69	1.64												KLF5	1.79	1.73
ATP2A2	1.69	1.7												ZNF14	1.79	1.92
HECA	1.69	1.94												ALDH1A3	1.79	2.07
WDR89	1.67	2.03												PPM1B	1.79	2.18
SAT1	1.66	1.81												PNISR	1.79	4.53
CD24	1.66	1.92												CTAGE5	1.78	1.73
ARL5A	1.64	1.68												KIAA1033	1.78	2.73
SCD	1.64	1.88												PRDM1	1.77	2.07
NUDT6	1.63	1.9												PTK2	1.76	1.54
YWHAG	1.6	2.09												USP34	1.76	1.87
CCDC88C	-1.63	-1.53												RNMT	1.73	1.7
DNAJC30	-1.64	-2.04												MIS18BP1	1.72	2.27
ANKRD27	-1.64	-1.61												SECTM1	1.72	2.43
LRRC8A	-1.64	-1.55												CTNND1	1.71	1.61
PRDX4	-1.64	-1.51												ATR	1.71	2
GORASP1	-1.65	-1.62												CCDC186	1.71	3.33
RABIF	-1.65	-1.61												MIR2110	1.71	3.33
DNAJB1	-1.66	-1.81												RIOK1	1.7	1.96
CNN2	-1.67	-1.72												CRLF3	1.69	1.58
MED29	-1.67	-1.62												IFIH1	1.69	1.64
JUN	-1.67	-1.6												ATP2A2	1.69	1.7
TXLNA	-1.67	-1.59												HECA	1.69	1.94
SRC	-1.68	-1.52												WDR89	1.67	2.03
JUNB	-1.69	-1.69												SAT1	1.66	1.81
LYPD1	-1.7	-3.02												CD24	1.66	1.92
TMEM216	-1.71	-1.51												ARL5A	1.64	1.68
HS1BP3	-1.73	-1.59												SCD	1.64	1.88
DVL1; MIR6808	-1.74	-1.82												NUDT6	1.63	1.9
ELFN1	-1.74	-1.51												YWHAG	1.6	2.09
PDCD11	-1.75	-1.73												CCDC88C	-1.63	-1.53
NF2	-1.75	-1.69												DNAJC30	-1.64	-2.04
TIMM44	-1.75	-1.6												ANKRD27	-1.64	-1.61
POLR2I	-1.75	-1.52												LRRC8A	-1.64	-1.55
IPO4	-1.75	-1.51												PRDX4	-1.64	-1.51
DPP7	-1.76	-1.73												GORASP1	-1.65	-1.62
SLC37A4	-1.76	-1.7												RABIF	-1.65	-1.61
CSTF2	-1.79	-1.76												DNAJB1	-1.66	-1.81
PRADC1	-1.79	-1.73												CNN2	-1.67	-1.72
TMEM223	-1.79	-1.61												MED29	-1.67	-1.62
FMN1	-1.8	-1.88												JUN	-1.67	-1.6
KRTAP4-4	-1.81	-1.77												TXLNA	-1.67	-1.59
FOXD1	-1.81	-1.76												SRC	-1.68	-1.52
EXOC7	-1.83	-1.76												JUNB	-1.69	-1.69
LRWD1; MIR4467; MIR5090	-1.83	-1.67												LYPD1	-1.7	-3.02
MAPK7	-1.83	-1.59												TMEM216	-1.71	-1.51
RBM23	-1.83	-1.57												HS1BP3	-1.73	-1.59
RING1	-1.85	-2.16												DVL1	-1.74	-1.82
NLRX1	-1.85	-1.96												MIR6808	-1.74	-1.82
FBL	-1.85	-1.58												ELFN1	-1.74	-1.51
ALDH16A1	-1.86	-1.98												PDCD11	-1.75	-1.73
CTDSPL	-1.86	-1.6												NF2	-1.75	-1.69
ACADVL	-1.86	-1.59												TIMM44	-1.75	-1.6
CYB561A3	-1.87	-2.21												POLR2I	-1.75	-1.52
NRF1	-1.87	-1.74												IPO4	-1.75	-1.51
RFNG	-1.87	-1.72												DPP7	-1.76	-1.73
ZNF185	-1.87	-1.65												SLC37A4	-1.76	-1.7
IAH1	-1.88	-1.58												CSTF2	-1.79	-1.76
DBNL; MIR6837	-1.88	-1.5												PRADC1	-1.79	-1.73
HIST1H4J	-1.88	-1.5												TMEM223	-1.79	-1.61
TMEM61	-1.89	-1.72												FMN1	-1.8	-1.88
B4GALT7	-1.89	-1.58												KRTAP4-4	-1.81	-1.77
SNX33	-1.89	-1.53												FOXD1	-1.81	-1.76
RHOC	-1.9	-1.66												EXOC7	-1.83	-1.76
CKS2	-1.91	-1.62												LRWD1	-1.83	-1.67
NLE1	-1.91	-1.55												MIR4467	-1.83	-1.67
IL2	-1.92	-1.97												MIR5090	-1.83	-1.67
KIFC1	-1.92	-1.88												MAPK7	-1.83	-1.59
SLC25A10	-1.92	-1.62												RBM23	-1.83	-1.57
TMEM55B	-1.92	-1.58												RING1	-1.85	-2.16
PLLP	-1.92	-1.55												NLRX1	-1.85	-1.96
NNMT	-1.93	-2.14												FBL	-1.85	-1.58
LAMB3; MIR4260	-1.94	-2.19												ALDH16A1	-1.86	-1.98
PBX2	-1.95	-2.05												CTDSPL	-1.86	-1.6
ASF1B	-1.95	-1.63												ACADVL	-1.86	-1.59
TMEM159	-1.95	-1.5												CYB561A3	-1.87	-2.21
DAP	-1.96	-1.58												NRF1	-1.87	-1.74
RAP1GAP2	-1.96	-1.57												RFNG	-1.87	-1.72
CIAO1	-1.97	-1.59												ZNF185	-1.87	-1.65
GART	-1.97	-1.59												IAH1	-1.88	-1.58
DMAP1	-1.97	-1.55												DBNL	-1.88	-1.5
FAHD2A	-1.98	-1.69												MIR6837	-1.88	-1.5
PTRF	-1.99	-1.63												HIST1H4J	-1.88	-1.5
GTF3C5	-2.01	-1.66												TMEM61	-1.89	-1.72
GPN2	-2.02	-2.61												B4GALT7	-1.89	-1.58
CDCA8	-2.02	-1.7												SNX33	-1.89	-1.53
ARHGEF18	-2.02	-1.66												RHOC	-1.9	-1.66
PQLC1	-2.03	-1.62												CKS2	-1.91	-1.62
SMG9	-2.03	-1.61												NLE1	-1.91	-1.55
GSTZ1	-2.04	-1.77												IL2	-1.92	-1.97
ATG16L1	-2.04	-1.72												KIFC1	-1.92	-1.88
AURKAIP1	-2.05	-1.54												SLC25A10	-1.92	-1.62
INO80C	-2.05	-1.51												TMEM55B	-1.92	-1.58
PDLIM2	-2.06	-1.94												PLLP	-1.92	-1.55
TBC1D2	-2.07	-2.32												NNMT	-1.93	-2.14
COL1A2	-2.07	-1.83												LAMB3	-1.94	-2.19
DMKN	-2.08	-1.88												MIR4260	-1.94	-2.19
SPARCL1	-2.08	-1.74												PBX2	-1.95	-2.05
DEF8	-2.08	-1.51												ASF1B	-1.95	-1.63
MED16	-2.09	-1.99												TMEM159	-1.95	-1.5
LSM2	-2.1	-1.73												DAP	-1.96	-1.58
SURF2	-2.1	-1.51												RAP1GAP2	-1.96	-1.57
TRIM28	-2.11	-1.57												CIAO1	-1.97	-1.59
ILVBL	-2.11	-1.54												GART	-1.97	-1.59
PYGB	-2.12	-1.78												DMAP1	-1.97	-1.55
EIF3F	-2.12	-1.71												FAHD2A	-1.98	-1.69
TNPO2	-2.12	-1.66												PTRF	-1.99	-1.63
FSTL3	-2.13	-1.88												GTF3C5	-2.01	-1.66
VPS18	-2.13	-1.68												GPN2	-2.02	-2.61
TEAD4	-2.14	-1.86												CDCA8	-2.02	-1.7
TSSC4	-2.14	-1.8												ARHGEF18	-2.02	-1.66
UNC93B1	-2.14	-1.73												PQLC1	-2.03	-1.62
ST3GAL4	-2.15	-1.55												SMG9	-2.03	-1.61
PLEC	-2.15	-1.53												GSTZ1	-2.04	-1.77
ARL16	-2.16	-1.63												ATG16L1	-2.04	-1.72
C11orf98; LBHD1	-2.16	-1.63												AURKAIP1	-2.05	-1.54
TRNP1	-2.17	-1.74												INO80C	-2.05	-1.51
C10orf55	-2.17	-1.6												PDLIM2	-2.06	-1.94
ERF	-2.18	-1.91												TBC1D2	-2.07	-2.32
ASB1	-2.18	-1.72												COL1A2	-2.07	-1.83
GGA1	-2.18	-1.54												DMKN	-2.08	-1.88
TSTA3	-2.18	-1.5												SPARCL1	-2.08	-1.74
HEXA	-2.19	-1.51												DEF8	-2.08	-1.51
TRAPPC4	-2.2	-1.51												MED16	-2.09	-1.99
GSTO1	-2.23	-1.62												LSM2	-2.1	-1.73
HK1	-2.23	-1.53												SURF2	-2.1	-1.51
SMARCD1	-2.25	-1.64												TRIM28	-2.11	-1.57
ARFIP2	-2.25	-1.5												ILVBL	-2.11	-1.54
MRPL24	-2.26	-1.72												PYGB	-2.12	-1.78
BSPRY	-2.27	-1.64												EIF3F	-2.12	-1.71
ACTB	-2.27	-1.57												TNPO2	-2.12	-1.66
RAE1	-2.27	-1.55												FSTL3	-2.13	-1.88
RPS6KA1	-2.29	-2.19												VPS18	-2.13	-1.68
RGL2	-2.29	-1.6												TEAD4	-2.14	-1.86
PHLDA2	-2.3	-1.62												TSSC4	-2.14	-1.8
MYL9	-2.3	-1.54												UNC93B1	-2.14	-1.73
NAPRT	-2.31	-1.53												ST3GAL4	-2.15	-1.55
PMVK	-2.31	-1.52												PLEC	-2.15	-1.53
TMEM101	-2.32	-1.71												ARL16	-2.16	-1.63
PES1	-2.34	-1.53												C11orf98	-2.16	-1.63
FLOT2	-2.36	-1.9												LBHD1	-2.16	-1.63
DRG2	-2.36	-1.88												TRNP1	-2.17	-1.74
RAD51	-2.37	-1.61												C10orf55	-2.17	-1.6
PMPCA	-2.38	-1.62												ERF	-2.18	-1.91
TOM1	-2.38	-1.54												ASB1	-2.18	-1.72
ZNF574	-2.39	-2.15												GGA1	-2.18	-1.54
PWP2	-2.39	-1.67												TSTA3	-2.18	-1.5
ILK	-2.39	-1.51												HEXA	-2.19	-1.51
TRAP1	-2.4	-1.86												TRAPPC4	-2.2	-1.51
DGKD	-2.42	-1.93												GSTO1	-2.23	-1.62
SEPW1	-2.43	-2.59												HK1	-2.23	-1.53
EXOSC5	-2.43	-1.54												SMARCD1	-2.25	-1.64
CDK5RAP3	-2.43	-1.51												ARFIP2	-2.25	-1.5
CDCA3	-2.45	-1.78												MRPL24	-2.26	-1.72
ABHD11	-2.46	-1.7												BSPRY	-2.27	-1.64
UROD	-2.46	-1.5												ACTB	-2.27	-1.57
BIN3	-2.47	-1.53												RAE1	-2.27	-1.55
TBL2	-2.5	-2.08												RPS6KA1	-2.29	-2.19
TRNAU1AP	-2.52	-1.56												RGL2	-2.29	-1.6
CARHSP1	-2.53	-1.61												PHLDA2	-2.3	-1.62
BACH2	-2.55	-2.54												MYL9	-2.3	-1.54
MRPL28	-2.56	-1.75												NAPRT	-2.31	-1.53
NAA10	-2.57	-1.51												PMVK	-2.31	-1.52
EIF3G	-2.58	-1.9												TMEM101	-2.32	-1.71
MED24; MIR6884	-2.59	-2.44												PES1	-2.34	-1.53
PRMT7	-2.59	-1.98												FLOT2	-2.36	-1.9
STX10	-2.59	-1.73												DRG2	-2.36	-1.88
BORCS8; MEF2B; MEF2BNB-MEF2B	-2.59	-1.71												RAD51	-2.37	-1.61
SLC25A11	-2.59	-1.57												PMPCA	-2.38	-1.62
RAB35	-2.6	-1.85												TOM1	-2.38	-1.54
DUSP5	-2.63	-2.35												ZNF574	-2.39	-2.15
SNRPB	-2.63	-1.55												PWP2	-2.39	-1.67
ITPA	-2.64	-1.81												ILK	-2.39	-1.51
CALB2	-2.65	-1.55												TRAP1	-2.4	-1.86
IDH2	-2.66	-1.61												DGKD	-2.42	-1.93
ARHGAP23	-2.68	-1.62												SEPW1	-2.43	-2.59
RUVBL2	-2.69	-1.68												EXOSC5	-2.43	-1.54
PFAS	-2.7	-1.67												CDK5RAP3	-2.43	-1.51
TRAF4	-2.75	-1.81												CDCA3	-2.45	-1.78
ENTPD6	-2.75	-1.69												ABHD11	-2.46	-1.7
NOP10	-2.77	-1.69												UROD	-2.46	-1.5
POR; MIR4651	-2.81	-2.03												BIN3	-2.47	-1.53
BCL2L12	-2.85	-1.68												TBL2	-2.5	-2.08
CENPM	-2.85	-1.58												TRNAU1AP	-2.52	-1.56
CCDC85B	-2.86	-1.53												CARHSP1	-2.53	-1.61
RPL27	-2.86	-1.51												BACH2	-2.55	-2.54
AIP	-2.87	-1.9												MRPL28	-2.56	-1.75
CARD19	-2.92	-1.73												NAA10	-2.57	-1.51
COMMD4	-2.93	-1.59												EIF3G	-2.58	-1.9
BCAT2	-2.94	-1.78												MED24	-2.59	-2.44
HMBS	-2.98	-1.63												MIR6884	-2.59	-2.44
MPDU1	-2.98	-1.52												PRMT7	-2.59	-1.98
ATP5A1	-3.02	-1.55												STX10	-2.59	-1.73
ZNF32	-3.03	-1.65												BORCS8	-2.59	-1.71
MAD2L2	-3.03	-1.62												MEF2B	-2.59	-1.71
FAM229B	-3.06	-2.09												MEF2BNB-MEF2B	-2.59	-1.71
CNP	-3.08	-1.92												SLC25A11	-2.59	-1.57
BOLA2; BOLA2B	-3.13	-1.62												RAB35	-2.6	-1.85
CD2BP2	-3.13	-1.53												DUSP5	-2.63	-2.35
NR2C2AP	-3.15	-1.5												SNRPB	-2.63	-1.55
ERCC1	-3.2	-1.65												ITPA	-2.64	-1.81
ANKRD54; MIR658	-3.22	-1.5												CALB2	-2.65	-1.55
S100A13	-3.29	-1.68												IDH2	-2.66	-1.61
ARMC6	-3.48	-1.67												ARHGAP23	-2.68	-1.62
GINS2	-3.52	-1.61												RUVBL2	-2.69	-1.68
RANGRF	-3.63	-1.61												PFAS	-2.7	-1.67
POLR2G	-3.8	-1.65												TRAF4	-2.75	-1.81
UNG	-3.82	-2												ENTPD6	-2.75	-1.69
AP1S1	-4.01	-1.67												NOP10	-2.77	-1.69
SDC1	-4.13	-1.87												POR	-2.81	-2.03
BAD	-4.51	-2.22												MIR4651	-2.81	-2.03
HIST1H1D	-5.39	-1.77												BCL2L12	-2.85	-1.68
CIB1	-5.45	-1.73												CENPM	-2.85	-1.58
HIST1H2AB	-5.88	-1.51												CCDC85B	-2.86	-1.53
														RPL27	-2.86	-1.51
														AIP	-2.87	-1.9
														CARD19	-2.92	-1.73
														COMMD4	-2.93	-1.59
														BCAT2	-2.94	-1.78
														HMBS	-2.98	-1.63
														MPDU1	-2.98	-1.52
														ATP5A1	-3.02	-1.55
														ZNF32	-3.03	-1.65
														MAD2L2	-3.03	-1.62
														FAM229B	-3.06	-2.09
														CNP	-3.08	-1.92
														BOLA2	-3.13	-1.62
														BOLA2B	-3.13	-1.62
														CD2BP2	-3.13	-1.53
														NR2C2AP	-3.15	-1.5
														ERCC1	-3.2	-1.65
														ANKRD54	-3.22	-1.5
														MIR658	-3.22	-1.5
														S100A13	-3.29	-1.68
														ARMC6	-3.48	-1.67
														GINS2	-3.52	-1.61
														RANGRF	-3.63	-1.61
														POLR2G	-3.8	-1.65
														UNG	-3.82	-2
														AP1S1	-4.01	-1.67
														SDC1	-4.13	-1.87
														BAD	-4.51	-2.22
														HIST1H1D	-5.39	-1.77
														CIB1	-5.45	-1.73
														HIST1H2AB	-5.88	-1.51
