# Supplementary material for: Effects of Anticancer Agent P-bi-TAT on Gene Expression Link the Integrin Thyroid Hormone Receptor to Expression of Stemness and Energy Metabolism Genes in Cancer Cells
Source: Preprints.org preprint supplement (doi:10.20944/preprints202203.0125.v1), 2022-03-09
Supplement: Supplementary file 3 [file Supplemental Table S2. 34 Glioma survival genes.xlsx]

## Sheet: 34full
ID	treated Avg (log2)	untreated Avg (log2)	treated Standard Deviation	untreated Standard Deviation	Fold Change	P-val	Public Gene IDs	Gene Symbol	Description	EnsemblIDs	Symbols	Cancer		Glioma cancer prognosis		Glioma prognostic genes
TC0900011453.hg.1	6.5	3.81	0.28	0.74	6.42	4.84e-05	NM_006626; ENST00000373659; BC037282; OTTHUMT00000053962	ZBTB6	zinc finger and BTB domain containing 6	ENSG00000186130	ZBTB6	Glioma,Renal cancer		favorable
TC0100008815.hg.1	5.53	3.25	0.52	0.1	4.86	6.19e-05	NM_006820; ENST00000370751; ENST00000450498; ENST00000452835; ENST00000459784; ENST00000462041; ENST00000474002; ENST00000476521; ENST00000476876; ENST00000486882; ENST00000494910; BC015932; OTTHUMT00000026834; OTTHUMT00000026835; OTTHUMT00000026836; OTTHUMT00000026837; OTTHUMT00000026838; OTTHUMT00000026839; OTTHUMT00000026840; OTTHUMT00000026841; OTTHUMT00000096291; OTTHUMT00000324180; uc010oro…	IFI44L	interferon-induced protein 44-like	ENSG00000137959	IFI44L	Glioma,Renal cancer,Endometrial cancer		favorable
TC0600011162.hg.1	8.64	6.43	0.02	0.84	4.62	0.0003	NM_001242797; NM_001242798; NM_001242799; NM_024639; ENST00000415922; ENST00000456172; ENST00000461899; ENST00000465674; ENST00000471278; ENST00000480036; ENST00000607204; ENST00000622479; BC050425; BC119669; OTTHUMT00000040126; OTTHUMT00000040127; OTTHUMT00000356219; OTTHUMT00000356220; OTTHUMT00000356221; uc003nil.4	ZNF322	zinc finger protein 322	ENSG00000181315	ZNF322	Glioma,Lung cancer		favorable
TC0200007533.hg.1	7.75	5.72	0.18	0.45	4.08	0.0001	NM_002158; ENST00000340553; ENST00000413569; ENST00000616844; BC063305; OTTHUMT00000251240; OTTHUMT00000323786	FOXN2	forkhead box N2	ENSG00000170802	FOXN2	Glioma,Renal cancer		favorable
TC0100008641.hg.1	8.97	7.1	0.08	0.29	3.65	0.0001	NM_001077700; NM_001077701; NM_001077702; NM_001077703; NM_001077704; NM_001146110; NM_001146111; NM_001146112; NM_001146113; NM_001278215; NM_020948; ENST00000355356; ENST00000355977; ENST00000357692; ENST00000371012; ENST00000371014; ENST00000371016; ENST00000371018; ENST00000401041; ENST00000401042; ENST00000479067; ENST00000493357; BC108726; BC125217; BC125218; OTTHUMT00000025490; OTTHUMT0000…	MIER1	mesoderm induction early response 1, transcriptional regulator	ENSG00000198160	MIER1	Colorectal cancer,Glioma		favorable
TC0300013215.hg.1	9.52	7.66	0.24	0.38	3.63	0.0002	NM_024665; ENST00000352800; ENST00000413084; ENST00000422066; ENST00000422442; ENST00000424913; ENST00000427349; ENST00000428970; ENST00000430069; ENST00000431421; ENST00000431674; ENST00000437738; ENST00000443315; ENST00000450267; ENST00000457928; ENST00000474363; ENST00000491623; ENST00000626672; ENST00000626758; ENST00000627825; ENST00000630796; ENST00000630833; ENST00000631253; BC113421; OTTH…	TBL1XR1	transducin (beta)-like 1 X-linked receptor 1	ENSG00000177565	TBL1XR1	Liver cancer,Glioma,Renal cancer		favorable
TC1000010239.hg.1	7.67	5.97	0.07	0.22	3.25	0.0002	NM_001270695; NM_001270696; NM_001270697; NM_001270698; NM_001270699; NM_018287; ENST00000311380; ENST00000344936; ENST00000375245; ENST00000375250; ENST00000396144; ENST00000454919; ENST00000492028; ENST00000493008; ENST00000497085; ENST00000497103; BC094719; BC115362; BC115363; OTTHUMT00000047457; OTTHUMT00000047458; OTTHUMT00000047459; OTTHUMT00000047460; OTTHUMT00000047461; OTTHUMT00000047462…	ARHGAP12	Rho GTPase activating protein 12	ENSG00000165322	ARHGAP12	Glioma,Renal cancer		favorable
TC1900007456.hg.1	9.49	7.89	0.4	0.81	3.03	0.0032	NM_021047; ENST00000355650; ENST00000589668; ENST00000589717; ENST00000592725; BC065572; BC125063; BC125064; OTTHUMT00000460801; OTTHUMT00000460802; OTTHUMT00000460803; OTTHUMT00000460805	ZNF253	zinc finger protein 253	ENSG00000256771	ZNF253	Glioma,Renal cancer,Ovarian cancer		favorable
TC0200010252.hg.1	9.4	7.89	0.11	0.31	2.85	0.0007	NM_019048; ENST00000260952; ENST00000420250; ENST00000425590; ENST00000605941; ENST00000606910; ENST00000607062; ENST00000607535; ENST00000607690; ENST00000607829; BC001243; OTTHUMT00000255919; OTTHUMT00000335036; OTTHUMT00000335037; OTTHUMT00000380910; OTTHUMT00000470914; OTTHUMT00000470915; OTTHUMT00000470916; OTTHUMT00000470917; OTTHUMT00000470918	ASNSD1	asparagine synthetase domain containing 1	ENSG00000138381	ASNSD1	Liver cancer,Glioma		favorable
TC0200010328.hg.1	9.04	7.54	0.74	1.21	2.83	0.02	NM_001127257; NM_020342; ENST00000359634; ENST00000409086; ENST00000412905; ENST00000418005; ENST00000430412; ENST00000444421; ENST00000458054; ENST00000464301; ENST00000465851; BC101516; BC112223; OTTHUMT00000334995; OTTHUMT00000335185; OTTHUMT00000335186; OTTHUMT00000335187; OTTHUMT00000335189; OTTHUMT00000335190; OTTHUMT00000335191; OTTHUMT00000335192; OTTHUMT00000335193; uc002uth.4	SLC39A10	solute carrier family 39 (zinc transporter), member 10	ENSG00000196950	SLC39A10	Liver cancer,Glioma,Pancreatic cancer		favorable
TC1300008626.hg.1	7.11	5.61	0.09	0.1	2.83	0.0005	NM_001127217; NM_005905; ENST00000350148; ENST00000379826; ENST00000399275; ENST00000483941; BC011559; BC104760; BC104762; BC143240; OTTHUMT00000044525; OTTHUMT00000044526; OTTHUMT00000044527; uc001uvw.3	SMAD9	SMAD family member 9	ENSG00000120693	SMAD9	Glioma,Thyroid cancer		favorable
TC0200011400.hg.1	12.86	11.54	0.24	0.68	2.5	0.0057	NM_001008491; NM_001008492; NM_001282972; NM_001282973; NM_004404; NM_006155; ENST00000360051; ENST00000366210; ENST00000391971; ENST00000391973; ENST00000401990; ENST00000402092; ENST00000407017; ENST00000407971; ENST00000411484; ENST00000420786; ENST00000421717; ENST00000425899; ENST00000428282; ENST00000428524; ENST00000429791; ENST00000434955; ENST00000436795; ENST00000437066; ENST00000441533…	SEPT2	septin 2	ENSG00000168385	2017-09-02	Liver cancer,Glioma	SEPT2	favorable
TC1100008847.hg.1	9.23	8.14	0.35	0.83	2.14	0.0248	NM_001243776; NM_001243777; NM_014679; ENST00000325486; ENST00000325542; ENST00000535224; ENST00000535497; ENST00000536587; ENST00000537093; ENST00000537677; ENST00000538095; ENST00000538158; ENST00000538658; ENST00000539855; ENST00000540830; ENST00000541150; ENST00000541365; ENST00000541768; ENST00000544522; BC001233; BC039711; OTTHUMT00000395982; OTTHUMT00000395983; OTTHUMT00000395984; OTTHUMT0…	CEP57	centrosomal protein 57kDa	ENSG00000166037	CEP57	Glioma		favorable
TC1900011719.hg.1	5.64	4.57	0.27	0.46	2.11	0.0105	NM_144689; ENST00000304239; ENST00000337995; ENST00000585862; ENST00000586540; ENST00000587082; ENST00000589245; ENST00000589461; BC026210; OTTHUMT00000109586; OTTHUMT00000109587; OTTHUMT00000457632; OTTHUMT00000457633; OTTHUMT00000457634; OTTHUMT00000457639; OTTHUMT00000457640	ZNF420	zinc finger protein 420	ENSG00000197050	ZNF420	Glioma,Renal cancer		favorable
TC1000009684.hg.1	13.54	12.58	0.17	0.39	1.95	0.0147	NM_001115156; NM_001494; ENST00000380127; ENST00000380181; ENST00000380191; ENST00000418688; ENST00000447751; ENST00000456041; ENST00000479928; ENST00000608581; ENST00000609712; BC005145; OTTHUMT00000046580; OTTHUMT00000046581; OTTHUMT00000046582; OTTHUMT00000046583; OTTHUMT00000046584; OTTHUMT00000046585; OTTHUMT00000046586; OTTHUMT00000472259; OTTHUMT00000472260; uc001iil.4	GDI2	GDP dissociation inhibitor 2	ENSG00000057608	GDI2	Liver cancer,Glioma		favorable
TC1100011091.hg.1	6.44	7.41	0.08	0.25	-1.95	0.0104	NM_001288721; NM_001288722; NM_001288723; NM_012200; NR_109991; ENST00000265471; ENST00000531383; ENST00000532585; ENST00000533303; ENST00000534026; ENST00000534715; BC007906; BC071961; OTTHUMT00000395588; OTTHUMT00000395589; OTTHUMT00000395590; OTTHUMT00000395591; OTTHUMT00000395592; OTTHUMT00000395593; uc001ntw.3	B3GAT3	beta-1,3-glucuronyltransferase 3	ENSG00000149541	B3GAT3	Liver cancer,Glioma		unfavorable
TC1900011153.hg.1	7.22	8.21	0.11	0.1	-1.98	0.0081	NM_006270; ENST00000246792; ENST00000601532; BC016286; BC016318; OTTHUMT00000465791; OTTHUMT00000465792	RRAS	related RAS viral (r-ras) oncogene homolog	ENSG00000126458	RRAS	Glioma,Renal cancer,Lung cancer		unfavorable
TC0700012813.hg.1	6.78	7.77	0.17	0.19	-1.99	0.009	NM_015689; ENST00000275884; ENST00000461883; ENST00000469373; ENST00000475837; ENST00000477488; ENST00000489552; ENST00000491728; ENST00000492720; ENST00000496613; ENST00000537639; BC115004; BC132875; OTTHUMT00000348742; OTTHUMT00000348743; OTTHUMT00000348744; OTTHUMT00000348746; OTTHUMT00000348747; OTTHUMT00000348748; OTTHUMT00000348749; OTTHUMT00000348750; OTTHUMT00000348751; uc003vvw.3	DENND2A	DENN/MADD domain containing 2A	ENSG00000146966	DENND2A	Colorectal cancer,Glioma,Renal cancer		unfavorable
TC1000009997.hg.1	4.25	5.28	0.31	0.25	-2.03	0.0102	NM_001010911; ENST00000377113; BC130594; BC132974; OTTHUMT00000047130	CASC10	cancer susceptibility candidate 10	ENSG00000204682	CASC10	Urothelial cancer,Glioma		unfavorable
TC1100006495.hg.1	9.27	10.29	0.33	0.04	-2.03	0.009	NM_001025234; NM_001025235; NM_001025236; NM_001025237; NM_001025238; NM_001025239; NM_003271; ENST00000346501; ENST00000397396; ENST00000397397; ENST00000397404; ENST00000397406; ENST00000397408; ENST00000397411; ENST00000409531; ENST00000409543; ENST00000464987; ENST00000468468; ENST00000494815; ENST00000524895; ENST00000525201; ENST00000525334; ENST00000526055; ENST00000527644; ENST00000529566…	TSPAN4	tetraspanin 4	ENSG00000214063	TSPAN4	Liver cancer,Glioma		unfavorable
TC1100009740.hg.1	6.21	7.28	0.07	0.2	-2.11	0.0054	NM_001172223; NM_053005; ENST00000329957; ENST00000526462; ENST00000526698; ENST00000529380; ENST00000529897; ENST00000531976; ENST00000614710; BC047291; BC067785; OTTHUMT00000384770; OTTHUMT00000394982; OTTHUMT00000394983; OTTHUMT00000394984; OTTHUMT00000394985; OTTHUMT00000394986	MOB2	MOB kinase activator 2	ENSG00000182208	MOB2	Glioma,Renal cancer		unfavorable
TC0700007409.hg.1	9.62	10.76	0.2	0.56	-2.2	0.0091	NM_001029835; NM_001167934; NM_001167935; NM_031443; NR_030770; ENST00000258781; ENST00000381112; ENST00000461377; ENST00000470837; ENST00000472223; ENST00000474617; ENST00000475551; ENST00000476594; ENST00000477605; ENST00000478169; ENST00000478582; ENST00000480382; ENST00000480658; ENST00000481194; ENST00000482714; ENST00000488727; ENST00000492883; ENST00000541586; ENST00000544363; BC004903; BC…	CCM2	cerebral cavernous malformation 2	ENSG00000136280	CCM2	Colorectal cancer,Glioma,Renal cancer,Pancreatic cancer		unfavorable
TC0700010945.hg.1	4.39	5.52	0.31	0.95	-2.2	0.0266	NM_001146334; ENST00000460409; ENST00000490531; OTTHUMT00000353652; OTTHUMT00000353653	NACAD	NAC alpha domain containing	ENSG00000136274	NACAD	Glioma		unfavorable
TC2000007224.hg.1	4.63	5.78	0.54	0.65	-2.23	0.0165	NM_003116; ENST00000374273; ENST00000430878; ENST00000454819; ENST00000462896; ENST00000463973; ENST00000468248; ENST00000498203; OTTHUMT00000078896; OTTHUMT00000126425; OTTHUMT00000126426; OTTHUMT00000126427; OTTHUMT00000126428; OTTHUMT00000126429; OTTHUMT00000126430	SPAG4	sperm associated antigen 4	ENSG00000061656	SPAG4	Urothelial cancer,Colorectal cancer,Glioma,Renal cancer,Endometrial cancer		unfavorable
TC1500008232.hg.1	4.82	6.05	0.02	0.22	-2.34	0.0024	NM_001303233; NM_001303234; NM_001303235; NM_001303236; NM_001303237; NM_002201; NR_130134; ENST00000306072; ENST00000379224; ENST00000546338; ENST00000557824; ENST00000558236; ENST00000558942; ENST00000558992; ENST00000559876; ENST00000560573; ENST00000560741; ENST00000560746; BC007922; OTTHUMT00000309069; OTTHUMT00000415507; OTTHUMT00000415508; OTTHUMT00000415509; OTTHUMT00000415510; OTTHUMT000…	ISG20	interferon stimulated exonuclease gene 20kDa	ENSG00000172183	ISG20	Glioma,Renal cancer,Ovarian cancer		unfavorable
TC0700013620.hg.1	7.97	9.32	0.13	0.28	-2.56	0.0015	NM_000883; NM_001102605; NM_001142573; NM_001142574; NM_001142575; NM_001142576; NM_001304521; NM_183243; ENST00000338791; ENST00000348127; ENST00000354269; ENST00000419067; ENST00000460045; ENST00000468842; ENST00000469328; ENST00000470772; ENST00000473463; ENST00000480861; ENST00000484496; ENST00000489263; ENST00000491376; ENST00000496200; ENST00000496487; ENST00000497868; ENST00000626419; BC03…	IMPDH1	IMP (inosine 5-monophosphate) dehydrogenase 1	ENSG00000106348	IMPDH1	Liver cancer,Urothelial cancer,Cervical cancer,Glioma,Renal cancer		unfavorable
TC0700011488.hg.1	8.37	9.76	0.59	0.59	-2.63	0.0059	NM_001168347; NM_001168348; NM_018044; NM_148956; ENST00000252594; ENST00000310326; ENST00000428206; ENST00000438747; ENST00000455763; ENST00000471461; ENST00000478977; BC008084; OTTHUMT00000252112; OTTHUMT00000252113; OTTHUMT00000345915; OTTHUMT00000345916; OTTHUMT00000345917; OTTHUMT00000345918; OTTHUMT00000345919	NSUN5	NOP2/Sun domain family, member 5	ENSG00000130305	NSUN5	Liver cancer,Glioma		unfavorable
TC1100012528.hg.1	8.95	10.42	0.5	0.57	-2.77	0.0034	NM_001311160; NM_001311162; NM_006288; ENST00000284240; ENST00000524659; ENST00000524970; ENST00000527590; ENST00000528295; ENST00000528522; ENST00000532974; ENST00000533840; ENST00000580275; ENST00000584021; BC065559; OTTHUMT00000388370; OTTHUMT00000388372; OTTHUMT00000388373; OTTHUMT00000388374; OTTHUMT00000388375; OTTHUMT00000388376; OTTHUMT00000388377; OTTHUMT00000388378; OTTHUMT00000447244; …	THY1	Thy-1 cell surface antigen	ENSG00000154096	THY1	Glioma,Renal cancer		unfavorable
TC0900007977.hg.1	7.94	9.49	0.11	0.22	-2.92	0.0005	NM_032310; ENST00000375464; ENST00000466409; ENST00000466929; ENST00000468781; ENST00000475574; ENST00000488630; ENST00000490488; ENST00000495641; ENST00000498243; BC004500; BC038856; OTTHUMT00000053128; OTTHUMT00000053129; OTTHUMT00000053130; OTTHUMT00000053131; OTTHUMT00000053132; OTTHUMT00000053133; OTTHUMT00000053134; OTTHUMT00000053135; OTTHUMT00000053136	CARD19	caspase recruitment domain family, member 19	ENSG00000165233	CARD19	Liver cancer,Glioma		unfavorable
TC1200007693.hg.1	6.9	8.48	0.3	0.42	-3	0.0009	NM_002178; ENST00000301464; ENST00000548176; ENST00000548547; ENST00000549628; BC003507; BC005007; BC010162; BC011708; OTTHUMT00000405812; OTTHUMT00000405813; OTTHUMT00000405814; OTTHUMT00000405815	IGFBP6	insulin like growth factor binding protein 6	ENSG00000167779	IGFBP6	Glioma		unfavorable
TC1700010827.hg.1	5.07	6.83	0	0.35	-3.38	0.0003	hsa_circ_0000774	GRN	Memczak2013 ANTISENSE, CDS, coding, INTERNAL best transcript NM_002087	ENSG00000030582	GRN	Glioma		unfavorable
TC0300013458.hg.1	6.87	8.64	0.11	0.27	-3.41	0.0002	NM_052969; ENST00000296277; ENST00000433055; ENST00000455270; BC012328; OTTHUMT00000344282; OTTHUMT00000344283; OTTHUMT00000344284	RPL39L	ribosomal protein L39-like	ENSG00000163923	RPL39L	Glioma,Ovarian cancer,Endometrial cancer		unfavorable
TC0200011898.hg.1	8.49	10.53	0.09	0.41	-4.13	9.82e-05	NM_001006946; NM_002997; ENST00000254351; ENST00000381150; ENST00000403076; ENST00000429035; ENST00000447124; ENST00000482879; BC008765; OTTHUMT00000207495; OTTHUMT00000323931; OTTHUMT00000323933; OTTHUMT00000323934; OTTHUMT00000474533	SDC1	syndecan 1	ENSG00000115884	SDC1	Breast cancer,Glioma		unfavorable
TC0100006755.hg.1	9.24	11.36	0.4	0.14	-4.35	7.45e-05	hsa_circ_0000013	ENO1	Memczak2013 ANTISENSE, coding, INTERNAL, UTR3 best transcript NM_001428	ENSG00000074800	ENO1	Liver cancer,Glioma		unfavorable

## Sheet: 34short
Gene Symbol	Fold Change	P-val					Percent of all differentially-regulated
ZBTB6	6.42	4.84e-05				3403 genes	0.6
IFI44L	4.86	6.19e-05				Prognostic genes
ZNF322	4.62	0.0003			UP	2015	0.61
FOXN2	4.08	0.0001			DOWN	1388	0.58
MIER1	3.65	0.0001
TBL1XR1	3.63	0.0002
ARHGAP12	3.25	0.0002
ZNF253	3.03	0.0032
ASNSD1	2.85	0.0007
SLC39A10	2.83	0.02
SMAD9	2.83	0.0005
SEPT2	2.5	0.0057
CEP57	2.14	0.0248
ZNF420	2.11	0.0105
GDI2	1.95	0.0147
B3GAT3	-1.95	0.0104
RRAS	-1.98	0.0081
DENND2A	-1.99	0.009
CASC10	-2.03	0.0102
TSPAN4	-2.03	0.009
MOB2	-2.11	0.0054
CCM2	-2.2	0.0091
NACAD	-2.2	0.0266
SPAG4	-2.23	0.0165
ISG20	-2.34	0.0024
IMPDH1	-2.56	0.0015
NSUN5	-2.63	0.0059
THY1	-2.77	0.0034
CARD19	-2.92	0.0005
IGFBP6	-3	0.0009
GRN	-3.38	0.0003
RPL39L	-3.41	0.0002
SDC1	-4.13	9.82e-05
ENO1	-4.35	7.45e-05

## Sheet: Table
Three-year survival of the TCGA Cohort Glioma Patients stratified into distinct subgroups based on 34-gene P-bi-TAT glioma survival signature
Classification category	Patients, n	Death events, n	Death events, %	Survival, %
TCGA Glioma	530	71	13.3962	86.6038
P-bi-TAT transcritpional reversal signature (50% stratification threshold)
Classification category	Patients, n	Death events, n	Death events, %	Survival, %
Top 50%	265	17	6.41509	93.5849
Bottom 50%	265	54	20.3774	79.6226
P-bi-TAT transcritpional reversal signature (33% stratification threshold)
Classification category	Patients, n	Death events, n	Death events, %	Survival, %
Top 33%	177	10	5.64972	94.3503
Middle 33%	176	19	10.7955	89.2045
Bottom 33%	177	42	23.7288	76.2712
P-bi-TAT transcritpional reversal signature (25% stratification threshold)
Classification category	Patients, n	Death events, n	Death events, %	Survival, %
1st quartile	133	8	6.01504	93.985
2nd quartile	132	9	6.81818	93.1818
3rd quartile	132	18	13.6364	86.3636
4th quartile	133	36	27.0677	72.9323
P-bi-TAT transcritpional reversal signature (20% stratification threshold)

## Sheet: KM Survival analysis
4 groups					4 groups
Comparison of Survival Curves					Number of rows	530	530	530	530
					# of blank lines	398	399	400	397
Log-rank (Mantel-Cox) test (recommended)					# rows with impossible data	0	0	0	0
Chi square	40.12				# censored subjects	124	122	112	97
df	3				# deaths/events	8	9	18	36
P value	<0.0001
P value summary	****				Median survival	Undefined	Undefined	Undefined	Undefined
Are the survival curves sig different?	Yes
Logrank test for trend (recommended)
Chi square	34.21
df	1
P value	<0.0001
P value summary	****
Sig. trend?	Yes
Gehan-Breslow-Wilcoxon test
Chi square	45.04
df	3
P value	<0.0001
P value summary	****
Are the survival curves sig different?	Yes
